# Supplementary material for: Magmatic Surge Requires Two-Stage Model for the Laramide Orogeny
Source: Research Square preprint supplement (doi:10.21203/rs.3.rs-2327151/v1), 2023-01-11
Supplement: Supplementary file 1 [file 6cc8c1bbea8ced2dddec49d3.xlsx]

## Sheet: Table 1 New U-Pb data summary
Supplementary Table 1. Sample localities and geochronology summary for samples analyzed at California State University Laser Chronology Lab
Sample	Pluton	Rock typei	Latitude	Longitude	Chronometer	Primary	Age	Date	Error (2SE)	Error (2SE)	MSWD	Number	Analytical
						standard	calculation	(Ma)	Internal	Total		analyzedii	Instrument
Cucamonga terrane (eastern San Gabriel block)
SGM12-20 (cores)	Cucamonga Granulite (1N34)	Garnet orthogneiss	34.1958	-117.463	zircon	91500	weighted average	86.1	0.7	1.722	1.8	7	SHRIMP-RG
SGM12-20 (rims)	Cucamonga Granulite (1N34)	Garnet orthogneiss	34.1958	-117.463	zircon	91500	weighted average	83.8	1.5	1.676	1.2	7	SHRIMP-RG
17SGM49	Cucamonga Granulite (1N34)	Garnet orthogneiss	34.193	-117.463	zircon	91500	weighted average	82.5	0.6	1.65	1.5	46	LA-SF-ICPMS
17SGM50	Cucamonga Granulite (1N34)	Biotite orthogneiss	34.1931	-117.463	zircon	91500	weighted average	82.2	1	1.644	2.6	25	LA-SF-ICPMS
17SGM51	Cucamonga Granulite (1N34)	Lineated orthogneiss	34.1935	-117.463	zircon	91500	weighted average	77.7	1.2	1.554	2.4	19	LA-SF-ICPMS
GREG-6	Charnockite (Etiwanda Cyn.)	Charnockite dike	34.1782	-117.522	zircon	91500	weighted average	87.5	2.7	1.75	5.8	5	SHRIMP-RG
12EC2A	Cucamonga Granulite (Etiwanda Cyn.)	Garnet orthogneiss	34.1852	-117.53	zircon	91500	weighted average	85.6	1.3	1.712	1.8	11	LA-SF-ICPMS
12EC6	Cucamonga Granulite (Etiwanda Cyn.)	Calc-Silicate	34.1782	-117.522	zircon	91500	weighted average	90.6	0.9	1.812	1	21	LA-SF-ICPMS
12EC6	Cucamonga Granulite (Etiwanda Cyn.)	Calc-Silicate	34.1782	-117.522	zircon	91500	weighted average	86.1	2.5	1.722	1.6	5	SHRIMP-RG
12EC7	Cucamonga Granulite (Etiwanda Cyn.)	Quartzo-feldspathic gneiss	34.1862	117.523	zircon	91500	weighted average	85.9	1.6	1.718	1.9	8	LA-SF-ICPMS
12EC8	Cucamonga Granulite (Etiwanda Cyn.)	Quartzo-feldspathic gneiss	34.1862	-117.523	zircon	91500	weighted average	84	1.2	1.68	2.4	11	LA-SF-ICPMS
13EC17	Cucamonga Granulite (Etiwanda Cyn.)	Mafic orthogneiss	34.179	-117.52	zircon	91500	weighted average	72	1.3	1.44	7.1	5	LA-SF-ICPMS
13SGM37	Smith Ridge (Day Canyon)	Charnockite	34.1831	-117.545	zircon	91500	weighted average	87.1	0.6	1.742	3.5	40	LA-SF-ICPMS
13SGM38	Smith Ridge (Day Canyon)	Charnockite	34.1844	-117.547	zircon	91500	weighted average	77.8	1.2	1.556	1.1	25	LA-SF-ICPMS
13SGM34	Smith Ridge (Day Canyon)	Migmatitic garnet granulite	34.1828	-117.544	zircon	91500	weighted average	77.9	0.6	1.558	3.1	26	LA-SF-ICPMS
21CM25	Cucamonga Granulite (Cucamonga Cyn.)	Post-kinematic dike	34.179	-117.627	zircon	91500	weighted average	85.6	0.7	1.712	2	35	LA-SF-ICPMS
21CM32	Cucamonga Granulite (Cucamonga Cyn.)	Boudenaged charnokite dike	34.1788	-117.629	zircon	91500	weighted average	169.2	1.4	3.384	3.1	16	LA-SF-ICPMS
21CM33	Cucamonga Granulite (Cucamonga Cyn.)	Skarn	34.1773	-117.625	titanite	MKED	lower intercept	90	2.3	1.8	1.8	86	LA-SF-ICPMS
21CM37	Cucamonga Granulite (Cucamonga Cyn.)	Syn-deformational charnockite dike	34.1811	-117.629	zircon	91500	weighted average	88.6	1.7	1.772	2.9	5	LA-SF-ICPMS
21CM49a (cores)	Cucamonga Granulite (Cucamonga Cyn.)	Mylonitic tonalite	34.0947	-117.678	zircon	91500	weighted average	84.6	0.9	1.692	2.3	13	LA-SF-ICPMS
21CM49a (rims)	Cucamonga Granulite (Cucamonga Cyn.)	Mylonitic tonalite	34.0947	-117.678	zircon	91500	weighted average	76.6	0.9	1.532	1.7	14	LA-SF-ICPMS
21CM49b (cores)	Cucamonga Granulite (Cucamonga Cyn.)	Garnet orthogneiss	34.0947	-117.678	zircon	91500	weighted average	97.9	1.7	1.958	2.8	5	LA-SF-ICPMS
21CM49b (rims)	Cucamonga Granulite (Cucamonga Cyn.)	Garnet orthogneiss	34.0947	-117.678	zircon	91500	weighted average	75.5	1.7	1.51	3.7	4	LA-SF-ICPMS
21CM50a (cores)	Cucamonga Granulite (Cucamonga Cyn.)	Megacrystic granite	34.1718	-117.633	zircon	91500	weighted average	118.7	2.1	2.374	2.9	7	LA-SF-ICPMS
21CM50a (rims)	Cucamonga Granulite (Cucamonga Cyn.)	Megacrystic granite	34.1718	-117.633	zircon	91500	weighted average	76.2	1.4	1.524	0.6	5	LA-SF-ICPMS
21CM50b (cores)	Cucamonga Granulite (Cucamonga Cyn.)	Banded gneiss	34.1718	-117.633	zircon	91500	weighted average	121.1	1.4	2.422	4.5	10	LA-SF-ICPMS
21CM50b (rims)	Cucamonga Granulite (Cucamonga Cyn.)	Banded gneiss	34.1718	-117.633	zircon	91500	weighted average	77.1	1.9	1.542	1.7	6	LA-SF-ICPMS
LCVI	Cucamonga Granulite (Cucamonga Cyn.)	Skarn	34.2128	-117.457	titanite	MKED	lower intercept	82.5	0.8	1.65	3.1	57	LA-SF-ICPMS
LCVIA	Cucamonga Granulite (Cucamonga Cyn.)	Skarn	34.2128	-117.457	titanite	MKED	lower intercept	78.8	0.6	1.576	3.5	29	LA-SF-ICPMS
San Antonio Terrane (eastern San Gabriel block)
SGM12-13 (cores)	Tonalite of San Sevaine (1N34)	Biotite hornblende tonalite	34.2002	-117.482	zircon	91500	weighted average	85.8	0.6	1.716	1.5	4	SHRIMP-RG
SGM12-13 (rims)	Tonalite of San Sevaine (1N34)	Biotite hornblende tonalite	34.2002	-117.482	zircon	91500	weighted average	75.5	5.3	1.51	4.3	9	SHRIMP-RG
SGM12-12	Felsic dike (1N34)	Granite dike	34.198	-117.48	zircon	91500	weighted average	76.2	0.5	1.524	1.1	6	SHRIMP-RG
SGM12-19	Felsic dike (1N34)	Post-kinematic aplite dikelette	34.1977	-117.471	zircon	91500	weighted average	74	0.7	1.48	0.8	4	SHRIMP-RG
17SGM47	Mylonitized tonalite of San Sevaine (1N34)	Mylonitic tonalite	34.1962	-117.471	zircon	91500	weighted average	80.4	0.8	1.608	3.1	34	LA-SF-ICPMS
17SGM48	Mylonitized tonalite of San Sevaine (1N34)	Mylonitic tonalite	34.1955	-117.471	zircon	91500	weighted average	79.8	0.6	1.596	2.2	60	LA-SF-ICPMS
SGM12-25	Tonalite of San Sevaine (1N34)	Biotite hornblende tonalite	34.2141	-117.501	zircon	91500	weighted average	89.4	0.5	1.788	2.6	57	LA-SF-ICPMS
SGM12-27	Tonalite of San Sevaine (1N34)	Biotite hornblende tonalite	34.2127	-117.53	zircon	91500	weighted average	87.7	0.6	1.754	1.5	31	LA-SF-ICPMS
21CM47a (cores)	Mylonitized tonalite of San Sevaine (Cucamonga Cyn)	Mylonitic tonalite	34.1846	-117.627	zircon	91500	weighted average	87.6	1.5	1.752	1.4	5	LA-SF-ICPMS
21CM47a (rims)	Mylonitized tonalite of San Sevaine (Cucamonga Cyn)	Mylonitic tonalite	34.1846	-117.627	zircon	91500	weighted average	78.7	2.5	1.574	0	2	LA-SF-ICPMS
21CM47b	Mylonitized tonalite of San Sevaine (Cucamonga Cyn)	Mylonitic tonalite	34.1846	-117.627	titanite	MKED	lower intercept	83.4	3.4	1.668	4.6	78	LA-SF-ICPMS
21CM44a (cores)	Tonalite of San Sevaine (Cucamonga Cyn.)	Biotite hornblende tonalite	34.1823	-117.628	zircon	91500	weighted average	96.4	1.1	1.928	1.5	11	LA-SF-ICPMS
21CM44a (rims)	Tonalite of San Sevaine (Cucamonga Cyn.)	Biotite hornblende tonalite	34.1823	-117.628	zircon	91500	weighted average	88	0.9	1.76	1.2	13	LA-SF-ICPMS
San Gabriel terrane (San Gabriel block)
13SGM43	Josephine Mnt Intrusion at Monte Cristo	Granite	34.3271	-118.124	zircon	91500	weighted average	79.9	1.6	1.598	1.2	14	LA-SF-ICPMS
13SGM44	Mt. Lowe Intrusion at Chileo	Biotite granite	34.3203	-118.012	zircon	91500	weighted average	223.6	11	4.472	1.7	15	LA-SF-ICPMS
13SGM45	Waterman Batholith at Cloudburst	Biotite hornblende tonalite	34.3496	-117.929	zircon	91500	weighted average	77.7	1.2	1.554	1.9	27	LA-SF-ICPMS
13SGM46	Mt. Wilson pluton at Observatory	Diorite	34.2216	-118.059	zircon	91500	weighted average	73.2	1.2	1.464	1.9	20	LA-SF-ICPMS
17SGM52	Mt. Wilson pluton at Observatory	Biotite-hornblende diorite	34.2259	-118.068	zircon	91500	weighted average	67	1.2	1.34	1.3	12	LA-SF-ICPMS
17SGM53	Waterman Batholith at Camp Valcrest	Biotite hornblende tonalite	34.3402	-117.98	zircon	91500	weighted average	73.2	0.8	1.464	3.9	15	LA-SF-ICPMS
17SGM54	Josephine Mnt Intrusion at Hidden Springs	Granite	34.3153	-118.136	zircon	91500	weighted average	76.4	1.1	1.528	3.8	14	LA-SF-ICPMS
17SGM55	Josephine Mnt Intrusion at JPL	Granite	34.2116	-118.171	zircon	91500	weighted average	74.2	1	1.484	4.8	10	LA-SF-ICPMS
18SGM59	Unnamed (Bridge to Nowhere)	Granite	34.2577	-117.748	zircon	91500	weighted average	141.2	1.4	2.824	2.5	36	LA-SF-ICPMS
18SGM60	Unnamed (Bridge to Nowhere)	Biotite granite	34.2571	-117.755	zircon	91500	upper intercept	1423	19	28.46	1.2	42	LA-SF-ICPMS
Pine Mountain block
20MP1	Granite of Mt Pinos at Mt. Pinos CG	tonalite	34.8098	-119.108	zircon	91500	weighted average	78.9	0.4	1.578	2.6	45	LA-SF-ICPMS
20MP3	Granite of Cerro Noroeste at McGill CG	granite	34.8139	-119.103	zircon	91500	weighted average	157.8	0.8	3.156	2.8	16	LA-SF-ICPMS
20MP7	Proterozoic migmatitic gneiss	Biotite gneiss	34.839	-119.217	zircon	91500	upper intercept	1753	10	35.06	3.6	27	LA-SF-ICPMS
20MP9	Proterozoic biotite gneiss	Biotite gneiss	34.8287	-119.202	zircon	91500	upper intercept	1757	9	35.14	4.1	48	LA-SF-ICPMS
20MP11b	Granite of Cerro Noroeste	Granitic gneiss	34.8243	-119.228	zircon	91500	upper intercept	663.2	6.7	13.264	1.6	142	LA-SF-ICPMS
21MP13	Granite of Cerro Noroeste	Biotite granodiorite	34.8194	-119.228	zircon	91500	weighted average	159.5	1.7	3.19	1.4	11	LA-SF-ICPMS
21MP15a	Granodiorite gneiss	Diorite gneiss	34.8216	-119.186	zircon	91500	weighted average	77.4	0.5	1.548	4.3	48	LA-SF-ICPMS
21MP15b	Granodiorite gneiss	Porphyritic diorite gneiss	34.8216	-119.186	zircon	91500	weighted average	81.2	0.5	1.624	2.7	31	LA-SF-ICPMS
21MP15b	Granodiorite gneiss	Porphyritic diorite gneiss	34.8216	-119.186	titanite	MKED	lower intercept	76.8	1.2	1.536	5.1	20	LA-SF-ICPMS
21MP16	Granite of Cerro Noroeste	Tonalite gneiss	34.8149	-119.181	zircon	91500	weighted average	258.3	1.7	5.166	3.8	34	LA-SF-ICPMS
21MP16	Granite of Cerro Noroeste	Tonalite gneiss	34.8149	-119.181	titanite	MKED	lower intercept	75	1	1.5	4.1	27	LA-SF-ICPMS
21MP17	Granodiorite gneiss	Tonalite gneiss	34.8181	-119.181	zircon	91500	weighted average	79	0.5	1.58	4.2	40	LA-SF-ICPMS
21MP17	Granodiorite gneiss	Tonalite gneiss	34.8181	-119.181	titanite	MKED	lower intercept	74.2	1.2	1.484	3.2	60	LA-SF-ICPMS
21MP18	Granodiorite gneiss	Granodiorite gneiss	34.8137	-119.167	zircon	91500	weighted average	250.6	2	5.012	1.7	35	LA-SF-ICPMS
21MP20	Granite of Cerro Noroeste	Muscovite biotite granite	34.8099	-119.174	zircon	91500	weighted average	70.9	2.2	1.418	2	3	LA-SF-ICPMS
21MP21	Granodiorite gneiss	Biotite granodiorite	34.827	-119.195	zircon	91500	weighted average	70.4	0.6	1.408	3	18	LA-SF-ICPMS
Alamo Mnt. (Frazier Mountain-Alamo Mountain block)
AM-WP-001	Proterozoic augen gneiss	Granodiorite porphyry	34.6783	-118.954	zircon	91500	upper intercept	1662	10	33.24	4.4	53	LA-SF-ICPMS
AM-WP-002	Proterozoic biotite gneiss	Biotite gneiss	34.6479	-118.959	zircon	91500	upper intercept	1706	11	34.12	2.4	21	LA-SF-ICPMS
AM-WP-003	Lockwood Creek granite?	Mylonitized leucogranite	34.6456	-118.959	zircon	91500	weighted average	139.8	3.7	2.796	2.9	2	LA-SF-ICPMS
AM-WP-006	Stewart Mountain pluton	Biotite granite	34.6407	-118.907	zircon	91500	weighted average	65	0.9	1.3	2.3	12	LA-SF-ICPMS
AM-WP-007+	McDonald Peak pluton	Granodiorite	34.6333	-118.94	zircon	91500	weighted average	147.1	1	2.942	2.9	32	LA-SF-ICPMS
AM-JS-5A	Proterozoic biotite gneiss	Quartz-feldspar gneiss	34.6384	-118.931	zircon	91500	upper intercept	1705	11	34.1	3.9	33	LA-SF-ICPMS
AM-JS-5B	Post-kinematic dike	Stewart Mountain granite	34.6384	-118.931	zircon	91500	weighted average	75.6	1.4	1.512	6.6	4	LA-SF-ICPMS
AM-JS-6	Stewart Mountain pluton	Biotite granite	34.6383	-118.922	zircon	91500	weighted average	72.4	0.8	1.448	1.6	11	LA-SF-ICPMS
AM-JS-7B	Proterozoic augen gneiss	Mylonitic augen gneiss	34.6714	-118.979	zircon	91500	upper intercept	1650	10	33	2.8	39	LA-SF-ICPMS
AM-JS-8	Lockwood Creek granite	Biotite granite	34.6704	-118.981	zircon	91500	weighted average	149.9	1	2.998	2.9	27	LA-SF-ICPMS
AM-JS-9	Lockwood Creek granite	Biotite granite	34.6713	-118.982	zircon	91500	weighted average	152.2	1.2	3.044	2.5	26	LA-SF-ICPMS
iMineral abbreviations after Whitney and Evans (2010).
iiZircons used in age calculations.
	0.0141119

## Sheet: Table 2 U-Pb LA-ICP-MS zircon
Supplementary Table 2. LA-SF-ICPMS U-Pb isotope data for zircons from the SCB
				Isotope Ratios¶					Apparent Ages¶
	U	U/Th		238U	2 sigma	207Pb	2 sigma	207Pb/206Pb v 238U/206Pb	207/235	1 sigma	206/238	1 sigma	207/206	1 sigma		Best age	1 sigma		% discordance
Analysis	(ppm)			206Pb	abs	206Pb	abs	error corr	age	abs err	age	abs err	age	abs err		age†	abs err		6/8 vs. 7/5	6/8 vs. 7/6
									Ma	Ma	Ma	Ma	Ma	Ma		Ma	Ma
San Gabriel block (Cucamonga terrane)
21CM25-57	122.015	2.70278		18.7458	2.21332	0.0601426	0.00312217	-0.129894	372	21	335	19	608	56		332	19		-11.0448	-81.4925
21CM25-34	54.5637	1.49263		66.5301	2.37149	0.0509831	0.00399187	0.284404	101.9	3.7	96.2	1.7	239	90		95.8	1.7		-5.92516	-148.441
21CM25-37	33.5896	1.27399		65.4657	3.62757	0.0729622	0.00934493	-0.416271	145	11	97.7	2.7	1012	130		94.7	2.6		-48.4135	-935.824
21CM25-4.c	41.9656	1.25966		67.4608	2.7819	0.0566533	0.00600707	-0.0570055	111.2	6.1	94.9	1.9	477	117		94.1	1.9		-17.176	-402.634
21CM25-28	66.9175	1.86418		67.2295	3.56951	0.0612165	0.0119175	-0.0690101	120	12	95.2	2.5	646	209		94.1	2.5		-26.0504	-578.571
21CM25-51	31.6963	1.85289		68.0298	2.43145	0.0614102	0.00802423	0.0229282	119.1	7.6	94.1	1.7	653	140		92.5	1.6		-26.5675	-593.943
21CM25-26.c	58.71	1.09112		69.8623	3.4454	0.0497258	0.00572851	0.614295	95	4.2	91.6	2.2	181	134		91.4	2.2		-3.71179	-97.5983
21CM25-38	80.4873	1.51868		70.0662	3.20064	0.0512709	0.00501039	0.0542986	97.6	4.9	91.4	2.1	252	112		91	2.1		-6.78337	-175.711
21CM25-53	106.314	1.38324		69.7744	4.19986	0.0548011	0.00653078	0.423693	104.4	5.4	91.7	2.7	403	133		90.9	2.7		-13.8495	-339.477
21CM25-7	54.7862	1.63394		69.485	2.78418	0.0610259	0.00911834	0.106662	116	8.3	92.1	1.8	639	161		90.6	1.8		-25.9501	-593.811
21CM25-27	35.4049	2.36988		70.3796	4.61645	0.0513686	0.00609642	-0.122943	97.3	6.6	91	3	256	136		90.5	2.9		-6.92308	-181.319
21CM25-9.r	59.5108	1.25069		70.8121	3.72791	0.0515168	0.00647995	0.475848	97	5.1	90.4	2.4	263	144		90	2.4		-7.30088	-190.929
21CM25-18.r	48.9765	1.89071		70.6918	4.11627	0.0597498	0.0121797	-0.0848643	112	11	90.6	2.6	594	221		89.6	2.6		-23.6203	-555.629
21CM25-52	64.576	1.76753		71.3967	3.06442	0.0525006	0.00600464	-0.327545	98	6.3	89.7	1.9	306	130		89.1	1.9		-9.25307	-241.137
21CM25-36	41.4502	2.08907		71.6124	2.76613	0.0523186	0.00620201	-0.047733	97.4	5.9	89.4	1.7	298	135		89	1.7		-8.94855	-233.333
21CM25-2.c	33.3187	1.24669		71.4728	3.56026	0.0551622	0.00565099	-0.159165	102.6	5.9	89.6	2.2	418	114		88.7	2.2		-14.5089	-366.518
21CM25-54.r	31.3441	1.21085		70.3805	4.22473	0.0708852	0.0222296	0.28775	132	19	90.9	2.7	953	321		88.3	2.6		-45.2145	-948.405
21CM25-2.r	67.3155	1.1381		72.4023	3.0403	0.0510881	0.00438922	0.244699	94.2	3.9	88.4	1.8	244	99		88.1	1.8		-6.56109	-176.018
21CM25-3	29.1267	2.64038		72.4865	3.79425	0.0530538	0.00731096	0.435732	97.6	5.8	88.3	2.3	330	156		87.7	2.3		-10.5323	-273.726
21CM25-45	58.1971	1.589		72.6374	4.25358	0.0532511	0.00681262	0.237393	97.7	5.9	88.1	2.6	338	145		87.5	2.5		-10.8967	-283.655
21CM25-6	40.0252	2.14849		73.2965	3.15755	0.0526334	0.00682675	-0.0749771	95.8	6.4	87.4	1.9	312	148		87	1.9		-9.61098	-256.979
21CM25-24	97.2051	1.44909		73.3641	2.76509	0.0508767	0.0038306	0.218334	92.7	3.4	87.3	1.6	234	87		86.9	1.6		-6.18557	-168.041
21CM25-19	67.5431	1.46773		73.306	3.2096	0.0535245	0.00739913	0.235008	97.4	6.3	87.3	1.9	350	156		86.7	1.9		-11.5693	-300.916
21CM25-43	50.9458	1.88989		72.8787	4.4749	0.062741	0.00853667	-0.0716369	113.8	8.3	87.9	2.7	699	145		86.7	2.6		-29.4653	-695.222
21CM25-1	48.9559	1.39906		73.865	3.39878	0.0507276	0.00549095	0.173225	91.8	4.8	86.7	2	227	125		86.4	2		-5.88235	-161.822
21CM25-22.c	39.0711	2.25855		73.0605	3.50261	0.0636146	0.00868022	-0.0119057	115.1	7.9	87.6	2.1	728	145		86.4	2.1		-31.3927	-731.05
21CM25-22.r	60.6044	1.91593		73.2622	2.94577	0.0576436	0.00593711	-0.241016	104.5	5.9	87.4	1.7	515	113		86.3	1.7		-19.5652	-489.245
21CM25-12.r	63.6459	1.62462		73.919	3.92326	0.0519148	0.00606514	0.227182	93.8	5.2	86.6	2.3	281	134		86.2	2.3		-8.31409	-224.48
21CM25-14.c	89.4171	2.24428		74.3151	3.79368	0.0511122	0.00471715	-0.0256418	92	4.7	86.2	2.2	245	106		85.9	2.2		-6.72854	-184.223
21CM25-54.c	87.007	1.62166		74.4761	2.86891	0.0527893	0.00497893	-0.0675738	94.6	4.7	86	1.6	319	107		85.6	1.6		-10	-270.93
21CM25-40	88.9104	1.40172		70.5375	4.91521	0.0937679	0.0313563	-0.677649	171	30	90.7	3.1	1503	316		85.5	3		-88.5336	-1557.11
21CM25-21	105.683	2.01068		74.7811	3.00673	0.0498866	0.00327846	0.30393	89.3	2.8	85.6	1.7	189	76		85.4	1.7		-4.32243	-120.794
21CM25-44	40.817	1.9936		73.8513	3.22688	0.0654739	0.00920262	-0.146386	117.1	8.5	86.7	1.9	789	148		85.3	1.9		-35.0634	-810.035
21CM25-18.c	64.935	1.6265		73.7271	3.62686	0.0632869	0.00799498	0.17331	113.5	6.8	86.8	2.1	717	134		85.2	2.1		-30.7604	-726.037
21CM25-47	51.603	2.32588		74.2077	2.54222	0.0613877	0.00726013	-0.258849	109.6	6.8	86.3	1.5	652	127		85.2	1.5		-26.9988	-655.504
21CM25-11	91.8905	1.55545		74.6992	2.54776	0.056392	0.00595178	-0.030148	100.5	5.4	85.7	1.5	467	117		85.1	1.4		-17.2695	-444.924
21CM25-17.c	95.4592	1.61094		74.5317	2.74486	0.0558742	0.00404407	0.0512718	99.8	3.8	85.9	1.6	446	80		85	1.6		-16.1816	-419.208
21CM25-25	53.1308	2.29572		75.1311	3.37967	0.0496213	0.00379839	0.312026	88.5	3.2	85.2	1.9	176	89		85	1.9		-3.87324	-106.573
21CM25-32	77.0392	2.32896		75.4255	5.24477	0.0483358	0.00630222	0.602888	85.9	4.3	84.9	2.9	115	154		84.8	2.9		-1.17786	-35.4535
21CM25-35	55.8185	2.50241		74.7345	4.38875	0.0561644	0.00506652	0.00844689	100.1	5.1	85.7	2.5	458	100		84.8	2.5		-16.8028	-434.422
21CM25-29.r	64.7544	2.18438		75.2386	5.02778	0.0519892	0.00611296	0.215599	92.4	5.4	85.1	2.8	284	134		84.7	2.8		-8.57814	-233.725
21CM25-8	53.8858	2.21004		75.1321	3.19352	0.0543093	0.00650116	0.0730669	96.4	5.7	85.2	1.8	383	135		84.5	1.8		-13.1455	-349.531
21CM25-31	95.0009	2.11057		75.1049	2.51377	0.0553857	0.00680539	0.469432	98.3	5.2	85.3	1.4	427	137		84.4	1.4		-15.2403	-400.586
21CM25-12.c	95.1759	1.41136		76.1204	3.28079	0.0520617	0.00514249	0.386027	91.5	4	84.1	1.8	287	113		83.7	1.8		-8.79905	-241.26
21CM25-42	59.7571	2.17081		76.3493	3.48626	0.0501319	0.00500121	0.425406	88	3.8	83.9	1.9	200	116		83.6	1.9		-4.88677	-138.379
21CM25-20	37.9141	2.33809		75.4566	3.95862	0.0609681	0.00884388	0.154268	107.2	7.4	84.9	2.2	637	156		83.5	2.2		-26.2662	-650.294
21CM25-14.r	64.7158	3.03956		76.2674	3.83394	0.0531663	0.00606588	0.15636	93.1	5.2	84	2.1	335	129		83.4	2.1		-10.8333	-298.81
21CM25-16	73.8216	1.55058		76.2641	4.27784	0.0609355	0.008312	-0.0155673	106.1	7.5	84	2.3	636	147		83	2.3		-26.3095	-657.143
21CM25-46	83.5744	1.47848		76.7496	3.56669	0.0531779	0.00631297	0.261113	92.6	5.1	83.5	1.9	335	135		82.9	1.9		-10.8982	-301.198
21CM25-33	61.0705	2.19894		76.9307	3.29016	0.0518401	0.00700879	0.373772	90.2	5.4	83.3	1.8	277	155		82.8	1.8		-8.28331	-232.533
21CM25-5	47.948	1.76323		76.7027	4.51536	0.0594794	0.00826459	-0.151195	103.1	7.8	83.5	2.4	584	151		82.6	2.4		-23.4731	-599.401
21CM25-30	123.538	1.62497		77.6896	3.06555	0.0473719	0.00389301	-0.0465975	81.9	3.7	82.4	1.6	67	98		82.5	1.6		0.606796	18.6893
21CM25-41	24.3279	2.04574		74.7522	5.0768	0.0841077	0.0203737	0.471349	146	15	85.7	2.9	1294	236		81.8	2.8		-70.3617	-1409.92
21CM25-49	50.1404	1.80914		77.0673	4.43949	0.0597669	0.00732114	0.0140072	103.1	6.6	83.1	2.4	594	133		81.8	2.3		-24.0674	-614.801
21CM25-17.r	37.7525	1.56563		75.8681	3.45688	0.0730827	0.0112922	0.529379	126.6	8.1	84.4	1.9	1015	157		81.7	1.9		-50	-1102.61
21CM25-15	96.8705	1.61386		78.1187	3.45182	0.0537692	0.00612556	-0.0222244	92	5.4	82	1.8	360	129		81.6	1.8		-12.1951	-339.024
21CM25-56	86.0871	1.43109		78.2464	5.07261	0.0506294	0.00571026	-0.0610056	86.7	5.5	81.9	2.6	223	130		81.6	2.6		-5.86081	-172.283
21CM25-48	106.064	1.3078		78.7066	3.42759	0.0494971	0.00326904	0.384767	84.4	2.6	81.4	1.8	170	77		81.2	1.8		-3.6855	-108.845
21CM25-50	45.5355	0.872603		79.6095	4.27882	0.0596159	0.00528485	-0.167252	99.7	5.3	80.5	2.1	589	96		79.3	2.1		-23.8509	-631.677
21CM25-39	88.9944	2.44373		79.7558	3.23239	0.0584839	0.00768642	-0.343726	97.8	7	80.3	1.6	547	144		79.2	1.6		-21.7933	-581.196
21CM25-29	98.6799	1.60542		80.7273	2.81272	0.0639112	0.00469933	-0.0830682	105.2	4.2	79.4	1.4	738	78		78.2	1.4		-32.4937	-829.471
21CM25-13	81.884	1.68896		81.8766	3.68986	0.0571648	0.00500249	0.357913	93.3	3.7	78.3	1.8	497	96		77.3	1.7		-19.1571	-534.738
21CSUN32-35	3493.26	10.7305		34.1022	0.990857	0.0496046	0.00126915	0.451198	185.52	2.44	186.31	2.67	175.5	29.8		186.37	2.67		0.424024	5.80216
21CSUN32-1	2785.35	11.961		34.8211	0.816947	0.0484416	0.00101754	0.318208	178.1	2.13	182.52	2.11	119.8	24.8		182.82	2.11		2.42165	34.3634
21CSUN32-16	2779.88	12.9967		35.1545	1.0341	0.0483971	0.00146696	0.4276	176.4	2.59	180.81	2.62	117.7	35.7		181.11	2.63		2.43902	34.904
21CSUN32-9	1889.66	15.8963		35.9397	1.01945	0.0492495	0.00164287	0.324729	175.65	2.91	176.92	2.48	158.7	39		177	2.48		0.717839	10.2984
21CSUN32-17	1697.97	15.9219		36.0748	1.44889	0.0479671	0.00186823	0.407575	170.85	3.39	176.26	3.49	96.6	46.1		176.63	3.5		3.06933	45.1946
21CSUN32-5	831.479	18.8214		36.3388	1.06297	0.0498905	0.00157758	0.0793207	175.96	3.34	175	2.53	188.8	36.8		174.94	2.52		-0.548571	-7.88571
21CSUN32-20	1659.64	15.2374		36.7115	1.34907	0.0502359	0.00185859	0.336251	175.43	3.42	173.25	3.14	204.9	42.9		173.1	3.14		-1.2583	-18.2684
21CSUN32-28	2005.37	25.0518		37.2057	1.05108	0.0504452	0.00172753	0.274914	173.95	3.03	170.98	2.38	214.5	39.7		170.78	2.38		-1.73705	-25.4533
21CSUN32-31	1063.7	18.1234		37.2699	1.38971	0.0491107	0.00161006	0.146402	169.44	3.58	170.69	3.14	152.1	38.4		170.77	3.14		0.732322	10.8911
21CSUN32-22	1763.89	13.6748		37.2559	1.41483	0.0513586	0.00170602	-0.0606699	176.62	4.21	170.75	3.2	255.9	38.2		170.36	3.19		-3.43777	-49.8682
21CSUN32-14	1599.07	15.5442		37.5093	1.23335	0.0471933	0.00163069	0.256349	162.36	3.09	169.61	2.75	57.9	41.2		170.09	2.76		4.27451	65.8629
21CSUN32-37	1414.67	24.7837		37.649	1.2125	0.050109	0.00200055	0.325203	171.01	3.33	168.99	2.69	199	46.4		168.85	2.68		-1.19534	-17.7584
21CSUN32-19	1131.98	16.7022		37.6037	1.35662	0.05177	0.00166658	0.217838	176.41	3.47	169.19	3.01	274.2	36.9		168.71	3		-4.26739	-62.0663
21CSUN32-21	1774	20.4298		37.688	1.19418	0.0501147	0.00217543	0.475051	170.86	3.13	168.82	2.64	199.3	50.4		168.68	2.64		-1.20839	-18.0547
21CSUN32-30	1519.88	17.7237		38.0995	1.37537	0.0487035	0.0018096	0.264746	164.76	3.38	167.02	2.98	132.5	43.7		167.17	2.98		1.35313	20.6682
21CSUN32-10	1537.52	28.1169		38.5805	1.14574	0.0505418	0.00199584	0.295595	168.53	3.25	164.96	2.42	218.9	45.7		164.72	2.41		-2.16416	-32.6988
21CSUN32-26	1374.56	8.15794		39.3648	1.60266	0.0476628	0.00216148	0.442271	156.7	3.31	161.72	3.25	81.5	53.8		162.05	3.26		3.10413	49.6043
21CSUN32-23	1068.19	12.3912		39.2742	1.69978	0.0505379	0.002048	0.310207	165.77	3.77	162.08	3.46	218.8	46.9		161.84	3.46		-2.27665	-34.9951
21CSUN32-29	720.294	24.0665		39.3602	1.17487	0.0516714	0.00262141	0.138917	168.86	4.29	161.73	2.38	269.9	58.2		161.26	2.38		-4.40858	-66.8831
21CSUN32-2	1001.71	21.4871		40.7178	1.37462	0.0484595	0.00176274	0.373088	154.22	2.81	156.41	2.61	120.7	42.9		156.55	2.61		1.40017	22.831
21CSUN32-15	1522.13	17.4431		40.8273	1.0694	0.0496425	0.00221452	0.373131	157.31	3.09	155.99	2.02	177.2	52		155.9	2.02		-0.846208	-13.597
21CSUN32-8	1133.15	19.0285		42.9411	2.09821	0.0502375	0.00218594	0.250111	151.78	4	148.4	3.58	205	50.5		148.18	3.58		-2.27763	-38.1402
21CSUN32-3	617.96	13.347		44.5305	1.28977	0.0486095	0.00293187	0.150382	142.3	4.17	143.16	2.05	128	71		143.22	2.05		0.600726	10.5896
21CSUN32-34	1076.31	21.4903		44.5823	1.42937	0.0503793	0.001945	0.455328	146.97	2.55	143	2.27	211.5	44.7		142.74	2.26		-2.77622	-47.9021
21CSUN32-24	1363.42	13.1022		45.0559	1.02784	0.050004	0.00205096	0.38759	144.52	2.59	141.51	1.6	194.1	47.7		141.31	1.59		-2.12706	-37.1635
21CSUN32-27	1724.7	5.3829		46.2196	1.54201	0.0485544	0.00232411	0.486756	137.29	2.76	137.99	2.28	125.3	56.3		138.03	2.28		0.507283	9.19632
21CM32-7	2509.19	13.393		47.0328	1.7567	0.0484737	0.00210355	-0.0691298	134.9	3.7	135.6	2.5	121	51		135.7	2.5		0.516224	10.767
21CSUN32-13	1196.62	27.6632		47.2842	2.0836	0.0489584	0.00224675	0.346072	135.44	3.26	134.91	2.94	144.8	53.8		134.88	2.94		-0.392854	-7.33081
21CSUN32-18	623.491	14.123		49.8109	2.26143	0.0476294	0.00265679	0.288755	125.7	3.6	128.14	2.88	79.8	66.2		128.29	2.88		1.90417	37.7244
21CSUN32-11	1269.09	21.0848		49.6658	1.82081	0.0511613	0.00259292	0.169145	134.8	3.62	128.51	2.33	247.1	58.3		128.1	2.32		-4.89456	-92.2808
21CSUN32-6	996.719	12.847		53.1224	2.20509	0.0480552	0.00197012	0.0201213	119.3	3.25	120.22	2.47	100.9	48.5		120.28	2.47		0.765264	16.0705
21CSUN32-33	547.361	19.197		55.1052	2.80307	0.0482185	0.00319488	-0.306375	115.61	5.2	115.94	2.92	108.9	78.2		115.96	2.92		0.28463	6.07211
21CSUN32-32	1410.41	15.0393		55.364	2.19151	0.048698	0.00261985	0.08953	116.18	3.51	115.4	2.26	132.3	63.2		115.35	2.26		-0.67591	-14.6447
21CSUN32-7	200.011	1.92218		61.7347	1.84204	0.0504145	0.00607688	0.0568825	108.29	6.29	103.58	1.53	213	140		103.29	1.53		-4.54721	-105.638
21CSUN32-25	538.769	3.52406		64.1019	2.63212	0.0447566	0.00382358	-0.362067	93.29	4.78	99.79	2.03	0.00015	99.0618		100.2	2.04		6.51368	99.9998
21CSUN32-36	1645.55	6.62379		64.0093	2.27463	0.0464508	0.00237882	0.452379	96.79	2.18	99.93	1.76	20	61.5		100.13	1.77		3.1422	79.986
21CM32-5	518.785	7.83491		69.8112	3.86138	0.0515563	0.00276964	0.0974806	98.4	3.4	91.7	2.5	265	62		91.3	2.5		-7.30643	-188.986
21CSUN32-4	45.8284	0.92862		70.4182	4.8072	0.0551036	0.0210163	0.0803784	104	18.9	90.9	3.08	415	426		90.07	3.05		-14.4114	-356.546
21CM32-2	233.806	3.32026		69.2317	5.0831	0.0774557	0.0159253	0.297843	146	13	92.4	3.4	1132	205		89	3.2		-58.0087	-1125.11
21CSUN32-12	61.9231	0.818789		73.4794	3.37917	0.0440601	0.0153423	0.10864	80.6	13.4	87.14	1.99	0.00018	421.97		87.55	2		7.50516	99.9998
21CM32-3	251.988	1.49094		73.6895	3.71998	0.0508631	0.00359038	0.456158	92.3	2.9	86.9	2.2	234	81		86.6	2.2		-6.21404	-169.275
21CM32-4	84.5207	0.967327		81.1857	4.23585	0.0505135	0.0055951	0.33359	83.5	4.2	78.9	2	218	128		78.6	2		-5.83016	-176.299
21CM32-6	85.0891	1.11881		81.0789	3.67214	0.0716433	0.00876519	0.141997	116.7	6.8	79	1.8	975	125		76.6	1.7		-47.7215	-1134.18
21CM32-1	75.1274	1.12832		86.6362	3.9628	0.0586309	0.00620961	0.0588107	90.5	4.9	74	1.7	552	116		72.9	1.7		-22.2973	-645.946
21CM37-10	165.988	1.75718		68.7398	2.88242	0.0478946	0.00849328	0.581236	93.1	6.97	93.1	1.94	93	210		93.1	1.94		0	0.107411
21CM37-9	142.657	1.54471		68.5921	2.99731	0.0575522	0.00998988	0.286667	111.11	8.76	93.3	2.02	512	191		92.17	2		-19.089	-448.767
21CM37-1	118.766	1.58586		69.9059	3.29957	0.0526184	0.0105967	-0.158411	100.2	10.2	91.56	2.15	311	229		91.18	2.14		-9.43644	-239.668
21CM37-8	115.693	1.66138		68.8374	3.31581	0.0871221	0.00792035	0.213158	163.25	7.04	92.97	2.22	1362.3	87.6		88.4	2.11		-75.5943	-1365.31
21CM37-11	445.792	2.59646		73.1239	3.33178	0.0513492	0.00446149	0.0802776	93.8	4.25	87.56	1.98	255.5	99.9		87.17	1.97		-7.12654	-191.8
21CM37-5	235.092	1.38868		70.8254	3.50749	0.077074	0.00959779	0.0370693	141.89	8.76	90.38	2.22	1122	124		87.07	2.14		-56.9927	-1141.43
21CM37-12	167.894	1.87729		73.427	3.29537	0.0500623	0.00799387	0.217063	91.19	6.81	87.2	1.94	197	186		86.95	1.94		-4.57569	-125.917
21CM37-2	371.572	2.26249		74.8969	2.66874	0.0519355	0.00463937	0.27949	92.68	3.83	85.5	1.51	282	102		85.05	1.51		-8.39766	-229.825
21CM37-1	299.568	1.99873		75.404	3.14434	0.0529326	0.00339781	0.0598493	93.8	3.3	84.9	1.8	325	73		84.4	1.7		-10.4829	-282.803
21CM37-4	90.9852	1.39859		75.8698	4.41424	0.0495362	0.0117223	0.547984	87.49	8.82	84.41	2.44	172	276		84.22	2.43		-3.64886	-103.767
21CM37-4	325.522	1.94546		76.6752	3.94039	0.0651381	0.0038311	0.545762	112.4	2.8	83.5	2.1	778	62		81.7	2.1		-34.6108	-831.737
21CM37-7	137.584	2.35306		79.039	4.12084	0.0485756	0.00858163	-0.00122994	82.55	7.3	81.05	2.1	126	208		80.95	2.1		-1.85071	-55.4596
21CM37-6	235.26	2.0134		79.4986	4.29512	0.0480986	0.00696175	0.28711	81.32	5.44	80.58	2.16	103	171		80.54	2.16		-0.918342	-27.8233
21CM37-2	110.4	1.56103		62.3669	3.45948	0.291213	0.0202855	-0.0361722	504	18	102.5	2.8	3423	54		80.4	2.2		-391.707	-3239.51
21CM37-3	346.906	1.4593		81.2801	3.66445	0.0422066	0.00677744	0.449872	70.18	4.95	78.83	1.77	0.00015	187.755		79.36	1.78		10.973	99.9998
21CM37-3	180.481	1.66735		80.9325	2.86754	0.0692267	0.00842081	0.150809	113.2	6.5	79.2	1.4	905	125		77	1.4		-42.9293	-1042.68
21CM37-4.2	382.999	2.44593		87.0074	5.92878	0.0512718	0.0024369	0.397433	79.3	2.5	73.7	2.5	252	55		73.3	2.5		-7.59837	-241.927
21CM44a-3	326.075	0.900054		61.737	1.5365	0.0466506	0.00216922	0.27859	100.59	2.21	103.58	1.28	30.3	55.7		103.77	1.28		2.9	70.7
21CM44a-28	441.369	1.22465		62.0125	2.03664	0.0498168	0.00232233	0.213969	106.62	2.58	103.12	1.68	185.4	54.3		102.9	1.68		-3.4	-79.8
21CM44a-2	238.034	3.26636		63.3376	2.76795	0.0458963	0.00281492	0.251063	96.65	3.03	100.98	2.19	0.00017	74.9947		101.26	2.2		4.3	100
21CM44a-24	189.091	1.54761		64.254	3.13038	0.0459131	0.00363115	-0.100898	95.37	4.41	99.55	2.41	0.00018	98.9269		99.82	2.41		4.2	100
21CM44a-16	288.738	1.92834		64.236	2.39755	0.0479055	0.00255726	0.347678	99.34	2.53	99.58	1.84	93.5	63.2		99.6	1.84		0.2	6.1
21CM44a-23	115.253	1.97153		64.9971	2.32441	0.0419713	0.0035509	-0.0390138	86.57	3.86	98.42	1.75	0.00015	95.0737		98.95	1.76		12	100
21CM44a-11	249.702	1.47613		65.4728	2.42799	0.0496562	0.00266465	0.0654295	100.94	3.04	97.72	1.8	177.9	62.6		97.51	1.79		-3.3	-82.1
21CM44a-26	485.553	2.0129		66.1114	2.45209	0.0470656	0.00207354	0.167506	95.03	2.39	96.78	1.78	51.5	52.6		96.89	1.78		1.8	46.8
21CM44a-20	114.202	1.6084		66.1791	2.7001	0.0464077	0.00447557	0.477905	93.67	3.8	96.68	1.96	17.8	115.8		96.87	1.96		3.1	81.6
21CM44a-17	111.994	1.94987		66.0589	3.6189	0.0498368	0.00443558	0.481518	100.44	3.77	96.85	2.63	186	104		96.63	2.63		-3.7	-92
21CM44a-13	232.075	2.00856		66.1998	1.8653	0.0490948	0.00254351	0.0384853	98.81	2.73	96.65	1.35	151.3	60.7		96.51	1.35		-2.2	-56.5
21CM44a-4	237.459	2.05279		66.2455	2.11323	0.0491648	0.00289548	0.453627	98.88	2.48	96.58	1.53	154.6	69		96.44	1.53		-2.4	-60.1
21CM44a-5	155.965	2.08735		67.1044	2.6628	0.0505678	0.00370907	0.450265	100.33	3.14	95.36	1.88	220.1	84.9		95.04	1.87		-5.2	-130.8
21CM44a-19	104.791	1.68679		67.5404	2.53684	0.050182	0.00401166	0.0786585	98.99	4.04	94.75	1.77	202.4	92.8		94.48	1.76		-4.5	-113.6
21CM44a-6	117.454	1.69805		68.459	1.95189	0.0484289	0.00385424	-0.0590467	94.46	3.88	93.48	1.32	119.2	93.8		93.44	1.32		-1	-27.5
21CM44a-2	179.418	2.00474		61.4653	3.25166	0.14947	0.0221606	0.126066	293	19	104	2.7	2339	127		90.8	2.4		-181.731	-2149.04
21CM44a-9	96.3854	1.80612		70.4539	2.11329	0.0490947	0.00601413	0.167566	93.11	5.39	90.86	1.35	151	144		90.71	1.35		-2.5	-66.2
21CM44a-4	301.109	2.25728		70.6144	4.82019	0.0482804	0.00326355	-0.220708	91.4	4.6	90.7	3.1	112	80		90.6	3.1		-0.771775	-23.484
21CM44a-12	97.6105	1.85147		70.985	2.5191	0.0510183	0.00462282	0.220742	95.9	4.11	90.18	1.59	241	104		89.82	1.58		-6.3	-167.2
21CM44a-14	307.468	3.92078		71.5613	2.46688	0.0474462	0.00255993	0.0165607	88.78	2.7	89.46	1.53	70.7	64.2		89.5	1.53		0.8	21
21CM44a-15	122.316	1.9058		71.4213	2.65711	0.0513894	0.00510645	0.170619	96	4.58	89.63	1.66	257	114		89.23	1.65		-7.1	-186.7
21CM44a-13	55.9984	1.41259		45.9574	8.76981	0.33463	0.0633612	-0.953611	706	96	139	13	3638	145		89	8.4		-407.914	-2517.27
21CM44a-27	158.77	1.59102		70.9294	2.63676	0.0593656	0.00410598	0.231024	110.85	3.7	90.25	1.67	579.6	75.1		88.95	1.64		-22.8	-542.2
21CM44a-1	261.784	1.85528		72.6906	1.94752	0.0475511	0.00306396	0.215505	87.65	2.7	88.08	1.17	75.9	76.6		88.11	1.17		0.5	13.8
21CM44a-25	50.0798	2.19926		72.3093	3.13281	0.0539659	0.00835732	-0.111976	99.41	7.83	88.54	1.9	369	174		88.06	1.89		-12.3	-316.8
21CM44a-8	210.835	2.22327		72.8004	2.9485	0.0510977	0.00277998	-0.130406	93.8	3.2	87.9	1.8	244	63		87.6	1.8		-6.71217	-177.588
21CM44a-7	125.918	1.88135		72.8229	2.29362	0.0522462	0.00469127	0.303282	95.74	3.91	87.92	1.38	295	102		87.43	1.37		-8.9	-235.5
21CM44a-9	306.009	1.83319		73.082	2.25817	0.0523924	0.00256131	0.224867	95.7	2.4	87.6	1.3	302	56		87.1	1.3		-9.24658	-244.749
21CM44a-6	386.111	1.57382		73.5695	3.91189	0.0539489	0.00483951	0.332667	97.8	4.1	87	2.3	368	101		86.4	2.3		-12.4138	-322.989
21CM44a-22	171.262	2.17313		74.3496	2.28518	0.0467952	0.00456026	-0.0140175	84.46	4.16	86.13	1.31	37.7	116.6		86.2	1.32		1.9	56.2
21CM44a-5	184.94	1.53398		74.3193	3.11082	0.0493097	0.00287655	0.263211	88.8	2.6	86.2	1.8	162	68		86	1.8		-3.01624	-87.935
21CM44a-21	96.493	1.65736		72.1883	2.81755	0.0739483	0.00924597	0.388913	134.09	7.26	88.69	1.72	1039	126		85.78	1.66		-51.2	-1071.5
21CM44a-11	293.17	2.08721		75.2464	2.84516	0.0497384	0.00174609	0.270687	88.5	1.9	85.1	1.6	182	41		84.9	1.6		-3.9953	-113.866
21CM44a-10	126.818	1.75528		75.3694	2.95644	0.0486678	0.00425412	0.451342	86.56	3.24	84.97	1.66	131	103		84.87	1.65		-1.9	-54.2
21CM44a-1	211.01	1.62111		73.9121	2.71915	0.0768528	0.0135876	-0.390989	136	12	86.6	1.6	1116	176		84.4	1.5		-57.0439	-1188.68
21CM44a-10	257.097	1.95378		75.3357	2.74885	0.0638006	0.00465344	0.155057	112.1	4	85	1.5	734	77		83.3	1.5		-31.8824	-763.529
21CM44a-7	158.934	1.53116		70.7993	4.10969	0.119166	0.0209177	-0.626825	212	21	90.4	2.6	1943	157		82.3	2.4		-134.513	-2049.34
21CM44a-8	63.4805	2.03402		79.3944	3.6568	0.0465218	0.00610453	0.0893221	78.86	5.13	80.69	1.85	23.7	157.4		80.8	1.85		2.3	70.6
21CM44a-3	178.045	2.06922		80.2435	3.79107	0.0492708	0.00364095	0.300927	82.5	3	79.8	1.9	160	86		79.7	1.9		-3.38346	-100.501
21CM44a-18	65.3435	1.92633		81.449	4.57615	0.0502733	0.00646703	-0.0233336	82.9	5.63	78.66	2.2	207	149		78.48	2.19		-5.4	-163.2
21CM44a-12	226.241	2.35306		85.2335	3.4482	0.0601653	0.00549626	-0.347877	94.3	5	75.2	1.5	609	99		74	1.5		-25.3989	-709.84
21CM47a-3	222.9	1.88917		72.83	1.89836	0.0462623	0.00283938	0.189759	85.21	2.53	87.91	1.14	10.2	73.8		88.08	1.14		3.07132	88.3972
21CM47a-12	68.1686	1.40633		73.0685	4.32908	0.0565887	0.0134998	-0.0587608	103	12.2	87.63	2.58	475	264		86.94	2.56		-17.5397	-442.052
21CM47a-11	80.5976	2.23859		74.4463	2.56833	0.0462172	0.00538188	0.0307036	83.36	4.82	86.02	1.47	7.88	140.14		86.18	1.48		3.0923	90.8393
21CM47a-2	57.4165	1.34481		74.7281	3.32208	0.0535774	0.0085597	0.522457	95.68	6.47	85.69	1.89	352	180		85.07	1.88		-11.6583	-310.783
21CM47a-10	175.396	2.39676		75.8871	3.125	0.046277	0.0038517	0.0136376	81.94	3.64	84.39	1.73	11	100.1		84.55	1.73		2.90319	86.9653
21CM47a-8	210.959	1.52808		75.929	2.66823	0.0480178	0.00331207	0.132387	84.85	2.98	84.35	1.47	99.1	81.6		84.31	1.47		-0.592768	-17.4867
21CM47a-3	110.082	1.67356		73.9787	5.75156	0.0740632	0.0126067	-0.77425	131	15	86.6	3.3	1042	172		83.7	3.2		-51.2702	-1103.23
21CM47a-1	60.7144	1.56238		74.0265	3.88189	0.0919255	0.0139352	-0.217466	160	13	86.5	2.3	1465	144		83.1	2.2		-84.9711	-1593.64
21CM47a-4	66.3659	1.66303		77.7313	2.74268	0.0462612	0.00574932	0.545065	80.04	4.2	82.4	1.44	10.2	149.5		82.55	1.45		2.86408	87.6214
21CM47a-6	85.1388	2.038		75.7602	3.5987	0.0896004	0.0106203	-0.148734	153.32	9.54	84.53	1.99	1416	113		81.39	1.92		-81.3794	-1575.14
21CM47a-7	145.284	1.72321		80.0404	3.66504	0.0438852	0.00384151	-0.0679444	73.97	3.62	80.04	1.82	0.00017	103.204		80.31	1.83		7.58371	99.9998
21CM47a-9	202.663	2.85758		79.0603	2.08362	0.0591882	0.00440687	0.352053	99.7	3.31	81.03	1.06	573	81		79.85	1.05		-23.0408	-607.146
21CM47a-1	94.6393	1.73809		81.2675	3.93167	0.0480681	0.00500129	0.424625	79.57	3.61	78.84	1.9	102	123		78.79	1.89		-0.925926	-29.376
21CM47a-5	85.1317	1.6927		81.1689	3.57732	0.0504198	0.00654405	-0.0346996	83.4	5.55	78.93	1.73	213	150		78.74	1.72		-5.66325	-169.859
21CM47a-2	94.0908	1.68243		81.4205	6.3738	0.0624307	0.00881611	-0.641283	102	9.7	78.7	3.1	688	151		77.2	3		-29.6061	-774.206
21CM49a-42	157.758	1.52472		23.35	0.801417	0.0527868	0.00323813	0.274567	275.39	7.42	270.33	4.54	318.6	69.7		269.96	4.54		-1.87179	-17.856
21CM49a-17	829.348	38.4742		23.8468	0.894985	0.0521193	0.00180646	0.228707	267.35	5.28	264.81	4.87	289.6	39.6		264.63	4.87		-0.959178	-9.36143
21CM49a-8	599.399	2.08812		24.2666	1.0651	0.0510518	0.00226936	0.278589	258.51	6.05	260.32	5.6	242.1	51.2		260.45	5.6		0.695298	6.99908
21CM49a-50	414.865	2.66945		25.2231	1.05264	0.052734	0.00265711	0.276819	257.09	6.34	250.64	5.13	316.3	57.3		250.18	5.12		-2.57341	-26.1969
21CM49a-10	470.749	5.47303		27.4803	2.92701	0.0520111	0.00186674	0.097896	235.3	11.5	230.4	12.1	284.9	41		230.1	12		-2.12674	-23.6545
21CM49a-19	272.284	2.94607		56.212	2.17754	0.0475959	0.00304081	0.484925	112.07	2.99	113.67	2.18	78.2	75.9		113.77	2.18		1.40758	31.2044
21CM49a-36	1796.77	50.0991		59.115	4.19641	0.048874	0.00238104	0.412296	109.57	3.51	108.14	3.81	140.7	57.2		108.05	3.8		-1.32236	-30.1091
21CM49a-49	1016.54	97.8507		62.1587	2.60288	0.0510089	0.00317024	0.129572	108.79	3.63	102.88	2.14	240.2	71.6		102.51	2.13		-5.74456	-133.476
21CM49a-1	696.33	1.54653		64.7774	2.63504	0.0474028	0.00196094	0.341411	97.56	2.19	98.76	1.99	68.5	49.2		98.83	1.99		1.21507	30.6399
21CM49a-33	1489.88	2.59361		67.4578	3.11404	0.0485021	0.00221934	0.251224	95.94	2.57	94.86	2.17	122.8	53.9		94.79	2.17		-1.13852	-29.4539
21CM49a-27	419.114	1.56706		69.5701	2.49512	0.0470084	0.00278095	0.0423674	90.41	2.94	92	1.64	48.6	70.6		92.1	1.64		1.72826	47.1739
21CM49a-30	300.768	2.42417		69.7922	3.52962	0.047254	0.00490646	0.112907	90.58	4.78	91.71	2.3	61	123.7		91.78	2.3		1.23214	33.486
21CM49a-13	58.248	4.08131		65.7541	3.94425	0.095867	0.00914478	-0.28924	186	11	97.3	2.9	1544	90		91.5	2.7		-91.1614	-1486.84
21CM49a-4	273.481	1.55215		71.3164	2.48769	0.0481363	0.00279785	0.469817	90.32	2.24	89.76	1.55	104.9	68.7		89.73	1.55		-0.623886	-16.8672
21CM49a-31	385.804	1.95843		71.3984	2.2953	0.0519315	0.00321788	0.124752	97	3.06	89.66	1.43	281.4	70.9		89.2	1.42		-8.18648	-213.852
21CM49a-12	313.328	5.19096		70.6395	2.49115	0.070815	0.00521486	-0.113598	131.4	5.25	90.62	1.59	951.2	75.3		88.77	1.55		-45.0011	-949.658
21CM49a-28	230.342	1.63742		73.1907	4.76837	0.0497514	0.00882463	0.397597	90.93	7.08	87.48	2.83	182	207		87.26	2.82		-3.94376	-108.048
21CM49a-18	276.454	4.02954		73.4228	2.65157	0.0474375	0.00316792	0.247637	86.61	2.81	87.21	1.56	70.2	79.4		87.24	1.56		0.687994	19.5046
21CM49a-21	165.552	6.23958		60.3422	4.72738	0.192858	0.0308772	-0.775551	371	35	106	4.1	2766	131		86.7	3.4		-250	-2509.43
21CM49a-39	380.994	1.56804		73.9202	3.12248	0.0507917	0.00358398	-0.0617976	91.87	3.71	86.62	1.82	230.3	81.5		86.39	1.81		-6.06096	-165.874
21CM49a-12	576.657	2.33753		73.0776	3.3788	0.0662663	0.00460818	-0.055999	119.6	4.8	87.6	2	814	73		86.2	2		-36.5297	-829.224
21CM49a-22	398.41	1.97745		74.3259	2.98492	0.0494267	0.00316936	0.284615	89.04	2.78	86.15	1.72	167.1	74.9		85.97	1.71		-3.35461	-93.964
21CM49a-14	615.889	1.29553		75.0379	3.05347	0.0473186	0.00244843	0.449369	84.62	2.01	85.34	1.72	64.3	61.6		85.39	1.73		0.843684	24.6543
21CM49a-25	300.983	1.44401		75.0642	3.39075	0.047379	0.00227935	0.40332	84.69	2.07	85.31	1.91	67.3	57.2		85.35	1.91		0.726761	21.1112
21CM49a-10	83.902	7.75035		74.2462	2.60568	0.0631511	0.00563808	0.503955	112.6	4.1	86.2	1.5	712	95		84.6	1.5		-30.6265	-725.986
21CM49a-6	539.138	4.10455		75.4875	4.4394	0.0504688	0.00383516	0.640107	89.5	2.5	84.8	2.5	216	88		84.5	2.5		-5.54245	-154.717
21CM49a-16	1201.28	1.89331		75.9847	2.6551	0.0479835	0.00198591	0.323835	84.73	1.82	84.28	1.46	97.4	49		84.26	1.46		-0.533935	-15.5672
21CM49a-44	47.692	0.828797		76.8498	3.04724	0.0418663	0.00697662	0.168596	73.51	5.84	83.34	1.64	0.00015	174.692		83.95	1.65		11.7951	99.9998
21CM49a-6	718.477	3.54813		76.3166	3.23375	0.0484667	0.00191742	0.441535	85.19	1.77	83.92	1.77	121.1	46.6		83.84	1.76		-1.51335	-44.3041
21CM49a-5	1003.49	2.0381		76.4381	2.74279	0.047891	0.00178635	0.337991	84.1	1.7	83.79	1.49	92.8	44.2		83.77	1.49		-0.369973	-10.7531
21CM49a-40	227.045	3.58509		76.5082	3.03038	0.058048	0.00816896	0.197686	100.98	6.65	83.71	1.65	531	154		82.63	1.63		-20.6307	-534.333
21CM49a-34	683.009	0.912774		77.7336	3.27211	0.0498391	0.00226347	0.499798	85.98	1.81	82.4	1.72	186.4	52.9		82.18	1.72		-4.34466	-126.214
21CM49a-20	346.23	1.97182		78.4534	5.05576	0.0455432	0.00477111	0.320473	78.15	3.91	81.65	2.61	0.00016	118.031		81.87	2.62		4.28659	99.9998
21CM49a-45	385.44	3.04403		78.7391	5.07262	0.0439122	0.00386168	0.364064	75.19	3.19	81.35	2.6	0.00017	98.481		81.74	2.62		7.57222	99.9998
21CM49a-11	1094.13	3.47192		78.5166	2.67254	0.0479411	0.00382352	-0.246768	82.04	3.71	81.58	1.38	95.3	94.4		81.56	1.38		-0.563864	-16.8178
21CM49a-38	940.477	1.8454		78.834	3.67156	0.0513273	0.00260545	0.227789	87.25	2.53	81.26	1.88	254.5	58.4		80.88	1.87		-7.3714	-213.192
21CM49a-13	925.204	2.00301		79.8393	2.83097	0.0497562	0.00280594	0.375149	83.67	2.18	80.24	1.41	182.6	65.7		80.03	1.41		-4.27468	-127.567
21CM49a-5	281.712	2.17177		78.6454	3.12068	0.0624509	0.0041774	0.139697	105.5	3.6	81.5	1.6	689	71		79.9	1.6		-29.4479	-745.399
21CM49a-23	181.527	3.46848		80.3993	4.0586	0.0506227	0.00509654	0.178012	84.5	4.23	79.69	2	223	116		79.39	1.99		-6.03589	-179.834
21CM49a-2	68.7674	0.956394		80.76	4.13466	0.0508362	0.0134529	-0.0138122	84.5	11	79.33	2.02	232	305		79.11	2.01		-6.51708	-192.449
21CM49a-29	572.138	1.70885		80.8126	3.7979	0.050308	0.00314228	0.331819	83.58	2.59	79.28	1.85	208.2	72.4		79.01	1.85		-5.42381	-162.614
21CM49a-35	96.3489	2.78985		80.6037	4.24303	0.0543039	0.00740401	0.477219	90.15	5.2	79.48	2.08	383	153		78.82	2.06		-13.4248	-381.882
21CM49a-9	39.8619	1.46263		80.8227	4.58296	0.0536574	0.00923791	0.152186	88.9	7.36	79.27	2.23	356	194		78.67	2.22		-12.1484	-349.098
21CM49a-21	655.334	3.03049		81.6362	3.37172	0.047285	0.00245142	0.36344	77.98	2	78.49	1.61	62.6	61.7		78.52	1.61		0.649764	20.2446
21CM49a-37	1763.41	2.39058		81.5816	3.23356	0.0482513	0.00195515	0.467978	79.57	1.58	78.54	1.55	110.5	47.8		78.47	1.55		-1.31143	-40.6926
21CM49a-14.2	226.564	1.90602		82.2934	3.05489	0.0486438	0.00290555	0.0800973	79.52	2.59	77.86	1.44	129.6	70.3		77.76	1.43		-2.13203	-66.4526
21CM49a-3	54.3595	1.06898		83.6323	4.03506	0.0385626	0.00860016	0.0756045	62.56	6.81	76.62	1.84	0.00018	222.672		77.49	1.86		18.3503	99.9998
21CM49a-19	1207.48	2.8553		82.5058	3.84604	0.0514357	0.00227558	0.749911	83.7	1.3	77.7	1.8	259	51		77.3	1.8		-7.72201	-233.333
21CM49a-47	294.951	3.67058		83.3821	3.66262	0.0461826	0.00453587	-0.0518234	74.69	3.95	76.85	1.68	6.08	118.24		76.95	1.68		2.81067	92.0885
21CM49a-41	168.777	1.58572		83.4429	2.90339	0.0498679	0.00518775	0.108642	80.37	4.1	76.8	1.33	188	121		76.57	1.32		-4.64844	-144.792
21CM49a-32	208.36	2.65164		83.9464	3.30023	0.0491317	0.00465716	-0.0246814	78.77	3.92	76.34	1.49	153	111		76.23	1.49		-3.18313	-100.419
21CM49a-7	362.526	3.64648		84.0532	3.69573	0.0494266	0.00275336	0.0752357	79.1	2.6	76.2	1.7	167	65		76.1	1.7		-3.80577	-119.16
21CM49a-43	66.1697	0.835304		84.7656	4.62389	0.0466679	0.00697246	0.584435	74.26	4.5	75.6	2.05	31.2	179		75.69	2.05		1.77249	58.7302
21CM49a-15	84.8501	1.18834		84.4365	3.35241	0.05355	0.00477484	-0.0282101	85.08	4.02	75.9	1.5	351	101		75.49	1.49		-12.0949	-362.451
21CM49a-11	1576.85	4.97239		85.0894	2.52001	0.0486114	0.0021666	0.602096	77	1.3	75.3	1.1	128	52		75.2	1.1		-2.25764	-69.9867
21CM49a-8	134.17	3.07633		84.9448	3.4235	0.059941	0.00515748	0.216456	94.2	3.9	75.4	1.5	600	93		74.3	1.5		-24.9337	-695.756
21CM49a-26	111.174	0.852544		85.6427	3.47294	0.0586069	0.00740704	0.345973	91.51	5.19	74.83	1.51	552	138		73.79	1.49		-22.2905	-637.672
21CM49a-14	251.803	3.00494		85.0707	4.86242	0.0645756	0.00334732	0.260185	101	3.2	75.3	2.1	760	55		73.7	2.1		-34.1301	-909.296
21CM49a-17	382.962	3.59908		86.0913	7.194	0.0607314	0.00335883	-0.0597531	94.2	4.6	74.4	3.1	629	60		73.2	3		-26.6129	-745.43
21CM49a-7	149.136	1.27064		86.5181	2.81418	0.0587606	0.00482189	0.0490035	90.85	3.77	74.08	1.2	557.3	89.5		73.04	1.18		-22.6377	-652.295
21CM49a-3	273.479	2.54843		87.1746	3.44014	0.0556271	0.00361118	-0.0514237	85.6	3.2	73.5	1.4	437	72		73	1.4		-16.4626	-494.558
21CM49a-18	138.005	1.94008		85.9136	5.16488	0.066921	0.0070709	0.183951	103.5	5.5	74.6	2.2	834	110		72.8	2.2		-38.7399	-1017.96
21CM49a-24	190.328	2.34244		87.9907	4.0163	0.0508605	0.00416325	0.179427	77.83	3.23	72.85	1.65	233.5	94.5		72.54	1.65		-6.83596	-220.522
21CM49a-9	117.166	2.95671		86.9324	6.31442	0.0675193	0.00543431	-0.0767609	103.3	5.5	73.7	2.7	853	84		72.4	2.6		-40.1628	-1057.39
21CM49a-16	82.6479	1.91942		86.6394	4.26291	0.0652126	0.00720592	0.284699	100.2	5.1	74	1.8	780	116		72.3	1.8		-35.4054	-954.054
21CM49a-4	111.967	1.63282		87.3019	3.22023	0.0677277	0.00501357	0.149983	103.1	3.8	73.4	1.3	859	77		71.6	1.3		-40.4632	-1070.3
21CM49a-15	116.099	2.10237		88.5972	2.93534	0.0577825	0.0044967	0.0496151	87.4	3.5	72.4	1.2	521	85		71.4	1.2		-20.7182	-619.613
21CM49a-1	58.4602	1.17346		89.1183	4.86563	0.0603912	0.00922143	0.176494	90.7	6.6	71.9	2	617	165		70.8	1.9		-26.1474	-758.136
21CM49a-20	120.194	2.91981		88.2564	5.18002	0.0819979	0.00932325	0.150039	122.3	6.9	72.6	2.1	1245	111		69.5	2		-68.4573	-1614.88
21CM49a-2	53.2311	1.34506		88.8449	4.45477	0.0811117	0.00962417	0.177857	120.3	6.8	72.2	1.8	1223	117		69.1	1.7		-66.6205	-1593.91
21CM49a-22	95.1515	1.77842		90.8852	5.17768	0.0673433	0.00732719	0.338046	98.7	4.9	70.5	2	847	113		68.8	1.9		-40	-1101.42
21CM49a-46	35.3381	1.29227		99.3823	7.63714	0.0534558	0.0220644	-0.130294	72.6	15.1	64.54	2.47	347	467		64.19	2.45		-12.4884	-437.651
21CM49a-48	24.5766	1.32354		71.9277	10.2981	0.269493	0.0415651	0.461356	422.7	26.7	89.01	6.33	3302	121		64.18	4.57		-374.89	-3609.7
21CM49b-30	60.8239	1.54252		5.37834	0.371898	0.0851981	0.00543088	0.157587	1175.7	30.1	1099.3	34.9	1319.2	61.8		1087.9	34.6		-6.94988	-20.0036
21CM49b-15	527.192	4.72168		6.4513	0.292868	0.0755749	0.00218944	0.650855	975.9	10.8	929	19.6	1082.9	29.1		923	19.5		-5.04844	-16.5662
21CM49b-9	115.874	1.70834		6.89258	0.39222	0.0755121	0.0041604	0.637859	934	15	873	23	1081	55		866	23		-6.9874	-23.8259
21CM49b-14	445.916	1.82207		6.29294	0.404658	0.159662	0.00676477	0.129377	1526.5	28.5	950.7	28.4	2451.3	35.8		851.7	25.7		-60.5659	-157.842
21CM49b-28	395.138	2.73234		7.79986	0.379837	0.0740473	0.00386541	0.430222	849.4	15.5	777.6	17.8	1041.8	52.7		769.5	17.7		-9.23354	-33.9763
21CM49b-25	1057.32	3.59343		10.156	1.00566	0.0886025	0.0124187	0.208327	801.7	42.6	605.4	28.6	1395	134		584.8	27.7		-32.4248	-130.426
21CM49b-8	392.499	2.43512		10.4966	0.605493	0.0735336	0.00274983	0.419025	686	13	587	16	1028	38		577	16		-16.8654	-75.1278
21CM49b-5	455.75	1.84565		10.6173	0.70882	0.0958858	0.0183686	-0.164056	821	60	580	19	1545	180		562	18		-41.5517	-166.379
21CM49b-4	427.36	16.0924		12.1279	1.84422	0.15919	0.006569	-0.629407	1048.7	59.1	510.8	37.3	2446.3	34.9		447.9	32.9		-105.305	-378.915
21CM49b-7	289.159	4.63054		14.1451	1.01113	0.0743551	0.00374265	0.200968	553.3	16.8	440.3	15.2	1050.2	50.7		430.4	14.9		-25.6643	-138.519
21CM49b-27	260.062	5.79425		14.7594	3.10064	0.0742851	0.00435034	-0.325878	535	49	422.6	43	1048.3	59		412.9	42		-26.5973	-148.06
21CM49b-21	506.434	13.4545		25.5767	1.2425	0.0640004	0.00323441	0.00373702	300.85	9.11	247.24	5.89	740.7	53.5		243.32	5.8		-21.6834	-199.587
21CM49b-24	800.682	10.4894		26.2985	1.49027	0.0621686	0.0027743	0.349111	286.35	7.31	240.58	6.69	679	47.7		237.27	6.6		-19.0249	-182.235
21CM49b-12	537.78	2.87978		38.1783	1.23984	0.0497963	0.00220977	0.516301	167.85	3.03	166.68	2.67	184.4	51.7		166.6	2.67		-0.701944	-10.6311
21CM49b-23	1409.39	44.9617		37.7141	7.42124	0.0658127	0.00401445	-0.794059	218.8	24.4	168.7	16.4	799.5	63.9		165.3	16.1		-29.6977	-373.918
21CM49b-10	58.1966	1.03646		19.2433	1.91555	0.642703	0.0444067	-0.345672	1750	58	327	16	4607	50		155.5	7.6		-435.168	-1308.87
21CM49b-3	418.832	10.5298		32.5587	1.77166	0.233871	0.0109021	0.346226	699	15	195	5.2	3078	37		150.3	4		-258.462	-1478.46
21CM49b-26	222.038	4.80811		26.0084	3.19326	0.555423	0.0419772	-0.680256	1393.1	69.3	243.2	14.7	4394.8	55.2		134.33	8.16		-472.821	-1707.07
21CM49b-33	650.147	2.77223		60.084	3.07756	0.050103	0.00245589	-0.0383138	110.46	3.78	106.41	2.7	198.7	56.9		106.22	2.7		-3.80603	-86.7306
21CM49b-6	216.162	1.91574		45.542	3.70538	0.345895	0.0333776	-0.120447	727	35	140	5.6	3688	74		103.1	4.2		-419.286	-2534.29
21CM49b-6	1297.56	40.4808		63.71	1.95764	0.0481893	0.00214572	-0.176879	100.69	2.8	100.4	1.53	107.5	52.6		100.38	1.53		-0.288845	-7.07171
21CM49b-8	1367.25	66.8761		63.6972	2.31575	0.05022	0.0018472	0.480461	104.74	1.85	100.42	1.81	204.1	42.7		100.14	1.81		-4.30193	-103.246
21CM49b-9	1677.03	67.84		66.6535	2.49752	0.047087	0.00223165	0.422937	94.34	2.09	96	1.79	52.6	56.6		96.1	1.79		1.72917	45.2083
21CM49b-29	3636.65	122.375		67.9867	3.21116	0.0475529	0.00157567	0.485381	93.44	1.9	94.13	2.21	76	39.4		94.17	2.21		0.733029	19.2606
21CM49b-31	826.41	17.655		68.9597	4.71756	0.0520303	0.00273648	-0.0431634	100.45	4.21	92.81	3.15	285.7	60.1		92.47	3.14		-8.23187	-207.833
21CM49b-1	392.991	3.83024		61.6449	2.48536	0.158312	0.0288599	0.0174474	308	25	103.7	2.1	2437	154		89.4	1.8		-197.011	-2250.05
21CM49b-1	444.164	30.0107		46.1131	10.1526	0.338574	0.100444	-0.926177	710	130	138.3	15.1	3656	227		87.97	9.62		-413.377	-2543.53
21CM49b-18	7904.15	261.227		73.9741	2.65861	0.0463704	0.00143708	0.673378	84.14	1.11	86.56	1.55	15.8	37.2		86.71	1.55		2.79575	81.7468
21CM49b-35	2734.95	40.7837		74.0007	4.40339	0.0480485	0.00297342	0.455285	87.02	2.64	86.53	2.56	100.6	73.2		86.5	2.56		-0.566278	-16.2603
21CM49b-16	2063.54	56.5998		75.0788	3.07479	0.0483856	0.00211465	0.357218	86.4	1.99	85.3	1.74	117.1	51.5		85.23	1.73		-1.28957	-37.2802
21CM49b-13	590.877	3.90334		76.697	2.65036	0.0476544	0.00264349	0.222011	83.43	2.34	83.51	1.43	81.1	65.8		83.51	1.43		0.0957969	2.88588
21CM49b-20	4819.07	74.0993		77.7516	4.01113	0.0477284	0.00213157	0.42906	82.46	2.05	82.38	2.11	84.8	53		82.38	2.11		-0.0971109	-2.93761
21CM49b-3	292.64	2.34543		77.6628	3.76352	0.0489349	0.00304888	0.425474	84.55	2.45	82.48	1.99	143.7	73.1		82.35	1.98		-2.5097	-74.2241
21CM49b-5	6178.56	14.209		78.3516	3.05899	0.0468977	0.00113217	0.289177	80.48	1.53	81.75	1.59	42.9	28.9		81.83	1.59		1.55352	47.5229
21CM49b-10	724.062	1.19207		79.4751	2.72501	0.0464811	0.00297715	-0.0361174	78.71	2.79	80.61	1.37	21.6	76.9		80.69	1.37		2.35703	73.2043
21CM49b-4	279.277	1.48479		72.4607	3.43128	0.153468	0.00849409	-0.14938	260	9	88.4	2.1	2384	47		80.1	1.9		-194.118	-2596.83
21CM49b-2	829.514	12.0073		80.6045	3.56072	0.049607	0.00316405	0.362361	82.66	2.5	79.48	1.74	175.6	74.4		79.29	1.74		-4.00101	-120.936
21CM49b-19	510.079	2.00751		82.8217	3.82796	0.0483497	0.00343576	0.182935	78.57	2.92	77.37	1.78	115.4	83.8		77.29	1.78		-1.55099	-49.1534
21CM49b-2	533.062	4.33742		70.198	3.17135	0.174345	0.0120259	0.28745	298.9	9.2	91.2	2	2599	57		76.7	1.7		-227.741	-2749.78
21CM49b-22	2647.07	3.46211		84.5243	5.10248	0.0465329	0.0028235	0.200433	74.26	2.74	75.82	2.28	24.2	72.8		75.92	2.28		2.0575	68.0823
21CM49b-17	746.848	2.41096		78.6662	2.7283	0.114592	0.0123868	0.158823	185.77	9.18	81.43	1.4	1872.7	97.5		74.58	1.29		-128.135	-2199.77
21CM49b-7	2053.5	4.1807		87.1045	3.69779	0.0567251	0.00258539	0.652863	87.3	1.5	73.6	1.6	480	50		72.7	1.5		-18.6141	-552.174
21CM49b-32	1112.93	1.66238		88.4898	4.0848	0.0467038	0.0032527	0.374585	71.29	2.33	72.44	1.66	33	83.4		72.51	1.66		1.58752	54.4451
21CM49b-11	387.899	1.83745		89.7136	3.27359	0.0466267	0.00341849	0.311468	70.24	2.41	71.46	1.3	29.1	87.9		71.53	1.3		1.70725	59.2779
21CM49b-34	157.725	1.68353		92.5533	6.83679	0.0709683	0.00919404	0.115477	102	6.87	69.28	2.55	956	132		67.23	2.47		-47.2286	-1279.91
21CM50a-24	304.428	5.84672		43.4411	1.9128	0.0506447	0.00326863	0.32202	151.29	4.59	146.71	3.19	223.7	74.6		146.41	3.19		-3.1218	-52.4777
21CM50a-26	579.595	2.55415		43.681	3.19512	0.0542597	0.00373832	0.337623	160.46	6.07	145.92	5.28	380.8	77.4		144.96	5.24		-9.96436	-160.965
21CM50a-10	742.759	7.76896		48.6382	2.19343	0.047966	0.00171106	-0.157561	129.4	3.75	131.19	2.93	96.5	42.2		131.31	2.93		1.36443	26.4426
21CM50a-25	667.389	4.58905		50.0368	3.10944	0.0484993	0.00287586	0.210904	127.31	4.57	127.56	3.92	122.6	69.8		127.58	3.93		0.195986	3.88837
21CM50a-21	247.538	3.09188		52.0803	1.88824	0.047407	0.00335511	0.133222	120	4.25	122.61	2.2	68.7	84.2		122.77	2.2		2.1287	43.9687
21CM50a-18	514.367	8.68519		52.6471	2.95766	0.0519209	0.00267762	0.289205	129.4	3.91	121.3	3.38	280.9	59		120.77	3.36		-6.67766	-131.575
21CM50a-15	525.321	9.40237		53.6465	2.3402	0.0477812	0.00202807	0.513423	117.56	2.36	119.06	2.57	87.4	50.3		119.15	2.58		1.25987	26.5916
21CM50a-3	1545.45	6.50761		54.4648	2.10487	0.0508118	0.00249734	0.0822594	122.82	3.47	117.29	2.25	231.3	56.7		116.93	2.24		-4.71481	-97.2035
21CM50a-23	50.8442	3.66768		56.5725	2.80657	0.0415898	0.00778871	-0.0394438	97.99	9.14	112.95	2.78	0.00015	211.583		113.63	2.79		13.2448	99.9999
21CM50a-8	546.557	3.07217		56.8549	3.18483	0.0494856	0.00267116	0.70803	115.03	2.29	112.4	3.12	169.9	63		112.23	3.12		-2.33986	-51.1566
21CM50a-20	849.298	3.39274		58.1052	2.36152	0.0477963	0.00213559	0.322094	109.04	2.57	110	2.22	88.1	53		110.06	2.22		0.872727	19.9091
21CM50a-3.c	1375.83	11.796		58.3624	2.75023	0.0498588	0.00261209	0.412288	113.02	2.89	109.52	2.56	187.4	61		109.3	2.55		-3.19576	-71.1103
21CM50a-27	549.735	4.06068		61.2039	3.6249	0.0502232	0.00327519	0.176988	108.79	4.12	104.48	3.07	204.3	75.7		104.2	3.06		-4.12519	-95.5398
21CM50a-12	490.208	7.90133		61.7909	2.98037	0.0494499	0.00239879	0.224407	106.23	3.04	103.49	2.48	168.2	56.7		103.32	2.47		-2.6476	-62.5278
21CM50a-13	231.537	4.55065		62.0231	2.90351	0.0484263	0.003165	0.12642	103.77	3.72	103.11	2.39	119.1	77		103.06	2.39		-0.640093	-15.5077
21CM50a-29	466.358	3.89832		62.7815	3.77722	0.0459899	0.00309885	-0.0360049	97.66	4.28	101.87	3.04	0.00017	77.138		102.06	3.05		4.13272	99.9998
21CM50a-16	397.71	5.75917		63.2488	3.52034	0.0491999	0.00307664	0.224052	103.41	3.63	101.12	2.79	156.3	73.2		100.98	2.79		-2.26464	-54.5688
21CM50a-9	246.443	2.46896		63.4828	2.57713	0.0472571	0.00442553	0.0367418	99.17	4.76	100.75	2.03	61.2	111.6		100.85	2.03		1.56824	39.2556
21CM50a-9	45.4519	1.63792		53.3547	3.58106	0.247429	0.0399213	-0.577176	502	41	119.7	4	3168	128		98.6	3.3		-319.382	-2546.62
21CM50a-10	48.2152	1.5106		64.026	3.26191	0.0747224	0.00711869	-0.0502041	151.4	7.8	99.9	2.5	1060	96		97.5	2.5		-51.5516	-961.061
21CM50a-7	61.4899	1.46133		61.1916	2.79996	0.109633	0.0192593	0.0238063	224	18	104.5	2.4	1793	160		96.4	2.2		-114.354	-1615.79
21CM50a-11	152.031	3.20969		66.8277	2.97843	0.0448347	0.00465764	0.264508	89.79	4.37	95.75	2.12	0.00016	118.995		96.12	2.13		6.22454	99.9998
21CM50a-17	967.408	6.78559		66.383	3.27931	0.0508376	0.00179496	0.355241	101.88	2.4	96.39	2.36	232.4	40.8		96.04	2.35		-5.69561	-141.104
21CM50a-14	318.095	1.2887		67.1346	2.72627	0.0502326	0.00260146	0.307632	99.65	2.62	95.31	1.92	204.7	60.1		95.04	1.92		-4.55356	-114.773
21CM50a-2	865.95	28.8596		67.438	2.04637	0.049276	0.0027853	0.0951108	97.42	2.86	94.89	1.43	159.9	66.1		94.73	1.43		-2.66625	-68.5109
21CM50a-19	260.741	3.46882		69.3846	3.5482	0.0461912	0.00386562	0.428393	89.13	3.29	92.25	2.34	6.53	100.74		92.44	2.35		3.38211	92.9214
21CM50a-28	33.6582	1.56195		68.8599	4.87867	0.054368	0.0123338	0.110451	104.9	11.5	92.94	3.27	385	255		92.19	3.24		-12.8685	-314.246
21CM50a-22	38.9066	1.55759		71.4605	4.60516	0.0511408	0.0113706	0.541766	95.51	8.89	89.58	2.87	246	256		89.21	2.85		-6.61978	-174.615
21CM50a-5	678.026	7.60642		74.0108	2.82826	0.0516533	0.00322723	0.290644	93.25	2.81	86.52	1.64	269.1	71.6		86.1	1.63		-7.77855	-211.026
21CM50a-13	47.6176	1.7548		71.5151	3.17848	0.0915398	0.0109169	-0.00670374	165	9.7	89.5	2	1457	113		84.6	1.9		-84.3575	-1527.93
21CM50a-6	1056.89	5.34609		76.8885	3.03972	0.0480621	0.00237477	0.37013	83.91	2.04	83.3	1.64	101.3	58.4		83.26	1.64		-0.732293	-21.6086
21CM50a-14	155.742	2.32908		76.7434	2.31592	0.0553007	0.00463967	0.243257	96.1	3.8	83.5	1.3	423	94		82.7	1.2		-15.0898	-406.587
21CM50a-12	48.0122	1.76302		77.2736	2.99485	0.0525124	0.00795668	0.149023	90.9	6.6	82.9	1.6	307	173		82.4	1.6		-9.65018	-270.326
21CM50a-2	140.201	2.71158		78.0161	4.52861	0.0698575	0.00743415	-0.128548	118.2	7.1	82.1	2.4	923	109		80.5	2.3		-43.9708	-1024.24
21CM50a-11	60.7212	1.55244		80.6028	4.86427	0.0518134	0.00429367	0.00127055	86.2	4.2	79.5	2.4	276	95		79.1	2.4		-8.42767	-247.17
21CM50a-1	48.7923	1.90532		81.1188	3.497	0.0593486	0.00619958	-0.0927257	97.5	5.4	79	1.7	579	113		78.2	1.7		-23.4177	-632.911
21CM50a-6	78.2841	1.75606		80.1893	4.82667	0.0640925	0.00542654	-0.229309	106.1	5.8	79.9	2.4	744	90		78.2	2.3		-32.791	-831.164
21CM50a-4	113.944	2.74698		81.2445	3.57475	0.0617676	0.00990018	0.156892	101.2	7.7	78.9	1.7	665	172		77.5	1.7		-28.2636	-742.839
21CM50a-7	66.4324	1.84237		83.396	3.6924	0.0434309	0.0107693	0.181216	70.38	8.29	76.84	1.69	0.00016	287.85		77.24	1.7		8.40708	99.9998
21CM50a-16	62.5366	2.01995		83.504	3.29512	0.052521	0.00708053	0.599824	84.4	4.7	76.7	1.5	307	154		76.3	1.5		-10.0391	-300.261
21CM50a-3	44.3913	1.91062		82.9062	3.07056	0.0587669	0.00622934	0.186962	94.6	4.8	77.3	1.4	557	116		76.2	1.4		-22.3803	-620.569
21CM50a-8	50.5437	1.4246		81.9083	5.22164	0.0709441	0.00808359	0.0121899	114.5	7	78.2	2.5	955	117		75.9	2.4		-46.4194	-1121.23
21CM50a-4.c	502.101	4.08325		84.4111	2.63299	0.0485047	0.00275345	0.0871864	77.39	2.32	75.92	1.18	122.9	66.9		75.83	1.18		-1.93625	-61.8809
21CM50a-5	52.9262	1.81397		81.5568	4.24516	0.080338	0.00931823	0.393531	129.3	6.5	78.6	2	1204	114		75.3	1.9		-64.5038	-1431.81
21CM50a-15	50.0053	2.0976		84.3587	3.86779	0.0576245	0.00581964	0.09604	91.4	4.7	76	1.7	515	111		75	1.7		-20.2632	-577.632
21CM50a-1	55.6384	2.0839		85.3471	3.44779	0.0500053	0.0146082	0.315713	78.8	10.7	75.09	1.51	194	340		74.86	1.5		-4.94074	-158.357
21CM50a-4.r	84.0645	2.05804		89.2846	4.86832	0.0579157	0.0112526	0.0866778	86.94	8.22	71.8	1.95	526	213		70.86	1.92		-21.0864	-632.591
21CM50b-26	286.792	2.35776		3.87746	0.230157	0.0998616	0.00510689	0.241314	1538.3	27.1	1479.1	39.2	1620.7	47.6		1467	38.9		-4.00243	-9.57339
21CM50b-10	41.584	5.0165		4.45934	0.449067	0.124774	0.0069307	-0.269604	1604.6	51.4	1304.3	59.5	2024.8	49.2		1244.4	57		-23.0238	-55.2404
21CM50b-24	195.318	2.00421		15.5573	0.734956	0.0526554	0.00301235	0.0904612	388.7	11.4	401.59	9.2	313	65.1		402.62	9.22		3.20974	22.0598
21CM50b-7	772.201	6.98106		15.9624	2.49762	0.0785448	0.00630242	-0.500804	526	43	392	30	1160	80		380	29		-34.1837	-195.918
21CM50b-20	378.508	2.47465		27.4495	1.57504	0.0544335	0.0044205	0.204974	245.33	9.73	230.67	6.5	388	91.2		229.63	6.47		-6.3554	-68.2057
21CM50b-9	125.392	2.14033		49.2767	2.59756	0.0426029	0.00817997	0.992887	114.3	7.56	129.51	3.38	0.00015	226.483		130.49	3.4		11.7443	99.9999
21CM50b-39	329.826	3.20477		49.2301	1.84065	0.0473724	0.00284894	0.0947514	126.45	4.03	129.63	2.4	67	71.6		129.84	2.4		2.45314	48.3144
21CM50b-33	349.577	2.23478		50.2349	1.63557	0.0455383	0.00419218	0.219011	119.53	5.11	127.06	2.05	0.00016	109.709		127.55	2.06		5.92633	99.9999
21CM50b-11	572.07	12.697		50.7157	2.1745	0.0531373	0.00362453	0.0399462	136.95	5.07	125.87	2.67	333.6	77.3		125.15	2.66		-8.80273	-165.035
21CM50b-34	275.583	2.69385		52.9765	1.99305	0.0444602	0.00416758	0.277897	111.13	4.78	120.55	2.25	0.00015	114.745		121.15	2.26		7.81418	99.9999
21CM50b-16	278.251	2.2341		52.6671	2.62704	0.0496662	0.00493389	-0.00647815	124.07	6.51	121.25	3	178	116		121.12	2.99		-2.32577	-46.8041
21CM50b-37	303.162	3.72209		52.758	1.85907	0.0486771	0.00551163	0.0697171	121.54	6.66	121.04	2.11	131	133		121.01	2.11		-0.413087	-8.22868
21CM50b-3	343.55	2.26289		53.8258	1.92978	0.0482258	0.00361685	0.0920593	118.22	4.47	118.67	2.11	109.3	88.6		118.69	2.11		0.379203	7.89585
21CM50b-15	333.312	2.37568		54.2167	2.86916	0.0476371	0.00446934	0.0316781	116.06	5.83	117.82	3.09	80.2	111.4		117.93	3.09		1.4938	31.9301
21CM50b-1	362.414	1.9002		54.1335	2.10867	0.0492293	0.00447729	-0.154807	119.89	5.9	118	2.28	158	106		117.88	2.27		-1.60169	-33.8983
21CM50b-13	187.265	2.12015		54.3605	2.58432	0.0462978	0.00519179	0.0485189	112.69	6.38	117.51	2.77	12.1	134.8		117.82	2.78		4.10178	89.703
21CM50b-36	319.154	2.56905		54.4821	1.26845	0.0471339	0.00423219	0.325633	114.37	4.6	117.25	1.35	54.9	107.1		117.43	1.35		2.45629	53.177
21CM50b-5	176.016	2.53504		55.0803	2.07288	0.0475705	0.00508947	0.193446	114.19	5.74	115.99	2.16	76.9	127.1		116.1	2.17		1.55186	33.7012
21CM50b-30	266.416	2.33578		56.1098	3.2728	0.0485073	0.0044826	0.290698	114.3	5.07	113.88	3.29	123	109		113.85	3.29		-0.368809	-8.00843
21CM50b-2	239.634	2.2612		58.2879	5.38696	0.0495374	0.00562262	0.151942	112.46	7.19	109.66	5.02	172	132		109.48	5.02		-2.55335	-56.8484
21CM50b-18	700.454	12.0799		59.3582	2.65453	0.0492969	0.00365489	0.261975	110.03	3.96	107.7	2.39	160.9	86.7		107.55	2.38		-2.16342	-49.3965
21CM50b-28	433.393	9.54603		60.2331	3.43101	0.049663	0.00559872	0.290405	109.28	5.73	106.15	3	178	131		105.95	2.99		-2.94866	-67.6872
21CM50b-19	98.814	3.2357		60.9095	3.82968	0.0422197	0.00736076	0.184964	92.64	7.71	104.98	3.27	0.00015	182.657		105.75	3.3		11.7546	99.9999
21CM50b-32	307.324	4.80048		61.288	3.36421	0.048728	0.0048369	0.441554	105.58	4.5	104.33	2.84	134	117		104.25	2.84		-1.19812	-28.4386
21CM50b-4	342.382	5.48089		62.2403	5.59893	0.0490337	0.00439481	0.100127	104.66	5.99	102.75	4.58	148	105		102.63	4.58		-1.85888	-44.0389
21CM50b-31	68.8501	5.04322		63.4667	4.93589	0.0577321	0.0184927	0.288803	119.9	17.4	100.78	3.89	519	352		99.56	3.84		-18.972	-414.983
21CM50b-14	265.315	2.00038		66.3979	3.07082	0.0497734	0.00563704	0.14193	99.83	5.52	96.36	2.21	183	132		96.15	2.21		-3.60108	-89.9128
21CM50b-25	158.539	8.00627		67.2466	4.00007	0.0456527	0.00764198	0.303153	90.82	6.94	95.16	2.81	0.00016	205.278		95.43	2.82		4.56074	99.9998
21CM50b-35	34.3772	2.22221		70.0317	5.51905	0.0469837	0.021516	0.00122737	89.8	20	91.4	3.58	47.3	547		91.5	3.58		1.75055	48.2495
21CM50b-12	179.821	3.02475		70.2213	2.94427	0.0469732	0.0067076	0.119569	89.54	6.17	91.15	1.9	46.8	170.6		91.25	1.9		1.76632	48.6561
21CM50b-1	118.721	2.64591		68.0571	3.00575	0.0816086	0.0242702	-0.259173	155	22	94	2.1	1235	292		91.2	2		-64.8936	-1213.83
21CM50b-22	272.008	3.14272		69.1846	7.45873	0.0667526	0.0134815	0.154204	126.8	12.7	92.51	4.95	829	211		90.32	4.83		-37.0663	-796.119
21CM50b-29	43.8941	2.02716		71.7891	5.50017	0.0506122	0.0181642	0.200255	94.2	15.8	89.18	3.39	222	415		88.86	3.38		-5.62906	-148.935
21CM50b-27	93.5881	2.78291		72.3797	4.48205	0.0479906	0.0126286	0.113249	88.8	11.2	88.45	2.72	97.7	311.4		88.43	2.72		-0.395704	-10.4579
21CM50b-21	40.1127	1.98065		73.763	6.4789	0.0401175	0.0214151	0.213777	73.4	18.5	86.81	3.79	0.00014	606.737		87.64	3.82		15.4475	99.9998
21CM50b-23	35.2454	1.92161		74.9503	5.12161	0.035693	0.0213785	0.0771373	64.5	18.7	85.44	2.9	0.00017	532.392		86.73	2.94		24.5084	99.9998
21CM50b-4	199.675	3.51804		75.0907	3.91387	0.0461674	0.00294013	0.207217	82.6	2.9	85.3	2.2	5.3	76.7		85.4	2.2		3.1653	93.7866
21CM50b-2	109.464	2.26308		74.6342	3.851	0.0536705	0.00482082	0.132727	96	4.5	85.8	2.2	356	101		85.2	2.2		-11.8881	-314.918
21CM50b-6	36.2892	1.62787		75.614	4.17549	0.0607787	0.0246239	0.0164392	106.7	20.7	84.7	2.32	630	436		83.31	2.29		-25.974	-643.802
21CM50b-8	36.4809	1.71209		77.2027	5.62292	0.0532466	0.0198582	0.0847222	92.2	16.5	82.96	3	338	422		82.39	2.98		-11.1379	-307.425
21CM50b-7	547.404	7.922		78.4521	3.2445	0.0527641	0.00304318	0.243885	90.01	2.68	81.65	1.68	317.6	65.6		81.13	1.67		-10.2388	-288.977
21CM50b-38	45.5227	1.80819		76.7567	3.99961	0.0709918	0.0231174	0.0729254	121.8	18.7	83.44	2.16	956	333		81	2.1		-45.9732	-1045.73
21CM50b-5	39.7312	1.66905		80.7574	5.53939	0.0528395	0.0076923	0.240984	87.7	6.1	79.3	2.7	321	165		78.8	2.7		-10.5927	-304.792
21CM50b-17	42.2272	2.08923		82.2018	7.62739	0.0453856	0.0240625	0.0670871	74.5	19.1	77.95	3.59	0.00015	673.41		78.16	3.6	74.952	4.42591	99.9998
21CM50b-6	104.679	2.15297		82.7375	3.68364	0.0486686	0.0052249	0.126727	79.1	4.2	77.4	1.7	131	126		77.3	1.7		-2.19638	-69.2506
21CM50b-8	48.745	2.07279		84.4954	5.72468	0.0500902	0.00665124	0.281953	79.7	5	75.8	2.6	198	154		75.6	2.5		-5.14512	-161.214
21CM50b-3	265.708	4.73245		87.3943	4.83223	0.0486412	0.00344579	0.464942	75	2.4	73.3	2	130	83		73.2	2		-2.31924	-77.3533
21CM50b-4.2	53.6087	1.69894		87.6878	4.86882	0.0762743	0.00850639	0.395186	115	5.6	73.1	2	1101	112		70.5	1.9		-57.3187	-1406.16
13SGM34-3	35.1149	5.16619		87.8294	3.99855	0.0599683	0.00857203	0.21444	91.32	6.13	72.98	1.65	602	155		71.8	6.2		-25.1302	-724.884
13SGM34-6	53.9731	4.30555		86.0221	3.34538	0.0562506	0.0040072	0.190124	87.61	3.12	74.51	1.44	461.3	79		73.7	3.1		-17.5815	-519.112
13SGM34-11	50.0223	4.934		85.3551	3.4335	0.0555857	0.00617853	0.16638	87.28	4.67	75.09	1.5	435	124		74.3	4.7		-16.2339	-479.305
13SGM34-5	43.6081	2.71872		85.0923	4.10581	0.0538393	0.00593599	0.108226	84.89	4.7	75.32	1.81	363	124		74.7	4.7		-12.7058	-381.944
13SGM34-10	34.0993	5.71666		84.3642	5.58168	0.0590543	0.00713657	0.169952	93.51	5.7	75.96	2.5	568	132		74.9	5.6		-23.1043	-647.762
13SGM34-4	35.3522	5.30532		83.0494	3.54976	0.0602514	0.00977357	0.0648423	96.76	7.61	77.16	1.64	612	175		75.9	7.7		-25.4018	-693.157
13SGM34-16	32.592	5.96666		82.2795	3.44578	0.0655269	0.00718862	0.139454	105.75	5.62	77.88	1.62	790	115		76.1	5.7		-35.7858	-914.381
13SGM34-23	21.047	8.35737		82.2316	4.17473	0.0650003	0.0123874	0.20224	104.99	9.33	77.92	1.97	773	201		76.2	9.6		-34.7408	-892.043
13SGM34-19	20.4576	7.34578		83.8839	3.91014	0.0488405	0.00847709	0.375739	78.37	6.11	76.39	1.77	139	204		76.3	6.1		-2.59196	-81.961
13SGM34-2	29.6538	5.32751		82.4204	3.47098	0.0551867	0.00898085	0.182194	89.63	6.88	77.74	1.63	419	182		77	7		-15.2946	-438.976
13SGM34-22	24.2951	6.55032		82.3196	3.17403	0.053896	0.0104666	0.124839	87.73	8.12	77.84	1.49	366	219		77.2	8.2		-12.7055	-370.195
13SGM34-20	36.9541	6.02104		82.09	3.30309	0.0525692	0.00777148	0.0324051	85.88	6.26	78.05	1.56	309	168		77.6	6.3		-10.032	-295.9
13SGM34-7	31.5145	4.34819		81.0635	3.54973	0.0588098	0.00674121	0.0296798	96.76	5.61	79.04	1.72	559	125		77.9	5.6		-22.419	-607.237
13SGM34-15	15.8872	8.2792		80.637	3.99407	0.0586267	0.0145505	0.144863	97	11.4	79.45	1.96	552	271		78	12		-22.0894	-594.777
13SGM34-26	25.0255	6.22401		81.1896	2.8354	0.0531275	0.00931814	0.143939	87.68	7.3	78.91	1.37	333	199		78.4	7.4		-11.1139	-322
13SGM34-1	21.2672	5.14336		80.35	3.45617	0.0635705	0.0112839	-0.0836385	105.08	9.29	79.73	1.7	726	188		78.6	9.4		-31.7948	-810.573
13SGM34-8	24.0336	6.19685		80.2508	3.72159	0.0546902	0.010383	0.429333	91.15	7.63	79.83	1.84	399	213		79.1	7.8		-14.1801	-399.812
13SGM34-9	25.3694	5.48498		79.948	3.7425	0.0566261	0.0105161	0.172761	94.58	8.29	80.13	1.86	476	205		79.2	8.4		-18.0332	-494.035
13SGM34-13	22.4529	6.33941		80.2771	2.7248	0.0531722	0.0113953	0.0214931	88.7	9.19	79.81	1.35	335	243		79.3	9.3		-11.139	-319.747
13SGM34-21	24.2042	6.48794		79.2185	3.42557	0.0593895	0.00942166	0.199128	99.84	7.41	80.87	1.74	580	172		79.7	7.5		-23.4574	-617.2
13SGM34-12	14.3157	8.48627		78.6386	3.56297	0.0619989	0.0176754	-0.104654	104.7	14.6	81.46	1.83	673	305		80	15		-28.5293	-726.172
13SGM34-24	40.3728	3.82007		79.5272	2.82954	0.0498427	0.00671039	0.158888	84.12	5.4	80.55	1.42	186	157		80.3	5.4		-4.43203	-130.912
13SGM34-18	16.89	8.81057		77.1154	3.04003	0.05659	0.0130855	-0.0201472	97.8	11	83.06	1.63	475	256		82	11		-17.7462	-471.876
13SGM34-14	22.2376	5.53846		76.2704	3.47479	0.0648119	0.0134844	-0.024842	112.4	11.4	83.97	1.9	767	219		83	12		-33.8573	-813.421
13SGM34-17	27.8573	4.61043		76.8143	3.72149	0.0508299	0.00759298	0.313243	88.62	6.02	83.38	2.01	232	172		83.1	6.1		-6.28448	-178.244
13SGM34-25	19.8569	7.97123		76.0143	3.89772	0.0471598	0.0105824	0.138282	83.31	8.92	84.25	2.15	56.3	267.5		84.3	8.9		1.11573	33.1751
13SGM37-43	93.3826	4.4915		80.2066	5.39011	0.0525822	0.00455958	0.151099	87.83	4.26	79.88	2.67	309.7	98.7		79.4	4.2		-9.95243	-287.707
13SGM37-5	34.5389	11.7361		78.6725	3.06924	0.0493462	0.00570255	0.06362	84.19	4.83	81.42	1.58	163	135		81.3	4.8		-3.40211	-100.197
13SGM37-17	217.795	2.40802		77.9052	2.98582	0.0545965	0.0029105	-0.112217	93.62	3.09	82.22	1.57	394.9	59.8		81.5	3		-13.8652	-380.297
13SGM37-36	159.432	6.01006		77.5244	4.9464	0.0592367	0.00974346	-0.0477839	101.67	8.67	82.62	2.62	575	179		81.8	8.6		-23.0574	-595.957
13SGM37-37	33.7575	7.58321		76.8378	4.03111	0.0564961	0.00811561	0.197951	98.01	6.68	83.36	2.17	471	159		82.4	6.7		-17.5744	-465.019
13SGM37-21	49.0731	4.77672		77.0297	3.44294	0.0529608	0.00583036	0.165445	91.92	4.91	83.15	1.85	326	125		82.6	4.9		-10.5472	-292.063
13SGM37-22	141.634	3.92045		77.0447	3.6214	0.0507889	0.00334997	0.192485	88.3	3.1	83.13	1.94	230.3	76.2		82.8	3.1		-6.21917	-177.036
13SGM37-31	135.958	4.0814		76.6699	3.52255	0.0528851	0.00253293	0.446859	92.22	2.17	83.54	1.91	323.1	54.3		83	2.1		-10.3902	-286.761
13SGM37-13	755.417	4.8507		76.8291	3.86248	0.0492022	0.00222325	0.140544	85.88	2.58	83.36	2.08	156.3	52.8		83.2	2.5		-3.02303	-87.5
13SGM37-27	233.517	4.81439		76.4733	2.29022	0.0509855	0.00264219	0.19067	89.27	2.33	83.75	1.25	239.3	59.7		83.4	2.3		-6.59104	-185.731
13SGM37-16	169.316	3.37686		75.7516	3.56045	0.051067	0.00422595	-0.115219	90.21	4.31	84.54	1.97	243	95.4		84.2	4.3		-6.70688	-187.438
13SGM37-6	146.694	1.73252		74.9241	2.951	0.0532043	0.00295937	0.167527	94.8	2.83	85.47	1.67	336.3	63		84.9	2.8		-10.9161	-293.471
13SGM37-38	126.836	3.52783		74.4214	2.73962	0.0500758	0.00424646	0.468922	90.05	3.23	86.04	1.57	197.7	98.6		85.8	3.2		-4.66062	-129.777
13SGM37-48	140.856	2.5457		74.0843	3.27142	0.0524557	0.00307612	0.075327	94.55	3.19	86.43	1.9	304.5	66.9		85.9	3.1		-9.39489	-252.308
13SGM37-33	349.562	2.77475		74.0562	3.56418	0.0512756	0.00217006	0.428773	92.55	2.15	86.47	2.07	252.4	48.7		86.1	2.1		-7.03134	-191.893
13SGM37-30	96.5979	4.39027		73.9066	2.59306	0.0517976	0.00353878	0.41217	93.63	2.8	86.64	1.51	275.6	78.3		86.2	2.8		-8.06787	-218.098
13SGM37-42	117.03	2.40496		73.9119	3.81444	0.0484357	0.00278094	0.210913	87.8	2.89	86.63	2.22	119.8	67.6		86.6	2.9		-1.35057	-38.2893
13SGM37-47	170.413	2.12404		73.0933	3.42133	0.0505133	0.00230037	-0.0182486	92.37	2.91	87.6	2.04	217.5	52.7		87.4	2.8		-5.44521	-148.288
13SGM37-40	529.133	2.62544		72.6904	3.50985	0.0523528	0.00201776	0.142644	96.09	2.63	88.08	2.11	299.7	44		87.6	2.5		-9.09401	-240.259
13SGM37-1	161.073	16.3443		72.5626	3.11349	0.0527594	0.00232088	0.0403128	96.97	2.78	88.23	1.88	317.5	50		87.7	2.7		-9.90593	-259.855
13SGM37-28	161.724	2.97935		72.2771	2.50271	0.0520106	0.00458963	-0.194944	96.01	4.62	88.58	1.52	285	101		88.1	4.6		-8.3879	-221.743
13SGM37-15	103.402	3.04805		70.9087	2.6532	0.0637101	0.00700127	-0.363205	118.54	7.18	90.28	1.68	731	116		88.5	7.1		-31.3026	-709.703
13SGM37-19	72.1888	3.8226		70.8413	2.78115	0.0642561	0.00458117	0.407457	119.61	3.72	90.36	1.76	749.2	75.3		88.5	3.8		-32.3705	-729.128
13SGM37-24	94.9383	4.56437		71.7373	2.15315	0.052316	0.00242244	-0.0903884	97.25	2.66	89.24	1.33	298.4	52.8		88.9	2.6		-8.9758	-234.379
13SGM37-9	263.66	2.53089		71.4807	3.74927	0.0502112	0.00206027	0.355742	93.82	2.41	89.56	2.33	203.7	47.6		89.3	2.3		-4.75659	-127.445
13SGM37-18	163.244	3.45241		71.4083	3.94218	0.0512327	0.0025224	0.093501	95.74	3.22	89.65	2.46	250.2	56.6		89.3	3.1		-6.79308	-179.085
13SGM37-23	128.155	13.6421		71.3943	2.92724	0.0511228	0.00265284	0.410448	95.56	2.34	89.67	1.83	245.2	59.7		89.3	2.3		-6.56853	-173.447
13SGM37-39	322.993	3.3032		71.2648	2.70631	0.0511941	0.00319835	0.447557	95.85	2.6	89.83	1.69	248.4	71.9		89.4	2.6		-6.70155	-176.522
13SGM37-26	164.249	8.9087		71.0129	2.98602	0.0496037	0.00307604	0.0627784	93.32	3.24	90.14	1.88	175.2	72.4		89.9	3.2		-3.52785	-94.3643
13SGM37-34	426.869	4.9893		70.8718	5.24074	0.0514616	0.00237574	-0.0591343	96.84	4.13	90.32	3.32	260.5	53.1		89.9	3.9		-7.21878	-188.419
13SGM37-4	228.349	1.50137		70.91	2.65907	0.0490062	0.00245403	0.280045	92.39	2.36	90.27	1.68	147.3	58.6		90.1	2.3		-2.34851	-63.1771
13SGM37-35	441.941	4.22645		70.9576	3.76212	0.0485609	0.00237974	0.0552731	91.52	3.07	90.21	2.37	125.6	57.7		90.1	3		-1.45217	-39.2307
13SGM37-45	443.646	3.08821		70.663	3.2788	0.0501701	0.00248004	0.102252	94.79	2.91	90.59	2.09	201.8	57.4		90.3	2.9		-4.63627	-122.762
13SGM37-41	275.689	3.16369		70.674	2.28547	0.049569	0.00302986	0.477016	93.69	2.41	90.57	1.45	173.8	71.3		90.4	2.4		-3.44485	-91.8958
13SGM37-46	266.862	3.86553		69.9007	3.1231	0.0481691	0.00206517	0.534632	92.13	1.86	91.57	2.03	106.6	50.8		91.5	1.9		-0.611554	-16.4137
13SGM37-44	382.36	3.84559		69.5892	3.5175	0.0510232	0.00221446	0.292944	97.74	2.61	91.98	2.31	240.7	49.9		91.6	2.5		-6.26223	-161.687
13SGM37-8	386.943	2.37082		69.5094	4.10575	0.0494787	0.00188681	0.176545	95.03	2.92	92.08	2.7	169.6	44.6		91.9	2.9		-3.20374	-84.1877
13SGM37-10	246.645	3.58367		69.3057	3.15975	0.0508885	0.00270036	0.353661	97.88	2.63	92.35	2.09	234.8	61.2		92	2.6		-5.98809	-154.25
13SGM37-29	524.284	2.28347		69.3886	3.32978	0.0501263	0.00195666	0.334743	96.38	2.33	92.24	2.2	200	45.4		92	2.3		-4.48829	-116.826
13SGM37-20	222.149	2.58853		69.3019	2.47227	0.0499536	0.00198459	-0.147131	96.16	2.62	92.35	1.64	191.6	46.1		92.1	2.6		-4.12561	-107.472
13SGM37-25	375.958	3.5645		69.1639	3.57393	0.0493061	0.00193419	-0.0801242	95.17	3.06	92.54	2.37	161.5	45.8		92.4	3		-2.84201	-74.5191
13SGM37-14	187.498	1.69629		67.8942	2.4487	0.0536448	0.00262941	0.277317	104.94	2.6	94.26	1.69	355	55.4		93.6	2.5		-11.3304	-276.618
13SGM37-32	115.943	2.07796		67.1504	3.24984	0.0548694	0.00536799	0.105028	108.35	5.37	95.29	2.29	406	110		94.5	5.3		-13.7055	-326.068
13SGM37-12	302.159	2.38479		67.1437	2.36131	0.0499417	0.00198851	0.394532	99.09	1.96	95.3	1.66	191.2	46.3		95.1	1.9		-3.97692	-100.63
13SGM37-3	347.366	2.58572		66.1528	3.07968	0.0488384	0.0019563	-0.111752	98.39	3.04	96.72	2.23	139.1	47.1		96.6	3		-1.72663	-43.8172
13SGM37-2	261.706	3.14125		65.2124	2.92574	0.0496269	0.00172398	0.171107	101.28	2.5	98.1	2.18	176.7	40.4		97.9	2.4		-3.24159	-80.1223
13SGM37-7	341.884	2.62956		64.6562	3.81128	0.0486214	0.00192084	0.464012	100.13	2.56	98.94	2.89	128.5	46.5		98.9	2.5		-1.20275	-29.8767
13SGM37-11	222.254	5.30168		9.19309	1.13642	0.087173	0.00378882	-0.493959	848.7	43.1	665.6	39.1	1363.4	41.9		646	39		-27.509	-104.838
12SGM27-1	248.045	1.25237		72.7543	2.87359	0.0492467	0.00221862	0.228005	90.57	2.28	88	1.73	158.7	52.7		87.8	2.3		-2.92045	-80.3409
12SGM27-2	326.563	1.00579		69.7469	2.21227	0.0511709	0.00180832	-0.0784068	97.8	2.3	91.77	1.45	247.5	40.7		91.4	2.2		-6.57077	-169.696
12SGM27-3	191.127	0.962867		75.1768	2.51094	0.0494197	0.00267587	0.141516	88.06	2.51	85.18	1.41	166.8	63.4		85	2.5		-3.38108	-95.8206
12SGM27-4	300.252	1.28679		68.7799	1.89436	0.0504332	0.00233652	0.595561	97.74	1.74	93.05	1.27	213.8	53.7		92.8	1.7		-5.0403	-129.769
12SGM27-5	133.144	1.72382		74.967	2.33007	0.0508404	0.00343151	0.467683	90.72	2.59	85.42	1.32	232.5	77.9		85.1	2.6		-6.20464	-172.185
12SGM27-6	178.93	1.21477		75.4032	3.14162	0.0507197	0.00332216	0.429522	90.02	2.61	84.93	1.76	227.1	75.6		84.6	2.6		-5.99317	-167.397
12SGM27-7	353.09	1.05897		69.5986	2.73293	0.051168	0.00189043	0.593785	98	1.61	91.96	1.79	247.5	42.5		91.6	1.6		-6.56807	-169.139
12SGM27-8	292.688	1.17533		74.3476	3.51326	0.0500623	0.00203641	0.239829	90.1	2.35	86.13	2.02	196.7	47.3		85.9	2.3		-4.60931	-128.376
12SGM27-9	293.546	2.26117		73.9996	2.54514	0.0480802	0.00185273	-0.0972528	87.08	2.26	86.53	1.48	102.1	45.5		86.5	2.2		-0.635618	-17.9938
12SGM27-10	281.904	1.47214		72.2829	3.43334	0.0529335	0.00265717	0.327134	97.62	2.64	88.57	2.09	324.8	57.1		88	2.5		-10.2179	-266.716
12SGM27-11	265.062	1.05432		71.34	3.09635	0.0506073	0.00268357	0.264591	94.72	2.66	89.73	1.93	222.1	61.2		89.4	2.6		-5.56113	-147.52
12SGM27-12	390.569	1.18572		73.0069	3.62798	0.0514329	0.00285795	0.262493	94.08	2.88	87.7	2.16	259.1	63.9		87.3	2.8		-7.2748	-195.439
12SGM27-13	268.388	2.59315		74.4364	3.12243	0.0500212	0.00236804	0.338134	89.93	2.22	86.03	1.79	194.9	55.1		85.8	2.2		-4.5333	-126.549
12SGM27-14	887.924	5.0598		71.9608	3.01156	0.0493844	0.00265411	0.535835	91.75	2.07	88.97	1.85	164.9	62.7		88.8	2.1		-3.12465	-85.3434
12SGM27-15	292.757	1.23494		75.4588	4.3052	0.0500304	0.00278866	0.433512	88.78	2.55	84.87	2.41	195.3	64.8		84.6	2.5		-4.60705	-130.117
12SGM27-16	169.794	1.22441		74.2558	4.84324	0.0495485	0.003442	0.174008	89.33	3.7	86.23	2.79	172.9	81		86	3.6		-3.59504	-100.51
12SGM27-17	377.022	1.36181		69.9388	3.27187	0.0475463	0.00262404	0.49649	90.94	2.25	91.52	2.13	75.9	65.5		91.6	2.2		0.633741	17.0673
12SGM27-18	162.223	1.69397		74.6031	2.7697	0.0506962	0.00243124	0.108366	90.91	2.49	85.84	1.58	226.2	55.4		85.5	2.5		-5.90634	-163.514
12SGM27-19	383.058	1.83274		70.0958	3.38248	0.0473637	0.00290045	0.391275	90.4	2.65	91.32	2.19	66.3	72.9		91.4	2.7		1.00745	27.3982
12SGM27-20	138.003	1.35175		74.8496	3.33871	0.0516656	0.00288266	0.0989848	92.28	2.99	85.55	1.9	269.8	63.9		85.1	2.9		-7.86674	-215.371
12SGM27-21	304.212	1.25013		71.3876	2.81374	0.0498105	0.00267271	0.279206	93.23	2.54	89.68	1.76	185.1	62.4		89.5	2.5		-3.95852	-106.401
12SGM27-22	301.516	2.16189		72.3102	3.50282	0.0477814	0.00269723	0.388941	88.5	2.47	88.54	2.13	87.3	67		88.5	2.5		0.0451773	1.4005
12SGM27-23	381.084	1.48431		72.694	3.45892	0.0495982	0.00253653	0.530591	91.26	2.09	88.07	2.08	175.2	59.7		87.9	2.1		-3.62212	-98.9327
12SGM27-24	281.026	1.63025		75.2588	3.07837	0.0488672	0.00260317	0.264382	87.03	2.41	85.09	1.73	140.5	62.5		85	2.4		-2.27994	-65.1193
12SGM27-25	108.422	1.55637		71.7663	3.21943	0.0485977	0.00314425	0.514622	90.6	2.45	89.21	1.99	127.5	76		89.1	2.4		-1.55812	-42.9212
12SGM27-26	415.704	1.54225		71.9522	3.16342	0.0514731	0.00258938	0.355322	95.47	2.45	88.98	1.94	260.9	57.8		88.6	2.4		-7.29377	-193.212
12SGM27-27	156.408	1.97019		70.9047	2.71355	0.0492628	0.00254041	0.17261	92.84	2.6	90.28	1.72	159.2	60.3		90.1	2.6		-2.83562	-76.3403
12SGM27-28	347.785	1.61833		71.9285	2.67676	0.0491283	0.00302319	0.345543	91.35	2.61	89.01	1.64	153	72		88.9	2.6		-2.62892	-71.8908
12SGM27-29	191.946	1.57992		72.6756	4.33791	0.0508477	0.00489664	0.461312	93.47	3.88	88.1	2.61	233	111		87.8	3.9		-6.09535	-164.472
12SGM27-30	132.884	1.54793		70.2024	4.9919	0.0507198	0.00346026	0.30474	96.38	3.78	91.18	3.22	227.1	78.8		90.9	3.7		-5.70301	-149.068
12SGM27-31	197.121	1.37012		69.2221	6.10573	0.0539769	0.00654598	0.360786	103.65	5.99	92.46	4.05	369	137		91.8	5.9		-12.1025	-299.091
12SGM27-32	368.245	2.34936		73.6241	4.7097	0.0482582	0.00306782	0.462712	87.82	2.78	86.97	2.76	111	75.1		86.9	2.8		-0.977349	-27.6302
12SGM25-50	982.909	5.05799		76.491	3.26299	0.0560084	0.00406923	-0.269916	97.62	4.36	83.73	1.77	451.8	80.7		82.9	4.2		-16.589	-439.592
12SGM25-35	8627.75	15.2855		75.6378	3.30695	0.0581693	0.00235265	0.183838	102.29	2.62	84.67	1.84	535.2	44.2		83.6	2.4		-20.8102	-532.101
12SGM25-27	671.195	2.93492		76.2619	3.61704	0.0482687	0.00210027	0.503795	84.92	1.85	83.98	1.98	111.5	51.3		83.9	1.8		-1.11931	-32.7697
12SGM25-14	694.223	2.23122		74.6004	2.50679	0.0509631	0.00240911	0.193623	91.36	2.29	85.84	1.43	238	54.5		85.5	2.3		-6.43057	-177.26
12SGM25-23	1361.29	2.72382		74.2937	2.99921	0.0484254	0.00191238	0.320862	87.35	1.95	86.19	1.73	119.3	46.5		86.1	1.9		-1.34586	-38.4151
12SGM25-65	1097.33	3.12751		74.4405	3.87454	0.0470294	0.00213508	0.684756	84.77	1.59	86.02	2.22	49.7	54.3		86.1	1.6		1.45315	42.2227
12SGM25-52	1391.59	2.43086		74.2369	3.54267	0.0476199	0.00181943	0.205148	86.02	2.25	86.26	2.04	79.4	45.4		86.3	2.3		0.278229	7.9527
12SGM25-32	488.652	2.32789		73.2917	4.09779	0.0560002	0.00290027	0.435778	101.66	2.77	87.36	2.43	451.4	57.5		86.5	2.6		-16.369	-416.712
12SGM25-36	839.068	2.29849		73.5724	2.85847	0.0512699	0.00214136	0.469743	93.11	1.85	87.03	1.68	252	48		86.6	1.8		-6.9861	-189.555
12SGM25-4	1102.1	2.25043		73.4527	2.92248	0.048331	0.00136714	0.152	88.14	1.91	87.17	1.72	114.4	33.4		87.1	1.9		-1.11277	-31.2378
12SGM25-26	1042.77	4.09718		73.6577	2.71682	0.0458018	0.00117535	0.345812	83.48	1.48	86.93	1.59	0.00018	29.1996		87.1	1.5		3.96871	99.9998
12SGM25-1	836.558	2.36946		73.2642	2.38327	0.0487006	0.00143804	0.201461	89	1.67	87.39	1.41	132.4	34.8		87.3	1.7		-1.84232	-51.5047
12SGM25-34	369.859	3.90377		73.2392	2.5581	0.04904	0.00216833	0.104474	89.63	2.29	87.42	1.52	148.7	51.9		87.3	2.3		-2.52803	-70.0984
12SGM25-17	2037.66	6.95777		73.0283	3.247	0.0504901	0.00216859	0.573362	92.41	1.78	87.67	1.94	216.6	49.8		87.4	1.7		-5.40664	-147.063
12SGM25-66	890.425	2.2281		72.7885	3.65851	0.0501618	0.00340413	0.172076	92.13	3.4	87.96	2.2	201.4	78.7		87.7	3.4		-4.74079	-128.968
12SGM25-30	1180.06	2.29335		72.66	3.45943	0.0494963	0.00156781	0.365697	91.12	2.03	88.12	2.08	170.5	37		87.9	2		-3.40445	-93.4862
12SGM25-31	289.487	2.12994		72.61	2.66754	0.050209	0.00234845	0.347063	92.43	2.14	88.18	1.61	203.7	54.3		87.9	2.1		-4.81969	-131.005
12SGM25-45	1802.27	3.85695		71.3784	2.95126	0.0636555	0.00206718	0.177261	117.71	2.66	89.69	1.84	729.4	34.5		87.9	2.3		-31.2409	-713.246
12SGM25-29	1146.17	2.10207		72.7528	2.37914	0.0478929	0.00164475	0.344784	88.17	1.62	88	1.43	92.8	40.6		88	1.6		-0.193182	-5.45455
12SGM25-61	736.083	3.05127		72.6513	2.86279	0.0462293	0.00218474	0.434873	85.36	1.9	88.13	1.72	8.55	56.74		88.3	1.9		3.14308	90.2984
12SGM25-33	771.902	1.96718		72.4101	2.81198	0.0477185	0.00174937	0.25405	88.27	1.95	88.42	1.71	84.3	43.5		88.4	2		0.169645	4.65958
12SGM25-63	859.491	2.67451		71.6369	3.00029	0.05504	0.00343131	0.392364	102.2	2.91	89.37	1.86	412.8	69.7		88.6	2.9		-14.356	-361.9
12SGM25-21	868.033	2.22191		72.0218	4.29172	0.0496615	0.00221386	0.293681	92.18	2.78	88.89	2.63	178.1	51.9		88.7	2.7		-3.7012	-100.36
12SGM25-62	1244.61	2.96304		72.2165	3.23832	0.0470493	0.00191509	0.450701	87.31	1.88	88.65	1.97	50.7	48.7		88.7	1.9		1.51156	42.8088
12SGM25-46	943.209	1.92841		72.0392	2.91956	0.0488476	0.00215987	0.177699	90.72	2.36	88.87	1.79	139.6	51.9		88.8	2.3		-2.08169	-57.0834
12SGM25-48	503.25	3.01369		70.0468	3.31619	0.0702488	0.00200569	-0.0674002	131.46	3.51	91.38	2.15	934.7	29.3		88.8	2.8		-43.8608	-922.872
12SGM25-12	1700.56	2.5653		71.9738	3.3377	0.0481592	0.00155459	0.155155	89.57	2.24	88.95	2.05	106.1	38		88.9	2.2		-0.697021	-19.2805
12SGM25-40	784.613	2.32821		71.9034	2.49139	0.0475382	0.00156422	-0.0159867	88.55	2.04	89.04	1.53	75.4	39		89.1	2		0.550314	15.319
12SGM25-60	2780.38	5.91284		71.935	3.39554	0.0468221	0.00241302	0.46903	87.22	2.13	89	2.09	39	61.6		89.1	2.1		2	56.1798
12SGM25-2	995.059	2.12249		71.7732	2.35728	0.0478878	0.00160829	0.475081	89.33	1.46	89.2	1.45	92.8	39.8		89.2	1.5		-0.14574	-4.03587
12SGM25-43	973.503	4.55632		71.1776	1.99934	0.0544757	0.00204791	0.365353	101.83	1.83	89.94	1.25	389.9	42.2		89.2	1.8		-13.2199	-333.511
12SGM25-18	969.843	3.25778		71.8252	3.63095	0.0466492	0.00155525	0.533381	87.05	1.8	89.13	2.24	30.3	40.1		89.3	1.8		2.33367	66.0047
12SGM25-56	869.045	2.19321		71.6093	2.85242	0.0484059	0.00177594	0.391272	90.45	1.83	89.4	1.77	118.3	43.3		89.3	1.8		-1.1745	-32.3266
12SGM25-6	1143.43	1.79271		71.2622	3.36979	0.0493397	0.00181953	0.461207	92.54	1.97	89.83	2.11	163	43.1		89.7	1.9		-3.01681	-81.4539
12SGM25-57	1177.85	4.46008		71.2883	3.16984	0.0462366	0.00194183	0.348096	86.94	2.06	89.8	1.98	9.07	50.48		90	2.1		3.18486	89.8998
12SGM25-53	1320.43	3.40053		70.0901	2.61914	0.063428	0.00652818	-0.0349162	119.34	6.23	91.32	1.69	722	109		90.1	6.2		-30.6833	-690.626
12SGM25-9	1430.71	1.90653		70.9746	3.17154	0.0475142	0.00147108	0.761808	89.6	1.25	90.19	2	73.9	36.8		90.2	1.3		0.654175	18.0619
12SGM25-19	681.274	1.81942		71.0289	3.38978	0.0466954	0.00171127	0.11986	88.07	2.39	90.12	2.14	32.8	43.9		90.3	2.4		2.27474	63.6041
12SGM25-42	877.849	2.6807		70.8629	2.32502	0.0477618	0.0016505	0.314701	90.19	1.7	90.33	1.47	86.3	41		90.3	1.7		0.154987	4.46142
12SGM25-13	2041.87	2.37571		70.7523	3.25331	0.0484042	0.00169223	0.4075	91.48	1.97	90.47	2.07	117.8	41.2		90.4	2		-1.11639	-30.2089
12SGM25-25	1558.76	3.6842		70.4564	2.69235	0.0504109	0.00176525	0.73958	95.49	1.21	90.85	1.72	212.9	40.7		90.6	1.2		-5.10732	-134.342
12SGM25-58	973.921	3.98267		62.919	3.64846	0.133176	0.0112587	-0.347614	259.9	13.5	101.65	2.92	2139.5	73.9		91	13		-155.681	-2004.77
12SGM25-8	719.288	1.01541		70.1074	3.26182	0.0482835	0.00160533	0.324588	92.07	2.1	91.3	2.11	112	39.4		91.3	2.1		-0.843373	-22.6725
12SGM25-11	1068.75	4.17298		70.0995	3.11206	0.0478119	0.00203788	0.606731	91.22	1.69	91.31	2.01	88.8	50.6		91.3	1.7		0.0985653	2.74888
12SGM25-54	1153.66	2.51207		70.2177	3.43701	0.0468589	0.00187861	0.200712	89.34	2.43	91.16	2.22	41	48		91.3	2.5		1.99649	55.0241
12SGM25-55	974.705	3.1137		69.9726	2.67944	0.0498078	0.00199166	0.238444	95.03	2.19	91.48	1.74	185.1	46.5		91.3	2.2		-3.88063	-102.339
12SGM25-64	413.122	1.87047		69.593	3.76503	0.0540945	0.00332719	0.202159	103.32	3.6	91.97	2.47	373.8	69.3		91.3	3.5		-12.341	-306.437
12SGM25-39	710.845	2.22546		68.9784	2.52929	0.0600809	0.00232947	0.294705	115.11	2.44	92.78	1.69	605.5	41.9		91.4	2.3		-24.0677	-552.619
12SGM25-51	1344.37	4.71606		69.701	2.54235	0.0479201	0.00139203	0.326673	91.92	1.69	91.83	1.66	94.3	34.3		91.8	1.7		-0.0980072	-2.68975
12SGM25-15	982.701	2.23052		69.5164	2.37458	0.0488554	0.00231603	0.224199	93.88	2.33	92.07	1.56	140.1	55.7		92	2.3		-1.9659	-52.1668
12SGM25-59	2555.18	3.28537		69.2765	3.39809	0.0504111	0.00198498	0.465041	97.04	2.15	92.39	2.25	212.9	45.5		92.1	2.1		-5.03301	-130.436
12SGM25-24	433.741	2.6844		68.3142	3.94903	0.0494712	0.00178312	0.218742	96.59	2.81	93.68	2.69	169.1	42		93.5	2.7		-3.10632	-80.5081
12SGM25-47	655.824	1.984		68.3854	3.22228	0.0489821	0.00192359	0.335841	95.58	2.29	93.58	2.19	145.8	46		93.5	2.3		-2.13721	-55.8025
12SGM25-22	1772.83	3.54103		68.2077	3.51013	0.0483178	0.00192188	0.61264	94.59	1.87	93.83	2.4	113.9	46.9		93.8	1.9		-0.809975	-21.3897
12SGM25-7	1187.49	1.76755		67.6757	2.60839	0.0465923	0.00165048	0.296501	92.04	1.93	94.56	1.81	27.2	42.5		94.7	2		2.66497	71.2352
12SGM25-16	1245.6	1.93193		67.4517	3.29728	0.0462949	0.00210708	0.293109	91.76	2.47	94.87	2.3	11.7	54.8		95.1	2.5		3.27817	87.6673
12SGM25-49	1382.59	3.44022		67.0899	2.4766	0.0471308	0.00187694	0.417568	93.83	1.86	95.38	1.75	54.7	47.6		95.5	1.9		1.62508	42.6505
12SGM25-38	1117.51	2.52609		66.546	2.39815	0.0479998	0.00143575	0.189538	96.23	1.94	96.15	1.72	98.2	35.5		96.1	1.9		-0.0832033	-2.13209
12SGM25-41	791.353	2.45868		66.3897	2.7151	0.0482024	0.00161589	-0.0035901	96.83	2.45	96.38	1.96	108	39.7		96.4	2.4		-0.466902	-12.0564
12SGM25-44	533.134	2.95638		66.359	2.79227	0.0485085	0.00210645	-0.00770613	97.47	2.82	96.42	2.01	123.2	51.2		96.4	2.8		-1.08899	-27.7743
12SGM25-37	871.204	2.40583		63.4945	1.95878	0.0768667	0.00585914	0.0343857	156.68	5.9	100.74	1.54	1116.9	76.1		97.1	6		-55.5291	-1008.7
12SGM25-10	941.762	1.94096		63.285	2.6222	0.0526323	0.00200634	0.389769	110.18	2.3	101.07	2.08	311.9	43.5		100.5	2.2		-9.01355	-208.598
12SGM25-28	1017.2	4.33854		62.3772	6.22246	0.0561394	0.00180353	-0.0687633	118.73	5.99	102.53	5.07	456.9	35.6		101.5	5.3		-15.8003	-345.626
12SGM25-20	1248.35	7.50961		52.8768	8.4618	0.0552415	0.00383881	-0.842581	136.6	14.2	120.78	9.57	420.9	77.6		120	13		-13.0982	-248.485
12SGM25-5	655.786	9.52345		44.335	10.9935	0.0618062	0.00462942	-0.848823	178.5	25.7	143.8	17.6	666.6	80.2		141	22		-24.1307	-363.561
12SGM25-3	614.697	2.52283		15.9274	4.74151	0.0909755	0.00579799	-0.825452	589.6	78.8	392.5	56.7	1445.3	60.7		375	62		-50.2166	-268.229
18SGM59_13	2700	1.5		60.9756	5.20523	0.051	0.003	n.d.	110.8	5.4	104.9	4.4	240	68		104.5	4.4		-5.6244	-128.789
18SGM59_16	287	0.496		60.241	3.62897	0.0508	0.0039	n.d.	111.6	5.2	106.1	3.2	231	89		105.8	3.2		-5.18379	-117.719
18SGM59_30	1110	0.646		49.505	2.69581	0.0537	0.0032	n.d.	141.5	5.3	128.9	3.5	357	67		128.1	3.5		-9.77502	-176.959
18SGM59_22	226.3	1.128		48.7805	2.37954	0.0555	0.0043	n.d.	147.9	6.3	130.8	3.2	431	86		129.7	3.1		-13.0734	-229.511
18SGM59_37	326	0.623		48.5437	2.82779	0.0534	0.0051	n.d.	143.3	7.5	131.4	3.8	345	108		130.7	3.8		-9.05632	-162.557
18SGM59_17	246	0.98		47.619	2.49433	0.0555	0.0044	n.d.	151.3	6.7	134	3.5	431	88		132.8	3.4		-12.9104	-221.642
18SGM59_41	1830	2.28		47.8469	3.20505	0.05	0.0028	n.d.	136.6	5.6	133.3	4.4	194	65		133.1	4.4		-2.47562	-45.5364
18SGM59_12	381	0.849		47.619	2.94785	0.0517	0.0027	n.d.	141.6	5.4	134	4.1	271	60		133.5	4.1		-5.67164	-102.239
18SGM59_28	495	0.452		46.9484	2.86539	0.0629	0.0035	n.d.	172	6.5	135.9	4.1	704	59		133.5	4		-26.5636	-418.028
18SGM59_39	386	0.873		46.9484	3.30622	0.0552	0.0044	n.d.	152.5	7.5	135.9	4.7	419	89		134.8	4.7		-12.2149	-208.315
18SGM59_1	146.8	0.596		46.5116	2.37966	0.052	0.0036	n.d.	145.5	5.8	137.1	3.5	284	79		136.6	3.5		-6.12691	-107.148
18SGM59_27	879	1.362		46.5116	2.81233	0.0519	0.0032	n.d.	145.2	5.8	137.1	4.1	280	71		136.6	4.1		-5.9081	-104.23
18SGM59_29	258	1.08		46.5116	2.16333	0.0497	0.0041	n.d.	139.5	6.2	137.1	3.2	180	96		137	3.2		-1.75055	-31.291
18SGM59_25	164	0.538		44.7227	1.94012	0.0764	0.0094	n.d.	215	13	142.6	3.1	1105	123		137.7	3		-50.7714	-674.895
18SGM59_21	453	0.79		46.0829	3.18546	0.0523	0.0037	n.d.	147.6	6.8	138.4	4.7	298	81		137.8	4.7		-6.6474	-115.318
18SGM59_20	88	2.36		45.8716	2.94588	0.0529	0.0057	n.d.	149.8	8.7	139	4.4	323	122		138.3	4.4		-7.76978	-132.374
18SGM59_19	168	0.603		45.6621	2.91904	0.0529	0.0039	n.d.	150.4	6.8	139.7	4.4	323	84		138.9	4.4		-7.65927	-131.21
18SGM59_35	181	1.063		45.4545	2.68595	0.0523	0.006	n.d.	149.5	9	140.3	4.1	298	131		139.7	4.1		-6.55738	-112.402
18SGM59_31	145	2.04		45.2489	2.86644	0.0542	0.0036	n.d.	155.1	6.6	140.9	4.4	378	75		140	4.4		-10.0781	-168.275
18SGM59_32	212	0.808		45.2489	3.07119	0.0487	0.0039	n.d.	140.4	6.9	140.9	4.7	132	94		140.9	4.7		0.354862	6.31654
18SGM59_18	313	0.537		44.6429	2.39158	0.0503	0.0035	n.d.	146.6	6	142.8	3.8	208	81		142.6	3.8		-2.66106	-45.6583
18SGM59_36	168.4	0.751		44.6429	2.79018	0.0502	0.0038	n.d.	146.3	6.7	142.8	4.4	203	88		142.6	4.4		-2.45098	-42.1569
18SGM59_15	367	0.755		44.4444	2.76543	0.0495	0.0039	n.d.	145	6.8	143.4	4.4	171	92		143.3	4.4		-1.11576	-19.2469
18SGM59_4	201.4	0.918		44.2478	2.54523	0.0528	0.0042	n.d.	154.6	7	144.1	4.1	319	90		143.4	4.1		-7.28661	-121.374
18SGM59_38	288	0.5		39.2157	2.92195	0.142	0.013	n.d.	411	20	162.3	6	2251	79		143.6	5.3		-153.235	-1286.94
18SGM59_2	177	1.222		44.2478	3.13259	0.0493	0.0042	n.d.	145	7.5	144.1	5	161	100		144	5		-0.624566	-11.728
18SGM59_5	278	0.89		44.2674	1.94	0.0486	0.0032	n.d.	143.1	5.3	144	3.1	128	77		144.1	3.1		0.625	11.1111
18SGM59_10	373	3.04		44.2478	2.34944	0.0483	0.0038	n.d.	142.3	6.3	144.1	3.8	113	93		144.2	3.8		1.24913	21.5822
18SGM59_3	117.5	0.781		42.0168	2.11849	0.086	0.013	n.d.	252	18	151.6	3.8	1337	146		144.7	3.6		-66.2269	-781.926
18SGM59_14	127.1	1.028		43.8596	2.11604	0.0484	0.0035	n.d.	143.8	5.8	145.3	3.5	118	85		145.4	3.5		1.03235	18.7887
18SGM59_34	135	0.755		43.6681	2.28829	0.0512	0.0056	n.d.	152.1	8.6	146	3.8	249	126		145.6	3.8		-4.17808	-70.5479
18SGM59_8	253	0.626		43.6681	2.86036	0.0506	0.004	n.d.	150.4	7.2	146	4.7	222	91		145.7	4.7		-3.0137	-52.0548
18SGM59_40	199	1.038		43.29	2.62364	0.0554	0.0068	n.d.	165	10	147.2	4.4	427	137		146	4.4		-12.0924	-190.082
18SGM59_9	153.5	0.722		43.4783	2.26843	0.0489	0.0051	n.d.	146.3	7.9	146.6	3.8	142	122		146.6	3.8		0.204638	3.13779
18SGM59_24	267	0.673		43.4783	2.45747	0.0483	0.0039	n.d.	144.6	6.6	146.6	4.1	113	95		146.7	4.1		1.36426	22.9195
18SGM59_7	224	0.668		43.29	2.43624	0.0489	0.0025	n.d.	146.9	5.2	147.2	4.1	142	60		147.2	4.1		0.203804	3.53261
18SGM59_26	127.2	2.99		42.5532	2.35401	0.0555	0.008	n.d.	168	12	149.7	4.1	431	161		148.5	4.1		-12.2244	-187.909
18SGM59_23	155	0.955		42.9185	2.94719	0.0462	0.0046	n.d.	140.5	7.9	148.5	5	7	119.8		149	5.1		5.38721	95.2862
18SGM59_33	127	0.93		42.1941	1.95838	0.0507	0.0033	n.d.	155.6	5.8	151	3.5	226	75		150.7	3.5		-3.04636	-49.6689
18SGM59_6	266	0.5		41.841	2.45094	0.0541	0.0053	n.d.	166.5	8.8	152.3	4.4	374	110		151.3	4.4		-9.3237	-145.568
18SGM59_11	172	1.026		41.841	2.27587	0.0485	0.0048	n.d.	150.5	7.9	152.3	4.1	123	117		152.4	4.1		1.18188	19.2383
								n.d.
18SGM60_11	514	2.97		6.0241	0.508056	0.0866	0.0051	n.d.	1109	35	990	39	1351	57		990	39		-12.0202	-36.4646
18SGM60_37	201	2.71		5.05051	0.280584	0.0906	0.0083	n.d.	1264	39	1165	30	1437	87		1165	30		-8.49785	-23.3476
18SGM60_23	695	4.53		4.6729	0.240196	0.0912	0.0075	n.d.	1326	36	1250	29	1450	78		1250	29		-6.08	-16
18SGM60_1	1650	7.2		4.60829	0.254837	0.0865	0.0059	n.d.	1297	32	1266	32	1349	66		1266	32		-2.44866	-6.55608
18SGM60_42	449	1.55		4.60829	0.318546	0.0868	0.0072	n.d.	1299	40	1266	40	1355	80		1266	40		-2.60664	-7.03002
18SGM60_26	420	2.69		4.65116	0.2596	0.0895	0.0072	n.d.	1315	36	1255	32	1414	77		1255	32		-4.78088	-12.6693
18SGM60_29	880	5.44		4.58716	0.31563	0.0972	0.0079	n.d.	1387	40	1271	40	1570	76		1271	40		-9.12667	-23.5248
18SGM60_39	305	3.17		4.56621	0.271054	0.091	0.0072	n.d.	1341	37	1277	34	1446	75		1277	34		-5.01175	-13.2341
18SGM60_3	880	5.18		4.56621	0.208503	0.0903	0.0048	n.d.	1335	26	1277	26	1431	51		1277	26		-4.5419	-12.0595
18SGM60_10	896	2.49		4.54545	0.227273	0.0919	0.0049	n.d.	1352	27	1282	29	1464	51		1282	29		-5.46022	-14.1966
18SGM60_20	1855	6.9		4.54545	0.268595	0.0854	0.005	n.d.	1298	30	1282	34	1324	57		1282	34		-1.24805	-3.27613
18SGM60_31	354	2.11		4.01606	0.209674	0.0886	0.0077	n.d.	1418	39	1433	34	1395	83		1433	34		1.04676	2.65178
18SGM60_30	1170	5.27		4.40529	0.213472	0.0928	0.0082	n.d.	1383	38	1319	29	1483	84		1319	29		-4.85216	-12.4337
18SGM60_17	830	3.74		4.40529	0.252285	0.096	0.0058	n.d.	1408	32	1319	34	1547	57		1319	34		-6.74754	-17.2858
18SGM60_34	980	3.18		4.38596	0.28855	0.0836	0.0063	n.d.	1308	37	1324	39	1282	73		1324	39		1.20846	3.17221
18SGM60_36	434	3.7		4.42478	0.274101	0.0975	0.0071	n.d.	1417	37	1313	37	1576	68		1313	37		-7.92079	-20.0305
18SGM60_18	376	2.21		4.36681	0.362312	0.0929	0.0049	n.d.	1390	37	1329	50	1485	50		1329	50		-4.58992	-11.7381
18SGM60_7	269	2.128		4.34783	0.20794	0.0881	0.0055	n.d.	1354	29	1335	29	1384	60		1335	29		-1.42322	-3.67041
18SGM60_13	423	3.44		4.01606	0.241932	0.0849	0.0063	n.d.	1385	36	1433	39	1312	72		1433	39		3.34962	8.44382
18SGM60_41	255	2.68		3.89105	0.257385	0.0903	0.008	n.d.	1457	43	1474	44	1431	85		1474	44		1.15332	2.91723
18SGM60_9	683	4.22		4.2735	0.25568	0.0949	0.0053	n.d.	1423	31	1355	37	1525	53		1355	37		-5.01845	-12.5461
18SGM60_22	770	3.16		4.04858	0.213083	0.0881	0.0063	n.d.	1407	34	1423	34	1384	69		1423	34		1.12439	2.74069
18SGM60_28	227	2.07		3.90625	0.183105	0.0884	0.0076	n.d.	1437	38	1469	31	1390	82		1469	31		2.17835	5.37781
18SGM60_32	880	7.1		4.01606	0.290318	0.0888	0.0069	n.d.	1420	41	1433	46	1399	74		1433	46		0.907188	2.37264
18SGM60_8	210	1.53		3.96825	0.220459	0.0871	0.0042	n.d.	1414	28	1449	36	1362	46		1449	36		2.41546	6.00414
18SGM60_38	550	9.3		4.16667	0.399306	0.0841	0.0073	n.d.	1351	48	1387	60	1294	84		1387	60		2.59553	6.70512
18SGM60_35	241	2.63		4.1841	0.315121	0.089	0.0089	n.d.	1390	47	1381	47	1403	96		1381	47		-0.651702	-1.59305
18SGM60_21	284	2.78		4.1841	0.245094	0.0867	0.0045	n.d.	1370	29	1381	36	1353	50		1381	36		0.796524	2.02752
18SGM60_14	276	1.74		4.16667	0.260417	0.0926	0.0059	n.d.	1423	34	1387	39	1479	60		1387	39		-2.59553	-6.63302
18SGM60_25	666	2.2		4.16667	0.260417	0.0971	0.0083	n.d.	1460	41	1387	39	1568	80		1387	39		-5.26316	-13.0497
18SGM60_33	402	2.12		4.1841	0.21008	0.0896	0.0071	n.d.	1395	36	1381	31	1416	76		1381	31		-1.01376	-2.5344
18SGM60_5	378	2.15		4.25532	0.289724	0.0896	0.006	n.d.	1382	36	1361	42	1416	64		1361	42		-1.54298	-4.04115
18SGM60_19	960	4.7		4.16667	0.225694	0.0875	0.0055	n.d.	1380	31	1387	34	1371	60		1387	34		0.504686	1.15357
18SGM60_15	287	1.86		4.14938	0.223825	0.0876	0.005	n.d.	1384	30	1392	34	1373	55		1392	34		0.574713	1.36494
18SGM60_27	870	4.79		4.14938	0.206608	0.0941	0.007	n.d.	1439	34	1392	31	1509	70		1392	31		-3.37644	-8.40517
18SGM60_2	447	1.96		4.13223	0.25613	0.0897	0.0046	n.d.	1406	31	1397	39	1418	49		1397	39		-0.644238	-1.50322
18SGM60_16	315	1.78		4.11523	0.237091	0.0921	0.0055	n.d.	1429	32	1402	36	1469	57		1402	36		-1.92582	-4.77889
18SGM60_24	266	1.81		4.11523	0.203221	0.0902	0.0072	n.d.	1413	36	1402	31	1429	76		1402	31		-0.784593	-1.92582
18SGM60_12	970	2.47		4.09836	0.218355	0.0903	0.0059	n.d.	1417	32	1407	34	1431	62		1407	34		-0.710732	-1.70576
18SGM60_6	388	2.45		3.95257	0.203096	0.0878	0.0043	n.d.	1423	27	1454	33	1377	47		1454	33		2.13205	5.29574
18SGM60_4	211.4	1.97		4	0.208	0.0928	0.0061	n.d.	1457	32	1438	34	1483	62		1438	34		-1.32128	-3.12935
18SGM60_40	325	2.68		4.01606	0.25806	0.094	0.0082	n.d.	1463	42	1433	41	1507	82		1433	41		-2.09351	-5.16399
17SGM49C_4	5470	7.3		87.4891	5.35804	0.0771	0.0086	n.d.	116.4	7	73.3	2.2	1123	111		70.5	2.1		-58.7995	-1432.06
17SGM49C_27	4140	17.34		90.4977	5.73289	0.0479	0.0022	n.d.	71.5	2.7	70.8	2.2	93	54		70.8	2.2		-0.988701	-31.3559
17SGM49C_25	1940	6.86		87.4126	5.73072	0.0699	0.0058	n.d.	106.2	5.3	73.3	2.4	924	85		71.3	2.3		-44.884	-1160.57
17SGM49R_30	1281	10.45		80.2568	5.28175	0.128	0.018	n.d.	202	14	79.8	2.6	2070	124		71.8	2.3		-153.133	-2493.98
17SGM49R_19	289	1.223		87.184	4.86467	0.0572	0.0076	n.d.	87.9	6.1	73.5	2	498	146		72.6	2		-19.5918	-577.551
17SGM49C_26	7710	7.07		82.7815	5.48222	0.0782	0.006	n.d.	124.3	5.9	77.4	2.5	1151	76		74.4	2.5		-60.5943	-1387.08
17SGM49R_25	278	3.57		85.034	6.07386	0.057	0.0057	n.d.	89.7	5.3	75.4	2.7	491	110		74.5	2.6		-18.9655	-551.194
17SGM49C_23	8130	9.89		85.7633	6.4727	0.047	0.0024	n.d.	73.9	3.2	74.7	2.8	48	61		74.8	2.8		1.07095	35.743
17SGM49C_8	2810	4.81		84.7458	4.02183	0.0525	0.0021	n.d.	83.2	2.5	75.6	1.8	306	46		75.2	1.8		-10.0529	-304.762
17SGM49R_6	230	3.27		83.0565	3.17325	0.0544	0.0034	n.d.	87.8	3.1	77.2	1.5	387	70		76.5	1.5		-13.7306	-401.295
17SGM49C_13	297	1.069		83.1255	3.93862	0.054	0.0037	n.d.	87.1	3.5	77.1	1.8	370	77		76.5	1.8		-12.9702	-379.896
17SGM49C_18	1520	4.15		83.612	6.50161	0.0488	0.0021	n.d.	78.6	3.4	76.6	3	137	51		76.5	3		-2.61097	-78.8512
17SGM49R_11	194	1.958		82.4402	5.02933	0.0581	0.0064	n.d.	94.1	5.7	77.7	2.4	533	121		76.7	2.3		-21.1068	-585.972
17SGM49C_6	6700	9.7		75.7576	5.73921	0.1209	0.0066	n.d.	201.9	8.5	84.5	3.2	1969	49		76.8	2.9		-138.935	-2230.18
17SGM49C_9	1396	5.25		81.9001	3.62212	0.0523	0.0022	n.d.	85.6	2.5	78.2	1.7	298	48		77.8	1.7		-9.46292	-281.074
17SGM49C_21	4330	9.03		79.3651	6.9287	0.075	0.0052	n.d.	124.3	6.5	80.7	3.5	1068	70		77.9	3.4		-54.0273	-1223.42
17SGM49R_31	170	1.445		77.5795	5.35654	0.089	0.02	n.d.	149	16	82.6	2.8	1403	215		78.3	2.7		-80.3874	-1598.55
17SGM49C_17	830	2.95		80.1282	4.49437	0.061	0.0057	n.d.	101.3	5.3	80	2.2	638	101		78.6	2.2		-26.625	-697.5
17SGM49C_20	7300	6.4		79.3651	6.9287	0.0672	0.0059	n.d.	112.1	6.6	80.7	3.5	843	91		78.7	3.4		-38.9095	-944.61
17SGM49C_22	730	2.1		80.9717	5.37626	0.0488	0.003	n.d.	81	3.5	79.1	2.6	137	72		79	2.6		-2.40202	-73.1985
17SGM49R_24	194	1.536		78.9889	4.24269	0.0642	0.0066	n.d.	107.8	5.9	81.1	2.2	747	109		79.4	2.1		-32.9223	-821.085
17SGM49R_13	290	1.309		79.8722	3.57256	0.0477	0.0031	n.d.	80.3	3	80.2	1.8	83	77		80.2	1.8		-0.124688	-3.49127
17SGM49R_15	204	2.31		73.5294	5.40657	0.108	0.021	n.d.	187	18	87.1	3.2	1765	178		80.5	2.9		-114.696	-1926.41
17SGM49R_20	169	1.898		77.8816	3.69998	0.0564	0.0062	n.d.	96.6	5.5	82.2	1.9	467	122		81.3	1.9		-17.5182	-468.127
17SGM49R_16	166	1.986		76.5111	4.21484	0.07	0.014	n.d.	121	12	83.7	2.3	927	205		81.4	2.2		-44.5639	-1007.53
17SGM49R_18	240	1.495		78.0031	4.56337	0.0524	0.006	n.d.	89.9	5.5	82.1	2.4	302	131		81.6	2.4		-9.50061	-267.844
17SGM49R_9	232	1.657		76.2777	3.3746	0.0665	0.0059	n.d.	115.2	5.4	84	1.8	821	93		82	1.8		-37.1429	-877.381
17SGM49R_3	138.3	2.353		78.0031	4.13745	0.0475	0.0048	n.d.	81.8	4.5	82.1	2.2	73	120		82.1	2.2		0.365408	11.084
17SGM49R_33	178	2.46		76.9823	5.03733	0.0579	0.0055	n.d.	100.1	5.5	83.2	2.7	525	104		82.1	2.7		-20.3125	-531.01
17SGM49R_4	175.5	2.631		77.3994	3.05524	0.0517	0.005	n.d.	89.4	4.5	82.8	1.6	271	111		82.3	1.6		-7.97101	-227.295
17SGM49C_1	1365	4.9		77.5795	4.45375	0.0496	0.0025	n.d.	85.7	3.1	82.6	2.4	175	59		82.4	2.3		-3.75303	-111.864
17SGM49C_5	3250	5.42		75.188	6.21855	0.0716	0.0046	n.d.	125.2	6.2	85.2	3.5	974	65		82.6	3.4		-46.9484	-1043.19
17SGM49R_5	147	2.35		76.5111	4.33192	0.0565	0.0063	n.d.	98.4	5.9	83.7	2.4	471	123		82.8	2.3		-17.5627	-462.724
17SGM49R_7	223	2.88		76.864	3.42668	0.0528	0.0046	n.d.	91.8	4.3	83.3	1.8	319	99		82.8	1.8		-10.2041	-282.953
17SGM49R_22	225	2.05		74.2942	4.36051	0.0784	0.0085	n.d.	137.9	7.9	86.2	2.5	1156	108		82.9	2.4		-59.9768	-1241.07
17SGM49R_23	183	2.35		73.9098	4.3155	0.0794	0.0085	n.d.	140.2	8	86.6	2.5	1181	106		83.2	2.4		-61.8938	-1263.74
17SGM49R_37	140	2.21		74.0741	5.48697	0.076	0.018	n.d.	134	16	86.4	3.2	1094	237		83.4	3.1		-55.0926	-1166.2
17SGM49R_1	123.2	2.47		76.3359	4.19556	0.0496	0.0054	n.d.	87.1	5.1	83.9	2.3	175	127		83.7	2.3		-3.81406	-108.582
17SGM49R_12	218	1.673		76.1615	2.78427	0.0498	0.0037	n.d.	87.6	3.5	84.1	1.5	185	87		83.9	1.5		-4.16171	-119.976
17SGM49C_12	263	1.348		75.9878	3.92642	0.0509	0.0036	n.d.	89.7	3.8	84.3	2.2	235	82		83.9	2.2		-6.40569	-178.766
17SGM49R_35	204	2.76		73.046	4.69543	0.076	0.013	n.d.	136	12	87.7	2.8	1094	171		84.5	2.7		-55.0741	-1147.43
17SGM49R_14	188	1.879		73.692	3.42122	0.0686	0.0086	n.d.	122.6	7.7	86.9	2	886	130		84.6	2		-41.0817	-919.563
17SGM49R_36	162	1.96		74.6269	5.56917	0.0547	0.0064	n.d.	97.7	6.5	85.8	3.2	399	131		85.1	3.2		-13.8695	-365.035
17SGM49R_10	160	1.97		73.5835	3.79017	0.0647	0.0057	n.d.	116.1	5.6	87	2.2	764	93		85.2	2.2		-33.4483	-778.161		Pb loss
17SGM49C_14	582	2.7		74.8503	3.80975	0.0506	0.0029	n.d.	90.4	3.3	85.6	2.2	222	66		85.2	2.2		-5.60748	-159.346
17SGM49R_21	183	2.156		72.4638	5.251	0.075	0.015	n.d.	135	13	88.4	3.2	1068	201		85.3	3.1		-52.7149	-1108.14
17SGM49R_32	131	1.793		73.5294	5.40657	0.0632	0.0065	n.d.	113.7	6.8	87.1	3.2	714	109		85.4	3.1		-30.5396	-719.747
17SGM49R_29	197	2.28		70.922	5.02993	0.088	0.018	n.d.	160	16	90.3	3.2	1382	197		85.7	3		-77.1872	-1430.45
17SGM49C_15	314	1.003		74.5712	4.55991	0.0485	0.0037	n.d.	87.2	4.1	85.9	2.6	123	90		85.8	2.6		-1.51339	-43.1898
17SGM49C_7	347	1.707		74.5712	3.44774	0.0482	0.0033	n.d.	86.6	3.4	85.9	2	108	81		85.8	2		-0.814901	-25.7276
17SGM49R_17	182	2.05		72.9927	4.15579	0.064	0.011	n.d.	115.8	9.9	87.7	2.5	741	182		85.9	2.4		-32.041	-744.926
17SGM49R_8	140.8	1.748		63.6943	3.28614	0.162	0.023	n.d.	305	20	100.4	2.6	2476	120		86.1	2.2		-203.785	-2366.14
17SGM49R_27	165	1.831		71.8391	5.10924	0.073	0.013	n.d.	133	12	89.1	3.1	1013	180		86.3	3		-49.2705	-1036.92
17SGM49C_24	463	1.48		73.5294	4.81185	0.0504	0.0028	n.d.	91.7	3.8	87.1	2.8	212	64		86.8	2.8		-5.28129	-143.398
17SGM49C_11	255	1.012		72.3066	4.44401	0.0626	0.0065	n.d.	114.5	6.5	88.5	2.7	694	111		86.9	2.7		-29.3785	-684.181
17SGM49C_16	244	1.321		72.5163	4.36465	0.0581	0.0046	n.d.	106.3	5	88.3	2.6	533	87		87.1	2.6		-20.3851	-503.624
17SGM49R_34	151	1.72		58.1395	5.40833	0.209	0.026	n.d.	409	26	109.9	5.1	2897	101		87.8	4.1		-272.157	-2536.03
17SGM49R_38	136	1.98		69.4927	4.53948	0.0608	0.0079	n.d.	115.6	7.9	92.1	3	631	140		90.6	2.9		-25.5157	-585.125
17SGM49R_2	275	5.98		69.4927	4.58777	0.054	0.0031	n.d.	103.3	4.3	92.1	3	370	65		91.4	3		-12.1607	-301.737
17SGM49R_28	176	2.026		68.4932	5.62957	0.0545	0.006	n.d.	105.7	6.9	93.4	3.8	391	124		92.7	3.8		-13.1692	-318.63
17SGM49R_26	173	1.7		64.4745	4.03226	0.0771	0.0086	n.d.	154.9	9.2	99.2	3.1	1123	111		95.6	3		-56.1492	-1032.06
17SGM49C_10	2060	7.31		38.1679	2.62222	0.0832	0.006	n.d.	267	12	166.7	5.7	1273	70		159.7	5.4		-60.168	-663.647
17SGM49C_2	1063	4.4		35.8423	1.41314	0.0643	0.0024	n.d.	224.3	5.5	177.4	3.4	751	39		174.2	3.4		-26.4374	-323.337
17SGM49C_19	1370	4.01		18.5874	1.5547	0.083	0.0045	n.d.	487	19	338	14	1268	53		326	13		-44.0828	-275.148
17SGM49C_3	498	3.19		13.245	0.824525	0.0726	0.0025	n.d.	571	16	469	14	1002	35		460	14		-21.7484	-113.646
								n.d.
17SGM47C_13	990	0.857		93.8967	5.99528	0.0509	0.0039	n.d.	73.2	3.5	68.3	2.2	235	88		68	2.2		-7.17423	-244.07
17SGM47R_4	148	1.52		90.9091	5.61983	0.0581	0.0081	n.d.	85.7	6.3	70.5	2.2	533	153		69.6	2.1		-21.5603	-656.028
17SGM47R_24	109.6	1.324		84.0336	9.18014	0.1	0.014	n.d.	154	13	76.3	4.1	1623	130		71.2	3.9		-101.835	-2027.13
17SGM47R_25	268	0.902		86.0585	4.29552	0.0635	0.0061	n.d.	98.3	5.1	74.5	1.8	724	102		73	1.8		-31.9463	-871.812
17SGM47R_5	265	1.95		85.1789	5.00625	0.058	0.0069	n.d.	91.1	5.8	75.2	2.2	529	130		74.3	2.2		-21.1436	-603.457
17SGM47R_10	199	1.164		83.8926	3.87088	0.0525	0.0052	n.d.	84	4.4	76.4	1.8	306	113		75.9	1.7		-9.94764	-300.524
17SGM47R_11	304	1.599		83.2639	5.47698	0.0579	0.0047	n.d.	92.9	4.6	77	2.5	525	89		76	2.5		-20.6494	-581.818
17SGM47R_8	1109	1.552		83.4028	3.47802	0.0516	0.0025	n.d.	83.1	2.5	76.8	1.6	267	56		76.4	1.6		-8.20312	-247.656
17SGM47R_7	113	0.971		81.8331	5.22339	0.0625	0.0062	n.d.	101.6	5.7	78.3	2.5	690	106		76.8	2.4		-29.7573	-781.226
17SGM47R_9	133	1.351		81.8331	5.29035	0.061	0.017	n.d.	99	14	78.3	2.5	638	300		77	2.5		-26.4368	-714.815
17SGM47R_23	96	0.908		78.9889	5.55294	0.085	0.017	n.d.	140	14	81.1	2.8	1315	194		77.3	2.7		-72.6264	-1521.45
17SGM47R_13	121	0.907		78.125	5.85938	0.0819	0.0096	n.d.	137	8.9	82	3.1	1242	115		78.5	2.9		-67.0732	-1414.63
17SGM47C_16	670	0.906		81.5661	5.25589	0.0475	0.003	n.d.	78.4	3.4	78.6	2.5	73	75		78.6	2.5		0.254453	7.12468
17SGM47R_15	345	1.49		80.0641	3.07692	0.0565	0.0045	n.d.	94.2	4	80	1.5	471	88		79.1	1.5		-17.75	-488.75
17SGM47R_16	120	1.288		78.4314	4.73664	0.0658	0.0065	n.d.	111.1	6.1	81.7	2.5	799	104		79.8	2.4		-35.9853	-877.968
17SGM47C_20	232	0.748		79.7448	4.00632	0.0505	0.0045	n.d.	85	4.2	80.3	2	217	103		80	2		-5.85305	-170.237
17SGM47C_15	1270	0.91		79.3651	5.35399	0.0525	0.0031	n.d.	88.6	3.8	80.7	2.7	306	67		80.2	2.7		-9.78934	-279.182
17SGM47R_14	162	1.33		77.9423	4.9815	0.0638	0.0083	n.d.	108.5	7.5	82.2	2.6	734	138		80.5	2.6		-31.9951	-792.944
17SGM47R_18	92.6	1.066		77.9423	5.46751	0.063	0.0081	n.d.	107.2	7.5	82.2	2.9	707	137		80.6	2.8		-30.4136	-760.097
17SGM47C_1	2170	1.34		79.0514	4.56186	0.0491	0.0016	n.d.	83.4	2.7	81	2.3	152	38		80.9	2.3		-2.96296	-87.6543
17SGM47C_21	831	1.325		78.5546	5.12178	0.0504	0.0031	n.d.	86	3.7	81.5	2.6	212	71		81.3	2.6		-5.52147	-160.123
17SGM47R_6	59.6	0.676		74.6826	4.85242	0.084	0.013	n.d.	146	11	85.7	2.8	1292	151		81.8	2.6		-70.3617	-1407.58
17SGM47C_18	632	0.963		77.2201	4.77035	0.0572	0.0043	n.d.	98.7	4.6	82.9	2.5	498	83		82	2.5		-19.0591	-500.724
17SGM47R_19	160	1.389		75.815	4.71329	0.0675	0.0069	n.d.	117.5	6.6	84.5	2.6	852	106		82.4	2.5		-39.0533	-908.284
17SGM47C_6	1350	1.156		76.864	3.60392	0.0497	0.0023	n.d.	86.7	2.7	83.3	1.9	180	54		83.1	1.9		-4.08163	-116.086
17SGM47R_12	137.1	1.592		76.1035	5.50216	0.0556	0.0059	n.d.	97.4	6	84.2	3	435	118		83.3	3		-15.677	-416.627
17SGM47C_3	531	1.126		75.8725	2.76319	0.0515	0.0028	n.d.	90.8	2.8	84.4	1.5	262	62		84	1.5		-7.58294	-210.427
17SGM47R_2	150	1.436		73.5294	4.05493	0.0764	0.0074	n.d.	135.9	7.1	87.1	2.4	1105	97		84	2.3		-56.0276	-1168.66
17SGM47R_20	104	1.058		74.5712	4.33748	0.0635	0.0058	n.d.	112.7	5.8	85.9	2.5	724	97		84.2	2.4		-31.1991	-742.841
17SGM47C_24	513	1.295		75.7576	3.67309	0.0499	0.0032	n.d.	88.2	3.4	84.5	2	189	75		84.3	2		-4.3787	-123.669
17SGM47R_26	64.6	1.529		73.046	5.22901	0.0662	0.0077	n.d.	119.5	7.7	87.7	3.1	812	122		85.6	3		-36.26	-825.884
17SGM47R_21	213	1.6		70.9723	4.18077	0.08	0.017	n.d.	147	15	90.2	2.6	1196	210		86.6	2.5		-62.9712	-1225.94
17SGM47R_27	124.1	1.382		71.3267	4.477	0.0746	0.0087	n.d.	136.7	8.5	89.8	2.8	1057	117		86.7	2.7		-52.2272	-1077.06
17SGM47C_12	492	1.789		73.5294	4.05493	0.0498	0.0035	n.d.	90.6	3.9	87.1	2.4	185	82		86.9	2.4		-4.01837	-112.4
17SGM47R_1	137	1.006		69.5894	4.69741	0.088	0.014	n.d.	163	13	92	3.1	1382	153		87.3	2.9		-77.1739	-1402.17
17SGM47R_3	51.1	0.76		71.9424	6.21086	0.058	0.019	n.d.	107	17	89	3.8	529	359		87.9	3.8		-20.2247	-494.382
17SGM47C_9	632	1.106		72.3589	3.2462	0.0479	0.0027	n.d.	88.7	3.1	88.5	2	93	67		88.5	2		-0.225989	-5.08475
17SGM47C_4	1400	1.265		68.918	3.56227	0.0481	0.0019	n.d.	93.3	2.9	92.9	2.4	103	47		92.8	2.4		-0.430571	-10.8719
17SGM47C_22	700	0.978		68.4932	5.62957	0.0479	0.0033	n.d.	93.4	4.8	93.4	3.8	93	82		93.4	3.8		0	0.428266
17SGM47C_25	1020	0.604		66.2252	5.26293	0.062	0.013	n.d.	123	13	96.6	3.8	673	224		94.9	3.7		-27.3292	-596.687
17SGM47R_22	123	1.386		64.9351	4.21656	0.0621	0.0072	n.d.	125.7	7.9	98.5	3.2	677	124		96.8	3.1		-27.6142	-587.31
17SGM47R_17	220	2.91		63.2911	4.80692	0.0641	0.0047	n.d.	132.7	6.6	101.1	3.8	744	78		99	3.7		-31.2562	-635.905
17SGM47C_8	1300	4.87		56.4972	4.4687	0.072	0.0042	n.d.	164.3	7.5	113.1	4.4	985	59		109.7	4.3		-45.2697	-770.911
17SGM47C_7	1180	2.77		50.5051	7.90736	0.0587	0.0034	n.d.	151	12	126.4	9.8	555	63		124.8	9.7		-19.462	-339.082
17SGM47C_5	1570	13.02		40.3226	2.60146	0.08	0.0035	n.d.	245.4	8.5	157.9	5	1196	43		151.9	4.8		-55.4148	-657.441
17SGM47C_23	636	1.805		17.094	1.22726	0.0732	0.0028	n.d.	471	15	366	13	1019	39		358	12		-28.6885	-178.415
17SGM47C_14	628	2.36		15.8228	1.35195	0.0695	0.0031	n.d.	481	18	395	16	913	46		388	16		-21.7722	-131.139
17SGM47C_19	1056	1.91		14.2857	2.04082	0.135	0.012	n.d.	847	48	436	30	2163	78		394	27		-94.2661	-396.101
17SGM47C_10	471	1.718		10.0503	0.434332	0.0812	0.0031	n.d.	760	15	611	13	1225	37		596	12		-24.3863	-100.491
17SGM47C_17	444	1.71		9.43396	1.246	0.0813	0.0038	n.d.	795	39	649	41	1228	46		634	40		-22.4961	-89.2142
17SGM47C_11	293	0.864		7.90514	0.468684	0.0767	0.0027	n.d.	862	20	768	21	1113	35		757	21		-12.2396	-44.9219
17SGM47C_2	491	1.421		6.59631	0.274121	0.0825	0.003	n.d.	1017	18	910	18	1257	36		896	17		-11.7582	-38.1319
								n.d.
17SGM48C_1	1000	0.946		86.8056	4.06901	0.0507	0.0031	n.d.	78.6	2.9	73.8	1.7	226	71		73.5	1.7		-6.50407	-206.233
17SGM48R_23	467	1.241		85.3242	5.67858	0.065	0.0078	n.d.	101.4	6.6	75.1	2.5	773	126		73.5	2.4		-35.02	-929.294
17SGM48R_24	358	1.55		85.6898	5.43363	0.0612	0.0063	n.d.	95.3	5.5	74.8	2.4	645	111		73.5	2.3		-27.4064	-762.299
17SGM48C_27	899	0.764		85.4701	6.64767	0.0525	0.0039	n.d.	82.5	4.3	75	2.9	306	85		74.5	2.9		-10	-308
17SGM48C_26	606	0.935		84.4595	6.20606	0.0548	0.0044	n.d.	87	4.5	75.9	2.8	403	90		75.2	2.7		-14.6245	-430.962
17SGM48R_3	426	2.39		77.5194	4.0262	0.113	0.014	n.d.	186	11	82.6	2.1	1847	112		75.8	2		-125.182	-2136.08
17SGM48R_22	245	1.077		81.7661	4.81371	0.0713	0.0073	n.d.	115.2	6.4	78.4	2.3	965	105		76	2.2		-46.9388	-1130.87
17SGM48C_21	264	0.511		83.1255	5.59698	0.0542	0.0039	n.d.	87.4	4.1	77.1	2.6	378	81		76.4	2.6		-13.3593	-390.272
17SGM48C_22	520	0.912		82.9187	5.43166	0.0551	0.0047	n.d.	89	4.6	77.3	2.5	415	95		76.5	2.5		-15.1358	-436.869
17SGM48C_25	616	0.716		83.4725	5.85283	0.0504	0.0037	n.d.	81.2	4	76.8	2.7	212	85		76.5	2.7		-5.72917	-176.042
17SGM48R_18	466	1.119		81.4332	5.3051	0.0701	0.0066	n.d.	113.8	6.2	78.7	2.5	930	97		76.5	2.5		-44.5997	-1081.7
17SGM48R_30	486	1.343		83.2639	4.50638	0.0506	0.0034	n.d.	81.7	3.4	77	2.1	222	78		76.7	2.1		-6.1039	-188.312
17SGM48C_28	1079	1.001		82.713	4.92584	0.0523	0.0034	n.d.	84.8	3.6	77.5	2.3	298	74		77	2.3		-9.41935	-284.516
17SGM48C_14	673	0.875		82.5083	4.5611	0.0512	0.0032	n.d.	83.3	3.3	77.7	2.1	249	72		77.3	2.1		-7.20721	-220.463
17SGM48R_15	305	1.53		81.367	5.16405	0.0614	0.0052	n.d.	100.5	5.1	78.7	2.5	652	91		77.4	2.4		-27.7001	-728.463
17SGM48C_17	715	0.71		81.8331	5.89305	0.0537	0.0042	n.d.	87.9	4.5	78.3	2.8	357	88		77.7	2.8		-12.2605	-355.939
17SGM48R_12	299	4.94		73.2064	4.50171	0.135	0.014	n.d.	230	12	87.5	2.7	2163	90		77.9	2.4		-162.857	-2372
17SGM48C_13	675	1.092		81.8331	6.49575	0.0508	0.0031	n.d.	83.4	4	78.3	3.1	231	70		78	3.1		-6.51341	-195.019
17SGM48R_20	321	0.676		79.1139	5.57052	0.0732	0.0086	n.d.	121.9	7.9	81	2.8	1019	119		78.4	2.7		-50.4938	-1158.02
17SGM48C_15	570	1.221		79.3021	5.09395	0.0697	0.0043	n.d.	116.1	4.9	80.8	2.6	919	63		78.5	2.5		-43.6881	-1037.38
17SGM48R_19	305	1.54		77.1605	3.98901	0.091	0.01	n.d.	152.9	8.6	83	2.1	1446	105		78.5	2		-84.2169	-1642.17
17SGM48C_18	823	0.787		80.4505	6.40756	0.0556	0.0045	n.d.	92.4	5	79.6	3.2	435	90		78.8	3.1		-16.0804	-446.482
17SGM48C_3	670	0.863		80.4505	3.04197	0.0559	0.0033	n.d.	92.9	3.1	79.6	1.5	447	66		78.8	1.5		-16.7085	-461.558
17SGM48C_23	499	0.745		80	12.8	0.0584	0.0041	n.d.	97.3	8.1	80.1	6.4	544	77		79	6.3		-21.4732	-579.151
17SGM48C_30	694	0.578		80.9717	4.13054	0.0485	0.0025	n.d.	80.5	2.8	79.1	2	123	61		79	2		-1.76991	-55.4994
17SGM48C_10	657	0.763		80.6452	4.8127	0.0503	0.0031	n.d.	83.7	3.4	79.4	2.4	208	71		79.2	2.3		-5.41562	-161.965
17SGM48C_5	1348	0.886		80.5802	4.02576	0.0507	0.0025	n.d.	84.4	2.8	79.5	2	226	57		79.2	2		-6.16352	-184.277
17SGM48C_12	660	1.008		79.6813	4.88881	0.0585	0.0033	n.d.	97.9	3.9	80.4	2.5	548	62		79.3	2.4		-21.7662	-581.592
17SGM48R_28	291	4.3		77.2798	5.07634	0.0819	0.0087	n.d.	138.4	8.1	82.9	2.7	1242	104		79.3	2.6		-66.9481	-1398.19
17SGM48C_4	729	0.794		80.0641	3.20513	0.0525	0.0032	n.d.	87.8	3.1	80	1.6	306	69		79.5	1.6		-9.75	-282.5
17SGM48R_9	404	1.269		79.9361	3.96166	0.0527	0.004	n.d.	88.3	3.8	80.1	2	315	86		79.6	2		-10.2372	-293.258
17SGM48C_20	693	0.721		79.4281	4.47927	0.0559	0.005	n.d.	94	4.7	80.7	2.3	447	99		79.8	2.2		-16.4808	-453.903
17SGM48C_29	697	0.766		79.3651	4.72411	0.0528	0.0035	n.d.	89.1	3.8	80.7	2.4	319	75		80.2	2.4		-10.4089	-295.291
17SGM48C_24	651	1.542		75.3012	5.50016	0.0908	0.0098	n.d.	156.1	9.4	85	3.1	1442	103		80.4	2.9		-83.6471	-1596.47
17SGM48R_16	231	1.34		76.6871	4.35188	0.0752	0.0073	n.d.	128.7	6.8	83.5	2.4	1073	97		80.6	2.3		-54.1317	-1185.03
17SGM48R_7	214	1.32		75.643	3.3759	0.0834	0.0073	n.d.	143.6	6.6	84.7	1.9	1278	85		80.9	1.8		-69.5396	-1408.85
17SGM48C_19	587	0.761		78.5546	5.67716	0.0525	0.003	n.d.	89.5	3.9	81.5	2.9	306	65		81	2.9		-9.81595	-275.46
17SGM48R_26	344	0.81		74.6269	5.56917	0.092	0.011	n.d.	159	10	85.8	3.2	1467	114		81	3		-85.3147	-1609.79
17SGM48R_6	266	1.6		73.2601	4.77666	0.106	0.013	n.d.	185	12	87.4	2.8	1731	113		81	2.6		-111.67	-1880.55
17SGM48R_21	203	1.31		76.5697	3.86952	0.0723	0.0083	n.d.	124.2	7.3	83.6	2.1	993	117		81.1	2		-48.5646	-1087.8
17SGM48R_10	250	1.36		74.0741	5.32236	0.096	0.011	n.d.	167	10	86.4	3.1	1547	108		81.2	2.9		-93.287	-1690.51
17SGM48R_14	259	1.44		75.815	3.33379	0.0748	0.0071	n.d.	129.5	6.4	84.5	1.8	1062	95		81.6	1.8		-53.2544	-1156.8
17SGM48R_4	290	1.59		76.1615	3.77037	0.0716	0.0085	n.d.	123.7	7.5	84.1	2.1	974	121		81.6	2		-47.0868	-1058.15
17SGM48C_2	851	0.646		78.3699	4.11503	0.048	0.0028	n.d.	82.3	3.1	81.7	2.1	98	69		81.7	2.1		-0.734394	-19.951
17SGM48C_6	721	1.546		77.5795	3.67133	0.0539	0.0028	n.d.	92.8	3.1	82.6	1.9	366	59		81.9	1.9		-12.3487	-343.099
17SGM48C_11	466	0.829		77.821	3.45198	0.0503	0.0037	n.d.	86.6	3.6	82.3	1.8	208	85		82	1.8		-5.22479	-152.734
17SGM48R_8	367	1.017		75.9878	3.92642	0.0679	0.0064	n.d.	117.9	6	84.3	2.2	865	98		82.1	2.1		-39.8577	-926.097
17SGM48R_17	356	1.69		77.0416	4.74833	0.0524	0.0033	n.d.	91	3.8	83.1	2.5	302	72		82.6	2.5		-9.50662	-263.418
17SGM48R_27	179	1.691		73.8552	4.14549	0.0823	0.0092	n.d.	145.1	8.5	86.7	2.4	1252	109		82.9	2.3		-67.3587	-1344.06
17SGM48C_16	516	0.835		76.9231	7.10059	0.0501	0.0031	n.d.	87.3	4.6	83.3	3.8	199	72		83	3.8		-4.80192	-138.896
17SGM48C_9	497	0.926		75.5858	4.68483	0.0542	0.0039	n.d.	95.7	4.3	84.7	2.6	378	81		84	2.6		-12.987	-346.281
17SGM48R_13	259	1.036		73.1529	5.1908	0.076	0.011	n.d.	136	10	87.5	3.1	1094	145		84.4	3		-55.4286	-1150.29
17SGM48R_5	178	1.655		73.7463	3.20873	0.0665	0.0071	n.d.	118.9	6.5	86.8	1.9	821	111		84.8	1.8		-36.9816	-845.853
17SGM48R_29	245	1.46		65.7895	4.32825	0.148	0.018	n.d.	274	17	97.2	3.2	2322	104		85	2.8		-181.893	-2288.89
17SGM48C_7	740	0.701		74.7943	4.69912	0.0473	0.0029	n.d.	84.9	3.6	85.6	2.7	63	73		85.7	2.7		0.817757	26.4019
17SGM48R_2	196	0.624		72.2543	4.90745	0.063	0.0093	n.d.	115.2	8.8	88.6	3	707	157		86.9	2.9		-30.0226	-697.968
17SGM48C_8	873	0.828		73.0994	5.29009	0.0525	0.0034	n.d.	95.8	4.4	87.6	3.1	306	74		87.1	3.1		-9.36073	-249.315
17SGM48R_1	279	1.446		71.7875	4.12276	0.0597	0.0069	n.d.	110.2	6.7	89.2	2.5	592	125		87.8	2.5		-23.5426	-563.677
17SGM48R_11	235	1.066		66.8896	4.11629	0.113	0.014	n.d.	213	13	95.7	2.9	1847	112		87.9	2.7		-122.571	-1829.99
17SGM48R_25	194	1.91		70.4225	5.45527	0.0659	0.0087	n.d.	123.2	8.9	90.9	3.5	802	138		88.8	3.4		-35.5336	-782.288
								n.d.
17SGM50R_17	1002	10.89		100.806	7.51984	0.0516	0.0039	n.d.	69.2	3.6	63.6	2.4	267	87		63.3	2.3		-8.80503	-319.811
17SGM50R_23	122.3	2.079		88.8889	5.45185	0.0519	0.0047	n.d.	78.6	4.1	72.1	2.2	280	104		71.7	2.2		-9.01526	-288.35
17SGM50R_13	121	1.96		84.6024	4.65241	0.0551	0.0068	n.d.	87.3	5.6	75.7	2.1	415	138		75	2.1		-15.3236	-448.217
17SGM50R_18	91.2	1.515		81.8331	6.09395	0.076	0.013	n.d.	122	11	78.3	2.9	1094	171		75.5	2.8		-55.811	-1297.19
17SGM50R_22	131	2.28		82.6446	8.87917	0.0627	0.0075	n.d.	101	7.7	77.5	4.1	697	127		76.1	4.1		-30.3226	-799.355
17SGM50C_7	3680	23		83.612	3.5654	0.0513	0.0023	n.d.	82.4	2.4	76.6	1.6	253	52		76.3	1.6		-7.5718	-230.287
17SGM50R_20	109.3	1.48		83.8926	6.33417	0.0484	0.0054	n.d.	77.7	5	76.4	2.9	118	132		76.3	2.9		-1.70157	-54.4503
17SGM50R_15	181.4	2.7		83.0565	5.79464	0.0522	0.0036	n.d.	84.3	4	77.2	2.7	293	79		76.7	2.7		-9.19689	-279.534
17SGM50R_16	69.7	1.766		80.6452	8.45473	0.0638	0.0067	n.d.	105.1	7.4	79.4	4.1	734	111		77.8	4.1		-32.3678	-824.433
17SGM50R_21	116	1.826		78.8022	6.02349	0.0773	0.0097	n.d.	128.8	8.9	81.3	3.1	1128	125		78.3	3		-58.4256	-1287.45
17SGM50R_14	113	1.608		80.6452	6.50364	0.0581	0.0066	n.d.	96.1	6.4	79.4	3.2	533	124		78.4	3.1		-21.0327	-571.285
17SGM50C_12	1880	8.16		80.5802	4.74001	0.0456	0.0021	n.d.	76.3	2.7	79.5	2.3	0.0002	53.6289		79.7	2.3		4.02516	99.9997
17SGM50C_18	2970	8.59		76.746	4.82975	0.0723	0.0038	n.d.	123.9	4.8	83.5	2.6	993	53		80.9	2.5		-48.3832	-1089.22
17SGM50R_11	119.5	1.678		77.1605	4.82253	0.0573	0.0057	n.d.	98.9	5.5	83	2.6	502	109		82	2.5		-19.1566	-504.819
17SGM50C_15	375	4.71		77.8816	4.30654	0.0482	0.0032	n.d.	83.1	3.4	82.2	2.3	108	78		82.2	2.3		-1.09489	-31.3869
17SGM50C_24	900	4.23		77.9423	5.52826	0.0471	0.0029	n.d.	81.2	3.7	82.2	2.9	53	73		82.2	2.9		1.21655	35.5231
17SGM50C_28	69.1	1.817		75.5858	3.71359	0.0589	0.0072	n.d.	103.6	6.5	84.7	2.1	562	133		83.5	2		-22.314	-563.518
17SGM50R_12	96	2.32		75.188	3.505	0.0593	0.0055	n.d.	104.8	5.2	85.2	2	577	101		83.9	1.9		-23.0047	-577.23
17SGM50C_30	92	1.695		74.2942	3.42217	0.0647	0.0073	n.d.	115.1	6.6	86.2	2	764	119		84.4	1.9		-33.5267	-786.311
17SGM50C_8	451	3.05		75.7576	3.44353	0.0491	0.0026	n.d.	86.9	2.9	84.5	1.9	152	62		84.4	1.9		-2.84024	-79.8817
17SGM50C_27	105.7	2.22		73.4214	3.88131	0.067	0.0091	n.d.	120.3	8.3	87.2	2.3	837	141		85.1	2.2		-37.9587	-859.862
17SGM50R_10	85.7	1.711		74.0741	5.48697	0.0592	0.0075	n.d.	106.1	7.4	86.4	3.2	573	138		85.2	3.1		-22.8009	-563.194
17SGM50C_20	780	1.86		74.5712	3.50335	0.0499	0.0034	n.d.	89.6	3.5	85.9	2	189	79		85.6	2		-4.30733	-120.023
17SGM50C_16	617	6.22		74.0741	6.58436	0.0467	0.0039	n.d.	84.6	5	86.4	3.8	33	100		86.6	3.8		2.08333	61.8056
17SGM50C_19	570	5.19		72.1501	4.00834	0.0572	0.0049	n.d.	105.3	5.1	88.7	2.4	498	94		87.7	2.4		-18.7148	-461.443
17SGM50R_7	415	4.38		72.5163	4.99569	0.0521	0.0038	n.d.	95.9	4.6	88.3	3	289	83		87.8	3		-8.60702	-227.293
17SGM50R_9	131	1.61		70.922	5.02993	0.07	0.01	n.d.	129.5	9.7	90.3	3.2	927	147		87.8	3.1		-43.4109	-926.578
17SGM50C_29	127.8	2.131		71.6332	4.87475	0.0551	0.0057	n.d.	102.3	6	89.4	3	415	116		88.6	3		-14.4295	-364.206
17SGM50C_3	220.9	2.442		70.4722	3.32744	0.0518	0.0041	n.d.	98	4.3	90.8	2.1	276	91		90.4	2.1		-7.92952	-203.965
17SGM50R_8	75.1	1.745		65.7895	4.32825	0.096	0.015	n.d.	186	14	97.2	3.2	1547	147		91.4	3		-91.358	-1491.56
17SGM50R_1	350	8.49		67.5676	6.39153	0.0684	0.0091	n.d.	133	10	94.7	4.4	880	138		92.3	4.3		-40.4435	-829.25
17SGM50C_9	2520	6.7		64.5578	3.66758	0.0713	0.0048	n.d.	143.9	5.9	99.1	2.8	965	69		96.2	2.7		-45.2069	-873.764
17SGM50R_5	131	1.66		64.9351	4.21656	0.064	0.011	n.d.	129	11	98.5	3.2	741	182		96.5	3.1		-30.9645	-652.284
17SGM50C_10	364	3.77		65.8762	3.60192	0.0514	0.0041	n.d.	103.7	4.8	97.1	2.6	258	92		96.7	2.6		-6.79712	-165.705
17SGM50R_6	75	1.652		59.1716	3.85141	0.1118	0.0097	n.d.	235	11	108	3.5	1828	79		99.4	3.2		-117.593	-1592.59
17SGM50R_4	108.7	1.69		63.3714	3.81513	0.0564	0.0055	n.d.	117.5	6.4	100.9	3	467	108		99.9	3		-16.4519	-362.834
17SGM50C_26	125	3.11		62.8931	6.32886	0.0543	0.0049	n.d.	114.2	7.3	101.7	5.1	383	101		100.9	5		-12.2911	-276.598
17SGM50C_14	178	2.47		62.1504	3.47641	0.0552	0.0054	n.d.	117.3	6.2	102.9	2.9	419	109		102	2.8		-13.9942	-307.191
17SGM50R_3	111.8	1.554		62.5391	3.63736	0.0494	0.004	n.d.	104.9	5	102.3	3	166	95		102.1	2.9		-2.54154	-62.2678
17SGM50R_2	134.4	1.742		62.1118	4.24366	0.0527	0.0053	n.d.	112.3	6.5	103	3.5	315	114		102.4	3.5		-9.02913	-205.825
17SGM50R_19	100.5	1.482		60.241	8.34664	0.0704	0.0074	n.d.	152	12	106.1	7.3	939	108		103.2	7.1		-43.2611	-785.014
17SGM50C_22	505	3.83		55.8659	6.5541	0.0681	0.0071	n.d.	158	11	114.4	6.6	871	108		111.5	6.5		-38.1119	-661.364
17SGM50C_6	1190	5.84		42.5532	4.34586	0.0752	0.0041	n.d.	221	12	149.7	7.6	1073	55		144.9	7.3		-47.6286	-616.767
17SGM50C_23	1020	6.93		33.4448	5.14536	0.0798	0.0042	n.d.	289	20	190	14	1191	52		183	14		-52.1053	-526.842
17SGM50C_11	767	7.13		30.1205	4.44549	0.0721	0.0033	n.d.	289	19	211	15	988	47		205	15		-36.9668	-368.246
17SGM50C_17	1630	1.8		26.3852	3.06319	0.0567	0.0034	n.d.	263	15	240	14	479	66		238	14		-9.58333	-99.5833
17SGM50C_25	1210	4.12		14.4092	1.22499	0.0705	0.0027	n.d.	523	19	433	18	942	39		425	17		-20.7852	-117.552
17SGM50C_4	1650	5		12.6582	2.083	0.1302	0.0098	n.d.	896	54	490	39	2100	66		447	36		-82.8571	-328.571
17SGM50C_13	384	1.412		7.36377	0.520561	0.0695	0.0026	n.d.	846	23	821	27	913	39		818	27		-3.04507	-11.2058
17SGM50C_5	242	0.64		6.72495	0.212557	0.0721	0.0024	n.d.	921	14	894	13	988	34		890	13		-3.02013	-10.5145
17SGM50C_2	637	1.6		6.2422	0.385754	0.0916	0.0039	n.d.	1123	25	958	28	1458	40		935	27		-17.2234	-52.1921
17SGM50C_21	91	1.081		6.0241	0.399187	0.0754	0.0031	n.d.	1018	25	990	30	1078	41		986	30		-2.82828	-8.88889
17SGM50C_1	94	0.97		3.31126	0.219289	0.1095	0.0037	n.d.	1742	31	1701	50	1790	31		1790	31		-2.41035	-5.23222
								n.d.
17SGM51R_9	1363	1.134		134.953	8.19551	0.0503	0.0023	n.d.	50.9	1.9	47.6	1.4	208	53		47.4	1.4		-6.93277	-336.975
17SGM51R_6	1760	2.22		128.041	9.01697	0.0527	0.0043	n.d.	56	2.9	50.2	1.8	315	93		49.8	1.7		-11.5538	-527.49
17SGM51R_7	142	1.281		124.224	8.48733	0.0596	0.0072	n.d.	65	4.4	51.7	1.8	588	131		50.9	1.7		-25.7253	-1037.33
17SGM51R_4	214	1.54		114.811	10.1497	0.07	0.011	n.d.	81.9	7.1	55.9	2.5	927	161		54.3	2.4		-46.5116	-1558.32
17SGM51R_2	328	4.03		110.497	8.66884	0.074	0.01	n.d.	89.6	6.7	58.1	2.3	1041	136		56.1	2.2		-54.2169	-1691.74
17SGM51R_1	37	1.539		108.108	7.83053	0.085	0.021	n.d.	104	13	59.4	2.1	1315	240		56.5	2		-75.0842	-2113.8
17SGM51R_5	330	2.21		111.235	8.29002	0.0522	0.0045	n.d.	63.6	3.5	57.7	2.1	293	98		57.3	2.1		-10.2253	-407.799
17SGM51R_13	481	3.54		101.112	6.54316	0.0564	0.006	n.d.	75.2	4.5	63.4	2	467	118		62.7	2		-18.612	-636.593
17SGM51R_11	89.9	1.328		91.3242	7.5061	0.083	0.015	n.d.	120	11	70.2	2.9	1268	176		67.1	2.7		-70.9402	-1706.27
17SGM51C_14	684	1.104		94.0734	5.39838	0.0546	0.0052	n.d.	78.1	4.2	68.2	1.9	395	107		67.5	1.9
17SGM51C_9	684	1.62		89.9281	5.98442	0.0496	0.0033	n.d.	74.4	3.4	71.3	2.4	175	78		71.1	2.4		-4.34783	-145.442
17SGM51C_12	567	2.56		88.3392	5.46267	0.0556	0.0045	n.d.	84.5	4.1	72.6	2.2	435	90		71.8	2.2		-16.3912	-499.174
17SGM51R_10	40.2	1.89		86.5052	6.06135	0.071	0.014	n.d.	109	11	74.1	2.6	956	202		71.9	2.5		-47.0985	-1190.15
17SGM51C_18	1840	4.4		85.3242	5.67858	0.0526	0.0032	n.d.	82.8	3.6	75.1	2.5	311	69		74.6	2.5		-10.253	-314.115
17SGM51C_23	511	2.32		84.0336	6.14363	0.0498	0.003	n.d.	79.7	3.6	76.3	2.8	185	70		76	2.8		-4.45609	-142.464
17SGM51C_25	416	1.102		83.0565	6.48448	0.0523	0.005	n.d.	84.5	5	77.2	3	298	109		76.7	3		-9.45596	-286.01
17SGM51R_12	49.5	1.665		74.6269	8.35375	0.13	0.029	n.d.	218	25	85.8	4.8	2097	196		76.9	4.3		-154.079	-2344.06
17SGM51C_21	441	1.5		83.1947	6.57529	0.0476	0.003	n.d.	77.1	3.8	77	3	78	75		77	3		-0.12987	-1.2987
17SGM51C_3	764	2.1		82.4402	5.77693	0.0547	0.0039	n.d.	88.8	4.3	77.7	2.7	399	80		77	2.7		-14.2857	-413.514
17SGM51C_24	475	1.41		82.1018	5.7296	0.0561	0.0042	n.d.	91.4	4.5	78	2.7	455	83		77.2	2.7		-17.1795	-483.333
17SGM51C_10	166	0.945		81.8331	5.82609	0.0567	0.0061	n.d.	92.6	5.7	78.3	2.8	479	119		77.4	2.7		-18.2631	-511.75
17SGM51R_14	1640	1.72		70.922	9.05387	0.161	0.036	n.d.	276	31	90.3	5.7	2465	189		77.4	4.9		-205.648	-2629.79
17SGM51C_7	746	2.07		81.103	4.93327	0.0536	0.0044	n.d.	88.5	4.3	79	2.4	353	93		78.4	2.4		-12.0253	-346.835
17SGM51C_8	296	0.976		80.9061	5.69485	0.0509	0.0036	n.d.	84.4	4	79.2	2.8	235	82		78.9	2.8		-6.56566	-196.717
17SGM51C_20	831	1.308		79.3021	4.8424	0.0521	0.0024	n.d.	88	3.2	80.8	2.5	289	53		80.3	2.4		-8.91089	-257.673
17SGM51C_22	358	5.97		79.8085	5.2229	0.0476	0.0037	n.d.	80.2	3.9	80.3	2.6	78	92		80.3	2.6		0.124533	2.86426
17SGM51C_2	1030	1.77		78.125	6.71387	0.0496	0.0032	n.d.	85.2	4.4	82	3.5	175	75		81.8	3.5		-3.90244	-113.415
17SGM51R_8	113.9	2.96		75.188	10.1758	0.077	0.011	n.d.	134	12	85.2	5.7	1120	142		82	5.5		-57.277	-1214.55
17SGM51R_15	94.7	1.7		75.358	4.88379	0.069	0.013	n.d.	121	11	85	2.7	898	194		82.7	2.7		-42.3529	-956.471
17SGM51C_26	1840	1.75		76.2777	5.64373	0.0573	0.005	n.d.	100	5.4	84	3.1	502	96		83	3		-19.0476	-497.619
17SGM51C_19	363	1.69		75.9301	3.7475	0.0488	0.0031	n.d.	86.2	3.3	84.3	2.1	137	75		84.2	2.1		-2.25386	-62.5148
17SGM51C_16	80.1	1.91		59.8802	3.94421	0.214	0.027	n.d.	407	24	106.8	3.5	2935	102		84.5	2.8		-281.086	-2648.13
17SGM51C_4	5000	2.24		58.1395	6.76041	0.221	0.03	n.d.	428	31	109.9	6.3	2987	109		86.1	5		-289.445	-2617.93
17SGM51C_13	582	1.76		69.4444	5.78704	0.0914	0.0096	n.d.	169	10	92.2	3.8	1454	100		87.1	3.6		-83.2972	-1477.01
17SGM51C_6	332	2.25		59.5238	6.02324	0.181	0.027	n.d.	355	27	107.4	5.4	2661	124		89.5	4.5		-230.54	-2377.65
17SGM51R_16	311	2.98		68.4932	3.61231	0.069	0.029	n.d.	132	26	93.4	2.4	898	434		91	2.4		-41.3276	-861.456
17SGM51R_28	431	2.59		69.3481	4.18397	0.051	0.0046	n.d.	98	5.1	92.3	2.8	240	104		91.9	2.8		-6.17551	-160.022
17SGM51R_3	141	2.66		42.5532	6.51879	0.353	0.052	n.d.	774	58	150	11	3719	112		92.6	7		-416	-2379.33
17SGM51C_1	280	1.3		67.7048	3.2546	0.0555	0.0051	n.d.	108.7	5.3	94.5	2.3	431	102		93.6	2.2		-15.0265	-356.085
17SGM51R_27	261	0.915		64.1026	4.93097	0.058	0.005	n.d.	119.3	6.5	99.8	3.8	529	94		98.5	3.8		-19.5391	-430.06
17SGM51R_26	504	1.81		64.5161	4.9948	0.0504	0.0028	n.d.	103.8	4.7	99.2	3.8	212	64		98.9	3.8		-4.6371	-113.71
17SGM51R_21	524	2.48		63.6943	4.86835	0.0531	0.0043	n.d.	110.4	5.8	100.4	3.8	332	92		99.8	3.8		-9.96016	-230.677
17SGM51R_17	45.6	2.03		61.3497	6.77481	0.0567	0.0095	n.d.	122	12	104.2	5.7	479	185		103.1	5.6		-17.0825	-359.693
17SGM51R_22	518	3.18		59.8802	3.94421	0.074	0.01	n.d.	160	11	106.8	3.5	1041	136		103.3	3.4		-49.8127	-874.719
17SGM51R_19	22	1.433		56.8182	5.48812	0.084	0.022	n.d.	188	24	112.5	5.4	1292	255		107.4	5.1		-67.1111	-1048.44
17SGM51R_24	226	1.376		59.1716	4.20153	0.0496	0.0053	n.d.	111	6.7	108	3.8	175	125		107.8	3.8		-2.77778	-62.037
17SGM51R_23	38.5	1.08		58.1395	3.71823	0.0584	0.0082	n.d.	131.6	9.5	109.9	3.5	544	153		108.5	3.4		-19.7452	-394.995
17SGM51R_20	58	1.31		55.8659	4.0573	0.081	0.013	n.d.	185	15	114.4	4.1	1221	158		109.7	3.9		-61.7133	-967.308
17SGM51R_25	349	1.98		51.5464	3.71984	0.0561	0.0078	n.d.	142	10	123.9	4.4	455	154		122.7	4.4		-14.6086	-267.232
17SGM51C_17	142	8.6		42.0168	3.17774	0.0555	0.0048	n.d.	169.8	9	151.6	5.7	431	96		150.4	5.6		-12.0053	-184.301
17SGM51R_18	669	3.82		27.3224	3.06071	0.0546	0.0043	n.d.	247	15	232	13	395	88		231	13		-6.46552	-70.2586
17SGM51C_11	334	4.91		13.5501	0.991473	0.0688	0.0033	n.d.	539	18	459	16	892	50		452	16		-17.4292	-94.3355
17SGM51C_15	362	4.32		7.8064	0.530177	0.0764	0.0052	n.d.	867	28	777	25	1105	68		767	25
17SGM51C_5	843	4.73		6.99301	0.537924	0.109	0.0058	n.d.	1164	32	862	31	1782	49		820	30		-35.0348	-106.729
17SGM52R_5	256	1.81		100.503	7.47456	0.0627	0.0064	n.d.	83.8	5.1	63.8	2.4	697	109		62.6	2.3		-31.348	-992.476
17SGM52R_8	390	1.829		98.5222	5.04744	0.0571	0.0067	n.d.	78	4.8	65.1	1.7	494	129		64.3	1.6		-19.8157	-658.833
17SGM52R_3	223	1.68		96.7118	5.51837	0.0525	0.0052	n.d.	73.3	4	66.3	1.9	306	113		65.9	1.9		-10.5581	-361.538
17SGM52R_1	315	2.52		96.3391	5.75436	0.0508	0.005	n.d.	71.2	4	66.6	2	231	114		66.3	2		-6.90691	-246.847
17SGM52R_2	204	1.85		95.511	5.47341	0.0509	0.0046	n.d.	72	3.7	67.1	1.9	235	104		66.8	1.9		-7.30253	-250.224
17SGM52R_6	254	1.72		94.8767	4.86085	0.0556	0.0064	n.d.	78.9	4.8	67.6	1.7	435	128		66.9	1.7		-16.716	-543.491
17SGM52R_4	268	1.895		93.1099	5.28836	0.0559	0.0047	n.d.	80.7	3.9	68.9	1.9	447	93		68.1	1.9		-17.1263	-548.766
17SGM52R_11	251	1.499		92.5926	5.5727	0.0557	0.0053	n.d.	80.9	4.4	69.2	2.1	439	106		68.5	2.1		-16.9075	-534.393
17SGM52R_10	322	1.687		92.2509	6.12737	0.0533	0.0058	n.d.	77.8	4.8	69.5	2.3	341	123		69	2.3		-11.9424	-390.647
17SGM52R_9	334	1.79		90.7441	7.98746	0.0517	0.0067	n.d.	76.8	5.8	70.7	3.1	271	149		70.3	3.1		-8.62801	-283.31
17SGM52R_12	340	1.638		88.968	5.77817	0.0604	0.0091	n.d.	90.8	7.1	72.1	2.3	617	163		70.9	2.3		-25.9362	-755.756
17SGM52R_7	285	1.68		86.9565	11.3422	0.06	0.013	n.d.	92	11	73.7	4.8	603	234		72.6	4.7		-24.8304	-718.182
17SGM52R_13	282	1.502		82.5764	6.61429	0.0568	0.0057	n.d.	92	5.6	77.6	3.1	483	111		76.7	3.1		-18.5567	-522.423
17SGM52R_15	390	1.68		81.6327	5.26447	0.0577	0.0086	n.d.	94.4	7.3	78.5	2.5	517	164		77.5	2.5		-20.2548	-558.599
17SGM52R_14	205	1.668		77.2201	4.71072	0.0558	0.0096	n.d.	96.4	8.4	82.9	2.5	443	191		82.1	2.5		-16.2847	-434.379
17SGM52R_16	350	1.7		75.7576	4.76354	0.0602	0.0048	n.d.	105.5	5.1	84.5	2.6	610	86		83.2	2.6		-24.8521	-621.893
17SGM52R_17	377	1.622		76.2195	4.35706	0.0506	0.0044	n.d.	88.9	4.4	84	2.4	222	101		83.7	2.4		-5.83333	-164.286
17SGM52R_18	373	1.68		74.6269	5.56917	0.059	0.0059	n.d.	105	6.2	85.8	3.2	566	109		84.6	3.1		-22.3776	-559.674
17SGM52R_23	528	2.93		74.0741	5.48697	0.0594	0.0047	n.d.	106.4	5.5	86.4	3.2	581	86		85.2	3.1		-23.1481	-572.454
17SGM52R_19	840	4.83		72.9927	5.00826	0.0508	0.0033	n.d.	93	4.2	87.7	3	231	75		87.4	3		-6.04333	-163.398
17SGM52R_24	245	1.232		65.3595	4.69905	0.0712	0.0093	n.d.	142	9.9	97.9	3.5	962	133		95	3.4		-45.046	-882.635
17SGM52R_20	324	1.64		64.5995	3.5054	0.0547	0.0054	n.d.	112.1	6	99	2.7	399	111		98.2	2.6		-13.2323	-303.03
17SGM52R_21	281	1.613		61.5006	3.55539	0.0679	0.0075	n.d.	143.8	8.4	104	3	865	115		101.4	2.9		-38.2692	-731.731
17SGM52R_22	241	1.535		60.35	3.6057	0.0692	0.0091	n.d.	149	10	105.9	3.1	904	136		103.1	3.1		-40.6988	-753.636
17SGM53R_12	6000	2.141		146.628	7.73987	0.0977	0.005	n.d.	89.2	3.1	43.8	1.2	1580	48		41	1.1		-103.653	-3507.31
17SGM53R_15	3230	2.15		110.254	7.9013	0.0654	0.0046	n.d.	79.8	3.9	58.2	2.1	786	74		56.9	2		-37.1134	-1250.52
17SGM53R_23	6240	3.25		106.838	3.995	0.0678	0.0032	n.d.	85.1	2.5	60.1	1.1	862	49		58.5	1.1		-41.5973	-1334.28
17SGM53R_13	3100	2.71		102.249	5.12293	0.0995	0.0069	n.d.	127.8	5.1	62.7	1.6	1614	65		58.6	1.5		-103.828	-2474.16
17SGM53R_1	4350	2.75		104.058	6.17203	0.0696	0.0042	n.d.	89.5	3.6	61.7	1.8	916	62		59.9	1.8		-45.0567	-1384.6
17SGM53R_17	3840	2.83		94.2507	7.63955	0.136	0.011	n.d.	184.2	9.6	68	2.7	2176	70		60.5	2.4		-170.882	-3100
17SGM53R_11	208	1.508		96.2464	5.55802	0.101	0.022	n.d.	137	14	66.6	1.9	1642	202		62.1	1.8		-105.706	-2365.47
17SGM53R_8	5000	2.84		95.1475	3.62122	0.0558	0.0024	n.d.	78.9	2.2	67.4	1.3	443	48		66.7	1.3		-17.0623	-557.27
17SGM53R_20	1548	1.309		94.4287	4.10172	0.0547	0.0021	n.d.	78	2.2	67.9	1.5	399	43		67.3	1.5		-14.8748	-487.629
17SGM53R_22	1323	0.91		92.5926	5.0583	0.0544	0.0034	n.d.	79.1	3.2	69.2	1.9	387	70		68.6	1.9		-14.3064	-459.249
17SGM53R_3	2780	2.81		92.6784	5.23947	0.0517	0.0027	n.d.	75.2	2.8	69.2	1.9	271	60		68.8	1.9		-8.67052	-291.618
17SGM53R_18	1070	1.996		90.7441	2.88207	0.0521	0.0024	n.d.	77.3	2.1	70.7	1.1	289	53		70.2	1.1		-9.33522	-308.769
17SGM53R_25	1042	1.458		89.6057	2.81022	0.0571	0.0026	n.d.	85.5	2.3	71.5	1.1	494	50		70.7	1.1		-19.5804	-590.909
17SGM53R_16	1870	1.981		89.6861	5.63052	0.0504	0.0022	n.d.	75.7	2.8	71.5	2.2	212	51		71.2	2.2		-5.87413	-196.503
17SGM53R_2	1157	1.381		87.0322	6.43841	0.066	0.01	n.d.	100.9	8.1	73.6	2.7	805	159		71.9	2.6		-37.0924	-993.75
17SGM53R_24	274	2.65		86.5801	6.7465	0.0707	0.0056	n.d.	108.3	5.7	74	2.9	948	81		71.9	2.8		-46.3514	-1181.08
17SGM53R_7	1900	1.56		88.4173	5.15963	0.0496	0.0018	n.d.	75.6	2.5	72.5	2.1	175	42		72.3	2.1		-4.27586	-141.379
17SGM53R_6	396	1.304		85.4701	2.77595	0.0707	0.005	n.d.	109.6	4	75	1.2	948	72		72.8	1.2		-46.1333	-1164
17SGM53R_19	675	2.01		87.108	3.33863	0.0481	0.0024	n.d.	74.5	2.3	73.6	1.4	103	59		73.5	1.4		-1.22283	-39.9457
17SGM53R_5	523	1.849		84.5309	2.50091	0.0662	0.0074	n.d.	104.1	5.7	75.8	1.1	812	117		74	1.1		-37.3351	-971.24
17SGM53R_14	780	1.801		81.367	4.23717	0.0832	0.0073	n.d.	133.9	6.4	78.7	2	1273	86		75.2	1.9		-70.1398	-1517.53
17SGM53R_4	984	1.399		84.246	3.40675	0.0513	0.0021	n.d.	81.8	2.3	76.1	1.5	253	47		75.7	1.5		-7.49014	-232.457
17SGM53R_9	1210	1.51		84.3882	1.78034	0.0494	0.0014	n.d.	78.8	1.3	75.9	0.8	166	33		75.8	0.8		-3.82082	-118.709
17SGM53R_21	828	1.418		80.7754	4.11054	0.0545	0.002	n.d.	90.3	2.7	79.3	2	391	41		78.6	2		-13.8714	-393.064
17SGM53C_3	558	0.751		79.4281	2.33427	0.0573	0.0029	n.d.	96.2	2.7	80.7	1.2	502	56		79.7	1.2		-19.2069	-522.057
17SGM53C_1	149	3.57		73.8007	3.59472	0.092	0.012	n.d.	161	10	86.8	2.1	1467	124		81.9	2		-85.4839	-1590.09
17SGM53R_10	246	0.98		70.4225	6.94307	0.067	0.011	n.d.	125	11	90.9	4.4	837	171		88.7	4.3		-37.5138	-820.792
17SGM53C_2	820	0.652		69.8324	4.58397	0.074	0.011	n.d.	138	11	91.7	3	1041	150		88.7	2.9		-50.4907	-1035.22
17SGM53C_6	805	1.44		70.2741	2.51861	0.066	0.0041	n.d.	123.6	4.2	91.1	1.6	805	65		89	1.6		-35.6751	-783.644
17SGM53C_5	286	1		67.1592	2.43559	0.095	0.013	n.d.	181	12	95.3	1.7	1527	129		89.7	1.6		-89.9265	-1502.31
17SGM53C_4	354	0.697		68.9655	6.18312	0.0636	0.005	n.d.	121.5	6.8	92.8	4.1	727	83		91	4		-30.9267	-683.405
17SGM53C_9	431	0.657		65.3168	3.54101	0.0813	0.0054	n.d.	160.8	6.4	97.9	2.6	1228	65		93.9	2.5		-64.2492	-1154.34
17SGM53C_8	195.1	1.107		61.5385	2.0071	0.0805	0.0058	n.d.	168.3	6.1	103.9	1.7	1208	71		99.7	1.6		-61.9827	-1062.66
17SGM53C_10	531	0.515		61.0128	3.27586	0.0664	0.0049	n.d.	141.9	6	104.8	2.8	818	77		102.4	2.7		-35.4008	-680.534
17SGM53C_7	880	0.804		53.7634	3.17956	0.151	0.028	n.d.	332	28	118.8	3.5	2357	158		103.5	3		-179.461	-1884.01
17SGM53C_12	833	1.138		42.0168	3.70737	0.279	0.054	n.d.	660	52	151.6	6.6	3357	151		107.9	4.7		-335.356	-2114.38
17SGM53C_11	364	0.83		57.5374	1.8208	0.0651	0.004	n.d.	147.1	4.7	111.1	1.7	777	65		108.7	1.7		-32.4032	-599.37
17SGM53C_13	448	1.088		50.7614	2.57672	0.0939	0.0078	n.d.	231	10	125.8	3.2	1505	78		118.6	3		-83.6248	-1096.34
17SGM53C_14	419	1.091		48.1696	2.2971	0.0677	0.0031	n.d.	179.8	5.4	132.5	3.1	858	48		129.3	3.1		-35.6981	-547.547
17SGM53C_16	118	1.98		42.9185	1.84199	0.0779	0.0074	n.d.	227	11	148.5	3.1	1143	94		143.1	3		-52.862	-669.697
17SGM53C_15	223	0.868		39.2157	2.15302	0.126	0.021	n.d.	372	27	162.3	4.4	2042	147		146.8	4		-129.205	-1158.16
17SGM53C_18	6420	2.97		41.841	2.1008	0.0734	0.003	n.d.	219.9	6.4	152.3	3.8	1024	41		147.6	3.7		-44.3861	-572.357
17SGM53C_17	463	0.587		41.6146	1.57592	0.0652	0.0022	n.d.	198.5	4.6	153.1	2.9	780	35		150	2.8		-29.6538	-409.471
17SGM53C_20	652	0.777		39.6825	1.73217	0.064	0.0023	n.d.	203.8	5.2	160.4	3.5	741	38		157.5	3.4		-27.0574	-361.97
17SGM53C_21	704	0.893		37.1747	1.38196	0.0679	0.0026	n.d.	228	5.4	171.1	3.1	865	40		167.2	3.1		-33.2554	-405.552
17SGM53C_23	718	1.546		35.2858	0.884013	0.0697	0.0027	n.d.	244.5	5	180.2	2.2	919	40		175.7	2.2		-35.6826	-409.989
17SGM53C_25	1110	1.79		34.7222	2.17014	0.074	0.012	n.d.	261	20	183	5.6	1041	164		177.5	5.5		-42.623	-468.852
17SGM53C_24	453	0.876		33.8983	1.49382	0.0694	0.0031	n.d.	252.4	7	187.4	4.1	910	46		182.9	4		-34.6852	-385.592
17SGM53C_26	719	6.89		7.06215	0.234407	0.0752	0.0022	n.d.	917	13	854	13	1073	29		846	13		-7.37705	-25.644
17SGM53C_27	70.4	2.095		2.05761	0.0846754	0.135	0.015	n.d.	2342	54	2553	43	2163	97		2661	45		8.26479	15.2761
17SGM53C_19	838	8.34		1.81159	0.0853287	0.1379	0.003	n.d.	2479	24	2833	54	2200	19		3078	58		12.4956	22.3438
17SGM53C_22	1293	2.11		1.66667	0.0583333	0.1318	0.0022	n.d.	2515	18	3030	42	2121	15		3520	47		16.9967	30
								n.d.
17SGM54C_8	418	0.98		89.3655	3.9931	0.0502	0.0024	n.d.	75.7	2.4	71.7	1.6	203	55		71.5	1.6		-5.5788	-183.124
17SGM54C_10	267	2.87		88.4956	3.91573	0.0526	0.0023	n.d.	79.9	2.4	72.4	1.6	311	50		72	1.6		-10.3591	-329.558
17SGM54C_13	597	1.124		87.7963	4.47075	0.0555	0.0025	n.d.	84.8	2.8	73	1.8	431	50		72.3	1.8		-16.1644	-490.411
17SGM54C_23	1240	1.56		87.4126	6.18918	0.0514	0.0022	n.d.	79.1	3.1	73.3	2.6	258	49		73	2.6		-7.91269	-251.978
17SGM54C_2	175.9	0.819		85.6164	4.69131	0.0535	0.0029	n.d.	83.9	3.1	74.9	2	349	61		74.3	2		-12.016	-365.955
17SGM54C_14	7300	2.09		84.7458	7.90003	0.0522	0.0018	n.d.	82.7	3.9	75.6	3.5	293	39		75.2	3.5		-9.39153	-287.566
17SGM54C_21	414	0.903		84.1751	5.24323	0.0509	0.0026	n.d.	81.3	3.1	76.1	2.4	235	59		75.8	2.3		-6.83311	-208.804
17SGM54C_22	889	1.12		81.9672	7.39049	0.0518	0.0024	n.d.	84.8	4.1	78.2	3.5	276	53		77.8	3.5		-8.4399	-252.941
17SGM54C_20	2151	9.21		68.8231	2.93671	0.175	0.017	n.d.	305	14	93	2	2605	81		78.1	1.7		-227.957	-2701.08
17SGM54C_7	660	0.89		80.8407	3.07156	0.0588	0.0048	n.d.	97	4.2	79.3	1.5	559	89		78.1	1.5		-22.3203	-604.918
17SGM54C_24	9420	2		80.6452	4.03226	0.049	0.002	n.d.	81.7	2.5	79.4	2	147	48		79.3	2		-2.89673	-85.1385
17SGM54C_15	470	2.31		78.4929	3.94313	0.0608	0.0076	n.d.	103	6.6	81.6	2	631	135		80.3	2		-26.2255	-673.284
17SGM54C_18	10700	1.474		79.1139	5.57052	0.0505	0.0023	n.d.	85.6	3.4	81	2.8	217	53		80.7	2.8		-5.67901	-167.901
17SGM54C_5	2900	2.73		78.9266	5.98023	0.0526	0.002	n.d.	89.2	3.6	81.2	3.1	311	43		80.7	3		-9.85222	-283.005
17SGM54C_11	208	0.742		78.2473	2.69396	0.0533	0.0038	n.d.	91.1	3.4	81.9	1.4	341	81		81.3	1.4		-11.2332	-316.361
17SGM54C_6	73.3	2.573		72.3589	3.76978	0.0597	0.004	n.d.	109.4	4.4	88.5	2.3	592	73		87.2	2.3		-23.6158	-568.927
17SGM54C_17	144	1.489		70.7714	3.50601	0.0514	0.0031	n.d.	96.9	3.6	90.5	2.2	258	69		90	2.2		-7.07182	-185.083
17SGM54C_3	366	1.393		70.1262	4.13086	0.0537	0.0027	n.d.	101.9	3.8	91.3	2.7	357	57		90.6	2.7		-11.6101	-291.019
17SGM54C_9	408	1.65		67.1141	4.95473	0.0521	0.0019	n.d.	103.2	4	95.3	3.5	289	42		94.8	3.5		-8.28961	-203.253
17SGM54C_4	140.6	0.671		66.7111	3.38229	0.0527	0.0028	n.d.	104.9	3.7	95.9	2.4	315	60		95.3	2.4		-9.38478	-228.467
17SGM54C_16	890	4.8		14.4928	5.46104	0.0803	0.0076	n.d.	576	85	430	78	1203	93		417	76		-33.9535	-179.767
17SGM54C_12	951	41.2		3.96668	0.113289	0.0998	0.0016	n.d.	1520	13	1449	19	1620	15		1435	18		-4.89993	-11.8012
17SGM54C_19	1180	1.499		3.48432	0.24281	0.1081	0.0028	n.d.	1689	31	1627	50	1767	24		1612	50		-3.81069	-8.60479
17SGM54C_1	215	2.68		3.44828	0.214031	0.1083	0.0036	n.d.	1699	29	1642	45	1770	30		1628	45		-3.47138	-7.79537
								n.d.
17SGM55R_17	305	1.82		92.8505	5.17273	0.0619	0.0048	n.d.	89.3	4.1	69.1	1.9	670	83		67.8	1.9		-29.233	-869.609
17SGM55C_27	753	4.11		93.4579	4.01782	0.0474	0.0017	n.d.	68.6	1.9	68.6	1.5	68	43		68.6	1.5		0	0.874636
17SGM55R_20	599	1.535		88.3392	5.46267	0.0606	0.0032	n.d.	91.7	3.6	72.6	2.2	624	57		71.4	2.2		-26.3085	-759.504
17SGM55R_8	170	2.193		85.9107	3.76413	0.0778	0.0091	n.d.	119.4	7	74.6	1.6	1141	116		71.8	1.6		-60.0536	-1429.49
17SGM55R_23	522	3.11		86.9565	4.53686	0.052	0.0027	n.d.	80.4	2.8	73.7	1.9	284	59		73.3	1.9		-9.09091	-285.346
17SGM55R_24	265	14.56		86.7303	5.2655	0.0534	0.0044	n.d.	82.7	4.1	73.9	2.2	345	93		73.4	2.2		-11.908	-366.847
17SGM55R_10	852	2.77		84.5309	4.78746	0.0608	0.0035	n.d.	96	3.7	75.8	2.1	631	62		74.6	2.1		-26.6491	-732.454
17SGM55C_13	227	1.253		84.3882	5.1986	0.0525	0.0026	n.d.	83.5	3.2	75.9	2.3	306	56		75.5	2.3		-10.0132	-303.162
17SGM55R_4	1160	1.17		83.1947	2.28405	0.0488	0.0016	n.d.	78.9	1.6	77	1.1	137	39		76.9	1		-2.46753	-77.9221
17SGM55C_24	2600	1.275		81.6327	3.5985	0.0458	0.0015	n.d.	75.6	2	78.5	1.7	0.0002	37.1181		78.7	1.7		3.69427	99.9997
17SGM55R_12	221	1.58		76.6284	5.28471	0.0938	0.0095	n.d.	158.3	9	83.6	2.9	1503	96		78.7	2.7		-89.3541	-1697.85
17SGM55C_10	130	0.865		80.5802	4.35042	0.0544	0.0037	n.d.	90.3	3.8	79.5	2.1	387	76		78.8	2.1		-13.5849	-386.792
17SGM55R_14	268	2.59		78.7402	8.68002	0.0501	0.0041	n.d.	85.3	5.6	81.4	4.5	199	95		81.1	4.4		-4.79115	-144.472
17SGM55R_15	481	4.82		77.5194	6.00925	0.0581	0.0042	n.d.	99.8	5	82.6	3.2	533	79		81.5	3.1		-20.8232	-545.278
17SGM55C_5	680	3.97		75.9878	3.52223	0.0503	0.0023	n.d.	88.6	2.8	84.3	1.9	208	53		84	1.9		-5.10083	-146.738
17SGM55C_16	97	2.813		65.2742	3.70682	0.0519	0.005	n.d.	105.6	5.6	98	2.8	280	110		97.5	2.7		-7.7551	-185.714
17SGM55R_16	246	1.531		54.6448	4.77769	0.0748	0.0086	n.d.	175	12	116.9	5.1	1062	116		113	4.9		-49.7006	-808.469
17SGM55R_19	898	2.01		45.208	1.77807	0.0504	0.0017	n.d.	145.1	3.5	141	2.7	212	39		140.8	2.7		-2.9078	-50.3546
17SGM55R_6	819	2.008		29.6736	1.93715	0.0905	0.0036	n.d.	356	11	213.7	6.9	1435	38		203.1	6.5		-66.5887	-571.502
17SGM55C_19	217	1.36		25.3807	1.22394	0.0519	0.0018	n.d.	252.1	6.6	249.1	5.9	280	40		248.9	5.9		-1.20434	-12.4047
17SGM55R_9	386	6.38		23.2558	4.11033	0.078	0.004	n.d.	386	30	271	23	1146	51		263	23		-42.4354	-322.878
17SGM55R_25	600	10.75		21.5054	1.38744	0.0877	0.0026	n.d.	453	13	293	9.2	1375	29		280.2	8.8		-54.6075	-369.283
17SGM55R_22	558	1.945		18.1818	2.04959	0.0795	0.0028	n.d.	479	23	345	19	1184	35		334	18		-38.8406	-243.188
17SGM55R_11	637	4.43		16.6667	0.833333	0.0926	0.0024	n.d.	577	12	375.6	9.1	1479	25		358	8.7		-53.6209	-293.77
17SGM55C_21	281	1.492		12.0048	0.504403	0.0598	0.0019	n.d.	531	11	516	10	595	34		514	10		-2.90698	-15.3101
17SGM55C_22	483	5.34		6.84932	0.516044	0.0931	0.0024	n.d.	1072	26	879	31	1489	24		853	30		-21.9568	-69.397
17SGM55R_2	456	1.26		5.58659	0.46815	0.0892	0.003	n.d.	1181	32	1062	41	1408	32		1044	40		-11.2053	-32.58
17SGM55R_13	234	2.596		5.29101	0.447916	0.1005	0.0016	n.d.	1306	32	1116	43	1633	15		1086	42		-17.0251	-46.3262
17SGM55R_18	279	6.23		5.15464	0.292273	0.0872	0.0028	n.d.	1222	23	1143	30	1364	31		1131	29		-6.91164	-19.3351
17SGM55C_26	511	1.12		5	0.25	0.0881	0.0031	n.d.	1251	22	1175	27	1384	34		1163	27		-6.46809	-17.7872
17SGM55C_15	354	1.785		4.81696	0.213468	0.0889	0.0024	n.d.	1285	19	1216	25	1401	26		1205	24		-5.67434	-15.2138
17SGM55R_7	202	1.814		4.58716	0.231462	0.1033	0.0029	n.d.	1434	22	1271	29	1683	26		1242	29		-12.8245	-32.4154
17SGM55C_14	130	1.916		4.38596	0.28855	0.0938	0.0027	n.d.	1394	27	1324	39	1503	27		1311	39		-5.28701	-13.5196
17SGM55R_21	493	10.2		4.21941	0.178034	0.093	0.0026	n.d.	1417	19	1371	26	1487	26		1363	26		-3.35522	-8.46098
17SGM55R_1	657	4.01		4.03226	0.227627	0.1051	0.0034	n.d.	1548	26	1428	36	1715	30		1404	36		-8.40336	-20.098
17SGM55R_3	433	6.86		4.06504	0.198295	0.0941	0.0027	n.d.	1455	22	1418	31	1509	27		1411	31		-2.60931	-6.41749
17SGM55C_29	373	3.62		4.06504	0.18177	0.092	0.0028	n.d.	1437	21	1418	28	1467	29		1414	28		-1.33992	-3.45557
17SGM55R_26	175.4	2.77		4.06504	0.165246	0.0901	0.0021	n.d.	1421	18	1418	26	1427	22		1417	26		-0.211566	-0.634697
17SGM55C_1	832	35.1		3.81243	0.124998	0.0889	0.0027	n.d.	1460	17	1502	22	1401	29		1510	22		2.79627	6.72437
17SGM55C_3	2338	9.23		3.74532	0.154302	0.1021	0.0029	n.d.	1584	20	1526	28	1662	26		1513	28		-3.80079	-8.91219
17SGM55C_18	105.6	2.158		3.77358	0.170879	0.0942	0.002	n.d.	1514	20	1515	31	1511	20		1516	31		0.0660066	0.264026
17SGM55R_5	157	3.21		3.74532	0.140274	0.0993	0.0029	n.d.	1561	19	1526	25	1610	27		1518	25		-2.29358	-5.50459
17SGM55C_28	1040	4.58		3.72856	0.118168	0.0969	0.0025	n.d.	1545	16	1532	22	1564	24		1529	22		-0.848564	-2.08877
17SGM55C_30	868	19.6		3.67512	0.118857	0.0966	0.0026	n.d.	1554	17	1551	22	1559	25		1551	22		-0.193424	-0.515796
17SGM55C_7	408	2.218		3.61011	0.143362	0.0998	0.0023	n.d.	1595	18	1576	28	1620	21		1572	28		-1.20558	-2.79188
17SGM55C_20	1536	8.9		3.61011	0.156395	0.0971	0.0026	n.d.	1573	20	1576	30	1568	25		1577	30		0.190355	0.507614
17SGM55C_17	501	11.95		3.58423	0.15416	0.097	0.0025	n.d.	1578	20	1586	30	1566	24		1588	30		0.504414	1.26103
17SGM55C_4	445	1.917		3.53357	0.137347	0.0984	0.0025	n.d.	1601	19	1606	28	1593	24		1608	28		0.311333	0.809465
17SGM55C_25	735	2.21		3.48432	0.169967	0.0993	0.0023	n.d.	1619	22	1627	35	1610	22		1628	35		0.491703	1.04487
17SGM55C_8	1210	2.041		3.47222	0.13262	0.1017	0.0027	n.d.	1642	19	1632	28	1655	25		1629	27		-0.612745	-1.40931
17SGM55C_9	329	2.95		3.44828	0.20214	0.0993	0.0024	n.d.	1628	26	1642	42	1610	23		1645	43		0.852619	1.94884
17SGM55C_2	1460	2.59		3.3557	0.135129	0.1014	0.0028	n.d.	1667	20	1681	30	1649	26		1685	30		0.832838	1.90363
17SGM55C_11	400	1.19		3.33333	0.122222	0.1016	0.0023	n.d.	1674	18	1691	27	1653	21		1695	27		1.00532	2.24719
17SGM55C_23	554	3.76		3.34448	0.190154	0.0977	0.0026	n.d.	1639	26	1686	42	1580	25		1697	42		2.78766	6.28707
17SGM55C_12	259	3.28		3.19489	0.122488	0.1024	0.0026	n.d.	1716	19	1755	29	1667	23		1765	30		2.22222	5.01425
17SGM55C_6	568	1.6		3.18471	0.152136	0.1033	0.0026	n.d.	1725	22	1760	37	1683	23		1769	37		1.98864	4.375
								n.d.
12EC_2A_25	610	3.67		83.8926	4.01164	0.0496	0.0023	n.d.	79.5	2.5	76.4	1.8	175	54		76.2	1.8		-4.05759	-129.058
12EC_2A_30	1241	5.9		81.9001	4.42703	0.0499	0.0013	n.d.	81.9	2.4	78.2	2.1	189	30		78	2.1		-4.73146	-141.688
12EC_2A_26	1029	5.1		78.8644	5.22445	0.0466	0.0019	n.d.	79.5	3	81.2	2.7	28	49		81.3	2.7		2.0936	65.5172
12EC_2A_18	1720	20		77.3994	3.17505	0.0501	0.0017	n.d.	86.8	2.2	82.8	1.7	199	39		82.5	1.7		-4.83092	-140.338
12EC_2A_17	1650	13.1		77.3395	3.17014	0.0471	0.0018	n.d.	81.8	2.2	82.8	1.7	53	46		82.9	1.7		1.20773	35.9903
12EC_2A_29	593	3.86		75.188	3.90073	0.0477	0.002	n.d.	85.1	2.7	85.2	2.2	83	50		85.2	2.2		0.117371	2.58216
12EC_2A_8	576	3.13		74.0192	4.71181	0.0595	0.0032	n.d.	106.7	4.2	86.5	2.7	584	58		85.2	2.7		-23.3526	-575.145
12EC_2A_13	1104	3.26		73.9645	3.17303	0.0521	0.002	n.d.	94.1	2.6	86.6	1.8	289	44		86.1	1.8		-8.66051	-233.718
12EC_2A_14	1430	4.13		73.3676	3.82179	0.0491	0.0019	n.d.	89.6	2.8	87.3	2.3	152	45		87.1	2.3		-2.63459	-74.1123
12EC_2A_27	1580	4.21		73.3138	3.33244	0.049	0.0026	n.d.	89.5	3	87.3	2	147	62		87.2	2		-2.52005	-68.3849
12EC_2A_9	1420	5.43		71.5308	3.42816	0.0669	0.007	n.d.	123.1	6.7	89.5	2.1	834	109		87.4	2.1		-37.5419	-831.844
12EC_2A_11	1848	19.5		71.0227	3.73273	0.0486	0.0013	n.d.	91.5	2.6	90.1	2.4	128	31		90	2.3		-1.55383	-42.0644
12EC_2A_7	200	1.89		67.8887	3.91754	0.0802	0.0051	n.d.	153.2	6.1	94.3	2.7	1201	63		90.4	2.6		-62.4602	-1173.59
12EC_2A_1	514	3.09		68.9655	3.32937	0.0517	0.0023	n.d.	99.8	3.1	92.8	2.2	271	51		92.4	2.2		-7.5431	-192.026
12EC_2A_5	1116	3		67.7507	4.36065	0.0591	0.0055	n.d.	115.3	6.2	94.5	3	570	101		93.1	3		-22.0106	-503.175
12EC_2A_10	1550	4.42		67.0691	3.05882	0.057	0.0039	n.d.	112.5	4.4	95.4	2.2	491	75		94.3	2.1		-17.9245	-414.675
12EC_2A_24	1300	1.9		67.4764	3.18714	0.0489	0.0018	n.d.	96.7	2.8	94.8	2.2	142	43		94.7	2.2		-2.00422	-49.789
12EC_2A_23	782	2.85		67.2043	3.11633	0.0502	0.0027	n.d.	99.5	3.4	95.2	2.2	203	62		94.9	2.2		-4.51681	-113.235
12EC_2A_12	1470	5.7		67.3854	4.17753	0.0468	0.0017	n.d.	92.8	3.2	95	2.9	38	43		95.1	2.9		2.31579	60
12EC_2A_6	1350	1.92		64.6412	3.17565	0.0521	0.0026	n.d.	107	3.6	99	2.4	289	57		98.5	2.4		-8.08081	-191.919
12EC_2A_15	1392	4.9		64.8929	2.14766	0.047	0.0013	n.d.	96.6	2	98.6	1.6	48	33		98.7	1.6		2.0284	51.3185
12EC_2A_2	620	2.61		63.6132	3.03498	0.0553	0.0031	n.d.	114.9	4	100.5	2.4	423	63		99.6	2.4		-14.3284	-320.896
12EC_2A_28	1740	2.3		63.6132	2.22565	0.0478	0.0018	n.d.	100.1	2.4	100.5	1.7	88	45		100.6	1.7		0.39801	12.4378
12EC_2A_3	1480	2.59		62.2665	1.89979	0.0549	0.0025	n.d.	116.4	3	102.7	1.6	407	51		101.8	1.5		-13.3398	-296.3
12EC_2A_21	1240	2.67		60.6796	2.72469	0.0585	0.0036	n.d.	126.7	4.5	105.4	2.3	548	67		104	2.3		-20.2087	-419.924
12EC_2A_16	780	1.83		57.9039	2.347	0.0475	0.0015	n.d.	108.8	2.6	110.4	2.2	73	38		110.5	2.2		1.44928	33.8768
12EC_2A_4	778	1.57		57.3066	2.5944	0.051	0.0024	n.d.	117.5	3.6	111.5	2.5	240	54		111.1	2.5		-5.38117	-115.247
12EC_2A_20	627	2.76		54.6448	3.58327	0.0753	0.0085	n.d.	177	11	116.9	3.8	1076	113		113	3.7		-51.4115	-820.445
12EC_2A_19	640	2.69		55.2181	2.83561	0.0512	0.0025	n.d.	122.1	4.1	115.7	2.9	249	56		115.3	2.9		-5.53155	-115.212
12EC_2A_22	685	2.95		55.0964	2.82312	0.051	0.0022	n.d.	121.9	3.8	116	2.9	240	50		115.6	2.9		-5.08621	-106.897
								n.d.
12EC_6_24	820	3.4		89.7666	5.07657	0.0492	0.0022	n.d.	73.9	2.6	71.4	2	156	52		71.3	2		-3.5014	-118.487
12EC_6_31	165.2	3.48		81.3008	4.95737	0.117	0.027	n.d.	184	20	78.8	2.4	1910	207		71.9	2.2		-133.503	-2323.86
12EC_6_30	273	2.26		81.367	4.5682	0.0495	0.0024	n.d.	81.8	2.9	78.7	2.2	171	57		78.6	2.2		-3.93901	-117.281
12EC_6_27	192	3.93		79.4281	3.59603	0.0555	0.003	n.d.	93.4	3.1	80.7	1.8	431	60		79.9	1.8		-15.7373	-434.077
12EC_6_29	169	3.09		77.4593	4.37996	0.0526	0.0027	n.d.	90.8	3.3	82.7	2.3	311	58		82.2	2.3		-9.79444	-276.058
12EC_6_5	142	2.37		73.6377	3.30773	0.0488	0.0023	n.d.	88.7	2.8	87	1.9	137	55		86.8	1.9		-1.95402	-57.4713
12EC_6_19	203	4.59		72.7802	3.76084	0.0513	0.0032	n.d.	94.1	3.6	88	2.3	253	72		87.6	2.2		-6.93182	-187.5
12EC_6_2	164	1.83		72.2543	3.34124	0.0521	0.0023	n.d.	96.2	2.9	88.6	2	289	50		88.1	2		-8.57788	-226.185
12EC_6_11	129	2.77		71.2758	2.23531	0.0567	0.0028	n.d.	105.6	2.9	89.8	1.4	479	55		88.8	1.4		-17.5947	-433.408
12EC_6_23	281	4.42		71.7875	3.19514	0.0474	0.0021	n.d.	88.4	2.7	89.2	2	68	53		89.2	2		0.896861	23.7668
12EC_6_15	222	5.43		71.3267	3.61212	0.0495	0.0022	n.d.	92.7	3	89.8	2.3	171	52		89.6	2.3		-3.2294	-90.4232
12EC_6_8	107	1.67		71.1744	3.44474	0.0489	0.0032	n.d.	91.9	3.6	89.9	2.2	142	77		89.8	2.2		-2.22469	-57.9533
12EC_6_14	210	1.79		71.2251	3.50038	0.046	0.0026	n.d.	86.6	3.1	89.9	2.2	0.0002	70.3497		90.1	2.2		3.67075	99.9998
12EC_6_25	233	6.03		70.8717	3.91778	0.0478	0.0029	n.d.	90.3	3.5	90.3	2.5	88	72		90.3	2.5		0	2.54707
12EC_6_28	406	1.9		70.8717	3.81733	0.0463	0.0024	n.d.	87.5	3.1	90.3	2.4	12	62		90.5	2.4		3.10078	86.711
12EC_6_17	313	4.34		70.373	4.4076	0.0516	0.0027	n.d.	97.7	3.8	91	2.8	267	60		90.5	2.8		-7.36264	-193.407
12EC_6_9	37.2	2.54		56.1798	3.47178	0.214	0.026	n.d.	428	24	113.7	3.5	2935	98		90.1	2.8		-276.429	-2481.35
12EC_6_7	127	3.12		69.979	2.54647	0.0497	0.0026	n.d.	94.8	2.9	91.5	1.7	180	61		91.3	1.6		-3.60656	-96.7213
12EC_6_13	93	2.46		69.541	3.24009	0.0502	0.003	n.d.	96.3	3.5	92	2.1	203	69		91.8	2.1		-4.67391	-120.652
12EC_6_20	229	1.88		69.7837	3.65232	0.0464	0.0025	n.d.	89	3.2	91.7	2.4	17	65		91.9	2.4		2.94438	81.4613
12EC_6_4	52.3	3.48		68.918	2.9923	0.0522	0.0038	n.d.	100.8	4.1	92.9	2	293	83		92.4	2		-8.50377	-215.393
12EC_6_3	35	3.09		69.3001	2.64137	0.047	0.0044	n.d.	90.7	4.4	92.4	1.7	48	112		92.5	1.7		1.83983	48.0519
12EC_6_1	126.6	2.8		69.2042	3.6398	0.0479	0.0024	n.d.	92.5	3.2	92.5	2.4	93	59		92.5	2.4		0	-0.540541
12EC_6_26	132	1.843		68.9655	2.99643	0.0494	0.0023	n.d.	95.6	2.9	92.8	2	166	54		92.6	2		-3.01724	-78.8793
12EC_6_16	970	4.76		68.5871	3.4811	0.0494	0.0022	n.d.	96.1	3.1	93.3	2.4	166	52		93.1	2.3		-3.00107	-77.9207
12EC_6_21	87	1.715		66.0066	2.61412	0.0672	0.0044	n.d.	133.3	4.8	96.9	1.9	843	68		94.6	1.9		-37.5645	-769.969
12EC_6_18	109.5	1.66		66.0066	2.61412	0.0572	0.0045	n.d.	114.6	4.8	96.9	1.9	498	87		95.8	1.9		-18.2663	-413.932
12EC_6_12	199	1.6		64.4745	3.11772	0.0486	0.0029	n.d.	100.4	3.7	99.2	2.4	128	70		99.1	2.4		-1.20968	-29.0323
12EC_6_22	102.2	2.033		63.8978	2.85805	0.0487	0.0021	n.d.	101.4	3	100.1	2.2	132	51		100	2.2		-1.2987	-31.8681
12EC_6_10	96.4	1.617		62.3441	2.72075	0.0505	0.0025	n.d.	107.5	3.4	102.6	2.2	217	57		102.3	2.2		-4.77583	-111.501
12EC_6_6	342	3.22		57.1429	5.22449	0.0489	0.0018	n.d.	113.2	5.3	111.8	5.1	142	43		111.7	5.1		-1.25224	-27.0125
								n.d.
12EC_7_13	693	6.46		80.6452	4.2924	0.05	0.0024	n.d.	83.3	2.9	79.4	2.1	194	56		79.2	2.1		-4.91184	-144.332
12EC_7_16	1502	4.6		78.2473	4.77565	0.0478	0.0023	n.d.	82.1	3.1	81.9	2.5	88	57		81.8	2.5		-0.2442	-7.44811
12EC_7_1	1330	33.7		77.0416	3.73931	0.0473	0.002	n.d.	82.5	2.5	83.1	2	63	50		83.2	2		0.722022	24.1877
12EC_7_23	804	6.64		76.5697	3.92815	0.0499	0.0026	n.d.	87.3	3.1	83.6	2.1	189	61		83.4	2.1		-4.42584	-126.077
12EC_7_15	470	2.11		71.2251	3.34819	0.0478	0.0022	n.d.	89.8	2.8	89.9	2.1	88	55		89.9	2.1		0.111235	2.11346
12EC_7_14	1190	22.8		67.7048	3.80467	0.0521	0.0029	n.d.	102.3	3.9	94.5	2.6	289	64		94	2.6		-8.25397	-205.82
12EC_7_26	671	6.61		67.8426	3.8662	0.0502	0.002	n.d.	98.6	3.3	94.3	2.7	203	46		94.1	2.7		-4.55992	-115.27
12EC_7_25	37	1.539		66.8896	3.1767	0.0602	0.0044	n.d.	118.7	4.9	95.7	2.3	610	79		94.2	2.2		-24.0334	-537.409
12EC_7_27	1189	6.07		65.703	3.1945	0.0486	0.0021	n.d.	98.6	3.1	97.4	2.3	128	51		97.3	2.3		-1.23203	-31.4168
12EC_7_4	820	4.22		64.6831	3.26344	0.0478	0.0021	n.d.	98.5	3.1	98.9	2.5	88	52		98.9	2.5		0.404449	11.0212
12EC_7_7	359	3.11		61.0128	2.60579	0.0502	0.002	n.d.	109.1	3	104.8	2.2	203	46		104.5	2.2		-4.10305	-93.7023
12EC_7_29	986	13.8		60.6061	3.67309	0.0504	0.0021	n.d.	110.2	3.8	105.5	3.2	212	48		105.2	3.2		-4.45498	-100.948
12EC_7_18	307	1.327		59.952	2.65974	0.0591	0.0066	n.d.	129.3	7.3	106.6	2.3	570	122		105.2	2.3		-21.2946	-434.709
12EC_7_3	3470	33.2		60.241	4.35477	0.0468	0.0021	n.d.	103.3	4.2	106.1	3.8	38	54		106.3	3.8		2.63902	64.1847
12EC_7_21	329	5.79		59.6659	3.23961	0.049	0.0026	n.d.	108.9	3.9	107.1	2.9	147	62		107	2.9		-1.68067	-37.2549
12EC_7_17	252	1.966		58.9971	2.78452	0.0473	0.0022	n.d.	106.4	3.3	108.4	2.5	63	55		108.5	2.5		1.84502	41.8819
12EC_7_28	501	1.116		51.2821	2.89283	0.0507	0.0025	n.d.	129.7	4.6	124.5	3.5	226	57		124.2	3.5		-4.17671	-81.5261
12EC_7_30	540	16.93		46.2963	2.35768	0.0497	0.0021	n.d.	140.1	4.3	137.8	3.5	180	49		137.6	3.5		-1.66909	-30.6241
12EC_7_20	8400	89.7		43.4783	2.45747	0.0497	0.0023	n.d.	148.5	5	146.6	4.1	180	54		146.5	4.1		-1.29604	-22.7831
12EC_7_19	11880	68.7		42.3729	2.87274	0.0479	0.0023	n.d.	147	5.7	150.4	5	93	57		150.6	5		2.26064	38.1649
12EC_7_24	2157	5.06		40.6504	2.31344	0.0526	0.0023	n.d.	166.6	5.5	156.7	4.4	311	50		156	4.4		-6.3178	-98.4684
12EC_7_6	511	1.378		37.7358	1.70879	0.0521	0.0018	n.d.	176.9	4.6	168.6	3.8	289	39		168.1	3.8		-4.92289	-71.4116
12EC_7_5	648	2.77		37.594	1.69597	0.0502	0.0018	n.d.	171.5	4.5	169.2	3.8	203	42		169.1	3.8		-1.35934	-19.9764
12EC_7_8	749	5.62		22.2717	1.58729	0.0885	0.0035	n.d.	443	15	283.1	9.9	1392	38		270.4	9.4		-56.4818	-391.699
12EC_7_11	633	8.19		14.6199	0.555727	0.0716	0.0029	n.d.	524	11	426.5	7.8	974	41		418.1	7.7		-22.8605	-128.37
12EC_7_9	1609	5.8		11.1857	0.800765	0.0951	0.0042	n.d.	787	23	552	19	1529	42		528	18		-42.5725	-176.993
12EC_7_2	61.1	3.16		5.6338	0.298354	0.0791	0.0045	n.d.	1093	26	1053	26	1174	56		1048	26		-3.79867	-11.491
12EC_7_10	409	2.46		5.4615	0.220727	0.1007	0.0043	n.d.	1284	21	1084	20	1636	40		1053	20		-18.4502	-50.9225
12EC_7_22	2260	4		5.40541	0.245435	0.0787	0.0034	n.d.	1118	21	1094	23	1164	43		1091	23		-2.19378	-6.39854
12EC_7_12	212	2.054		4.34783	0.189036	0.0911	0.0038	n.d.	1379	23	1335	26	1448	40		1327	26		-3.29588	-8.46442
								n.d.
12EC_8_28	1030	3.47		80.3859	5.68646	0.106	0.014	n.d.	170	12	79.7	2.8	1731	121		73.9	2.6		-113.3	-2071.89
12EC_8_15	673	4.98		85.4701	4.01782	0.0515	0.0034	n.d.	81	3.2	75	1.8	262	76		74.6	1.7		-8	-249.333
12EC_8_18	437	3.15		81.0373	3.5462	0.047	0.0021	n.d.	78.1	2.4	79.1	1.7	48	53		79.1	1.7		1.26422	39.3173
12EC_8_13	143	5.33		72.7802	3.28411	0.11	0.012	n.d.	192	10	88	2	1799	99		81.1	1.8		-118.182	-1944.32
12EC_8_16	1249	11.85		78.4314	3.81392	0.0508	0.0024	n.d.	86.8	2.8	81.7	2	231	55		81.4	2		-6.24235	-182.742
12EC_8_25	2500	19.1		73.1529	3.47837	0.105	0.011	n.d.	183.3	9.6	87.5	2.1	1713	96		81.2	1.9		-109.486	-1857.71
12EC_8_22	1473	16.3		78.5546	3.7642	0.047	0.0021	n.d.	80.5	2.5	81.5	1.9	48	53		81.6	1.9		1.22699	41.1043
12EC_8_10	124.5	1.95		76.4526	3.09785	0.0505	0.0034	n.d.	88.5	3.3	83.8	1.7	217	78		83.5	1.7		-5.60859	-158.95
12EC_8_26	653	18.2		75.8725	3.39642	0.0519	0.003	n.d.	91.5	3.2	84.4	1.9	280	66		84	1.9		-8.41232	-231.754
12EC_8_27	986	3.69		71.4286	26.0204	0.095	0.011	n.d.	171	30	90	16	1527	109		84	15		-90	-1596.67
12EC_8_20	1800	27.3		74.7943	4.36347	0.0566	0.0027	n.d.	100.7	3.6	85.6	2.5	475	53		84.7	2.5		-17.6402	-454.907
12EC_8_17	211	3.66		75.5287	3.93616	0.0483	0.0019	n.d.	85.8	2.7	84.8	2.2	113	46		84.7	2.2		-1.17925	-33.2547
12EC_8_21	703	3.78		75.4717	3.41759	0.0481	0.0017	n.d.	85.5	2.4	84.9	1.9	103	42		84.8	1.9		-0.706714	-21.3192
12EC_8_24	7190	27.5		72.5163	3.94396	0.0568	0.0033	n.d.	104.1	3.9	88.3	2.4	483	64		87.3	2.4		-17.8935	-446.999
12EC_8_11	120.6	2.1		71.5308	3.01882	0.0652	0.008	n.d.	120.2	7.4	89.5	1.9	780	129		87.5	1.8		-34.3017	-771.508
12EC_8_29	719	13.87		63.0517	2.82262	0.1582	0.0084	n.d.	301.6	9.1	101.4	2.3	2436	45		87.4	1.9		-197.436	-2302.37
12EC_8_19	1222	17.43		71.0732	3.63701	0.0491	0.002	n.d.	92.3	2.9	90.1	2.3	152	48		89.9	2.3		-2.44173	-68.7014
12EC_8_5	91.4	1.97		66.8449	2.2788	0.0844	0.0059	n.d.	162.9	5.9	95.7	1.6	1301	68		91.3	1.5		-70.2194	-1259.46
12EC_8_6	90.8	2.06		69.6864	2.67091	0.0488	0.0027	n.d.	93.6	3	91.8	1.7	137	65		91.7	1.7		-1.96078	-49.2375
12EC_8_14	459	11.3		67.6133	4.48012	0.0505	0.0027	n.d.	99.5	4	94.6	3.1	217	62		94.3	3.1		-5.1797	-129.387
12EC_8_12	100.2	2.38		50.2513	6.31297	0.25	0.042	n.d.	530	43	127	7.9	3184	133		94.9	5.9		-317.323	-2407.09
12EC_8_23	7840	26.2		62.5	5.85937	0.0512	0.0024	n.d.	108.6	5.4	102.3	4.8	249	54		101.9	4.7		-6.15836	-143.402
12EC_8_9	133.6	1.804		39.0625	6.2561	0.328	0.072	n.d.	781	74	163	13	3607	168		106	8.4		-379.141	-2112.88
12EC_8_7	1017	32.5		54.3478	3.54442	0.049	0.002	n.d.	118.9	4.3	117.5	3.8	147	48		117.4	3.8		-1.19149	-25.1064
12EC_8_8	232	7.29		51.2821	2.10388	0.0531	0.0025	n.d.	135.4	4	124.5	2.5	332	53		123.8	2.5		-8.75502	-166.667
12EC_8_3	2290	49.9		48.6145	2.1034	0.049	0.0021	n.d.	132.1	3.8	131.3	2.8	147	50		131.2	2.8		-0.609292	-11.9573
12EC_8_30	67	2.99		44.6429	2.19228	0.0644	0.0063	n.d.	184.1	9.2	142.8	3.5	754	103		140	3.4		-28.9216	-428.011
12EC_8_4	14.32	5.23		43.29	2.43624	0.0833	0.0093	n.d.	239	13	147.2	4.1	1275	109		140.9	3.9		-62.3641	-766.168
12EC_8_1	597	37.1		42.735	2.19154	0.0497	0.002	n.d.	150.9	4.6	149.1	3.8	180	47		149	3.8		-1.20724	-20.7243
12EC_8_2	74	3.78		35.5872	1.89967	0.0507	0.0025	n.d.	182	6.1	178.6	4.7	226	57		178.4	4.7		-1.9037	-26.5398
								n.d.
12EC_17_3	819	4.37		110.619	7.46437	0.0552	0.003	n.d.	67.5	2.8	58	1.9	419	61		57.4	1.9		-16.3793	-622.414
12EC_17_2	775	4.34		108.46	5.99941	0.0539	0.0029	n.d.	67.3	2.5	59.2	1.6	366	61		58.7	1.6		-13.6824	-518.243
12EC_17_8	1244	50.3		93.8086	4.57603	0.0496	0.0027	n.d.	71.4	2.5	68.4	1.7	175	63		68.2	1.7		-4.38596	-155.848
12EC_17_4	790	31.8		92.5926	3.08642	0.048	0.0022	n.d.	70.1	1.9	69.2	1.1	98	54		69.2	1.1		-1.30058	-41.6185
12EC_17_6	1380	5.35		87.0322	3.56006	0.0487	0.0021	n.d.	75.4	2.2	73.6	1.5	132	51		73.5	1.5		-2.44565	-79.3478
12EC_17_7	1619	7.43		85.8369	6.11542	0.047	0.0026	n.d.	73.9	3.2	74.7	2.6	48	66		74.7	2.6		1.07095	35.743
12EC_17_5	1414	44.7		81.5661	3.39304	0.0503	0.002	n.d.	82.8	2.3	78.6	1.6	208	46		78.3	1.6		-5.34351	-164.631
12EC_17_1	2600	26.9		49.7512	3.46526	0.0542	0.0022	n.d.	142	5.3	128.3	4.4	378	46		127.4	4.4		-10.6781	-194.622
12EC_17_9	1910	27		46.0829	9.13164	0.063	0.0054	n.d.	175	17	138	14	707	91		136	13		-26.8116	-412.319
								n.d.
12SGM19_15	272	1.021		98.2318	7.71959	0.06	0.0095	n.d.	82.1	7	65.3	2.6	603	171		64.3	2.5		-25.7274	-823.43
12SGM19_11	3800	2.634		80.9061	5.76031	0.0492	0.0032	n.d.	81.7	3.8	79.2	2.8	156	76		79	2.8		-3.15657	-96.9697
12SGM19_12	1090	2.113		79.4281	5.48868	0.0511	0.005	n.d.	86.3	5	80.7	2.8	244	113		80.3	2.8		-6.93928	-202.354
12SGM19_1	2000	1.444		78.0031	5.84111	0.0483	0.0032	n.d.	83.2	4	82.1	3.1	113	78		82.1	3.1		-1.33983	-37.637
12SGM19_7	1930	2.033		74.239	5.12564	0.046	0.0032	n.d.	83.2	3.9	86.3	3	0.0002	86.5843		86.4	3		3.59212	99.9998
12SGM19_4	2770	7.41		74.0192	4.98575	0.0476	0.0026	n.d.	86.2	3.6	86.5	2.9	78	65		86.5	2.9		0.346821	9.82659
12SGM19_17	3800	1.506		73.9098	5.46266	0.0474	0.0025	n.d.	86	3.7	86.6	3.2	68	63		86.7	3.2		0.692841	21.4781
12SGM19_13	3540	2.301		73.3138	4.94492	0.0472	0.0028	n.d.	86.3	3.7	87.3	2.9	58	71		87.4	2.9		1.14548	33.5624
12SGM19_9	405	0.825		71.5308	5.11665	0.0451	0.007	n.d.	84.6	6.9	89.5	3.2	0.0002	179.07		89.8	3.2		5.47486	99.9998
12SGM19_6	504	0.308		66.6223	4.88238	0.0569	0.0056	n.d.	113	6.6	96	3.5	487	109		95	3.5		-17.7083	-407.292
12SGM19_8	1770	3.89		23.4742	1.70821	0.0776	0.0036	n.d.	381	14	268.9	9.6	1136	46		260.3	9.3		-41.6884	-322.462
12SGM19_5	1690	3.48		20.4918	2.01559	0.0807	0.0037	n.d.	440	19	307	15	1213	45		297	14		-43.3225	-295.114
12SGM19_18	610	0.668		6.09756	0.594884	0.0875	0.0036	n.d.	1108	36	979	44	1371	40		961	44		-13.1767	-40.0409
12SGM19_16	2410	4.68		4.24989	0.288986	0.1381	0.0052	n.d.	1727	32	1362	42	2203	33		1283	40		-26.7988	-61.7474
12SGM19_2	2970	5.76		4.40529	0.310505	0.0902	0.0034	n.d.	1361	30	1319	42	1429	36		1311	42		-3.18423	-8.33965
12SGM19_14	4270	3.956		3.86399	0.268747	0.1136	0.0042	n.d.	1645	32	1484	46	1857	33		1449	45		-10.8491	-25.1348
12SGM19_10	1980	7.28		3.55999	0.240796	0.106	0.004	n.d.	1655	32	1596	48	1731	35		1583	47		-3.69674	-8.45865
12SGM19_3	770	1.93		3.52113	0.260365	0.1026	0.0041	n.d.	1637	34	1611	53	1671	37		1606	53		-1.6139	-3.72439
13SGM38_23	2020	1.771		88.6525	6.99474	0.0475	0.0031	n.d.	72.3	3.6	72.3	2.8	73	78		72.3	2.8		0	-0.968188
13SGM38_25	1382	1.521		87.9507	6.03356	0.0492	0.0048	n.d.	75.4	4.3	72.9	2.5	156	114		72.7	2.5		-3.42936	-113.992
13SGM38_22	1104	1.727		85.2515	6.46836	0.0511	0.0043	n.d.	80.6	4.4	75.2	2.8	244	97		74.8	2.8		-7.18085	-224.468
13SGM38_9	979	1.625		84.8896	6.05325	0.0493	0.0045	n.d.	78.2	4.4	75.5	2.7	161	107		75.3	2.7		-3.57616	-113.245
13SGM38_18	1450	1.913		84.6024	6.58496	0.0499	0.0039	n.d.	79.4	4.2	75.7	2.9	189	91		75.5	2.9		-4.88771	-149.67
13SGM38_21	1270	1.737		84.0336	6.92042	0.0489	0.0045	n.d.	78.3	4.7	76.3	3.1	142	108		76.1	3.1		-2.62123	-86.1075
13SGM38_13	598	3.395		83.9631	6.55631	0.0493	0.0051	n.d.	79	4.9	76.3	3	161	121		76.2	3		-3.53866	-111.009
13SGM38_11	1600	2.043		83.3333	5.90278	0.0512	0.0038	n.d.	82.5	4.1	76.9	2.7	249	85		76.5	2.7		-7.28218	-223.797
13SGM38_26	860	1.969		83.4028	6.26043	0.0477	0.0051	n.d.	77	4.8	76.8	2.9	83	127		76.8	2.9		-0.260417	-8.07292
13SGM38_4	1510	1.929		83.0565	6.34651	0.05	0.0035	n.d.	80.9	4	77.2	2.9	194	81		76.9	2.9		-4.79275	-151.295
13SGM38_15	221	6.39		82.9876	6.68033	0.0498	0.0093	n.d.	80.7	7.9	77.2	3.1	185	217		77	3.1		-4.53368	-139.637
13SGM38_2	1750	2.272		82.3723	5.83527	0.0516	0.0035	n.d.	84.1	4	77.8	2.7	267	78		77.4	2.7		-8.09769	-243.188
13SGM38_19	1380	1.153		82.3045	5.82567	0.047	0.0033	n.d.	76.9	3.7	77.9	2.7	48	84		77.9	2.7		1.2837	38.3825
13SGM38_1	632	1.934		82.1018	5.79701	0.0482	0.0054	n.d.	79	5	78	2.7	108	132		78	2.7		-1.28205	-38.4615
13SGM38_10	1130	1.6		80.6452	5.5281	0.0616	0.0058	n.d.	101.6	5.6	79.4	2.7	659	101		78	2.7		-27.9597	-729.975
13SGM38_20	1730	1.877		81.0373	6.56704	0.0467	0.0029	n.d.	77.6	3.8	79.1	3.2	33	74		79.2	3.2		1.89633	58.2807
13SGM38_17	1550	1.714		80.5802	6.23344	0.0502	0.0033	n.d.	83.6	4.1	79.5	3.1	203	76		79.3	3		-5.15723	-155.346
13SGM38_14	305	2.824		79.8085	6.36939	0.0518	0.0086	n.d.	87	7.7	80.3	3.2	276	190		79.9	3.2		-8.34371	-243.711
13SGM38_24	853	2.061		79.8722	6.18818	0.0494	0.0049	n.d.	83.1	5	80.2	3.1	166	116		80	3.1		-3.61596	-106.983
13SGM38_12	1598	1.891		79.6178	5.51493	0.0473	0.0033	n.d.	79.9	3.8	80.5	2.8	63	83		80.5	2.8		0.745342	21.7391
13SGM38_7	355	1.541		79.1766	6.20624	0.0454	0.0071	n.d.	77.2	6.5	80.9	3.2	0.0002	174.578		81.1	3.2		4.57355	99.9998
13SGM38_3	1486	4		77.5795	6.01858	0.0556	0.004	n.d.	95.6	4.8	82.6	3.2	435	80		81.7	3.2		-15.7385	-426.634
13SGM38_6	1960	1.778		77.7001	6.0373	0.0512	0.0029	n.d.	88.3	4.1	82.4	3.2	249	65		82.1	3.2		-7.16019	-202.184
13SGM38_16	873	3.58		77.2201	5.96294	0.049	0.0046	n.d.	85.1	5	82.9	3.2	147	110		82.8	3.2		-2.6538	-77.3221
13SGM38_5	1960	1.915		72.4638	7.3514	0.0486	0.0028	n.d.	89.8	5	88.4	4.5	128	68		88.3	4.4		-1.58371	-44.7964
13SGM38_8	412	2.907		7.57002	0.561591	0.0833	0.0039	n.d.	937	27	800	28	1275	46		783	27		-17.125	-59.375
San Gabriel terrane
13SGM43_24	326	2.333		88.4173	7.81762	0.075	0.011	n.d.	112.3	9.1	72.5	3.2	1068	147		70	3.1		-54.8966	-1373.1
13SGM43_21	440	1.273		86.4304	7.39552	0.0365	0.0079	n.d.	57.4	6.5	74.2	3.2	0.0002	196.272		75.2	3.2		22.6415	99.9997
13SGM43_1	3550	1.724		85.034	7.08617	0.0485	0.0027	n.d.	76.8	3.7	75.4	3.1	123	66		75.3	3.1		-1.85676	-63.13
13SGM43_2	1170	1.774		83.7521	6.45326	0.0603	0.0069	n.d.	96.1	6.3	76.5	2.9	613	124		75.3	2.9		-25.6209	-701.307
13SGM43_22	219	1.14		83.9631	7.75477	0.046	0.011	n.d.	73.9	9.1	76.3	3.5	0.0002	297.634		76.5	3.5		3.14548	99.9997
13SGM43_27	670	3.9		81.6327	6.66389	0.0446	0.0054	n.d.	73.7	5.2	78.5	3.2	0.0002	142.362		78.8	3.2		6.11465	99.9997
13SGM43_29	1390	1.374		81.2348	6.13715	0.0479	0.0033	n.d.	79.3	3.9	78.9	3	93	82		78.8	3		-0.506971	-17.8707
13SGM43_8	1070	3.395		80.2568	5.5394	0.0459	0.0034	n.d.	77	3.8	79.8	2.7	0.0002	84.6698		80	2.7		3.50877	99.9997
13SGM43_23	178	1.243		80.2568	6.44116	0.042	0.013	n.d.	71	11	79.8	3.2	0.0001	339.032		80.4	3.2		11.0276	99.9999
13SGM43_28	1160	2.324		78.6164	6.18053	0.0476	0.004	n.d.	81.4	4.5	81.5	3.2	78	100		81.5	3.2		0.122699	4.29448
13SGM43_19	1760	2.437		78.125	6.10352	0.0464	0.0031	n.d.	79.9	3.9	82	3.2	17	80		82.1	3.2		2.56098	79.2683
13SGM43_12	570	2.88		77.7605	5.80483	0.0434	0.0052	n.d.	75.2	5.1	82.4	3.1	0.0002	141.035		82.8	3.1		8.73786	99.9998
13SGM43_30	377	0.913		77.821	5.51106	0.042	0.0065	n.d.	72.8	6	82.3	2.9	0.0001	169.516		82.9	2.9		11.5431	99.9999
13SGM43_11	1340	2.364		75.5858	5.71321	0.0462	0.004	n.d.	82.1	4.5	84.7	3.2	7	104.2		84.9	3.2		3.06966	91.7355
13SGM43_13	910	1.668		74.7384	6.14441	0.0501	0.0046	n.d.	89.7	5.3	85.7	3.5	199	107		85.4	3.5		-4.66744	-132.205
13SGM43_20	450	2.745		70.9723	5.54078	0.0456	0.0098	n.d.	86.2	9.4	90.2	3.5	0.0002	250.268		90.4	3.5		4.43459	99.9998
13SGM43_14	315	1.318		44.2478	3.91573	0.0534	0.0058	n.d.	156	10	144.1	6.3	345	123		143.3	6.3		-8.25815	-139.417
13SGM43_10	258	1.191		38.61	3.27962	0.0458	0.0055	n.d.	154	10	164.8	6.9	0.0002	136.1		165.6	6.9		6.5534	99.9999
13SGM43_5	1147	2.227		24.6914	3.04832	0.083	0.004	n.d.	387	21	256	15	1268	47		246	15		-51.1719	-395.312
13SGM43_17	1990	3.71		10.2041	1.24948	0.0977	0.0044	n.d.	854	38	603	35	1580	42		576	34		-41.6252	-162.023
13SGM43_25	254	3.51		8.31947	0.636765	0.0822	0.0041	n.d.	873	27	732	26	1249	49		716	26		-19.2623	-70.6284
13SGM43_7	710	2.32		7.64526	0.75985	0.0981	0.0045	n.d.	1034	35	792	37	1587	43		762	36		-30.5556	-100.379
13SGM43_15	373	16.28		3.98406	0.349201	0.098	0.004	n.d.	1502	38	1444	57	1586	38		1432	56		-4.01662	-9.8338
13SGM43_9	720	1.791		3.90168	0.274016	0.0995	0.0041	n.d.	1531	32	1471	46	1614	38		1459	46		-4.07886	-9.72128
13SGM43_4	1810	28.7		3.89105	0.272525	0.099	0.0037	n.d.	1529	31	1474	46	1605	35		1463	46		-3.73134	-8.88738
13SGM43_16	1200	25.7		3.61664	0.261601	0.0989	0.0041	n.d.	1586	33	1574	51	1603	39		1571	50		-0.762389	-1.84244
13SGM43_3	658	1.381		3.55872	0.265954	0.1034	0.0041	n.d.	1635	34	1596	53	1685	37		1588	53		-2.44361	-5.57644
13SGM43_6	417	1.357		3.4153	0.233286	0.1073	0.0042	n.d.	1699	32	1656	50	1753	36		1645	50		-2.59662	-5.85749
13SGM43_26	226	1.898		3.24675	0.231911	0.1048	0.0045	n.d.	1721	35	1731	54	1710	40		1733	54		0.577701	1.21317
13SGM43_18	296	1.932		3.15259	0.218653	0.1046	0.0043	n.d.	1744	34	1776	54	1706	38		1784	54		1.8018	3.94144
13SGM44_30	399	8.1		34.1297	2.44616	0.0445	0.0042	n.d.	167.8	9.2	186.2	6.6	0.0001	103.381		187.4	6.6		9.88185	99.9999
13SGM44_29	266	13.3		33.7838	2.73923	0.0485	0.0059	n.d.	183	12	188	7.5	123	143		188.4	7.5		2.65957	34.5745
13SGM44_4	108	2.47		31.4465	2.5711	0.0519	0.0089	n.d.	208	18	201.8	8.1	280	196		201.4	8.1		-3.07235	-38.7512
13SGM44_3	41.1	11.8		31.6456	2.80404	0.044	0.018	n.d.	178	34	200.6	8.7	0.0002	470.879		202.1	8.8		11.2662	99.9999
13SGM44_26	232	11.9		29.7619	2.83447	0.0411	0.0061	n.d.	177	14	213	10	0.0001	149.861		215	10		16.9014	100
13SGM44_27	37.8	16		29.2398	3.41986	0.04	0.011	n.d.	175	24	217	12	0.0001	284.736		220	13		19.3548	100
13SGM44_18	74	3.76		28.6533	2.29883	0.047	0.011	n.d.	207	23	221.1	8.7	48	280		222.1	8.8		6.3772	78.2904
13SGM44_2	220	2.594		28.169	2.06308	0.0489	0.0039	n.d.	218	11	224.9	8.1	142	94		225.4	8.1		3.06803	36.8608
13SGM44_13	16.3	8.9		27.6243	3.43396	0.063	0.02	n.d.	278	41	229	14	707	338		226	14		-21.3974	-208.734
13SGM44_24	98	40.7		28.2486	2.87274	0.043	0.011	n.d.	193	24	224	11	0.0002	304.247		226	11		13.8393	99.9999
13SGM44_25	36.5	10.95		28.0112	2.43235	0.044	0.019	n.d.	199	40	226.1	9.6	0.0002	497.039		228	9.7		11.9858	99.9999
13SGM44_7	80	5.36		27.7008	2.07181	0.049	0.014	n.d.	222	29	228.6	8.4	147	335		229.1	8.4		2.88714	35.6955
13SGM44_1	695	4.83		27.6243	2.06038	0.0507	0.0037	n.d.	229	11	229.2	8.4	226	84		229.3	8.4		0.08726	1.39616
13SGM44_23	53	9.71		27.5482	2.20082	0.041	0.012	n.d.	189	26	229.9	9	0.0001	302.973		232.6	9.1		17.7903	100
13SGM44_22	44.6	11.17		27.027	2.26443	0.044	0.017	n.d.	206	37	234.2	9.6	0.0002	444.719		236.2	9.7		12.041	99.9999
13SGM44_6	17.6	9.3		26.455	3.14941	0.022	0.022	n.d.	110	53	239	14	0.0002	568.62		248	14		53.9749	99.9999
13SGM44_9	10.3	7.3		23.9808	3.16294	0.082	0.026	n.d.	392	56	263	17	1245	311		253	16		-49.0494	-373.384
13SGM44_5	96	8.58		25.3165	1.92277	0.0386	0.0071	n.d.	194	18	249.7	9.3	0.0002	182.827		253.6	9.4		22.3068	99.9999
13SGM44_21	254	49.1		24.6305	2.00199	0.0492	0.0034	n.d.	247	12	257	10	156	81		257	10		3.89105	39.2996
13SGM44_11	46	3.78		24.8139	2.09348	0.041	0.011	n.d.	208	26	255	11	0.0001	277.725		258	11		18.4314	100
13SGM44_10	34.1	7.91		23.9234	2.40379	0.036	0.013	n.d.	191	33	264	13	0.0002	341.185		269	13		27.6515	99.9999
13sgm45_1	1619	0.852		90.8265	7.01204	0.0466	0.003	n.d.	69.4	3.4	70.6	2.7	28	77		70.7	2.7		1.69972	60.3399
13sgm45_5	1950	0.563		90.3342	7.58906	0.0481	0.0031	n.d.	71.9	3.7	71	3	103	76		70.9	3		-1.26761	-45.0704
13sgm45_2	1460	0.592		89.2857	8.76913	0.0471	0.0036	n.d.	71.3	4.3	71.8	3.5	53	91		71.8	3.5		0.696379	26.1838
13sgm45_17	1100	1.527		86.5801	6.97138	0.051	0.0041	n.d.	79.3	4.3	74	3	240	93		73.7	3		-7.16216	-224.324
13sgm45_20	1870	0.521		86.1326	6.82533	0.0472	0.0031	n.d.	73.9	3.7	74.4	2.9	58	78		74.4	2.9		0.672043	22.043
13sgm45_29	1520	1.166		84.8176	6.04299	0.0491	0.0033	n.d.	77.9	3.7	75.6	2.7	152	79		75.4	2.7		-3.04233	-101.058
13sgm45_16	1151	1.21		84.674	7.16969	0.0477	0.0033	n.d.	75.9	4	75.7	3.2	83	82		75.7	3.2		-0.264201	-9.64333
13sgm45_22	1240	1.132		84.317	6.32733	0.0477	0.0037	n.d.	76.2	4	76	2.8	83	92		76	2.8		-0.263158	-9.21053
13sgm45_18	669	0.915		82.5764	6.27335	0.061	0.0059	n.d.	98.4	5.8	77.6	2.9	638	104		76.3	2.9		-26.8041	-722.165
13sgm45_28	858	0.819		83.8926	6.05266	0.0477	0.0043	n.d.	76.6	4.3	76.4	2.7	83	107		76.4	2.7		-0.26178	-8.63874
13sgm45_19	628	1.177		83.8223	6.39382	0.0463	0.0046	n.d.	74.5	4.5	76.5	2.9	12	119		76.6	2.9		2.61438	84.3137
13sgm45_24	694	0.805		83.4028	5.98219	0.0495	0.0046	n.d.	79.8	4.5	76.8	2.7	171	108		76.6	2.7		-3.90625	-122.656
13sgm45_10	710	0.84		83.682	6.51249	0.0447	0.0037	n.d.	72.1	4	76.6	3	0.0002	92.4318		76.9	3		5.87467	99.9997
13sgm45_23	442	1.21		82.9187	6.80676	0.0503	0.0048	n.d.	81.5	4.9	77.3	3.2	208	111		77	3.1		-5.43338	-169.082
13sgm45_7	582	0.74		82.7815	6.03044	0.0494	0.0053	n.d.	80.3	5	77.4	2.8	166	125		77.2	2.8		-3.74677	-114.47
13sgm45_25	591	0.983		82.7815	5.96191	0.0487	0.0045	n.d.	79.2	4.5	77.4	2.8	132	109		77.3	2.8		-2.32558	-70.5426
13sgm45_3	613	0.606		82.6446	6.14712	0.0489	0.0043	n.d.	79.6	4.4	77.5	2.9	142	103		77.4	2.9		-2.70968	-83.2258
13sgm45_21	1250	1.39		82.1693	6.27916	0.047	0.0034	n.d.	77	3.9	78	3	48	86		78	3		1.28205	38.4615
13sgm45_9	454	1.028		79.4281	6.11956	0.0665	0.0071	n.d.	110.9	6.9	80.7	3.1	821	111		78.7	3		-37.4226	-917.348
13sgm45_30	681	0.928		81.6993	6.47454	0.0443	0.0039	n.d.	73.2	4.2	78.4	3.1	0.0001	107.358		78.8	3.1		6.63265	99.9999
13sgm45_4	615	0.812		79.3021	5.84861	0.0494	0.0044	n.d.	83.6	4.6	80.8	3	166	104		80.6	3		-3.46535	-105.446
13sgm45_8	466	0.869		79.0514	6.24912	0.0439	0.005	n.d.	74.9	5	81	3.2	0.0002	135.899		81.4	3.2		7.53086	99.9998
13sgm45_27	740	1.127		77.7001	5.49394	0.0478	0.0045	n.d.	82.6	4.7	82.4	2.9	88	112		82.4	2.9		-0.242718	-6.79612
13sgm45_12	570	0.962		76.1615	6.38063	0.0569	0.006	n.d.	99.5	6.4	84.1	3.5	487	116		83.1	3.5		-18.3115	-479.073
13sgm45_14	505	0.859		75.4148	5.34615	0.0589	0.0069	n.d.	103.8	6.8	84.9	3	562	128		83.7	2.9		-22.2615	-561.955
13sgm45_15	440	1.418		74.9625	6.18132	0.0483	0.0057	n.d.	86.4	6	85.4	3.5	113	139		85.4	3.5		-1.17096	-32.3185
13sgm45_11	308	1.876		72.9927	5.86073	0.0648	0.0077	n.d.	117.2	7.9	87.7	3.5	767	125		85.8	3.4		-33.6374	-774.572
13sgm45_13	730	1.731		73.5294	5.94723	0.0474	0.0036	n.d.	86.4	4.6	87.1	3.5	68	90		87.1	3.5		0.803674	21.9288
13sgm45_26	335	0.646		40.8831	2.84142	0.0492	0.0045	n.d.	155.8	8.3	155.8	5.3	156	107		155.8	5.3		0	-0.12837
13sgm45_6	1250	3.72		6.82594	0.605715	0.0813	0.0034	n.d.	986	31	881	37	1228	41		868	36		-11.9183	-39.3871
13SGM46_2	639	0.809		95.057	6.68652	0.0485	0.0066	n.d.	69	5.1	67.5	2.4	123	160		67.4	2.4		-2.22222	-82.2222
13SGM46_21	451	1.441		95.1475	7.51403	0.0452	0.0057	n.d.	64.4	4.6	67.4	2.6	0.0002	157.813		67.6	2.7		4.45104	99.9997
13SGM46_14	150	1.083		92.8505	7.50046	0.056	0.016	n.d.	81	12	69.1	2.8	451	317		68.3	2.7		-17.2214	-552.677
13SGM46_3	156	1.454		89.5255	7.37363	0.062	0.019	n.d.	93	14	71.6	2.9	673	328		70.3	2.9		-29.8883	-839.944
13SGM46_1	930	1.031		90.009	6.72434	0.0489	0.005	n.d.	73.3	4.5	71.2	2.6	142	120		71.1	2.6		-2.94944	-99.4382
13SGM46_18	265	1.751		88.8099	6.54638	0.052	0.0073	n.d.	78.8	6	72.2	2.6	284	161		71.8	2.6		-9.14127	-293.352
13SGM46_4	331	1.818		87.6424	6.75945	0.0485	0.0076	n.d.	74.6	6.3	73.1	2.8	123	185		73	2.8		-2.05198	-68.2627
13SGM46_19	970	1.459		87.8735	6.48627	0.0463	0.0041	n.d.	71.2	4	72.9	2.7	12	106		73.1	2.7		2.33196	83.5391
13SGM46_17	188	1.352		87.4891	6.96545	0.048	0.018	n.d.	74	14	73.3	2.9	98	444		73.2	2.9		-0.95498	-33.6971
13SGM46_13	168	2.033		86.9565	7.03214	0.045	0.014	n.d.	70	11	73.7	3	0.0001	365.743		73.9	3		5.02035	99.9999
13SGM46_6	54	1.452		89.2857	9.56633	0.016	0.038	n.d.	25	29	71.8	3.8	0.0002	990.797		74.6	4		65.1811	99.9997
13SGM46_15	131	1.505		89.5255	8.01482	0.005	0.022	n.d.	7.8	17.1	71.6	3.2	0.0002	560.72		75.4	3.4		89.1061	99.9997
13SGM46_20	1270	1.515		83.1947	6.43686	0.0585	0.0043	n.d.	93.9	4.8	77	3	548	80		76	2.9		-21.9481	-611.688
13SGM46_12	298	1.227		84.4595	7.84674	0.0394	0.0095	n.d.	63.3	7.9	75.9	3.5	0.0002	254.775		76.7	3.5		16.6008	99.9997
13SGM46_16	113	1.342		85.8369	6.85222	0.02	0.015	n.d.	32	12	74.7	3	0.0002	392.631		77.2	3.1		57.162	99.9997
13SGM46_8	91	1.893		83.8926	7.74177	0.03	0.041	n.d.	49	33	76.4	3.5	0.0001	1171.49		78.1	3.6		35.8639	99.9999
13SGM46_10	91	2.14		81.9001	8.04915	0.048	0.038	n.d.	79	30	78.2	3.8	98	937		78.2	3.8		-1.02302	-25.3197
13SGM46_11	52	1.788		81.3008	9.25375	0.044	0.038	n.d.	73	31	78.8	4.5	0.0002	994.077		79.2	4.5		7.36041	99.9997
13SGM46_7	98	1.657		83.8926	7.74177	0.012	0.026	n.d.	20	21	76.4	3.5	0.0002	708.643		79.8	3.7		73.822	99.9997
13SGM46_9	54	1.561		69.9301	8.31336	0.081	0.098	n.d.	150	85	91.5	5.4	1221	1189		87.7	5.2		-63.9344	-1234.43
13SGM46_5	94	7.88		23.3645	1.85606	0.0498	0.0092	n.d.	262	23	270	11	185	215		271	11		2.96296	31.4815
Pine Mountain block
20MP1-1	219.363	2.68388		81.483	1.5559	0.0792179	0.00891997	-0.251833	127.7	7.1	78.6	0.7	1177	111		76.4	0.7		-62.4682	-1397.46
20MP1-4	753.233	3.53103		79.454	1.71236	0.0535715	0.0026381	0.0561197	90.2	2.3	80.6	0.9	352	56		80	0.9		-11.9107	-336.725
20MP1-5	431.305	1.44379		80.6335	1.98675	0.0487158	0.00142981	0.237871	81.2	1.3	79.5	1	133	35		79.3	1		-2.13836	-67.2956
20MP1-6	674.799	2.58228		79.8949	1.60473	0.0477116	0.00140444	0.589818	80.3	0.9	80.2	0.8	84	35		80.2	0.8		-0.124688	-4.73815
20MP1-7	254.693	1.57644		82.1105	1.73545	0.0472087	0.00177504	0.336953	77.4	1.4	78	0.8	59	45		78.1	0.8		0.769231	24.359
20MP1-8	319.46	1.46055		79.3028	1.40907	0.0481278	0.00164066	0.301131	81.6	1.3	80.8	0.7	105	40		80.7	0.7		-0.990099	-29.9505
20MP1-9	74.2764	1.30382		81.705	2.41022	0.0470031	0.00458465	0.142859	77.5	3.6	78.4	1.1	48	116		78.5	1.2		1.14796	38.7755
20MP1-10	440.45	1.08236		79.8134	1.69747	0.0485435	0.00151552	0.496439	81.7	1.1	80.3	0.8	125	37		80.2	0.8		-1.74346	-55.6663
20MP1-11	303.587	1.29725		80.1741	1.72091	0.0496163	0.00177575	-0.17515	83.1	1.8	79.9	0.9	176	42		79.7	0.9		-4.00501	-120.275
20MP1-12	540.585	1.47064		81.0696	1.52682	0.0512054	0.00198743	0.0278464	84.8	1.7	79	0.7	249	45		78.7	0.7		-7.34177	-215.19
20MP1-13	374.599	1.15378		84.2851	1.92139	0.0478255	0.00201378	0.542008	76.5	1.3	76	0.9	90	50		76	0.9		-0.657895	-18.4211
20MP1-14	187.208	2.09961		27.9152	1.24005	0.0832542	0.0014342	-0.40305	349.6	7.9	226.9	5	1274	17		217.8	4.8		-54.0767	-461.481
20MP1-15	761.898	3.32391		3.97785	0.0868971	0.099936	0.00108378	0.11367	1518.7	9.2	1446	14	1622	10		1431	14		-5.02766	-12.1715
20MP1-16	124.684	1.59063		81.3361	1.71736	0.0497479	0.00250652	0.235013	82.2	2	78.8	0.8	182	59		78.6	0.8		-4.31472	-130.964
20MP1-17	276.393	1.16685		81.3978	1.60461	0.055666	0.00310847	0.391545	91.5	2.2	78.7	0.8	438	62		77.9	0.8		-16.2643	-456.544
20MP1-18	214.14	1.57232		76.1032	1.51434	0.101592	0.00339666	-0.0475248	171.5	3.1	84.2	0.8	1653	31		80.1	0.8		-103.682	-1863.18
20MP1-19	1339.86	4.64495		71.3911	2.46668	0.0520597	0.00163036	0.492009	97.2	1.5	89.7	1.5	287	36		89.2	1.5		-8.3612	-219.955
20MP1-20	353.031	1.39373		81.8765	2.13578	0.0474112	0.00175965	0.126188	78	1.6	78.3	1	69	44		78.3	1		0.383142	11.8774
20MP1-21	187.152	1.23478		80.7873	1.53285	0.0565389	0.00470517	-0.158487	93.5	3.9	79.3	0.7	473	92		78.7	0.7		-17.9067	-496.469
20MP1-22	2383.33	22.3095		81.258	1.97683	0.0481915	0.00080595	0.551444	79.8	0.8	78.8	1	108	20		78.8	1		-1.26904	-37.0558
20MP1-23	337.271	1.23058		77.8369	1.76732	0.0657106	0.0111236	-0.63685	111.8	9.8	82.3	0.9	796	177		80.4	0.9		-35.8445	-867.193
20MP1-24	145.64	0.163046		69.1234	1.52148	0.184234	0.00483174	0.45332	317.7	3.5	92.6	1	2691	22		76.7	0.8		-243.089	-2806.05
20MP1-25	225.653	1.9722		61.3567	2.18916	0.0608137	0.00289299	0.303984	130	3.1	104.2	1.8	632	51		102.6	1.8		-24.7601	-506.526
20MP1-26	340.266	1.28792		77.5537	1.26199	0.0485123	0.00162196	0.433729	84	1.2	82.6	0.7	123	39		82.5	0.7		-1.69492	-48.9104
20MP1-27	379.39	1.11458		79.9489	1.50337	0.0483985	0.00142191	-0.0807009	81.4	1.4	80.1	0.7	118	35		80.1	0.7		-1.62297	-47.3159
20MP1-28	555.761	3.15875		73.6778	1.87606	0.0496804	0.0012315	0.370792	90.2	1.2	86.9	1.1	179	29		86.7	1.1		-3.79747	-105.984
20MP1-29	310.667	1.40803		81.0603	1.44048	0.049112	0.00175485	0.502129	81.4	1.2	79	0.7	152	42		78.9	0.7		-3.03797	-92.4051
20MP1-30	645.044	2.73839		82.5663	0.939944	0.0479358	0.00100192	-0.214863	78.2	1	77.6	0.4	95	25		77.6	0.4		-0.773196	-22.4227
20MP1-31	394.445	1.32703		75.5239	1.66228	0.0862453	0.0112994	-0.301634	148.4	9.6	84.8	0.9	1343	127		81.9	0.9		-75	-1483.73
20MP1-32	476.734	0.285714		79.9859	1.20238	0.0476927	0.00125788	0.303118	80.2	1	80.1	0.6	83	31		80.1	0.6		-0.124844	-3.62047
20MP1-33	185.756	1.51231		76.0924	1.88511	0.0662125	0.00615364	-0.606843	115	6	84.2	1	812	97		82.2	1		-36.5796	-864.371
20MP1-34	399.598	0.885945		77.8038	1.18778	0.0510128	0.00132235	-0.260244	87.8	1.4	82.3	0.6	240	30		82	0.6		-6.68287	-191.616
20MP1-35	224.422	1.0266		83.1923	1.80322	0.0483006	0.00195342	0.326144	78.2	1.5	77	0.8	113	48		77	0.8		-1.55844	-46.7532
20MP1-36	324.237	3.18589		15.3732	1.32463	0.103394	0.0018316	-0.255104	666	23	406	17	1685	16		382	16		-64.0394	-315.025
20MP1-37	411.472	1.51894		80.5915	1.65575	0.0509647	0.00182755	0.232286	84.8	1.5	79.5	0.8	238	41		79.2	0.8		-6.66667	-199.371
20MP1-38	240.549	0.984309		80.7271	1.42368	0.0483217	0.00190594	0.346026	80.5	1.4	79.4	0.7	114	47		79.3	0.7		-1.38539	-43.5768
20MP1-39	557.272	1.90672		80.382	1.57647	0.0503398	0.0017546	0.0240937	84.1	1.6	79.7	0.8	210	40		79.4	0.8		-5.5207	-163.488
20MP1-40	995.499	0.623264		81.1916	2.23968	0.0498208	0.00104426	0.29304	82.4	1.2	78.9	1.1	186	24		78.7	1.1		-4.43599	-135.741
20MP1-41	515.861	1.43419		79.2985	1.75755	0.0472505	0.00115379	0.143882	80.1	1.2	80.8	0.9	61	29		80.8	0.9		0.866337	24.505
20MP1-42	443.589	2.65739		73.1035	2.34029	0.0596233	0.00226865	0.0795031	108.2	2.4	87.6	1.4	589	41		86.3	1.4		-23.516	-572.374
20MP1-43	416.793	1.75976		81.6955	1.37896	0.0482085	0.0014338	0.157098	79.4	1.2	78.4	0.7	108	35		78.4	0.7		-1.27551	-37.7551
20MP1-44	476.308	1.21121		80.1003	1.57074	0.0503772	0.0013022	-0.0860302	84.4	1.4	80	0.8	211	30		79.7	0.8		-5.5	-163.75
20MP1-45	185.695	2.10182		79.5553	1.48599	0.0496047	0.00237958	0.147102	83.7	2	80.5	0.7	175	56		80.3	0.7		-3.97516	-117.391
20MP1-46	527.561	1.12689		80.794	1.65527	0.0474767	0.00149137	0.121767	79.1	1.3	79.3	0.8	72	37		79.3	0.8		0.252207	9.20555
20MP1-47	1035.85	5.40166		81.3203	1.8088	0.0483904	0.000905482	0.377946	80	0.9	78.8	0.9	117	22		78.7	0.9		-1.52284	-48.4772
20MP1-48	206.297	1.51546		79.4597	1.74488	0.0480154	0.00182049	0.414637	81.2	1.4	80.6	0.9	99	45		80.6	0.9		-0.744417	-22.8288
20MP1-49	331.121	1.10338		77.1828	1.55659	0.0556625	0.00367898	-0.004355	96.2	3.2	83	0.8	438	74		82.2	0.8		-15.9036	-427.711
20MP1-50	165.49	2.44885		81.1669	2.3446	0.0490575	0.00184706	-0.155776	81.2	2	78.9	1.1	150	44		78.8	1.1		-2.91508	-90.1141
20MP1-51	306.116	1.66366		77.861	1.84091	0.0480502	0.00127709	0.339524	82.9	1.2	82.3	1	101	31		82.2	1		-0.72904	-22.7217
20MP1-52	241.518	1.14494		75.8028	1.84851	0.0475328	0.00172162	0.390651	84.2	1.4	84.5	1	75	43		84.5	1		0.35503	11.2426
20MP1-53	254.714	1.10402		78.4276	1.85186	0.0498148	0.00178223	0.354612	85.2	1.4	81.7	1	185	42		81.5	1		-4.28397	-126.438
20MP1-54	609.658	1.15732		77.4207	1.79104	0.049678	0.00125303	0.189471	86	1.3	82.7	1	179	29		82.5	0.9		-3.99033	-116.445
20MP1-55	215.553	1.45468		76.9006	1.5287	0.0496001	0.00148569	-0.122958	86.5	1.6	83.3	0.8	175	35		83.1	0.8		-3.84154	-110.084
20MP1-56	164.204	1.50613		76.2947	2.0489	0.0839652	0.00971556	-0.59161	143.4	8.9	83.9	1.1	1291	113		80.1	1.1		-70.9178	-1438.74
20MP1-57	524.311	1.37096		80.8689	1.43499	0.0479316	0.000983183	0.42522	79.7	0.8	79.2	0.7	95	24		79.2	0.7		-0.631313	-19.9495
20MP1-58	302.226	1.3073		78.0979	1.42193	0.0731238	0.00693545	-0.106122	123.2	5.7	82	0.7	1016	96		80.2	0.7		-50.2439	-1139.02
20MP1-59	263.269	1.36592		80.1989	1.3932	0.049041	0.00146038	0.302376	82.2	1.2	79.9	0.7	149	35		79.7	0.7		-2.8786	-86.4831
20MP1-60	361.812	1.58013		82.7391	1.54963	0.0550028	0.00221615	-0.218339	89	2	77.4	0.7	411	45		76.7	0.7		-14.9871	-431.008
20MP1-61	538.75	1.05705		80.6662	1.79699	0.0523263	0.00176147	0.31118	86.9	1.4	79.4	0.9	299	38		79	0.9		-9.44584	-276.574
20MP1-62	571.943	1.20913		81.8395	1.40424	0.0518164	0.00157286	0.275159	84.9	1.2	78.3	0.7	276	35		77.9	0.7		-8.42912	-252.49
20MP1-63	145.811	1.36067		81.7556	1.91255	0.0595494	0.00635686	0.00944358	97.1	5.1	78.4	0.9	586	116		77.2	0.9		-23.852	-647.449
20MP3-43	260.516	1.08665		84.0236	1.7244	0.0493206	0.00158812	0.470457	79	1.1	76.3	0.8	162	38		76.1	0.8		-3.53866	-112.32
20MP3-42	242.939	0.946755		83.2295	1.69294	0.0481364	0.00198763	-0.0384412	77.9	1.8	77	0.8	105	49		77	0.8		-1.16883	-36.3636
20MP3-45	1408.66	2.35663		66.0359	3.41118	0.0492543	0.000787116	-0.333804	99.4	2.8	96.9	2.5	159	19		96.7	2.5		-2.57998	-64.0867
20MP3-25	476.175	4.11709		63.8078	3.15142	0.052472	0.00157256	-0.542126	109	3.6	100.2	2.5	305	34		99.7	2.4		-8.78244	-204.391
20MP3-34	614.719	3.68667		58.415	6.09936	0.0606558	0.00268398	-0.562023	135.8	8.5	109.4	5.7	626	48		107.7	5.6		-24.1316	-472.212
20MP3-27	1379.96	5.85519		58.3512	3.07989	0.060758	0.00699847	0.148711	136.2	7.6	109.5	2.9	630	124		107.8	2.8		-24.3836	-475.342
20MP3-22	546.638	4.18746		57.3465	2.99703	0.0501087	0.000973229	0.00258815	115.5	3	111.4	2.9	199	23		111.2	2.9		-3.68043	-78.6355
20MP3-6	946.535	2.76877		56.7631	0.970402	0.0497826	0.00108518	0.377144	115.9	1.2	112.6	1	184	25		112.4	1		-2.93073	-63.4103
20MP3-33	460.769	3.10768		53.7937	3.56181	0.0506716	0.00109215	-0.534582	123.9	4.7	118.7	3.9	225	25		118.4	3.9		-4.38079	-89.5535
20MP3-31	503.54	2.30269		51.9307	1.77666	0.0512157	0.0010212	-0.107526	129.4	2.5	123	2.1	250	23		122.5	2.1		-5.20325	-103.252
20MP3-26	177.369	1.03314		44.4624	1.59191	0.0534439	0.00135978	0.546505	155.6	2.2	143.4	2.5	347	29		142.6	2.5		-8.50767	-141.98
20MP3-14	225.294	0.936424		44.3274	0.800491	0.0502517	0.00119734	-0.124282	147.4	2.2	143.8	1.3	206	28		143.6	1.3		-2.50348	-43.2545
20MP3-12	254.342	0.920564		43.1404	0.575911	0.0493088	0.000987604	0.325142	148.5	1.4	147.7	1	161	23		147.7	1		-0.541638	-9.00474
20MP3-5	1500.01	5.39907		43.0103	0.539452	0.050654	0.000579852	0.128996	152.7	1.1	148.2	0.9	224	13		147.9	0.9		-3.03644	-51.1471
20MP3-8	281.67	0.811605		42.5013	0.792652	0.0494719	0.00150234	0.425706	151.1	2	149.9	1.4	169	35		149.8	1.4		-0.800534	-12.7418
20MP3-13	529.866	0.634552		42.4452	0.742403	0.0490573	0.0011498	0.457544	150.1	1.5	150.1	1.3	150	27		150.1	1.3		0	0.0666223
20MP3-11	141.374	0.591621		42.2993	0.994918	0.0507015	0.00181351	0.221037	155.2	2.8	150.6	1.8	226	41		150.3	1.7		-3.05445	-50.0664
20MP3-24	106.356	1.08104		42.2778	0.679118	0.0492223	0.00224622	-0.0174654	151.1	3.4	150.7	1.2	157	53		150.7	1.2		-0.265428	-4.18049
20MP3-3	277.799	0.637145		42.0937	0.68632	0.0519529	0.00145506	0.0314531	159.5	2.4	151.4	1.2	282	32		150.8	1.2		-5.35007	-86.2616
20MP3-1	358.682	1.3977		41.6959	0.841274	0.0516853	0.00131986	0.4083	160.1	1.9	152.8	1.5	270	29		152.3	1.5		-4.77749	-76.7016
20MP3-10	461.003	1.11973		41.6384	0.759295	0.0504389	0.00118204	0.42253	156.8	1.7	153	1.4	214	27		152.7	1.4		-2.48366	-39.8693
20MP3-40	280.38	2.60947		41.3808	1.25101	0.0518417	0.00138722	0.475384	161.7	2.2	153.9	2.3	277	31		153.4	2.3		-5.06823	-79.987
20MP3-9	493.41	4.42354		41.2945	0.963484	0.0497662	0.000970693	0.132116	156	2.1	154.2	1.8	183	23		154.1	1.8		-1.16732	-18.677
20MP3-17	296.83	1.40255		41.0127	0.694073	0.0515072	0.00108156	0.22198	162.1	1.8	155.3	1.3	263	24		154.8	1.3		-4.37862	-69.3496
20MP3-28	2457.68	7.99303		40.8294	0.666705	0.0502467	0.000754848	0.322246	159.1	1.3	156	1.3	205	17		155.8	1.3		-1.98718	-31.4103
20MP3-37	174.578	0.953102		40.7008	0.964166	0.0525177	0.00187175	0.278576	166.2	2.8	156.5	1.8	307	41		155.8	1.8		-6.19808	-96.1661
20MP3-36	1565.83	0.611471		40.8543	0.671387	0.0487947	0.000846729	0.538311	154.7	1.2	155.9	1.3	137	20		156	1.3		0.769724	12.1232
20MP3-15	958.775	8.7865		40.7825	0.714413	0.0493238	0.000687226	0.196653	156.5	1.5	156.2	1.4	162	16		156.1	1.4		-0.192061	-3.71319
20MP3-35	176.656	1.44283		40.7096	0.963831	0.0509254	0.00142199	-0.25613	161.5	3.1	156.4	1.8	236	32		156.1	1.8		-3.26087	-50.8951
20MP3-18	141.215	0.612983		40.5931	0.817445	0.0523319	0.00203087	0.201163	166.1	3.1	156.9	1.6	299	44		156.3	1.6		-5.86361	-90.5672
20MP3-4	61.9866	1.20105		40.1869	1.1211	0.0517205	0.00202528	0.112991	165.8	3.5	158.4	2.2	272	45		158	2.2		-4.67172	-71.7172
20MP3-21	432.92	0.678839		40.147	0.698844	0.0521579	0.00100807	0.385028	167.2	1.6	158.6	1.4	291	22		158	1.4		-5.42245	-83.4805
20MP3-7	184.751	1.329		40.0015	0.884875	0.0509679	0.00120626	0.265064	164.3	2.1	159.2	1.7	238	27		158.8	1.7		-3.20352	-49.4975
20MP3-41	268.878	1.25582		39.6807	0.970487	0.0497279	0.00130071	0.679968	161.8	1.5	160.4	1.9	181	30		160.4	1.9		-0.872818	-12.8429
20MP3-32	565.085	1.53147		39.4243	0.831815	0.0500668	0.00114904	0.354049	163.8	1.9	161.5	1.7	197	27		161.3	1.7		-1.42415	-21.9814
20MP3-39	247.944	1.21717		39.3407	1.30429	0.0519225	0.00140625	0.0589385	169.7	3.2	161.8	2.6	281	31		161.3	2.6		-4.88257	-73.6712
20MP3-2	306.761	2.2291		39.3957	0.800956	0.0493831	0.00142758	0.551393	161.8	1.8	161.6	1.6	165	34		161.6	1.6		-0.123762	-2.10396
20MP3-16	152.789	0.87552		39.0107	0.914347	0.0499415	0.00173402	0.279234	165	2.7	163.2	1.9	191	40		163	1.9		-1.10294	-17.0343
20MP3-44	269.175	1.10079		38.6153	1.2738	0.0504506	0.000827416	0.0768162	168.1	2.8	164.8	2.7	215	19		164.6	2.7		-2.00243	-30.4612
20MP3-19	197.956	2.96788		38.5967	0.724642	0.0489069	0.00117582	0.382703	163.4	1.8	164.9	1.5	142	28		165	1.5		0.909642	13.8872
20MP3-23	635.466	1.81923		38.5026	1.01869	0.0505472	0.000752415	0.000806198	168.9	2.4	165.3	2.2	219	17		165.1	2.2		-2.17786	-32.4864
20MP3-38	641.662	2.12801		37.2722	1.03766	0.0498207	0.00074966	-0.257857	171.7	2.8	170.7	2.3	186	18		170.6	2.3		-0.585823	-8.96309
20MP3-20	144.205	1.41406		35.6409	1.10624	0.0539524	0.00174728	0.0444322	192.4	3.8	178.4	2.7	368	36		177.4	2.7		-7.84753	-106.278
20MP7-2	227.229	1.54148		82.1074	1.81317	0.0471479	0.00180346	0.454779	77.3	1.3	78	0.9	56	46		78	0.9		0.897436	28.2051
20MP7-3	145.889	1.5224		81.6739	2.37566	0.0567915	0.00385792	-0.056223	92.9	3.3	78.4	1.1	482	75		482	75		-18.4949	-514.796
20MP7-30	47.8349	414.947		4.71499	0.168503	0.0900139	0.00298314	0.602986	1309	11	1240	20	1425	32		1425	32		-5.56452	-14.9194
20MP7-5	427.481	43.6156		4.03842	0.089997	0.090646	0.001346	0.0790175	1431.1	9.9	1426	14	1438	14		1438	14		-0.357644	-0.841515
20MP7-9	54.8487	389.552		4.22352	0.136204	0.0925376	0.00207975	0.321541	1413	13	1370	20	1478	21		1478	21		-3.13869	-7.88321
20MP7-17	46.9816	408.858		4.12674	0.140695	0.0935336	0.00229547	0.389405	1439	13	1399	21	1498	23		1498	23		-2.85919	-7.07648
20MP7-8	43.5317	403.892		3.81944	0.136019	0.0936105	0.00248563	0.124026	1499	16	1499	24	1499	25		1499	25		0	0
20MP7-10	35.4156	408.725		4.09765	0.142228	0.094143	0.00231059	0.439607	1449	13	1408	22	1510	23		1510	23		-2.91193	-7.24432
20MP7-6	579.145	62.0896		3.79437	0.066957	0.0970905	0.0015611	0.364387	1533.2	7.5	1508	12	1568	15		1568	15		-1.67109	-3.97878
20MP7-4	448.584	76.3655		3.6326	0.084624	0.097382	0.00100127	-0.0773724	1570	10	1568	16	1573.7	9.6		1573.7	9.6		-0.127551	-0.36352
20MP7-39	23.7776	393.781		6.52025	0.494484	0.0985948	0.00310248	-0.345484	1144	31	920	33	1597	29		1597	29		-24.3478	-73.587
20MP7-28	25.0891	473.673		3.6354	0.11422	0.0992401	0.00287251	0.359117	1585	14	1566	22	1609	27		1609	27		-1.21328	-2.74585
20MP7-37	41.3802	363.904		4.30942	0.125553	0.0994206	0.00267634	0.311705	1452	13	1345	18	1612	25		1612	25		-7.95539	-19.8513
20MP7-13	29.8021	328.99		3.59502	0.140004	0.100355	0.00253334	0.471408	1603	14	1582	27	1630	23		1630	23		-1.32743	-3.03413
20MP7-22	37.866	333.412		3.49755	0.154602	0.100941	0.00270068	0.34065	1630	18	1621	32	1641	25		1641	25		-0.555213	-1.23381
20MP7-1	372.012	40.2748		4.18565	0.117102	0.101443	0.00173785	0.185793	1490	12	1381	17	1650	16		1650	16		-7.89283	-19.4786
20MP7-21	46.2141	564.257		6.0825	0.261451	0.101655	0.00261142	0.176992	1213	16	981	20	1654	24		1654	24		-23.6493	-68.6035
20MP7-7	31.6175	381.136		3.69634	0.15502	0.10183	0.00262964	0.247723	1592	17	1544	29	1657	24		1657	24		-3.10881	-7.31865
20MP7-26	2.58833	1348.28		4.43941	0.143761	0.103052	0.00277726	0.237207	1457	14	1310	19	1679	25		1679	25		-11.2214	-28.1679
20MP7-24	8.13505	674.694		3.81043	0.125065	0.103465	0.00285639	0.686265	1580.4	9.8	1502	22	1686	25		1686	25		-5.21971	-12.2503
20MP7-50	48.7031	330.616		3.61755	0.130511	0.103814	0.00379861	0.385729	1625	16	1573	25	1693	34		1693	34		-3.30579	-7.62873
20MP7-31	1.62603	811.775		3.56455	0.105588	0.103836	0.00319651	0.491227	1637	12	1594	21	1693	28		1693	28		-2.69762	-6.21079
20MP7-45	12.2333	229.756		3.41645	0.134185	0.104164	0.00304277	0.420203	1674	16	1655	29	1699	27		1699	27		-1.14804	-2.65861
20MP7-11	4.61635	251.619		4.06448	0.140035	0.104448	0.00278459	0.403818	1537	13	1418	22	1704	25		1704	25		-8.3921	-20.1693
20MP7-20	7.14707	250.6		3.43984	0.152255	0.104618	0.0024544	0.486491	1672	16	1645	32	1707	22		1707	22		-1.64134	-3.769
20MP7-33	8.94113	293.664		3.48698	0.139836	0.105312	0.00318583	0.497724	1667	15	1625	29	1719	28		1719	28		-2.58462	-5.78462
20MP7-4	4.92029	389.361		3.41583	0.117318	0.105341	0.00236795	0.346226	1684	14	1655	25	1719	21		1719	21		-1.75227	-3.86707
20MP7-15	2.77387	432.749		3.68987	0.145799	0.106019	0.00341052	0.370917	1626	16	1546	27	1731	30		1731	30		-5.17464	-11.9664
20MP7-6	17.8775	1135.37		4.28143	0.247522	0.106056	0.00202239	0.365099	1508	21	1353	35	1732	17		1732	17		-11.456	-28.0118
20MP7-2	14.1629	1181.29		3.60918	0.129908	0.106167	0.00232385	-0.287088	1645	19	1577	25	1734	20		1734	20		-4.31198	-9.95561
20MP7-23	2.49042	628.693		3.78845	0.148302	0.106405	0.00252408	0.431752	1608	15	1510	26	1738	22		1738	22		-6.49007	-15.0993
20MP7-5	4.083	210.514		3.32857	0.111758	0.106755	0.00343168	0.540942	1716	13	1693	25	1744	29		1744	29		-1.35854	-3.0124
20MP7-14	2.66464	412.752		5.32961	0.23922	0.107058	0.00269146	0.573545	1347	14	1109	23	1749	23		1749	23		-21.4608	-57.7096
20MP7-40	2.84838	788.144		3.93889	0.0981808	0.107436	0.00396847	0.496839	1584	13	1458	16	1756	34		1756	34		-8.64198	-20.439
20MP7-19	3.05087	225.982		3.17529	0.0907894	0.107449	0.00330873	0.454399	1761	13	1765	22	1756	28		1756	28		0.226629	0.509915
20MP7-34	1.88714	262.185		3.40648	0.121212	0.107712	0.0034304	0.346541	1704	16	1659	26	1760	29		1760	29		-2.71248	-6.088
20MP7-18	4.67869	314.688		3.46624	0.140516	0.107873	0.00320134	0.318881	1691	17	1634	29	1763	27		1763	27		-3.48837	-7.89474
20MP7-43	3.19609	299.925		3.32066	0.138556	0.108263	0.0032548	0.656515	1730	13	1697	31	1770	27		1770	27		-1.94461	-4.30171
20MP7-29	3.06182	1474.62		3.44252	0.112545	0.108612	0.00264121	0.266987	1703	15	1644	24	1775	22		1775	22		-3.58881	-7.96837
20MP7-41	1.77772	950.993		3.52008	0.125358	0.108735	0.00306843	0.425434	1685	14	1612	25	1778	26		1778	26		-4.52854	-10.2978
20MP7-35	1.71468	603.743		3.79189	0.125563	0.11058	0.00295789	0.618473	1638	11	1509	22	1808	24		1808	24		-8.54871	-19.8144
20MP7-12	9.08439	677.149		3.55043	0.152505	0.111159	0.00302973	0.28575	1696	18	1600	30	1818	25		1818	25		-6	-13.625
20MP7-32	4.50111	516.021		4.71571	0.263022	0.111774	0.00361838	0.255818	1473	22	1240	31	1828	29		1828	29		-18.7903	-47.4194
20MP7-3	2.78813	168.113		3.89122	0.152635	0.112095	0.00295993	0.297941	1628	16	1474	26	1833	24		1833	24		-10.4478	-24.3555
20MP7-46	2.0629	332.694		2.9255	0.0994198	0.112768	0.00257025	0.214452	1871	16	1895	28	1844	21		1844	21		1.26649	2.69129
20MP7-25	13.8659	405.912		3.34421	0.0975821	0.115419	0.00374383	0.142878	1777	17	1686	22	1886	29		1886	29		-5.39739	-11.8624
20MP7-42	2.36301	227.838		2.6548	0.106659	0.12915	0.00366083	0.404037	2073	17	2061	35	2086	25		2086	25		-0.582242	-1.213
20MP7-38	7.36454	405.917		3.1441	0.137135	0.130003	0.00417381	0.559319	1931	16	1780	34	2097	28		2097	28		-8.48315	-17.809
20MP7-27	4.39112	273.294		2.75578	0.0961272	0.13826	0.00518648	-0.237535	2101	25	1996	30	2205	33		2205	33		-5.26052	-10.4709
20MP7-48	6.4759	609.609		2.92172	0.113152	0.143141	0.00533902	-0.187978	2079	26	1898	32	2265	32		2265	32		-9.53635	-19.3361
20MP7-36	1.91456	509.057		2.83602	0.128367	0.14459	0.00530733	0.523801	2115	18	1947	38	2282	32		2282	32		-8.62866	-17.206
20MP7-44	4.09075	376.534		2.71367	0.129597	0.155087	0.00447124	0.294456	2217	22	2022	41	2402	25		2402	25		-9.64392	-18.7933
20MP7-1	3.88695	675.364		3.40863	0.168578	0.156049	0.00444912	0.142846	2020	23	1658	36	2413	24		2413	24		-21.8335	-45.5368
20MP7-16	2.05448	1317.19		2.40257	0.111546	0.161613	0.00565658	0.624496	2365	17	2243	44	2472	30		2472	30		-5.43914	-10.2095
20MP7-47	7.25562	346.116		1.70916	0.115072	0.270213	0.0114149	0.573355	3174	27	2969	80	3307	33		3307	33		-6.90468	-11.3843
20MP9-29	900.02	63.463		16.0589	0.662357	0.0938039	0.00348911	0.347068	600	10	389.4	7.8	1503	35		1503	35		-54.0832	-285.978
20MP9-4	221.162	5.50347		3.67948	0.118154	0.101252	0.00269986	0.298623	1591	14	1550	22	1646	25		1646	25		-2.64516	-6.19355
20MP9-32	2051.09	3.49598		3.10771	0.102361	0.102148	0.0033284	0.435738	1736	14	1798	26	1663	30		1663	30		3.44828	7.50834
20MP9-39	475.529	11.3454		3.51686	0.101105	0.102146	0.00304184	0.422152	1635	13	1613	21	1663	28		1663	28		-1.36392	-3.09981
20MP9-21	832.957	66.4859		3.56736	0.146431	0.102631	0.00379281	0.569689	1627	15	1593	29	1671	34		1671	34		-2.13434	-4.89642
20MP9-2	419.252	8.56102		3.48193	0.0992079	0.102658	0.00189025	0.648698	1647	8.8	1628	20	1672	17		1672	17		-1.16708	-2.7027
20MP9-33	582.758	8.00956		3.54532	0.137096	0.102779	0.00260596	0.481172	1633	14	1602	27	1674	23		1674	23		-1.93508	-4.49438
20MP9-7	544.228	11.2577		3.78804	0.169014	0.103113	0.00293972	0.414873	1582	17	1510	30	1680	26		1680	26		-4.76821	-11.2583
20MP9-18	908.319	8.59518		3.70585	0.154621	0.10335	0.00347267	0.534937	1602	15	1540	29	1684	31		1684	31		-4.02597	-9.35065
20MP9-22	283.053	13.9379		3.50102	0.137645	0.103707	0.00345809	0.409593	1651	16	1620	28	1691	31		1691	31		-1.91358	-4.38272
20MP9-17	542.123	8.85273		3.82503	0.143451	0.104426	0.00299755	0.633371	1585	12	1497	25	1703	26		1703	26		-5.87842	-13.7609
20MP9-51	390.771	9.87129		3.44624	0.123228	0.104745	0.0040165	0.632487	1672	13	1642	26	1709	35		1709	35		-1.82704	-4.08039
20MP9-52	402.217	8.75631		3.32655	0.118964	0.104986	0.0034854	0.62877	1703	12	1694	27	1713	31		1713	31		-0.531287	-1.12161
20MP9-13	272.765	3.03707		3.41793	0.0734018	0.105528	0.00317536	0.221177	1685	14	1654	16	1723	28		1723	28		-1.87424	-4.1717
20MP9-5	120.653	2.9075		3.31498	0.140023	0.105621	0.00270913	0.421051	1711	16	1700	32	1724	24		1724	24		-0.647059	-1.41176
20MP9-20	311.857	2.38339		3.25309	0.13776	0.106048	0.00205133	0.548235	1730	15	1728	32	1732	18		1732	18		-0.115741	-0.231481
20MP9-25	560.937	8.92732		3.52907	0.129519	0.106048	0.00359696	0.409581	1663	16	1608	26	1732	31		1732	31		-3.4204	-7.71144
20MP9-10	896.669	2.30257		3.62407	0.106107	0.106169	0.00332121	0.302793	1642	15	1571	20	1734	29		1734	29		-4.51941	-10.3756
20MP9-47	742.738	8.42095		3.70575	0.148563	0.106319	0.00400318	0.459584	1625	16	1540	27	1736	35		1736	35		-5.51948	-12.7273
20MP9-8	818.737	2.60046		3.44069	0.114504	0.106567	0.00315159	0.622245	1687	11	1645	24	1741	27		1741	27		-2.55319	-5.83587
20MP9-37	223.973	2.72976		3.19077	0.121903	0.106591	0.0032712	0.53437	1750	14	1757	29	1741	28		1741	28		0.398406	0.910643
20MP9-34	1437.99	3.35871		3.21455	0.114747	0.106628	0.0027478	0.475537	1744	14	1746	27	1742	24		1742	24		0.114548	0.229095
20MP9-60	332.377	3.15556		3.23758	0.134768	0.106851	0.00356762	0.463577	1740	16	1735	32	1746	31		1746	31		-0.288184	-0.634006
20MP9-16	557.538	9.61009		3.57386	0.108111	0.107304	0.00238463	0.283014	1662	13	1590	21	1753	20		1753	20		-4.5283	-10.2516
20MP9-55	448.306	4.50987		3.30842	0.153629	0.10763	0.00320573	0.506862	1728	17	1702	35	1759	27		1759	27		-1.52761	-3.349
20MP9-57	173.699	1.41724		3.25177	0.128107	0.107639	0.00384822	0.469401	1742	16	1729	30	1759	33		1759	33		-0.75188	-1.73511
20MP9-61	541.801	11.2017		3.61987	0.143521	0.107613	0.0036497	0.346093	1654	17	1572	28	1759	31		1759	31		-5.21628	-11.8957
20MP9-12	453.23	9.22264		3.43692	0.12931	0.107683	0.00278641	0.536955	1697	13	1646	27	1760	24		1760	24		-3.09842	-6.92588
20MP9-3	732.492	2.23223		3.20479	0.12231	0.107734	0.00367724	0.484589	1755	15	1751	29	1761	31		1761	31		-0.228441	-0.571102
20MP9-26	170.769	2.07174		3.33432	0.102813	0.107855	0.00323553	0.269795	1723	15	1691	23	1763	27		1763	27		-1.89237	-4.25784
20MP9-54	1472.93	3.20432		3.38647	0.136624	0.108063	0.00310539	0.562133	1712	14	1668	30	1766	26		1766	26		-2.63789	-5.8753
20MP9-43	341.88	1.61032		3.29796	0.121871	0.108116	0.00325553	0.35647	1734	16	1707	28	1767	28		1767	28		-1.58172	-3.51494
20MP9-28	786.823	9.28792		3.46672	0.124949	0.10848	0.00327126	0.621271	1696	12	1634	26	1773	28		1773	28		-3.79437	-8.50673
20MP9-11	879.618	3.40727		3.28131	0.108798	0.108548	0.00311315	0.104988	1742	17	1715	25	1774	26		1774	26		-1.57434	-3.44023
20MP9-40	383.97	2.14602		3.2401	0.120429	0.108954	0.00351272	0.354114	1755	17	1734	28	1781	29		1781	29		-1.21107	-2.7105
20MP9-49	794.589	3.84393		3.19362	0.141047	0.108962	0.00330594	0.727331	1768	13	1756	34	1781	28		1781	28		-0.683371	-1.42369
20MP9-1	112.976	1.22787		4.01713	0.141352	0.109253	0.00314835	0.336426	1582	15	1433	23	1786	26		1786	26		-10.3978	-24.6336
20MP9-53	250.999	3.2325		3.1356	0.124445	0.109841	0.00490905	0.277114	1790	21	1784	31	1796	41		1796	41		-0.336323	-0.672646
20MP9-56	320.358	2.6584		2.94528	0.161238	0.110538	0.00425609	0.278301	1848	24	1884	45	1807	35		1807	35		1.91083	4.08705
20MP9-30	219.404	4.58643		3.17586	0.137103	0.110563	0.0039867	0.254232	1785	20	1765	33	1808	33		1808	33		-1.13314	-2.43626
20MP9-48	203.405	2.61655		3.29955	0.137842	0.110694	0.003719	0.0854104	1754	21	1707	31	1810	31		1810	31		-2.75337	-6.03398
20MP9-50	421.608	3.6025		3.44892	0.122204	0.11097	0.00329557	0.52633	1719	13	1641	26	1815	27		1815	27		-4.7532	-10.6033
20MP9-36	406.626	2.66168		3.09455	0.0941288	0.111039	0.00329076	0.416797	1810	14	1805	24	1816	27		1816	27		-0.277008	-0.609418
20MP9-31	1198.08	13.827		3.74972	0.158846	0.111176	0.00410864	0.603051	1652	15	1524	29	1818	34		1818	34		-8.39895	-19.2913
20MP9-45	450.171	4.84769		3.29822	0.145038	0.111355	0.00330054	0.207937	1759	20	1707	33	1821	27		1821	27		-3.04628	-6.67838
20MP9-46	527.707	3.01537		3.31312	0.151154	0.112409	0.00334168	0.396721	1763	18	1700	34	1838	27		1838	27		-3.70588	-8.11765
20MP9-15	496.579	2.85751		3.12902	0.12287	0.112601	0.00285281	0.54532	1812	14	1788	31	1841	23		1841	23		-1.34228	-2.96421
20MP9-9	711.322	2.95645		3.27634	0.110386	0.11409	0.00290007	0.281589	1785	15	1717	25	1865	23		1865	23		-3.9604	-8.61969
20MP9-41	1048.08	1.52544		3.25074	0.118745	0.114615	0.00314775	0.182575	1795	17	1729	28	1873	25		1873	25		-3.81724	-8.32851
20MP9-19	537.092	1.35666		3.08112	0.112285	0.115606	0.00325885	0.375839	1848	16	1812	29	1889	25		1889	25		-1.98675	-4.24945
20MP9-6	599.602	11.2371		3.31913	0.110994	0.116837	0.00292487	0.38832	1794	14	1698	25	1908	22		1908	22		-5.65371	-12.3675
20MP9-42	223.807	1.87283		3.30561	0.148865	0.117831	0.00379724	0.111791	1804	22	1704	34	1923	29		1923	29		-5.86854	-12.8521
20MP9-24	1234.78	11.6825		3.34441	0.152099	0.125202	0.00377821	0.522832	1846	17	1686	34	2031	27		2031	27		-9.48992	-20.4626
20MP9-14	355.937	4.26062		2.91287	0.113648	0.130628	0.0045651	0.547067	2002	15	1903	32	2106	31		2106	31		-5.20231	-10.6674
20MP9-23	690.008	2.48869		3.21005	0.140315	0.133127	0.00379196	0.516045	1934	16	1748	33	2139	25		2139	25		-10.6407	-22.3684
20MP9-59	336.637	5.14356		2.9415	0.150782	0.13531	0.00708004	-0.0743693	2024	33	1886	42	2167	46		2167	46		-7.31707	-14.8993
20MP9-35	2222.39	4.53039		2.45209	0.077312	0.140133	0.00386903	0.455384	2217	14	2205	29	2228	24		2228	24		-0.544218	-1.04308
20MP9-44	751.197	6.33221		2.60857	0.119445	0.153623	0.00488501	-0.193542	2244	27	2092	41	2386	27		2386	27		-7.26577	-14.0535
20MP9-27	512.085	1.52068		2.60683	0.0938685	0.155839	0.00446663	0.399632	2258	16	2093	32	2410	24		2410	24		-7.88342	-15.1457
20MP9-38	162.171	2.78508		2.29345	0.0941841	0.16088	0.00536931	0.464115	2404	18	2333	40	2464	28		2464	28		-3.04329	-5.61509
20MP9-58	593.427	2.5719		2.12491	0.109915	0.168167	0.00602759	0.383267	2515	23	2486	53	2539	30		2539	30		-1.16653	-2.13194
20MP11b Clear-50	552.124	9.66471		54.9251	4.35647	0.0533558	0.0024327	-0.0326139	127.6	5.6	116.3	4.6	343	52		115.8	4.6		-9.71625	-194.927
20MP11b Clear-83	493.141	6.38887		49.3188	4.09282	0.0546684	0.0021106	-0.119047	144.4	6.4	129.4	5.3	398	43		128.4	5.3		-11.592	-207.573
20MP11b Clear-60	414.988	3.61884		25.7555	2.60928	0.0579629	0.00182913	0.135427	274	12	246	12	527	35		243	12		-11.3821	-114.228
20MP11b Clear-24	421.984	3.68869		20.7976	0.777722	0.0578449	0.00193569	0.493039	329.5	5	302.7	5.5	523	37		300.7	5.5		-8.85365	-72.7783
20MP11b orange-16	728.017	4.81651		19.6397	1.66092	0.0612775	0.00227617	0.147713	363	13	320	13	648	40		317	13		-13.4375	-102.5
20MP11b orange-32	278.456	6.43701		19.7119	2.53861	0.0565279	0.00128409	-0.294033	338	20	319	20	472	25		318	20		-5.95611	-47.9624
20MP11b Clear-39	1186.29	2.82015		19.4919	3.30898	0.0606799	0.00179029	0.106812	362	26	323	27	627	32		319	26		-12.0743	-94.1176
20MP11b Clear-6	389.739	4.72375		18.5936	5.15786	0.0586883	0.00217492	-0.646908	367	47	338	46	555	40		335	45		-8.57988	-64.2012
20MP11b orange-37	903.794	2.6356		16.0402	0.541896	0.0595605	0.00156459	0.125238	419.6	6.9	389.9	6.4	587	29		387.5	6.4		-7.61734	-50.5514
20MP11b Clear-38	979.738	4.80939		15.7958	0.7092	0.0599132	0.00189683	0.564512	427	6.6	395.7	8.6	599	34		393.2	8.6		-7.91003	-51.3773
20MP11b Clear-36	392.332	2.90152		15.3988	0.88623	0.059706	0.00148493	0.10329	435	11	406	11	592	27		403	11		-7.14286	-45.8128
20MP11b orange-31	984.188	4.3221		14.7769	0.745641	0.0614231	0.00186776	0.571873	459.9	7.7	422	10	653	33		419	10		-8.98104	-54.7393
20MP11b Clear-81	167.225	1.17424		14.4956	0.770726	0.0617776	0.00153567	0.129482	469	10	430	11	665	27		427	11		-9.06977	-54.6512
20MP11b Clear-2	680.28	3.82299		13.852	1.03894	0.0607244	0.00175621	0.0557916	480	15	449	16	629	31		447	16		-6.90423	-40.0891
20MP11b orange-45	375.316	4.07185		13.4897	0.469764	0.0573487	0.00194942	0.66641	468.2	5.3	461	7.7	504	37		460.4	7.7		-1.56182	-9.32755
20MP11b orange-28	621.345	2.94488		13.328	0.655147	0.062808	0.00174213	0.42177	508.1	9	466	11	701	30		463	11		-9.03433	-50.4292
20MP11b orange-44	487.209	2.24583		12.9427	0.524788	0.0610221	0.00163622	0.2859	508.3	8.3	479.8	9.4	639	29		477.3	9.3		-5.93997	-33.1805
20MP11b Clear-41	746.175	2.30765		12.9412	0.669987	0.0597229	0.00132533	0.469267	499.8	9	480	12	593	24		478	12		-4.125	-23.5417
20MP11b Clear-21	120.01	1.56883		12.8113	0.604027	0.0613164	0.00202628	0.288908	514.4	9.9	485	11	649	35		482	11		-6.06186	-33.8144
20MP11b Clear-48	277.981	2.18556		12.7285	0.657316	0.0604937	0.00203621	0.255873	512	11	488	12	620	36		485	12		-4.91803	-27.0492
20MP11b Clear-16	401.53	3.13969		12.6366	0.957221	0.0624859	0.00182461	0.0303095	528	17	491	18	690	31		488	18		-7.53564	-40.5295
20MP11b Clear-10	411.617	3.05419		12.5587	0.671589	0.0604932	0.00255476	0.321794	517	11	494	13	620	46		492	13		-4.65587	-25.5061
20MP11b Clear-30	275.57	0.435061		12.1811	0.681974	0.0710547	0.00383607	0.680744	599	9.9	509	14	958	55		500	13		-17.6817	-88.2122
20MP11b Clear-59	418.959	6.7504		12.0699	1.038	0.0613444	0.00172426	-0.048504	539	19	513	21	650	30		511	21		-5.06823	-26.7057
20MP11b orange-4	216.991	6.79934		12.0179	0.408397	0.0612052	0.00192396	0.203034	539.9	8.7	515.2	8.4	645	34		513	8.4		-4.79425	-25.1941
20MP11b Clear-4	186.965	1.25102		12.018	0.486674	0.0603751	0.00182854	0.400311	534.2	8.2	515	10	616	33		513.6	10		-3.72816	-19.6117
20MP11b Clear-78	1813.5	1.42252		11.9169	0.550851	0.0620982	0.00165292	0.319169	549.6	9.6	519	12	677	28		517	11		-5.89595	-30.4432
20MP11b orange-52	471.42	2.11968		11.8179	0.543235	0.0610773	0.00147409	0.438759	546.1	8.8	524	12	641	26		522	12		-4.21756	-22.3282
20MP11b orange-9	1080.33	3.4929		11.7501	0.518908	0.0610089	0.00176291	0.380337	548.1	9	527	11	639	31		525	11		-4.0038	-21.2524
20MP11b orange-57	638.068	1.80557		11.7506	0.740015	0.0601483	0.00155512	0.0958008	542	14	527	16	608	28		525	16		-2.8463	-15.37
20MP11b orange-22	835.722	2.24797		11.567	0.502442	0.0628137	0.00211201	0.540052	567.3	8.2	535	11	701	36		532	11		-6.03738	-31.028
20MP11b orange-2	778.432	2.38974		11.5004	0.528521	0.0611649	0.00195395	0.667844	558.3	7.4	537	12	644	34		536	12		-3.96648	-19.9255
20MP11b Clear-71	194.673	0.895571		11.3916	1.00002	0.065796	0.00249304	0.693643	595	15	542	23	799	40		538	23		-9.7786	-47.417
20MP11b Clear-46	216.692	1.96969		11.4226	0.486861	0.0614689	0.00216038	0.33456	563.4	9.8	541	11	655	38		539	11		-4.14048	-21.0721
20MP11b Clear-77	751.014	1.55299		11.3905	0.477353	0.061853	0.00165659	0.266201	567.3	9.4	542	11	668	29		540	11		-4.6679	-23.2472
20MP11b orange-12	156.133	1.96611		11.3958	0.446544	0.0617357	0.0021519	0.532821	566.3	7.8	542	10	664	37		540	10		-4.48339	-22.5092
20MP11b orange-54	544.272	2.82913		11.4151	0.328959	0.0600203	0.00119778	-0.246006	553.4	8.3	541.3	7.5	603	22		540.3	7.5		-2.23536	-11.3985
20MP11b Clear-65	397.175	2.1796		11.2532	0.573901	0.0599685	0.00161846	0.4181	559	10	549	13	601	29		548	13		-1.82149	-9.47177
20MP11b Clear-66	819.779	2.27422		11.1254	0.478045	0.0609736	0.00169733	0.398886	571.3	8.9	555	11	637	30		553	11		-2.93694	-14.7748
20MP11b orange-21	394.27	1.93676		11.1225	0.718482	0.0612135	0.00174335	0.397169	573	13	555	17	646	31		553	17		-3.24324	-16.3964
20MP11b Clear-11	877.356	2.48475		11.0858	0.405356	0.0641533	0.00165063	0.573616	595.4	6.8	556.8	9.8	746	27		553.2	9.7		-6.93247	-33.9799
20MP11b Clear-7	521.774	2.5996		10.9557	0.615782	0.061568	0.00193107	0.499584	582	11	563	15	658	34		561	15		-3.37478	-16.8739
20MP11b Clear-84	540.164	1.92069		10.9494	0.460779	0.0604521	0.00142142	0.290117	574.5	9.2	563	11	619	25		562	11		-2.04263	-9.94671
20MP11b Clear-37	832.654	2.04918		10.766	0.47148	0.0617673	0.00176147	0.346178	591.6	9.7	573	12	665	31		571	12		-3.24607	-16.0558
20MP11b orange-24	939.359	2.08855		10.7007	0.364771	0.0631632	0.00161457	0.20434	604.4	8.7	575.9	9.4	713	27		573.2	9.3		-4.94878	-23.8062
20MP11b Clear-74	690.197	1.41549		10.702	0.481463	0.0616705	0.00174323	0.478823	593.5	9	576	12	662	30		574	12		-3.03819	-14.9306
20MP11b orange-25	391.068	2.20656		10.7105	0.601851	0.0606381	0.00150369	0.518887	586	11	575	15	625	27		574	15		-1.91304	-8.69565
20MP11b orange-27	679.193	2.2513		10.6401	0.543485	0.0617623	0.00236876	0.482421	597	11	579	14	665	41		577	14		-3.10881	-14.8532
20MP11b Clear-27	450.687	2.45193		10.5127	0.423604	0.0616444	0.00162939	0.4155	601.4	8.6	586	11	661	28		584	11		-2.62799	-12.7986
20MP11b Clear-43	527.434	1.79769		10.482	0.643565	0.0609624	0.00160869	0.184399	598	14	587	17	637	28		586	17		-1.87394	-8.51789
20MP11b Clear-70	81.9618	2.60984		10.4307	0.483425	0.0637763	0.00180178	0.46413	620.6	9.7	590	13	733	30		587	13		-5.18644	-24.2373
20MP11b orange-59	172.138	1.62458		10.4297	0.878964	0.0607443	0.00170987	0.385618	598	18	590	24	629	30		589	24		-1.35593	-6.61017
20MP11b Clear-33	596.953	1.52619		10.4059	0.399906	0.0612138	0.00193642	0.396698	602.9	8.8	592	11	646	34		590	11		-1.84122	-9.12162
20MP11b orange-56	766.385	1.83876		10.3528	0.527912	0.0612409	0.00213098	0.765913	605.4	7.5	594	14	647	37		593	14		-1.91919	-8.92256
20MP11b orange-26	574.693	3.53096		10.2898	0.415098	0.0613513	0.00175307	0.362859	609	9.2	598	12	651	31		597	11		-1.83946	-8.86288
20MP11b Clear-42	224.651	1.97067		10.2521	0.428702	0.0610673	0.00212515	0.449223	608.6	9.3	600	12	641	37		599	12		-1.43333	-6.83333
20MP11b orange-8	146.233	1.2671		10.2577	0.369687	0.0608038	0.00177688	0.367765	606.3	8.5	600	10	631	31		599	10		-1.05	-5.16667
20MP11b Clear-1	419.493	1.78996		10.1675	0.516721	0.0620144	0.00194086	0.350974	619	11	605	15	674	33		603	15		-2.31405	-11.405
20MP11b Clear-14	335.922	2.31112		10.1835	0.475145	0.0616225	0.00179258	0.156735	616	12	604	13	660	31		603	13		-1.98675	-9.27152
20MP11b orange-29	446.512	1.76966		10.1669	0.51516	0.0624109	0.00169218	0.608957	622.5	9.4	605	15	687	29		603	15		-2.89256	-13.5537
20MP11b orange-39	460.532	2.1559		10.1808	0.360406	0.0613924	0.00168867	0.513894	614.2	7.3	604	10	652	30		603	10		-1.68874	-7.94702
20MP11b Clear-35	411.847	1.58756		10.163	0.436988	0.062113	0.00151516	0.195248	620	10	605	12	677	26		604	12		-2.47934	-11.9008
20MP11b Clear-40	577.512	2.5838		10.1526	0.433763	0.0629002	0.00174934	0.243969	627	11	606	12	704	30		604	12		-3.46535	-16.1716
20MP11b Clear-58	1416.55	1.35946		10.1636	0.469656	0.0613255	0.00170924	0.737863	614.5	7.3	605	13	650	30		604	13		-1.57025	-7.43802
20MP11b Clear-29	452.954	1.73503		10.1251	0.454484	0.0628781	0.00160794	0.284293	628	11	607	13	703	27		605	13		-3.45964	-15.8155
20MP11b orange-3	57.553	1.30248		10.1621	0.5544	0.0604556	0.00277821	0.122123	608	15	605	16	619	50		605	16		-0.495868	-2.31405
20MP11b orange-33	556.89	2.50235		10.122	0.507771	0.063055	0.00138003	0.585306	629.3	9.7	607	15	709	23		605	14		-3.67381	-16.804
20MP11b orange-14	152.371	1.98014		10.1011	0.458697	0.0633667	0.00233703	0.511326	632.6	9.7	609	13	720	39		606	13		-3.87521	-18.2266
20MP11b orange-19	548.155	1.59763		10.106	0.467653	0.0636397	0.00182411	0.301023	634	11	608	13	729	30		606	13		-4.27632	-19.9013
20MP11b orange-34	418.443	1.89998		10.102	0.410978	0.0640768	0.00203686	0.384124	637.8	9.7	608	12	743	34		606	12		-4.90132	-22.2039
20MP11b Clear-51	156.349	1.90539		10.0752	0.712757	0.0645479	0.00246418	0.460331	643	15	610	21	759	40		607	20		-5.40984	-24.4262
20MP11b Clear-28	377.259	1.86578		10.0816	0.414759	0.0624051	0.00189214	0.694778	626.3	6.9	610	12	687	32		608	12		-2.67213	-12.623
20MP11b Clear-45	442.283	1.77766		10.0838	0.377155	0.0621939	0.00173552	0.414919	624.7	8.4	610	11	680	30		608	11		-2.40984	-11.4754
20MP11b Clear-79	541.589	1.60046		10.0922	0.47741	0.0620613	0.0020002	0.46065	623	10	609	14	675	34		608	14		-2.29885	-10.8374
20MP11b Clear-17	322.901	1.87633		10.0719	0.447936	0.0624771	0.00203287	0.631506	627.3	8.1	610	13	690	35		609	13		-2.83607	-13.1148
20MP11b Clear-19	767.6	2.0907		10.0715	0.371246	0.0618955	0.00161647	0.365365	623	8.5	610	11	670	28		609	11		-2.13115	-9.83607
20MP11b Clear-34	479.826	1.47442		10.063	0.4656	0.0624678	0.00158459	0.368802	628	10	611	13	689	27		609	13		-2.78232	-12.766
20MP11b orange-7	223.924	3.23068		10.0784	0.369779	0.0605786	0.00162642	0.132935	612.7	9.8	610	11	623	29		610	11		-0.442623	-2.13115
20MP11b Clear-9	308.908	1.68077		10.0377	0.496542	0.0618949	0.00184942	0.210303	625	12	612	14	670	32		611	14		-2.12418	-9.47712
20MP11b orange-11	454.316	1.78702		10.0404	0.420488	0.0613736	0.00169067	0.526174	620.5	8.4	612	12	651	30		611	12		-1.38889	-6.37255
20MP11b orange-20	189.902	1.79453		9.99858	0.4411	0.0622475	0.00197491	0.483657	629	9.4	614	13	682	34		613	13		-2.443	-11.0749
20MP11b orange-40	174.407	1.77456		10.0131	0.288995	0.061106	0.00200923	-0.0123136	620	10	613.6	8.4	642	35		613.1	8.4		-1.04302	-4.62842
20MP11b orange-50	536.771	2.00521		10.0038	0.315411	0.0615813	0.00170919	0.264758	623.8	8.4	614.2	9.2	659	30		613.3	9.2		-1.56301	-7.29404
20MP11b Clear-75	179.89	1.66585		9.99885	0.458179	0.0615937	0.0018291	0.320896	624	11	614	13	659	32		614	13		-1.62866	-7.32899
20MP11b orange-51	119.781	1.97579		9.97128	0.366303	0.0619585	0.00263742	0.389511	628	10	616	11	672	46		615	11		-1.94805	-9.09091
20MP11b Clear-22	331.133	1.58781		9.9345	0.46681	0.0615739	0.0019645	0.415587	627	10	618	14	658	34		617	14		-1.45631	-6.47249
20MP11b Clear-67	335.335	1.97629		9.91922	0.534676	0.0617642	0.00180302	0.602867	629	10	619	16	665	31		618	16		-1.61551	-7.43134
20MP11b orange-35	439.231	2.47516		9.92271	0.376011	0.0613386	0.0016905	0.25061	625.7	9.6	619	11	650	30		618	11		-1.08239	-5.00808
20MP11b Clear-15	408.783	2.04042		9.89187	0.499721	0.0598513	0.0020154	0.548175	615.8	9.9	621	15	597	36		621	15		0.837359	3.86473
20MP11b Clear-64	860.386	3.83792		9.849	0.436301	0.0621929	0.0018171	0.231527	636	11	623	13	680	31		622	13		-2.08668	-9.14928
20MP11b orange-15	441.076	1.9898		9.86327	0.467247	0.0611495	0.00190255	0.445707	627	10	623	14	644	33		622	14		-0.642055	-3.37079
20MP11b Clear-31	66.9643	1.37599		9.83419	0.421034	0.0613956	0.00244083	0.221797	630	12	624	13	652	43		624	13		-0.961538	-4.48718
20MP11b orange-46	395.647	1.78396		9.83972	0.425914	0.0609711	0.00160989	0.410645	626.8	9.4	624	13	637	28		624	13		-0.448718	-2.08333
20MP11b Clear-47	189.645	2.79461		9.80605	0.417719	0.0619125	0.00176741	0.305416	636	10	626	13	670	31		625	13		-1.59744	-7.02875
20MP11b Clear-82	353.265	2.01847		9.81254	0.353626	0.061462	0.00130587	-0.0509803	632	10	626	11	654	23		625	11		-0.958466	-4.47284
20MP11b Clear-80	161.47	0.663214		9.77275	0.467103	0.0637256	0.00165704	0.440061	651	10	628	14	732	28		626	14		-3.66242	-16.5605
20MP11b Clear-12	365.918	1.81805		9.7573	0.416063	0.0601987	0.00158981	0.583191	624.8	8.1	629	13	610	29		629	13		0.667727	3.02067
20MP11b Clear-44	386.595	1.75107		9.74246	0.43842	0.0614679	0.00173203	0.584977	635.3	8.6	630	14	655	30		629	13		-0.84127	-3.96825
20MP11b Clear-63	325.538	1.71475		9.75558	0.379791	0.0602756	0.00166182	0.259872	625.5	9.7	629	12	613	30		629	12		0.556439	2.54372
20MP11b orange-49	201.725	2.38627		9.7434	0.333228	0.0615487	0.0016924	0.389027	635.9	8.2	630	10	658	29		629	10		-0.936508	-4.44444
20MP11b Clear-76	308.695	1.36875		9.73174	0.437641	0.0610309	0.00155045	0.401725	632.5	9.8	631	14	639	27		630	14		-0.237718	-1.26783
20MP11b Clear-32	274.829	1.50547		9.70621	0.470555	0.0615895	0.0018303	0.360222	638	11	632	15	659	32		632	15		-0.949367	-4.27215
20MP11b Clear-69	218.822	2.00287		9.7107	0.412328	0.0606617	0.00175712	0.594187	630.6	8.1	632	13	626	31		632	13		0.221519	0.949367
20MP11b orange-18	522.461	2.06975		9.6831	0.479836	0.0628569	0.0022946	0.589779	648.9	9.8	634	15	702	39		632	15		-2.35016	-10.7256
20MP11b Clear-68	154.476	2.38758		9.70793	0.461186	0.0599517	0.00218817	0.186837	625	13	632	14	601	40		633	14		1.10759	4.90506
20MP11b orange-30	450.443	2.15014		9.68412	0.502191	0.0612321	0.0019137	0.576261	636	10	633	16	646	34		633	16		-0.473934	-2.05371
20MP11b orange-38	165.449	1.83448		9.69096	0.43664	0.0592556	0.00206823	0.510478	620.6	9.4	633	14	576	38		634	14		1.95893	9.00474
20MP11b orange-48	588.878	1.9435		9.6784	0.349483	0.0610973	0.00130268	0.281517	635.6	8.6	634	11	642	23		634	11		-0.252366	-1.26183
20MP11b Clear-49	133.634	2.35089		9.65994	0.385507	0.0606793	0.00200574	0.250475	633	11	635	12	627	36		635	12		0.314961	1.25984
20MP11b orange-13	298.12	1.95718		9.65562	0.452073	0.0613995	0.00194723	0.564439	639	9.2	635	14	652	34		635	14		-0.629921	-2.67717
20MP11b Clear-55	392.569	5.60246		9.61074	0.435853	0.0631422	0.00205266	0.399537	655	11	638	14	712	35		636	14		-2.66458	-11.5987
20MP11b orange-23	216.189	1.96019		9.62944	0.500842	0.0618874	0.00187584	0.676083	644.1	9.2	637	16	669	32		636	16		-1.1146	-5.02355
20MP11b Clear-8	414.691	1.69799		9.58743	0.431324	0.0612925	0.00181412	0.455915	641.6	9.8	640	14	649	32		639	14		-0.25	-1.40625
20MP11b orange-10	434.569	1.5343		9.57418	0.420909	0.0628173	0.0020521	0.488115	654	9.6	640	13	701	35		639	13		-2.1875	-9.53125
20MP11b Clear-13	78.1178	1.71507		9.56515	0.468498	0.0602081	0.00243495	0.47669	634	11	641	15	610	44		642	15		1.09204	4.83619
20MP11b Clear-26	191.312	1.07586		9.54853	0.3179	0.0608968	0.00176013	0.182818	640.4	9.5	642	10	635	31		642	10		0.249221	1.09034
20MP11b orange-55	575.821	2.13839		9.54144	0.363187	0.0613976	0.00153779	0.286545	644.7	9.3	643	12	652	27		642	12		-0.264386	-1.39969
20MP11b Clear-25	473.784	2.24632		9.50028	0.282621	0.0618569	0.00220338	0.61669	650.3	7	645.2	9.1	668	38		644.7	9.1		-0.790453	-3.53379
20MP11b Clear-20	296.188	1.54263		9.47317	0.342012	0.0620333	0.00186853	0.615933	653	7.1	647	11	674	32		646	11		-0.927357	-4.17311
20MP11b orange-58	150.993	2.06493		9.47723	0.311963	0.0619379	0.0019113	0.221945	652.1	9.6	647	10	671	33		646	10		-0.788253	-3.70943
20MP11b orange-42	115.768	2.04864		9.4728	0.368913	0.06169	0.00192361	0.291192	650	10	647	12	662	33		647	12		-0.463679	-2.31839
20MP11b orange-1	213.465	2.55234		9.45122	0.353291	0.0614403	0.00128494	0.386485	649.5	8.4	648	12	654	22		648	12		-0.231481	-0.925926
20MP11b Clear-23	377.04	2.32853		9.42057	0.339887	0.0616769	0.00187325	0.534711	653	7.8	650	11	662	33		650	11		-0.461538	-1.84615
20MP11b Clear-56	344.714	2.31496		9.41721	0.477192	0.0616683	0.00171241	0.439972	653	11	651	16	662	30		650	16		-0.30722	-1.68971
20MP11b orange-5	296.004	1.78772		9.392	0.379189	0.0612931	0.0016855	0.537795	651.4	8.3	652	13	649	30		652	13		0.0920245	0.460123
20MP11b orange-17	331.133	1.83465		9.38891	0.545655	0.0615008	0.00219232	0.679684	653	10	652	18	656	38		652	18		-0.153374	-0.613497
20MP11b orange-43	372.928	2.1865		9.40017	0.334339	0.0615883	0.00153454	0.439112	653.3	8	652	11	659	27		652	11		-0.199387	-1.07362
20MP11b Clear-53	204.256	1.46901		9.39423	0.418775	0.0602684	0.00126066	0.292052	643	10	652	14	612	23		653	14		1.38037	6.13497
20MP11b Clear-3	219.226	1.98548		9.34344	0.375981	0.0614274	0.00177492	0.289919	655	10	655	13	653	31		656	13		0	0.305344
20MP11b Clear-57	121.714	1.87898		9.3208	0.455548	0.0622526	0.00233119	0.551442	663	10	657	15	682	40		656	15		-0.913242	-3.80518
20MP11b Clear-5	285.151	1.87151		9.31788	0.477843	0.0599537	0.00135611	0.415114	645	11	657	16	601	24		658	16		1.82648	8.52359
20MP11b Clear-72	422.916	1.46931		9.31049	0.408519	0.0610912	0.00162119	0.351363	654	10	658	14	641	29		658	14		0.607903	2.58359
20MP11b orange-6	128.461	1.5612		9.31186	0.378835	0.0613724	0.00174282	0.340397	656.2	9.9	658	13	651	30		658	13		0.273556	1.06383
20MP11b orange-53	115.95	2.31284		9.22754	0.39116	0.0606397	0.00193105	0.182594	655	12	663	13	626	34		664	13		1.20664	5.58069
20MP11b Clear-18	339.657	1.77615		9.20219	0.392719	0.0615004	0.00199862	0.360609	663	11	665	13	656	35		665	13		0.300752	1.35338
20MP11b Clear-54	306.769	2.15775		9.19789	0.36723	0.0613936	0.00138718	0.106731	662	11	665	13	652	24		666	13		0.451128	1.95489
20MP11b orange-36	209.307	1.67214		9.18474	0.359969	0.0615067	0.00123198	0.502734	663.9	8.3	666	12	656	21		666	12		0.315315	1.5015
20MP11b Clear-62	162.871	2.9081		9.14522	0.348906	0.0603805	0.00180282	0.137643	657	11	669	12	616	32		670	12		1.79372	7.92227
20MP11b orange-47	316.186	1.93335		9.12831	0.282299	0.0614965	0.00206966	0.52357	666.8	7.7	670.1	9.8	656	36		670.5	9.8		0.492464	2.10416
20MP11b Clear-61	415.566	2.2335		9.11815	0.538854	0.0617573	0.00183606	0.352942	669	14	671	19	665	32		671	19		0.298063	0.894188
20MP11b Clear-52	188.404	1.64312		9.01345	0.541267	0.0614208	0.00190974	0.570375	672	12	678	19	653	33		679	19		0.884956	3.68732
20MP11b Clear-73	190.573	1.28206		8.56251	0.451123	0.0607685	0.00230616	0.421633	693	13	712	18	630	41		714	18		2.66854	11.5169
20MP11b orange-41	246.014	2.63659		6.26641	0.322989	0.112621	0.00563301	-0.207319	1265	29	954	23	1841	45		908	22		-32.5996	-92.9769
21MP13-27	819.463	2.89127		73.7041	2.42854	0.0457702	0.00366175	0.398651	83.38	2.94	86.88	1.42	0.00016	101.716		87.1	1.4		4.02855	99.9998
21MP13-2	1050.08	3.924		68.7499	2.22664	0.0486782	0.00433232	0.497435	94.54	3.53	93.09	1.5	131	105		93	1.5		-1.55763	-40.724
21MP13-10	1421.36	11.0364		66.4699	3.40958	0.0455467	0.0023163	0.10253	91.63	3	96.26	2.45	0.00016	58.8848		96.6	2.5		4.80989	99.9998
21MP13-28	2013.09	2.1736		55.0422	7.31474	0.0462602	0.00264945	-0.190387	111.28	8.14	116.07	7.64	10.1	68.9		116.4	7.7		4.12682	91.2984
21MP13-21	1905.07	4.4024		54.9311	3.15152	0.0468322	0.0022235	0.289856	112.8	3.36	116.3	3.31	39.6	56.8		116.5	3.3		3.00946	65.9501
21MP13-14	1532.39	2.97309		48.7971	1.64125	0.0492896	0.00206903	0.404597	132.34	2.6	130.77	2.18	160.6	49.1		130.7	2.2		-1.20058	-22.811
21MP13-31	793.213	2.06601		47.4535	1.79968	0.0490978	0.00307743	0.17437	135.35	4.27	134.44	2.52	151.5	73.4		134.4	2.5		-0.676882	-12.6897
21MP13-9	1599.15	1.62516		47.1344	1.53928	0.0488696	0.00270169	0.0729378	135.62	3.94	135.34	2.19	140.5	64.9		135.3	2.2		-0.206886	-3.81262
21MP13-24	1430.77	2.0955		47.0469	1.77127	0.0493748	0.00265146	0.241393	137.17	3.7	135.59	2.53	164.6	62.8		135.5	2.5		-1.16528	-21.3954
21MP13-30	1427.79	2.07913		46.5391	1.95393	0.050741	0.00377902	0.359018	142.14	4.72	137.05	2.85	228	86		136.7	2.8		-3.71397	-66.3626
21MP13-12	1967.7	1.50082		45.8096	1.56013	0.0502236	0.00270117	0.151702	142.88	3.94	139.21	2.35	204.3	62.4		139	2.3		-2.6363	-46.7567
21MP13-11	1825.55	1.62866		45.6321	1.21789	0.0513096	0.00241399	0.151349	146.29	3.44	139.74	1.84	253.7	54.1		139.3	1.8		-4.68728	-81.5515
21MP13-20	1244.47	1.23903		43.3666	1.16422	0.0479293	0.00175347	0.0947781	143.96	2.9	146.96	1.95	94.7	43.3		147.2	2		2.04137	35.5607
21MP13-26	1767.56	1.37109		43.0565	1.23206	0.0524151	0.00377216	0.54504	157.48	4.47	148.01	2.09	302.5	82		147.4	2.1		-6.39822	-104.378
21MP13-6	1215.65	1.60842		43.2456	1.1731	0.047794	0.00296731	0.366674	143.95	3.89	147.37	1.98	88	73.6		147.6	2		2.32069	40.2864
21MP13-15.2	1689.92	1.57623		42.459	1.12033	0.0484683	0.00245042	0.0998403	148.36	3.77	150.07	1.96	121.1	59.6		150.2	2		1.13947	19.3043
21MP13-7	1190.91	1.46865		41.1668	1.50292	0.050633	0.00310159	0.233288	158.99	4.68	154.72	2.79	223.1	70.8		154.4	2.8		-2.75982	-44.196
21MP13-15	2021.25	1.48269		40.8758	2.30395	0.0490931	0.00193577	0.0466856	155.53	4.85	155.81	4.34	151.2	46.2		155.8	4.3		0.179706	2.95873
21MP13-22	1758.71	1.40211		40.613	1.40539	0.0489025	0.0020285	0.0333142	155.9	3.84	156.81	2.68	142.1	48.7		156.9	2.7		0.58032	9.38078
21MP13-17	1318.11	1.48679		40.6017	1.83727	0.0482182	0.00295457	0.32289	153.91	4.52	156.85	3.51	108.9	72.4		157	3.5		1.8744	30.5706
21MP13-19	1515.1	1.27876		40.5757	1.13961	0.0475541	0.00174566	0.376059	152.03	2.6	156.95	2.18	76.1	43.6		157.3	2.2		3.13476	51.5132
21MP13-18	3113.07	0.575847		39.9366	2.04456	0.0477193	0.00194861	0.348493	154.79	3.82	159.43	4.03	84.3	48.4		159.7	4		2.91037	47.1241
21MP13-4	1652.44	1.29854		39.7545	1.03825	0.0497953	0.00224988	0.284282	161.7	3.39	160.15	2.07	184.4	52.6		160	2.1		-0.967843	-15.1421
21MP13-29	2742.64	1.50358		39.398	1.96161	0.0498453	0.00204102	0.226074	163.2	4.29	161.58	3.97	186.7	47.7		161.5	4		-1.0026	-15.5465
21MP13-13	1833.39	1.2413		39.413	1.09411	0.0487315	0.00223904	0.132772	159.77	3.73	161.52	2.21	133.9	54		161.6	2.2		1.08346	17.1
21MP13-25	1590.95	1.51319		39.0647	1.23389	0.0472881	0.00239131	0.443684	156.66	3.36	162.94	2.54	62.7	60.2		163.4	2.5		3.85418	61.5196
21MP13-23	2457.82	1.70889		38.3386	1.53538	0.0484226	0.00208887	0.129566	162.94	4.13	165.99	3.28	118.9	50.8		166.2	3.3		1.83746	28.3692
21MP13-8	2150.02	1.54189		37.1938	1.12602	0.0477864	0.00239625	-0.0479014	165.53	4.57	171.03	2.55	87.6	59.4		171.3	2.6		3.21581	48.7809
21MP13-16	2270.91	1.13315		35.0846	1.2997	0.0482724	0.00174656	0.178758	176.31	3.8	181.17	3.31	111.6	42.7		181.5	3.3		2.68256	38.4004
21MP13-3	1328.76	2.46284		20.4913	2.00624	0.0811153	0.00323719	-0.599795	442.1	22.6	307.2	14.7	1223.4	39.2		296	14		-43.9128	-298.242
21MP13-1	807.072	2.70074		8.08455	0.781883	0.0945741	0.00247479	-0.0831954	975	32	751.8	34.3	1518.8	24.7		725	33		-29.6887	-102.022
21MP13-5	846.015	4.25326		6.30649	0.24746	0.099437	0.00286991	0.181834	1172.5	15.4	948.8	17.3	1612.7	26.9		917	17		-23.5772	-69.9726
21MP15a-50	317.472	1.17839		43.5242	2.11159	0.0554766	0.00341541	-0.0808399	164.32	6.18	146.44	3.51	430.5	68.6		145.59	3.49		-12.2098	-193.977
21MP15a-52	969.098	1.8071		74.7819	2.42447	0.0496025	0.0031184	0.485917	88.82	2.34	85.63	1.38	175.4	73.3		85.43	1.38		-3.72533	-104.835
21MP15a-37	721.195	1.89693		76.2998	3.50684	0.0502793	0.00408003	-0.139773	88.27	4.17	83.94	1.92	206.9	94.1		83.67	1.91		-5.15845	-146.486
21MP15a-14	1138.04	1.57528		76.7864	4.00955	0.050348	0.00332358	0.218822	87.84	3.14	83.41	2.16	210	76.5		83.13	2.16		-5.31111	-151.768
21MP15a-26	804.997	1.75227		76.8898	2.35866	0.0440953	0.00240247	0.0841056	77.24	2.24	83.3	1.27	0.00018	63.6802		83.68	1.28		7.27491	99.9998
21MP15a-40	758.408	1.68016		76.9975	2.5537	0.050449	0.0037073	0.351889	87.78	2.91	83.18	1.37	214.7	85.1		82.9	1.37		-5.53018	-158.115
21MP15a-38	772.613	1.6893		78.0468	2.59979	0.0463829	0.00347194	-0.113176	79.93	3.28	82.07	1.36	16.5	89.9		82.17	1.36		2.60753	79.8952
21MP15a-45	1078.18	2.61607		78.936	5.90687	0.0494042	0.00362279	0.400269	84.01	3.27	81.15	3.02	166	85.7		80.98	3.01		-3.52434	-104.559
21MP15a-19	1111.98	1.01078		78.9911	3.77543	0.0463785	0.0038711	-0.0224114	79.01	3.69	81.1	1.93	16.3	100.3		81.19	1.93		2.57707	79.9014
21MP15a-25	994.53	1.57319		79.1642	5.06896	0.0512557	0.00495385	0.457257	86.79	3.67	80.92	2.57	251	111		80.55	2.56		-7.25408	-210.183
21MP15a-31	1040.51	1.49008		79.3302	3.60173	0.0447224	0.00282907	0.444275	75.98	2.17	80.75	1.82	0.00015	76.3307		81.05	1.83		5.90712	99.9998
21MP15a-10	969.727	1.74017		80.0651	2.77987	0.0482827	0.00289541	0.0391848	81.06	2.65	80.02	1.38	112.1	70.8		79.95	1.38		-1.29968	-40.09
21MP15a-28	149.802	3.06236		80.2889	3.4932	0.0487985	0.00616676	-0.0357336	81.68	5.3	79.79	1.73	137	148		79.71	1.72		-2.36872	-71.7007
21MP15a-51	723.643	2.61802		80.8049	3.30695	0.0460707	0.00365808	0.262637	76.81	2.93	79.29	1.61	0.24	95.69		79.44	1.62		3.12776	99.6973
21MP15a-18	919.99	2.02396		80.9399	4.35981	0.0494849	0.00405194	0.412032	82.14	3.05	79.16	2.12	169.8	95.6		78.97	2.11		-3.76453	-114.502
21MP15a-48	773.295	2.84699		81.0367	3.68466	0.0488048	0.00373109	0.192021	80.96	3.16	79.06	1.79	137.4	89.8		78.94	1.78		-2.40324	-73.7921
21MP15a-22	813.365	2.2931		81.0657	4.82429	0.0504178	0.00522438	0.39311	83.5	3.89	79.03	2.34	213	120		78.76	2.33		-5.65608	-169.518
21MP15a-43	1293.78	2.32919		81.0988	4.82564	0.0496056	0.00434441	0.135443	82.18	3.91	79	2.34	176	102		78.8	2.33		-4.02532	-122.785
21MP15a-47	1667.63	1.83706		81.2597	3.9199	0.0505696	0.00318665	0.193212	83.55	2.87	78.85	1.89	220.2	72.9		78.55	1.88		-5.96068	-179.264
21MP15a-39	802.511	2.75246		81.672	4.87098	0.0466771	0.00380767	-0.348319	76.98	4.32	78.45	2.33	31.7	97.7		78.54	2.33		1.8738	59.5921
21MP15a-16	799.391	1.84755		81.7561	2.93431	0.0492252	0.00324533	0.1401	80.94	2.74	78.37	1.4	157.5	77.1		78.21	1.4		-3.27932	-100.97
21MP15a-8	1464.39	1.43766		81.7991	3.83596	0.0486807	0.00285227	0.471701	80.04	2.12	78.33	1.83	131.4	68.9		78.22	1.82		-2.18307	-67.7518
21MP15a-15	1062.78	1.66044		81.9109	3.72059	0.0449755	0.00308476	0.487448	74.07	2.18	78.22	1.77	0.00016	76.6074		78.48	1.77		5.30555	99.9998
21MP15a-41	831.938	2.44223		82.0545	3.21881	0.0480782	0.00261671	0.359115	78.85	2.07	78.09	1.52	102.1	64.3		78.04	1.52		-0.973236	-30.7466
21MP15a-42	1088.26	2.41159		82.0917	6.40813	0.0507513	0.00469891	0.3098	83.02	4.02	78.05	3.03	229	107		77.74	3.02		-6.36771	-193.402
21MP15a-21	524.365	2.74945		82.7342	4.86661	0.0507496	0.00534939	0.443253	82.4	3.77	77.45	2.26	228	122		77.14	2.26		-6.39122	-194.383
21MP15a-11	931.15	1.11714		83.0602	3.7327	0.0522989	0.00491204	0.449899	84.5	3.4	77.15	1.72	297	107		76.69	1.71		-9.5269	-284.964
21MP15a-34	569.238	3.12139		83.4317	2.99011	0.0466015	0.00441255	0.0559304	75.3	3.61	76.81	1.37	27.8	113.5		76.9	1.37		1.96589	63.8068
21MP15a-9	892.435	2.26742		83.4807	2.76635	0.0487376	0.00355053	0.322754	78.58	2.63	76.76	1.26	134.2	85.6		76.65	1.26		-2.37103	-74.8306
21MP15a-3	842.24	2.01055		83.8698	2.50176	0.0479057	0.00303585	0.297643	76.94	2.28	76.41	1.13	93.5	75		76.37	1.13		-0.693626	-22.3662
21MP15a-36	486.929	3.21402		84.0158	3.89853	0.0539835	0.00613882	0.141655	86.16	4.81	76.28	1.76	369	128		75.66	1.75		-12.9523	-383.744
21MP15a-17	1133.19	1.88014		84.048	3.01652	0.0489713	0.00324962	0.532456	78.43	2.12	76.25	1.36	145.4	77.8		76.11	1.36		-2.85902	-90.6885
21MP15a-49	660.993	3.35052		84.1586	4.6658	0.0467882	0.00509183	0.218632	74.96	4	76.15	2.1	37.4	130.2		76.22	2.1		1.56271	50.8864
21MP15a-13	880.63	2.09716		84.2786	4.84453	0.0493428	0.0034722	0.29665	78.79	2.9	76.04	2.17	163.1	82.3		75.87	2.17		-3.61652	-114.492
21MP15a-27	654.157	1.37243		84.3177	3.27014	0.0465483	0.00279445	0.0662588	74.46	2.49	76	1.47	25	72		76.1	1.47		2.02632	67.1053
21MP15a-33	732.637	2.5767		84.3942	3.46251	0.0467506	0.00286712	-0.0345474	74.7	2.7	75.94	1.55	35.4	73.4		75.99	1.55		1.63287	53.3843
21MP15a-29	533.621	0.589266		84.4769	2.60022	0.0491413	0.0050608	0.0660256	78.31	3.98	75.86	1.16	154	121		75.71	1.16		-3.22963	-103.006
21MP15a-32	478.539	3.23126		84.5202	3.49969	0.0465134	0.00371307	0.208456	74.23	2.93	75.82	1.56	23.2	95.8		75.92	1.56		2.09707	69.4012
21MP15a-23	1180.21	2.21805		84.7614	3.99891	0.0473386	0.00348659	0.266705	75.29	2.76	75.61	1.77	65.3	87.7		75.63	1.77		0.423224	13.6358
21MP15a-46	919.886	1.66648		85.095	5.67327	0.0498918	0.00389494	0.548601	78.9	2.64	75.31	2.5	188.9	90.8		75.09	2.49		-4.76696	-150.83
21MP15a-20	1189.05	1.42427		85.2094	4.06258	0.0488085	0.00275863	0.00805169	77.15	2.74	75.21	1.78	137.6	66.4		75.09	1.78		-2.57944	-82.9544
21MP15a-4	702.876	0.863718		85.37	3.33406	0.0448536	0.00310231	0.367181	70.98	2.25	75.07	1.46	0.00016	85.5016		75.33	1.46		5.44825	99.9998
21MP15a-30	682.377	1.80646		86.0901	2.91289	0.0490474	0.0036113	0.472898	76.75	2.4	74.45	1.25	149	86.3		74.31	1.25		-3.08932	-100.134
21MP15a-12	1849.46	1.50817		86.4278	5.69832	0.0539903	0.0035687	-0.0122676	83.86	3.78	74.16	2.43	369.6	74.4		73.73	2.42		-13.0798	-398.382
21MP15a-1	680.772	1.45643		86.7039	2.72435	0.0503349	0.00335238	0.324127	78.15	2.4	73.92	1.15	209.4	77.2		73.66	1.15		-5.7224	-183.279
21MP15a-35	399.838	11.3039		86.7089	3.78108	0.0545333	0.00640013	0.228971	84.4	4.68	73.92	1.6	392	132		73.27	1.59		-14.1775	-430.303
21MP15a-5	594.415	2.35351		86.7549	2.78702	0.0499806	0.00445441	0.173841	77.58	3.34	73.88	1.18	193	104		73.65	1.18		-5.00812	-161.234
21MP15a-44	468.913	2.14036		87.0263	5.24304	0.0579505	0.00621506	0.137635	89.15	4.93	73.65	2.21	527	118		72.69	2.18		-21.0455	-615.547
21MP15a-24	1051.13	1.51076		87.0732	4.00473	0.0519524	0.00362566	0.287371	80.24	2.77	73.61	1.68	282.3	79.8		73.2	1.67		-9.00693	-283.508
21MP15a-7	556.303	2.70828		88.005	3.21674	0.04522	0.00255951	-0.247091	69.47	2.5	72.84	1.32	0.00018	67.5432		73.05	1.33		4.62658	99.9998
21MP15a-6	299.23	2.43873		88.8062	3.76386	0.0482952	0.00675628	0.00629684	73.39	5.17	72.18	1.52	113	165		72.11	1.52		-1.67636	-56.5531
21MP15a-2	404.634	4.91952		91.6511	3.47885	0.0457699	0.00511374	0.234673	67.58	3.57	69.96	1.32	0.00016	131.717		70.1	1.32		3.40194	99.9998
21MP15b-36	1333.32	6.49249		3.878	0.181658	0.0989754	0.00448402	0.392665	1531.1	20.1	1478.9	31	1604.1	42.2		1468.3	30.8		-3.52965	-8.46575
21MP15b-13	273.686	2.43827		8.15816	0.325787	0.0879449	0.00345664	-0.0225437	924.6	17.2	745.4	14.1	1380.4	37.8		724.4	13.7		-24.0408	-85.1892
21MP15b-28	381.381	2.44344		13.7044	1.76067	0.100931	0.00410273	-0.0142064	711.4	34.6	454	28.2	1640.5	37.7		436.2	27.1		-56.696	-261.344
21MP15b-31	898.024	1.44357		16.8506	0.777254	0.0865698	0.00557016	0.410241	543.6	13	371.64	8.33	1350.1	62.1		356.89	8.01		-46.2706	-263.282
21MP15b-30	1402.3	1.04967		53.3884	5.78139	0.0605748	0.00493834	-0.424875	147.5	11	119.63	6.42	623.2	87.9		117.81	6.32		-23.2968	-420.94
21MP15b-8	935.193	1.07424		73.5875	2.46895	0.0458549	0.00278918	0.0528234	83.66	2.73	87.01	1.45	0.00016	75.3408		87.22	1.45		3.85013	99.9998
21MP15b-24	1222.82	0.937214		73.6272	3.20323	0.0544287	0.00298073	-0.0366879	98.51	3.34	86.97	1.88	387.8	61.5		86.45	1.87		-13.2689	-345.901
21MP15b-17	769.237	1.51607		74.9671	3.50084	0.0492225	0.00351297	-0.111485	87.96	3.77	85.42	1.98	157.4	83.5		85.26	1.98		-2.97354	-84.266
21MP15b-34	1045.32	1.52716		75.4105	3.08022	0.0497234	0.00424276	0.288619	88.32	3.52	84.92	1.72	181	99.4		84.71	1.72		-4.00377	-113.142
21MP15b-9	1068.43	0.982832		75.8199	3.94484	0.050812	0.00351686	0.0759928	89.7	3.58	84.47	2.18	231.3	79.9		84.14	2.17		-6.19155	-173.825
21MP15b-22	1266.94	1.22881		76.3024	2.70536	0.0501275	0.00263553	0.175705	88.01	2.45	83.94	1.48	199.9	61		83.68	1.47		-4.8487	-138.146
21MP15b-5	1108.34	1.43264		76.4813	2.45194	0.0500816	0.00344064	0.417997	87.73	2.63	83.74	1.33	197.7	79.8		83.49	1.33		-4.76475	-136.088
21MP15b-41	1084.54	1.83274		76.6102	3.38133	0.0486449	0.00367798	0.441574	85.18	2.81	83.6	1.83	129.7	88.9		83.5	1.83		-1.88995	-55.1435
21MP15b-4	1919.2	1.35413		76.6373	2.79589	0.0477478	0.00282086	0.251322	83.64	2.45	83.57	1.51	85.7	70.1		83.57	1.51		-0.0837621	-2.54876
21MP15b-16	807.677	1.29863		77.3075	3.12738	0.0473993	0.00308701	0.274883	82.37	2.63	82.85	1.67	68.3	77.5		82.88	1.67		0.57936	17.5619
21MP15b-11	868.866	1.3856		77.4108	3.29061	0.0483144	0.0029764	0.310151	83.79	2.54	82.74	1.75	113.6	72.7		82.68	1.75		-1.26904	-37.2976
21MP15b-26	1638.29	1.23846		77.884	2.59308	0.0508569	0.00229614	0.15938	87.5	2.16	82.24	1.36	233.3	52.1		81.91	1.36		-6.39591	-183.682
21MP15b-10	981.482	1.1089		78.1233	3.82856	0.0625981	0.00539326	0.592946	106.36	3.5	81.99	2	693.6	91.8		80.46	1.96		-29.7231	-745.957
21MP15b-2	300.263	2.32946		78.3484	2.85914	0.045534	0.00383424	0.11183	78.24	3.31	81.76	1.48	0.00016	97.1049		81.98	1.49		4.30528	99.9998
21MP15b-29	1181.34	1.59383		78.8253	4.0123	0.046445	0.00262341	0.327325	79.28	2.38	81.27	2.06	19.7	67.8		81.39	2.06		2.44863	75.7598
21MP15b-19	1136.49	0.67967		79.0183	2.89221	0.0489472	0.00249564	0.284483	83.18	2.14	81.07	1.47	144.2	59.8		80.94	1.47		-2.60269	-77.871
21MP15b-15	872.911	1.50044		79.2186	2.80627	0.0481514	0.00321102	-0.222356	81.68	3.22	80.87	1.42	105.7	78.8		80.81	1.42		-1.00161	-30.7036
21MP15b-18	788.315	1.83758		79.9475	3.14597	0.047882	0.00472197	0.432856	80.53	3.44	80.13	1.57	92.4	116.8		80.11	1.57		-0.499189	-15.3126
21MP15b-43	970.781	1.6629		80.0884	3.73625	0.0479892	0.00293553	0.422874	80.57	2.29	79.99	1.85	97.7	72.4		79.96	1.85		-0.725091	-22.1403
21MP15b-1	646.843	1.03493		80.2638	2.40933	0.0471317	0.00383848	0.0509702	79.02	3.24	79.82	1.19	54.8	97.1		79.87	1.19		1.00226	31.3455
21MP15b-21	699.818	1.68777		80.3101	3.00505	0.0508109	0.00478618	0.443734	84.89	3.44	79.77	1.48	231	109		79.45	1.48		-6.41845	-189.583
21MP15b-20	2268.11	1.9022		80.599	3.12027	0.0486138	0.00210075	0.490967	81.08	1.62	79.49	1.53	128.2	50.8		79.39	1.53		-2.00025	-61.2781
21MP15b-7	736.228	1.8667		80.6459	3.03868	0.0462545	0.00299386	0.602854	77.25	1.92	79.44	1.49	9.82	77.86		79.58	1.49		2.7568	87.6385
21MP15b-37	760.272	2.21127		81.038	3.50096	0.0470961	0.00320629	0.263896	78.23	2.65	79.06	1.7	53	81.2		79.11	1.7		1.04984	32.9623
21MP15b-33	937.594	0.833089		81.5573	5.56554	0.0507857	0.004155	0.404019	83.6	3.32	78.56	2.66	230.1	94.5		78.25	2.65		-6.41548	-192.897
21MP15b-12	787.533	1.43319		81.5577	3.01593	0.0480471	0.00384519	0.0671107	79.26	3.27	78.56	1.44	100.5	94.6		78.52	1.44		-0.891039	-27.9277
21MP15b-27	2056.04	1.25019		81.6095	3.5033	0.0493309	0.00293134	0.527014	81.25	2.02	78.51	1.67	162.5	69.5		78.34	1.67		-3.49	-106.98
21MP15b-3	784.381	1.7123		81.6176	2.82008	0.0496085	0.00368544	0.324221	81.68	2.79	78.5	1.35	175.6	86.6		78.31	1.34		-4.05096	-123.694
21MP15b-23	1316.87	1.66354		81.7068	3.12459	0.0482021	0.00294814	0.373139	79.37	2.24	78.42	1.49	108.1	72.2		78.36	1.49		-1.21143	-37.8475
21MP15b-25	654.187	1.81844		81.8851	2.8668	0.049531	0.00420504	-0.0513479	81.3	3.65	78.25	1.36	172	99.1		78.11	1.36		-3.89776	-119.808
21MP15b-40	988.026	1.93936		82.9347	4.14827	0.0466553	0.00367507	0.198361	75.82	3.09	77.26	1.92	30.5	94.4		77.35	1.92		1.86384	60.5229
21MP15b-39	2437.22	2.73247		83.6797	3.85555	0.0498905	0.00304044	0.18346	80.18	2.67	76.58	1.75	188.8	70.9		76.36	1.75		-4.70097	-146.54
21MP15b-35	1623.5	1.37943		83.8159	3.68267	0.0498317	0.00259593	0.182097	79.97	2.37	76.46	1.67	186.1	60.6		76.24	1.67		-4.59064	-143.395
21MP15b-38	688.384	2.54458		85.3967	3.73778	0.0493143	0.00430848	0.162748	77.76	3.41	75.05	1.63	162	102		74.88	1.63		-3.61093	-115.856
21MP15b-42	1611.41	1.95557		86.1683	4.09156	0.0483646	0.00432862	0.35042	75.65	3.11	74.38	1.76	116	106		74.3	1.75		-1.70745	-55.9559
21MP15b-32	313.265	1.96832		87.603	2.95773	0.0492916	0.00802558	0.52451	75.84	5.4	73.17	1.23	161	190		73	1.23		-3.64904	-120.036
21MP15b-14	603.915	2.30583		88.3287	2.95308	0.0461967	0.00303523	0.179284	70.67	2.33	72.57	1.21	6.81	79.08		72.69	1.21		2.61816	90.616
21MP15b-6	429.285	2.52902		90.5392	4.14629	0.0476186	0.00472692	0.139679	71.05	3.55	70.81	1.61	79.3	117.9		70.79	1.61		-0.338935	-11.9898
21MP15b-44	372.095	7.11861		90.6058	3.72768	0.0454174	0.00570734	0.170845	67.83	4.11	70.76	1.45	0.00015	140.414		70.94	1.45		4.14076	99.9998
21MP16b-6	1116.73	35.9261		3.14094	0.110912	0.101048	0.00254642	0.308936	1718.7	15.1	1781.8	27.5	1642.6	23.4		1797.7	27.7		3.54136	7.81232
21MP16b-5	374.627	3.15849		3.38289	0.111191	0.107914	0.00347232	0.34687	1711.7	15.4	1669.5	24.2	1763.7	29.4		1659.4	24		-2.5277	-5.64241
21MP16b-4	71.3231	1.04308		3.42697	0.091878	0.106877	0.00477774	0.0189401	1693	21.3	1650.5	19.5	1746	40.9		1640.5	19.4		-2.57498	-5.78613
21MP16b-34	595.645	75.2019		3.9343	0.160633	0.101428	0.00410671	0.232644	1539.1	20	1460	26.7	1649.6	37.5		1443.9	26.4		-5.41781	-12.9863
21MP16b-43	171.787	2.13218		4.10018	0.283911	0.102035	0.00628918	0.236837	1511.2	31.9	1406.9	43.8	1660.6	57.1		1386.4	43.2		-7.41346	-18.0326
21MP16b-48	1623.88	9.6718		4.13549	0.301876	0.0996887	0.0054301	0.0888144	1486.3	34	1396.1	45.8	1617.4	50.7		1378.7	45.3		-6.46086	-15.8513
21MP16b-57	581.068	11.9207		6.08606	0.501128	0.0861394	0.00588857	0.362647	1098.7	28.8	980.7	37.5	1340.4	66		964.5	36.9		-12.0322	-36.6779
21MP16b-46	399.687	2.36093		7.08039	0.650452	0.0816227	0.00460835	0.34842	965.8	27.9	851.6	36.6	1235.6	55.4		837.6	36.1		-13.4101	-45.0916
21MP16b-35	288.559	1.7076		7.27135	0.354193	0.0852095	0.004745	0.450941	976.1	17.3	830.7	19	1319.4	54		812.8	18.6		-17.5033	-58.8299
21MP16b-10	474.581	5.22446		9.2467	0.50342	0.0900889	0.00220943	0.210269	864.4	15.9	662	17.1	1426.6	23.4		639.6	16.6		-30.574	-115.498
21MP16b-51	279.937	2.80448		9.74028	1.06115	0.0800414	0.00504894	-0.0326052	769	34.4	630	32.7	1197.1	62.2		619.4	32.2		-22.0635	-90.0159
21MP16b-49	720.19	13.0397		11.7971	0.810669	0.0850888	0.00537528	0.00969297	700.8	23.5	524.5	17.3	1316.7	61.2		507.4	16.8		-33.613	-151.039
21MP16b-38	560.312	6.11669		12.8655	0.786434	0.0787632	0.00421389	-0.157602	621.2	20.3	482.5	14.2	1165.3	53		469.8	13.8		-28.7461	-141.513
21MP16b-32	695.226	8.50764		12.976	0.931505	0.0785595	0.00330507	-0.38579	616	22.2	478.6	16.6	1160.2	41.7		465.9	16.1		-28.7087	-142.415
21MP16b-26	558.594	8.19551		13.868	0.494353	0.0778844	0.00347785	0.173237	582.1	11.5	448.85	7.73	1143	44.4		436.92	7.53		-29.687	-154.651
21MP16b-25	493.129	6.3941		18.6099	0.693297	0.0688922	0.00309047	-0.0347233	418.6	10.2	337.41	6.12	894.6	46.3		332.76	6.04		-24.0627	-165.137
21MP16b-2	217.112	273.411		21.7558	0.769355	0.0547256	0.00364998	0.167483	302.22	9.16	289.7	5.01	400	74.7		288.77	4.99		-4.32171	-38.0739
21MP16b-19	1192.89	10.2904		21.9658	0.597667	0.0550625	0.00234799	0.115005	301.31	6.24	286.99	3.82	413.8	47.7		285.93	3.8		-4.98972	-44.1862
21MP16b-54	912.414	14.4069		22.0786	1.6158	0.0510652	0.00339847	0.359763	280.95	9.73	285.6	10.2	242.7	76.7		285.9	10.2		1.62815	15.021
21MP16b-41	593.359	7.60548		22.3932	1.30106	0.0581053	0.00400809	0.376755	310.43	9.56	281.63	8.01	532.7	75.5		279.5	7.95		-10.2262	-89.1489
21MP16b-37	1130.82	9.27208		22.9101	1.0849	0.0520444	0.00256984	0.355623	276.56	6.65	275.41	6.38	286.3	56.4		275.33	6.38		-0.417559	-3.9541
21MP16b-65	723.778	17.9963		23.0554	1.71132	0.0538298	0.00378601	0.412519	283.27	9.69	273.71	9.95	362.9	79.3		273.01	9.92		-3.49275	-32.5856
21MP16b-8	817.383	8.25546		23.0717	0.682631	0.0527552	0.00276838	0.172612	278.15	6.77	273.52	3.96	317.3	59.7		273.19	3.96		-1.69275	-16.0061
21MP16b-15	863.345	15.5569		23.3873	0.707232	0.0514859	0.00243657	0.0617763	269.05	6.45	269.91	4	261.6	54.3		269.97	4		0.318625	3.0788
21MP16b-36	925.879	15.7973		23.3884	0.779643	0.049443	0.0020556	0.351124	259.62	4.95	269.89	4.41	167.8	48.6		270.63	4.42		3.80525	37.8265
21MP16b-62	1067.79	15.0794		23.5477	1.95427	0.0501163	0.00436532	0.692931	261.17	7.69	268.1	10.9	199	101		268.6	10.9		2.58486	25.774
21MP16b-60	572.074	12.9309		23.6136	2.09092	0.0516089	0.00369084	0.265277	267.3	11.5	267.4	11.6	267.1	82		267.4	11.6		0.0373972	0.112191
21MP16b-33	1004.33	7.06171		23.6466	0.998636	0.0530651	0.00258865	0.190179	273.62	6.97	267.01	5.52	330.6	55.3		266.53	5.51		-2.47556	-23.8156
21MP16b-47	1256.86	25.6863		23.7513	1.17112	0.0527535	0.00296689	0.644745	271.16	5.35	265.85	6.42	317.2	63.9		265.47	6.41		-1.99737	-19.3154
21MP16b-52	600.131	14.7829		23.8144	0.914482	0.0529531	0.00300799	0.221717	271.42	7.28	265.16	4.99	325.8	64.5		264.71	4.98		-2.36084	-22.8692
21MP16b-61	442.311	19.4505		23.8552	2.11642	0.0541734	0.00411064	0.448759	276.5	10.5	264.7	11.5	377.3	85.3		263.9	11.5		-4.45788	-42.5387
21MP16b-63	715.896	23.2057		23.8595	2.03757	0.0473309	0.00396072	0.546507	245.4	8.78	264.7	11.1	64.9	99.6		266	11.1		7.29127	75.4817
21MP16b-66	462.762	33.9809		23.9313	1.24917	0.0516407	0.00366662	0.498277	264.36	7.43	263.9	6.75	268.5	81.4		263.86	6.75		-0.174308	-1.74308
21MP16b-23	1273.58	22.8876		23.9715	1.17544	0.05297	0.00231928	0.579816	269.94	5.07	263.46	6.33	326.5	49.7		262.99	6.32		-2.45958	-23.9277
21MP16b-31	1411.16	10.4887		24.0112	0.933737	0.0524071	0.00251004	0.299784	267.03	6.09	263.03	5.01	302.2	54.6		262.75	5.01		-1.52074	-14.8918
21MP16b-16	727.963	9.69916		24.0696	0.685297	0.05073	0.00217344	0.208324	258.93	5.28	262.41	3.66	227.5	49.5		262.66	3.66		1.32617	13.3036
21MP16b-18	936.426	13.7001		24.1016	0.753268	0.0521114	0.00257204	0.368349	264.82	5.56	262.07	4.01	289.3	56.4		261.87	4.01		-1.04934	-10.3904
21MP16b-30	831.292	29.1926		24.3152	0.976922	0.049953	0.00228758	0.311743	253.14	5.67	259.81	5.12	191.8	53.3		260.29	5.12		2.56726	26.1768
21MP16b-12	785.418	9.28012		24.4601	0.688898	0.0508225	0.00280663	0.552128	255.69	5.21	258.3	3.57	231.7	63.8		258.49	3.57		1.01045	10.2981
21MP16b-64	1353.42	16.9411		24.58	1.81162	0.0507874	0.00433002	0.477484	254.43	9.21	257.07	9.29	230.2	98.5		257.26	9.29		1.02696	10.4524
21MP16b-7	193.258	95.0408		24.8004	1.04903	0.0522434	0.00345968	0.00038069	258.81	8.97	254.83	5.28	295.1	75.6		254.54	5.28		-1.56183	-15.8027
21MP16b-11	682.909	8.61378		24.9238	0.886321	0.053188	0.00324076	0.0794308	261.79	7.85	253.59	4.42	335.8	69		253	4.41		-3.23357	-32.4185
21MP16b-9	725.634	11.0318		25.0359	0.769467	0.0552265	0.00244446	-0.0220507	269.53	6.44	252.48	3.8	420.4	49.4		251.6	3.79		-6.75301	-66.5082
21MP16b-21	667.738	6.96481		25.0559	0.703465	0.0521961	0.00220005	0.142586	256.27	5.34	252.28	3.47	293	48.1		251.99	3.47		-1.58158	-16.1408
21MP16b-59	2639.23	17.2717		25.2517	1.91648	0.0519464	0.00373372	0.492696	253.44	8.36	250.36	9.32	282	82.2		250.14	9.31		-1.23023	-12.6378
21MP16b-55	413.179	960.789		25.3929	1.31107	0.0534667	0.00476415	0.411095	258.71	9.43	249	6.31	348	101		248.3	6.29		-3.8996	-39.759
21MP16b-14	527.962	23.4679		25.3958	1.02575	0.0523368	0.00299606	0.330336	253.84	6.53	248.97	4.93	299.1	65.3		248.62	4.93		-1.95606	-20.135
21MP16b-1	623.062	18.1355		25.5434	0.730488	0.0532768	0.00266086	0.366662	256.55	5.39	247.56	3.47	339.6	56.6		246.91	3.46		-3.63144	-37.1789
21MP16b-13	658.683	14.7907		25.61	0.890053	0.052603	0.00225892	0.394743	253.1	4.85	246.92	4.21	310.7	48.9		246.48	4.2		-2.50283	-25.8302
21MP16b-40	806.279	16.0331		25.7988	1.21745	0.0512397	0.00218171	0.320398	245.67	5.72	245.15	5.68	250.6	49		245.11	5.67		-0.212115	-2.22313
21MP16b-28	703.124	11.72		25.965	0.845218	0.0511221	0.00249965	0.338713	243.77	5.28	243.61	3.89	245.3	56.3		243.6	3.89		-0.0656787	-0.693732
21MP16b-45	585.435	25.8614		25.9823	1.5462	0.0507912	0.00355392	0.404749	242.22	7.67	243.45	7.11	230.3	80.8		243.54	7.11		0.505237	5.40152
21MP16b-39	513.184	71.3482		26.7517	1.13043	0.0529369	0.00293751	0.0802993	244.86	7.29	236.58	4.91	325.1	63		235.99	4.9		-3.49987	-37.4165
21MP16b-27	616.405	26.0014		26.7869	1.19473	0.0521988	0.00189647	0.343897	241.54	5.04	236.27	5.17	293.1	41.5		235.9	5.17		-2.2305	-24.053
21MP16b-3	804.041	4.06505		26.8618	0.860384	0.0558289	0.00314843	0.0455254	255.75	7.19	235.63	3.71	444.6	62.7		234.19	3.68		-8.53881	-88.6857
21MP16b-42	582.002	11.2817		27.7777	1.13253	0.0521182	0.00275433	0.432695	233.52	5.31	227.99	4.57	289.6	60.4		227.6	4.56		-2.42554	-27.0231
21MP16b-24	697.554	13.9294		27.9368	0.888145	0.0528988	0.00294397	0.131602	235.44	6.34	226.72	3.54	323.4	63.2		226.1	3.53		-3.84615	-42.6429
21MP16b-22	554.298	18.7823		28.2956	1.0894	0.0528541	0.00270284	0.353513	232.6	5.41	223.89	4.24	321.5	58.1		223.28	4.22		-3.8903	-43.5973
21MP16b-56	483.647	33.2059		29.3034	1.62211	0.0503255	0.00366398	0.367732	215.7	7.14	216.32	5.89	209	84.4		216.36	5.89		0.286612	3.38388
21MP16b-20	658.645	21.0882		30.4115	1.95669	0.0525655	0.00256278	0.147747	216.96	7.3	208.56	6.6	309.1	55.5		207.98	6.58		-4.02762	-48.2068
21MP16b-50	472.919	36.8536		31.4132	1.57174	0.0566805	0.00413585	0.244684	225.5	7.86	202.01	4.98	478.1	80.6		200.39	4.94		-11.6281	-136.671
21MP16b-17	322.992	22.6463		33.8734	2.81269	0.0504769	0.00290353	0.348213	189.66	7.17	187.55	7.67	216	66.6		187.41	7.67		-1.12503	-15.1693
21MP16b-53	612.468	43.9694		37.4075	1.92307	0.0503644	0.00390968	0.453718	172.83	5.65	170.07	4.31	210.8	90		169.88	4.31		-1.62286	-23.949
21MP16b-58	709.199	35.0979		38.1057	4.37682	0.052886	0.00447974	0.196323	177.7	10.5	166.99	9.47	322.9	96.2		166.27	9.43		-6.41356	-93.3649
21MP16b-44	761.746	17.6094		46.7412	4.7157	0.0530213	0.00368247	0.14829	147.49	7.8	136.46	6.81	328.7	78.8		135.74	6.78		-8.08295	-140.876
21MP16b-29	1355.01	30.8179		54.8746	6.11953	0.0477707	0.00246243	0.0270794	115.05	6.61	116.42	6.43	86.9	61.1		116.51	6.44		1.17677	25.3565
21MP17-14	1131.42	4.23537		95.1822	3.2988	0.045449	0.00489324	0.468916	64.71	3.02	67.37	1.16	0.00016	120.463		67.5	1.2		3.94834	99.9998
21MP17-13	1626.08	60.6755		89.4968	3.42638	0.0465594	0.0029045	0.219867	70.31	2.23	71.63	1.36	25.6	74.8		71.7	1.4		1.8428	64.2608
21MP17-17	632.554	4.08544		88.5876	3.11849	0.0467907	0.0060863	0.29908	71.35	4.28	72.36	1.27	37.5	155.7		72.4	1.3		1.3958	48.1758
21MP17-11	821.181	2.05209		86.6831	2.81753	0.0535408	0.00460973	0.229258	82.95	3.38	73.94	1.19	350.8	97.3		73.4	1.2		-12.1856	-374.439
21MP17-15	1350.75	1.39856		86.8971	2.52554	0.047386	0.00458102	0.144803	73.58	3.44	73.76	1.07	67.7	115		73.8	1.1		0.244035	8.21584
21MP17-10	103.22	1.2802		84.9095	5.77961	0.0607167	0.0170253	0.683533	95.4	10.9	75.48	2.55	628	302		74.2	2.5		-26.3911	-732.008
21MP17-53	735.384	1.49452		86.541	3.0692	0.0460378	0.00574025	0.0649152	71.84	4.42	74.06	1.31	0.00017	144.856		74.2	1.3		2.99757	99.9998
21MP17-21	1233.53	2.29988		85.6291	2.58672	0.0514409	0.00335893	0.233702	80.77	2.53	74.85	1.12	259.6	75		74.5	1.1		-7.90915	-246.827
21MP17-49	916.697	2.08352		86.1421	3.49372	0.0455905	0.00425982	0.0207456	71.49	3.49	74.4	1.5	0.00017	111.812		74.6	1.5		3.91129	99.9998
21MP17-12	167.683	1.18915		84.3795	3.91796	0.0599294	0.0105306	0.341956	94.82	7.5	75.95	1.75	600	190		74.8	1.7		-24.8453	-689.993
21MP17-23	679.777	2.37953		85.0838	4.01727	0.0518636	0.00582637	0.442632	81.91	3.96	75.32	1.77	278	129		74.9	1.8		-8.74934	-269.092
21MP17-18	868.282	2.15942		85.4639	2.96348	0.0450648	0.00408151	0.0736909	71.23	3.25	74.99	1.29	0.00016	103.131		75.2	1.3		5.014	99.9998
21MP17-19	1264.5	2.26074		83.4719	2.82578	0.0583734	0.0039481	0.114619	93.43	3.22	76.77	1.29	542.8	73.9		75.7	1.3		-21.7012	-607.047
21MP17-43	1208.67	2.24914		84.4368	3.1323	0.0433332	0.00383303	0.205475	69.39	2.97	75.9	1.4	0.00015	100.351		76.3	1.4		8.57708	99.9998
21MP17-16	529.659	1.93489		83.688	3.29773	0.0490999	0.00423377	0.224824	78.95	3.28	76.57	1.5	152	101		76.4	1.5		-3.10827	-98.5112
21MP17-7	738.66	2.68093		82.5592	2.82532	0.0535806	0.00525762	0.577136	86.98	3.47	77.61	1.32	352	111		77	1.3		-12.0732	-353.55
21MP17-39	808.918	2.56211		81.8084	3.42085	0.0481558	0.00553765	0.257478	79.2	4.26	78.32	1.63	106	136		78.3	1.6		-1.1236	-35.3422
21MP17-48	411.514	2.90647		81.8272	3.27778	0.0480718	0.00663036	0.231039	79.05	5.11	78.3	1.56	102	163		78.3	1.6		-0.957854	-30.2682
21MP17-45	222.285	2.10972		81.1262	4.52071	0.0528514	0.0103122	0.52801	87.3	7.21	78.98	2.19	321	222		78.5	2.2		-10.5343	-306.432
21MP17-54	486.312	1.19107		81.2221	3.49423	0.0518811	0.00667147	0.308902	85.67	5.03	78.88	1.69	279	147		78.5	1.7		-8.60801	-253.702
21MP17-1	743.587	2.25624		81.3223	2.1499	0.0490285	0.00472216	-0.0104816	81.05	3.9	78.79	1.04	148	113		78.7	1		-2.86838	-87.8411
21MP17-38	1009.88	2.13275		81.0287	3.29652	0.0511818	0.00382888	0.131837	84.75	3.26	79.07	1.6	248	86.1		78.7	1.6		-7.18351	-213.646
21MP17-6	710.424	0.828767		81.2924	3.24511	0.045901	0.00419696	0.127908	76.09	3.48	78.82	1.56	0.00017	107.025		79	1.6		3.46359	99.9998
21MP17-20	702.838	1.93227		80.917	2.80557	0.046141	0.00365	-0.095859	76.82	3.31	79.18	1.36	3.91	95.27		79.3	1.4		2.98055	95.0619
21MP17-22	477.987	4.47566		81.185	3.88682	0.0442256	0.00503942	0.341514	73.51	3.81	78.92	1.88	0.00018	125.989		79.3	1.9		6.85504	99.9998
21MP17-47	533.61	2.33309		80.3734	3.97038	0.0490957	0.00614931	0.268108	82.07	4.8	79.71	1.96	151	147		79.6	2		-2.96073	-89.4367
21MP17-8	113.777	1.2401		78.965	5.25569	0.0563733	0.0142428	0.255041	95.3	11.1	81.12	2.68	466	280		80.2	2.7		-17.4803	-474.458
21MP17-3	145.74	1.18216		79.3457	3.78803	0.0497281	0.0113254	0.255591	84.12	8.9	80.74	1.92	181	265		80.5	1.9		-4.18628	-124.176
21MP17-52	357.835	1.44391		79.6524	3.23738	0.0473534	0.00756066	-0.383637	79.96	6.89	80.43	1.62	66	190		80.5	1.6		0.584359	17.9411
21MP17-46	410.252	1.50951		79.1088	4.07013	0.0516254	0.00542247	0.442852	87.45	3.95	80.98	2.07	268	120		80.6	2.1		-7.98963	-230.946
21MP17-24	891.148	1.84386		79.2133	2.83023	0.0484151	0.00416353	0.0968163	82.12	3.54	80.87	1.44	119	101		80.8	1.4		-1.54569	-47.1497
21MP17-50	373.933	2.10213		79.9269	3.73303	0.0394455	0.00729271	0.216793	66.81	5.84	80.15	1.86	0.00018	194.579		81	1.9		16.6438	99.9998
21MP17-51	669.34	4.86676		78.7884	4.05459	0.0447935	0.00619336	0.176439	76.6	5.12	81.3	2.08	0.00016	174.388		81.6	2.1		5.78106	99.9998
21MP17-4	96.3586	1.41891		79.4086	4.65326	0.0368368	0.0113471	0.0106106	62.93	9.55	80.67	2.35	0.00017	289.08		81.8	2.4		21.9908	99.9998
21MP17-5	689.14	1.93052		77.6956	2.13973	0.0531828	0.00388235	0.0782483	91.54	3.33	82.44	1.13	335.6	82.7		81.9	1.1		-11.0383	-307.084
21MP17-36	443.544	0.929158		78.1962	3.28444	0.0441704	0.00313716	0.172704	76.12	2.79	81.92	1.71	0.00018	84.8555		82.3	1.7		7.08008	99.9998
21MP17-2	613.151	1.52988		77.0226	2.79869	0.0514214	0.00510103	0.0934551	89.37	4.38	83.16	1.5	259	114		82.8	1.5		-7.46753	-211.448
21MP17-30	698.482	1.97497		76.9853	3.35172	0.0484445	0.00324076	0.390562	84.45	2.59	83.2	1.8	120	78.8		83.1	1.8		-1.5024	-44.2308
21MP17-26	477.347	3.916		70.7335	3.85863	0.137757	0.0292079	-0.242064	241.4	24.9	90.5	2.45	2198	184		83.3	2.3		-166.74	-2328.73
21MP17-40	843.22	1.06735		77.1786	2.86954	0.0449755	0.00497805	0.452393	78.44	3.76	82.99	1.53	0.00016	123.625		83.3	1.5		5.48259	99.9998
21MP17-41	1774.62	1.1509		76.8994	2.39325	0.0459058	0.00342587	0.370664	80.28	2.68	83.29	1.29	0.00018	85.1659		83.5	1.3		3.61388	99.9998
21MP17-28	741.01	1.97188		76.5565	2.35709	0.0470018	0.00313747	0.249074	82.47	2.62	83.66	1.28	48.2	79.7		83.7	1.3		1.42242	42.3858
21MP17-27	520.341	1.91582		76.182	3.44227	0.0491503	0.00546681	0.162521	86.49	4.69	84.07	1.89	154	130		83.9	1.9		-2.87855	-83.1807
21MP17-44	462.116	1.94716		76.5339	3.62839	0.0453125	0.00463921	0.0984615	79.64	4.16	83.68	1.97	0.00014	119.988		83.9	2		4.82792	99.9998
21MP17-42	370.367	1.78944		75.715	4.51027	0.0472189	0.00930962	0.294927	83.72	7.57	84.58	2.5	59.2	235		84.6	2.5		1.01679	30.0071
21MP17-32	674.819	1.51023		75.3093	2.26896	0.0472377	0.00369924	-0.22252	84.19	3.63	85.04	1.27	60.2	93.3		85.1	1.3		0.99953	29.2098
21MP17-25	330.486	1.76159		74.5031	3.25507	0.0495486	0.00801612	0.180633	89.05	6.81	85.95	1.87	173	189		85.8	1.9		-3.60675	-101.28
21MP17-35	184.255	2.25809		71.656	3.06258	0.0724751	0.0113973	0.491613	132.5	8.77	89.34	1.9	998	160		86.6	1.8		-48.3098	-1017.08
21MP17-37	721.036	2.59366		73.2991	4.02158	0.0487879	0.00522522	0.374045	89.12	4.28	87.35	2.38	137	126		87.2	2.4		-2.02633	-56.8403
21MP17-29	290.567	1.84451		72.2855	2.39005	0.0403613	0.00778618	-0.0321006	75.28	7.14	88.57	1.45	0.00014	219.127		89.2	1.5		15.0051	99.9998
21MP17-31	513.164	2.82134		71.6615	2.89752	0.0458313	0.00476046	0.0921861	85.77	4.44	89.33	1.79	0.00015	126.944		89.6	1.8		3.98522	99.9998
21MP17-33	538.436	1.9944		70.0982	3.18269	0.042304	0.00512945	0.346852	81.12	4.44	91.31	2.06	0.00015	140.258		91.9	2.1		11.1598	99.9998
21MP17-9	749.029	1.38362		30.3917	1.10639	0.0539193	0.00354234	0.448694	222.11	5.9	208.7	3.74	366.7	74		207.8	3.7		-6.42549	-75.7068
21MP17-34	975.932	2.06702		25.7246	1.41976	0.0516245	0.00298504	0.31298	247.94	7.29	245.85	6.66	267.8	66.3		245.7	6.7		-0.850112	-8.92821
21MP18-22	794.645	2.2055		32.2054	1.35115	0.0559429	0.00366461	0.410811	217.93	6.04	197.12	4.07	449.1	72.8		195.7	4		-10.557	-127.831
21MP18-70	624.737	2.56192		31.7461	1.59163	0.0534736	0.00440601	0.297312	211.97	7.91	199.93	4.93	347.9	93.2		199.1	4.9		-6.02211	-74.0109
21MP18-12	327.413	2.83811		30.6847	1.1726	0.052206	0.00437035	0.127975	213.89	8.43	206.73	3.89	293.4	95.6		206.2	3.9		-3.46345	-41.9242
21MP18-29	478.669	8.96646		30.4556	1.07189	0.0505321	0.00323275	0.20858	209.1	6.26	208.26	3.61	218.5	74		208.2	3.6		-0.403342	-4.91693
21MP18-28	776.311	2.20889		30.3488	1.10346	0.0525085	0.00276765	0.101112	217.15	5.96	208.99	3.74	306.6	60		208.4	3.7		-3.90449	-46.7056
[truncated: 1,242 more rows]

## Sheet: Table 3 U-Pb SHRIMP-RG data
Supplementary Table 3. U-Pb SHRIMP isotopic analyses and ages
	Concentrations					Atomic Ratiosi						Age (Ma)
Grain	U	Th	Th/U	Pb*ii	f206iii	238U/206Pbiv	% err	207Pb/206Pbiv	% err	206Pb/238Uv	err abs	206Pb/238Uvi	err abs	Weighted Average age
	(ppm)	(ppm)		(ppm)	(%)		(1s)		(1s)		(1s)		(1s)	(2s)
Garnet granulite
SGM12-20-7.1	224.232	53.5095	0.238635	2.56609	-0.162797	75.0705	1.48721	0.046429	5.39238	0.0133425	0.000203272	85.4425	1.29312	Core age
SGM12-20-10.1	102.636	29.6494	0.28888	1.17955	0.697016	74.7528	1.86183	0.0532433	7.60204	0.0132842	0.000257123	85.0715	1.63579	86.15 ± 0.71 Ma
SGM12-20-15.1	200.244	43.5155	0.217312	2.25109	2.14359	76.4205	1.52346	0.064656	4.84238	0.012805	0.000202224	82.0223	1.28714	MSWD = 1.8
SGM12-20-16.1	460.512	6.88504	0.0149509	5.30242	-0.0366629	74.6122	0.887154	0.0474381	3.34645	0.0134075	0.000122195	85.8563	0.777299
SGM12-20-16.2	118.998	30.0924	0.252882	1.3552	-0.150808	75.4363	1.66726	0.0465157	6.34773	0.0132762	0.000227267	85.0208	1.44586
SGM12-20-17.1	845.771	45.6867	0.0540178	9.8375	0.252486	73.8604	0.670192	0.0497448	2.46365	0.0135049	9.30962e-05	86.4754	0.59214	Rim age
SGM12-20-22.1	534.848	8.32361	0.0155626	6.35109	0.14687	72.3479	0.833567	0.048945	3.08275	0.0138018	0.000118275	88.3637	0.752068	83.8 ± 1.5 Ma
SGM12-20-23.1	198.201	25.5551	0.128936	2.25477	-0.310344	75.5173	1.44268	0.0452508	5.60139	0.0132831	0.000196667	85.0646	1.25118	MSWD = 2.2
SGM12-20-24.1	201.808	21.0191	0.104154	2.13916	0.418038	81.0475	1.4287	0.0509012	5.18791	0.0122869	0.000180643	78.7236	1.15037
SGM12-20-27.1	250.817	56.9857	0.2272	2.80674	0.0900386	76.7712	1.24854	0.0483929	4.69976	0.013014	0.000167072	83.3523	1.06318
SGM12-20-27.2	470.251	8.88656	0.0188975	5.49267	-0.0150772	73.5512	0.896519	0.0476337	5.47519	0.013598	0.000130127	87.0678	0.827597
SGM12-20-33.1	864.155	46.5916	0.0539158	9.91528	0.0330648	74.8739	0.66567	0.0479841	2.50389	0.0133514	9.1345e-05	85.499	0.581089
SGM12-20-35.1	142.001	21.1759	0.149125	1.54297	-0.388374	79.0638	1.72307	0.0445574	6.74056	0.0126971	0.00022442	81.3357	1.42857
SGM12-20-35.2	906.471	19.7259	0.0217612	10.6023	0.134451	73.4511	0.648677	0.04882	2.41705	0.0135962	9.06885e-05	87.0562	0.576773
SGM12-20-37.1	217.776	139.962	0.642686	2.38379	2.50355	78.4848	1.39818	0.0674598	4.56118	0.0124223	0.000180956	79.5862	1.15221
SGM12-20-41.1	540.954	15.7712	0.0291545	6.26136	0.0999652	74.2224	0.85088	0.0485288	3.1838	0.0134595	0.000117747	86.1871	0.748966
SGM12-20-46.1	679.808	31.1423	0.0458105	7.75743	0.00340822	75.2856	0.777794	0.04774	2.92866	0.0132823	0.000106155	85.0596	0.675348
Biotite tonalite
SGM12-13-1.1	692.515	314.712	0.454448	7.90683	0.273393	75.2438	0.768245	0.0498784	2.82613	0.0132538	0.000104748	84.8783	0.666416	Core age
SGM12-13-3.1	353.882	147.269	0.416152	3.88324	0.440503	78.2904	1.04068	0.0511348	3.83323	0.0127167	0.000136331	81.4602	0.867813	85.77 ± 0.57 Ma
SGM12-13-7.1	454.415	189.137	0.416222	5.22357	-0.181701	74.7358	0.973205	0.046287	3.73273	0.0134048	0.00013396	85.8387	0.852139	MSWD = 1.5
SGM12-13-9.1	1290.4	234.403	0.181651	15.0096	0.104535	73.8585	0.584362	0.0485735	2.16541	0.0135252	8.12259e-05	86.605	0.516628
SGM12-13-9.2	46.7091	18.7206	0.400791	0.488541	-0.33366	82.138	3.10979	0.0449304	11.8734	0.0122153	0.000389361	78.2675	2.47969
SGM12-13-11.1	1382.85	368.07	0.266167	16.6265	0.0664561	71.4529	0.537159	0.0483305	1.97415	0.0139859	7.71624e-05	89.5345	0.49056	Rim age
SGM12-13-15.1	70.0081	28.9608	0.413677	0.696956	1.12086	86.2951	2.6359	0.0563671	9.32307	0.0114583	0.000312217	73.4447	1.98988	75.5 ± 5.3 Ma
SGM12-13-15.2	767.361	285.918	0.3726	8.85112	-0.0293156	74.4809	0.743337	0.0474993	2.783	0.0134302	0.000102529	86.0004	0.652186	MSWD = 4.3
SGM12-13-17.1	277.929	146.441	0.526902	3.21687	-0.333386	74.2239	1.25668	0.0450978	4.82508	0.0135177	0.000174226	86.5567	1.10815
SGM12-13-29.1	56.745	23.1911	0.408689	0.552013	-0.00544717	88.3125	2.82546	0.0474199	10.8448	0.011324	0.000328876	72.5892	2.09633
SGM12-13-29.2	656.72	276.187	0.420555	7.53088	0.335977	74.9166	0.789307	0.0503813	2.88939	0.0133033	0.000108055	85.1934	0.68742
SGM12-13-32.1	80.299	31.586	0.393355	0.868586	1.95225	79.4221	2.429	0.063077	8.27994	0.0123452	0.000311738	79.0948	1.98509
SGM12-13-32.2	380.89	102.478	0.269049	4.40554	0.205031	74.2752	1.07307	0.0493594	3.95378	0.0134358	0.000148252	86.0363	0.943023
SGM12-13-33.1	851.207	341.056	0.400674	9.79851	-0.211189	74.6309	0.708903	0.0460559	2.6852	0.0134276	9.76645e-05	85.9837	0.621244
SGM12-13-42.1	432.302	188.484	0.436001	4.89911	0.155652	75.8078	1.0176	0.0489336	3.79957	0.0131707	0.000137837	84.3497	0.877003
Granite dike
SGM12-12-1.1	273.295	30.9173	0.113128	9.43484	0.0728799	24.8852	0.885211	0.0518718	2.62678	0.0401553	0.000364496	253.795	2.25898	76.22 ± 0.52 Ma
SGM12-12-2.1	489.251	147.692	0.301874	18.0823	3.67928	23.2445	0.660739	0.0809526	1.56771	0.041438	0.000284358	261.74	1.76015	MSWD = 1.07
SGM12-12-6.1	1063.38	496.782	0.467172	11.3537	-0.263949	80.4631	0.675119	0.0455144	2.60603	0.0124609	8.63275e-05	79.8315	0.549654
SGM12-12-7.1	960.073	337.02	0.351036	10.2282	0.0078376	80.6393	0.716682	0.0476623	2.71276	0.0123999	9.13207e-05	79.4436	0.581481
SGM12-12-11.1	463.72	85.1045	0.183525	4.74051	-0.107266	84.0377	1.03043	0.0466873	3.96142	0.0119122	0.000126087	76.3371	0.803238
SGM12-12-12.1	752.077	333.211	0.443054	7.66068	-0.0119556	84.3411	0.801402	0.0474363	3.03881	0.011858	9.76301e-05	75.9922	0.621989
SGM12-12-25.1	171.122	211.774	1.23756	1.67714	-0.775511	87.6559	1.76559	0.0413362	7.27995	0.0114967	0.000207936	73.6898	1.3252
SGM12-12-29.1	732.446	11.42	0.0155915	26.6378	0.000845461	23.6223	0.573714	0.0515967	1.68651	0.0423326	0.000249005	267.275	1.54
SGM12-12-32.1	430.337	122.13	0.283802	4.43924	0.102951	83.2807	1.06133	0.048365	4.0216	0.0119952	0.000130924	76.866	0.833984
SGM12-12-41.1	460.52	227.833	0.494731	4.74182	0.0224174	83.4347	1.03605	0.0477247	3.93542	0.0119827	0.000127597	76.7865	0.812801
SGM12-12-46.1	65.5461	39.7903	0.607059	0.663724	-0.385896	84.8404	2.79354	0.0444677	12.9241	0.0118323	0.000342051	75.8283	2.17922
SGM12-12-49.1	275.85	220.245	0.798424	2.7885	0.843144	84.9856	1.39906	0.0541923	5.60678	0.0116675	0.000169667	74.7781	1.08113
SGM12-12-50.1	59.2749	68.7992	1.16068	0.758912	0.538274	67.1001	2.6781	0.0521835	9.48949	0.0148229	0.000408693	94.8532	2.59612
SGM12-12-59.1	871.58	83.0482	0.0952847	200.891	1.03634	3.72726	0.387417	0.103404	0.434602	0.265513	0.00112711	1517.99	5.74138
Granitic aplite dikelette
SGM12-19-2.1	234.598	146.235	0.623344	2.29093	-0.318705	87.9743	1.43753	0.0449463	5.61117	0.0114032	0.000168173	73.0937	1.07189	73.96 ± 0.72 Ma
SGM12-19-3.1	81.2313	30.9504	0.381016	0.883296	0.447091	79.0061	2.33858	0.0511721	8.85446	0.0126007	0.000304034	80.7215	1.93554	MSWD = 0.83
SGM12-19-4.1	388.799	110.727	0.284791	3.8888	0.249147	85.8921	1.15373	0.0494754	4.33061	0.0116135	0.00013789	74.4341	0.878692
SGM12-19-39.1	468.461	159.991	0.341526	4.65089	-0.167995	86.5328	1.02195	0.0461631	3.97607	0.0115757	0.000121511	74.1933	0.774348
SGM12-19-48.1	47.6761	23.4241	0.491319	0.467439	0.713748	87.6232	3.21696	0.0531228	11.4805	0.011331	0.000375621	72.6339	2.39428
Charnockite
GREC-6-1.1	105.504	77.9407	0.738746	1.4764	8.25411	61.3915	2.44973	0.113453	39.2146	0.0149444	0.000985962	95.625	6.26234	Population 1 age
GREC-6-2.1	60.764	72.5424	1.19384	0.70061	1.74945	74.5099	2.12179	0.0615802	7.40988	0.0131862	0.00029086	84.4484	1.8506	100.7 ± 6.7 Ma
GREC-6-3.1	134.581	75.4559	0.560674	1.80544	2.67859	64.039	1.46488	0.0692252	4.16937	0.0151972	0.000230328	97.2306	1.46256	MSWD = 5.6
GREC-6-4.1	19.0931	8.39764	0.439827	0.231069	3.08108	70.9868	3.53903	0.0722088	11.757	0.0136531	0.000507273	87.4181	3.22605
GREC-6-5.1	493.262	102.133	0.207056	5.82507	0.86688	72.748	1.05215	0.0546357	2.69556	0.0136269	0.000145951	87.2517	0.92821
GREC-6-6.1	158.275	29.1092	0.183916	2.31782	2.68522	58.6644	1.38827	0.0694679	6.65525	0.0165884	0.000251448	106.058	1.59449	Population 2 age
GREC-6-7.1	21.9917	11.4772	0.521887	0.310487	20.022	60.8498	3.06177	0.206539	6.38252	0.0131435	0.0004878	84.1764	3.10376	87.5 ± 2.7 Ma
GREC-6-8.1	218.433	76.6002	0.350681	2.64963	0.0314246	70.8234	1.43728	0.0480691	4.10906	0.0141152	0.000206367	90.3562	1.31181	MSWD = 2.8
GREC-6-9.1	197.04	26.3103	0.133528	2.71785	1.94947	62.2834	1.50918	0.0635097	6.42804	0.0157426	0.000252167	100.693	1.60038
GREC-6-10.1	795.957	261.951	0.329102	9.74849	0.205308	70.1449	1.00753	0.0494634	2.2176	0.0142269	0.000145023	91.0665	0.921762
GREC-6-11.1	352.191	169.284	0.480659	5.66358	0.229892	53.4233	1.06439	0.050236	2.75938	0.0186754	0.000202059	119.279	1.27867
Calc-silicate
12EC-6-1.1	160.705	71.4076	0.444339	1.9485	0.0530678	70.8555	1.45887	0.0482396	4.84632	0.0141057	0.000210422	90.296	1.3376	86.1 ± 2.5 Ma
12EC-6-2.1	66.8506	35.9351	0.537543	0.794985	1.75488	72.2421	2.37395	0.0616783	6.92472	0.0135994	0.000332062	87.0768	2.11189	MSWD = 1.6
12EC-6-3.1	28.2016	10.2342	0.362893	0.326212	0.600202	74.2707	3.02424	0.052488	11.4762	0.0133834	0.00041836	85.703	2.6613
12EC-6-4.1	201.647	99.0499	0.491205	2.10594	0.166442	82.2601	1.60165	0.0488865	4.76026	0.0121363	0.000198014	77.7648	1.26117
12EC-6-5.1	95.0736	24.1361	0.253868	1.06725	-0.475817	76.531	1.77472	0.0439184	6.94891	0.0131288	0.000238866	84.0828	1.51987
12EC-6-6.1	98.9684	23.6122	0.238583	1.14794	0.25699	74.0661	1.64903	0.0497756	5.93966	0.0134668	0.000228193	86.2329	1.45148
12EC-6-7.1	38.6515	16.1107	0.416819	0.494858	5.32222	67.1011	2.57063	0.0900577	7.23274	0.0141097	0.000383685	90.3214	2.43898
iErrors are reported at 1σ level and refer to last digits. Analyses in italics are not included in age calculations because of inheritance or open system behavior.
iiRadiogenic 206Pb.
iiiFraction of total 206Pb that is common 206Pb.
ivUncorrected ratios.
v207Pb corrected ratios using age-appropriate Pb isotopic composition of Stacey and Kramers (1975).
vi207Pb corrected age; spot analyses with strikethrough were excluded in age calculation due to open system behavior and/or analytical problems.

## Sheet: Table 4 Zircon TEs (SHRIMP-RG)
Table 4. Zircon trace-element concentrations (SHRIMP-RG)
Spot	Y	La	Ce	Nd	Sm	Eu	Gd	Dy	Er	Yb	Hf	Pb206	U	Th
	ppm	ppm	ppm	ppm	ppm	ppm	ppm	ppm	ppm	ppm	ppm	ppm	ppm	ppm
SGM12-12-1.1	248.917	0.00511347	5.67224	0.0348837	0.0785884	0.17108	2.29046	15.3899	51.0794	159.104	12175.3	10.2787	275.676	29.5707
SGM12-12-11.1	1090.98	0.0314558	2.89275	0.26466	1.29589	0.175401	17.0195	102.488	178.714	323.285	12224.3	5.12106	467.986	84.6899
SGM12-12-12.1	224.748	0.0156495	18.3824	0.220636	0.587926	0.289346	4.78889	17.0083	37.7469	105.244	12881.7	8.37525	758.099	332.491
SGM12-12-2.1	499.882	0.0398017	21.2874	0.2317	0.604911	0.39248	6.11927	31.9317	95.3453	279.181	11324.4	19.8734	498.393	147.964
SGM12-12-25.1	1466.64	0.121197	25.2797	1.42059	2.68817	2.3815	36.9899	154.013	255.985	389.819	8217.01	1.77424	171.976	211.449
SGM12-12-29.1	372.576	0.00298962	1.45918	0.032632	0.0995523	0.136873	2.04185	19.1729	73.5617	266.83	15318.5	29.3827	746.405	11.2002
SGM12-12-32.1	282.139	0.0154714	12.2681	0.147763	0.317038	0.295135	4.66579	20.9732	50.0381	147.472	12985.1	4.74503	431.507	120.645
SGM12-12-41.1	328.983	0.0260828	27.1298	0.320283	0.68815	0.436321	6.2696	27.6465	58.8968	137.592	12254.6	4.99031	463.382	226.801
SGM12-12-46.1	182.951	0.00804722	11.2264	0.234229	0.58403	0.370786	4.40162	17.3536	32.7296	67.3858	9536.82	0.71916	66.8539	40.3621
SGM12-12-49.1	901.167	0.0483537	39.8345	1.2205	2.49263	1.26387	21.8198	86.153	167.302	331.182	10503.8	3.24094	283.4	224.563
SGM12-12-50.1	625.227	0.0829522	24.5965	0.576846	1.16522	0.617257	11.6774	55.9357	120.224	241.564	10878.4	0.81746	58.5082	65.7677
SGM12-12-59.1	414.139	0.155922	3.76207	0.425474	0.484975	0.0735425	4.51945	31.1701	79.0306	183.826	13697.3	215.384	881.23	83.7308
SGM12-12-6.1	1544.91	0.0107068	44.3845	0.759625	2.50941	0.763559	28.8939	145.234	285.198	518.254	11958.3	12.1531	1084.71	507.996
SGM12-12-7.1	358.584	0.0461327	19.2499	0.348037	0.945346	0.432452	7.72647	29.3999	59.9325	143.834	13075.1	10.9426	971.708	337.603
SGM12-13-1.1	608.382	0.0143218	18.0563	0.625294	1.24729	0.550612	11.5387	53.1527	109.753	250.268	11704.7	8.615	700.839	316.444
SGM12-13-11.1	454.527	0.0944703	16.5002	0.376231	0.915615	0.310221	8.37937	37.4529	82.3946	203.266	12197.3	19.0172	1427.02	377.421
SGM12-13-15.1	153.287	0.00751377	8.77576	0.191365	0.327189	0.246975	3.06571	13.9371	27.1284	52.0657	10482.1	0.741721	70.335	29.2953
SGM12-13-15.2	402.384	0.0127056	16.8292	0.402181	0.865705	0.319935	8.13673	34.8567	73.3323	167.574	12186.7	9.81652	786.701	292.193
SGM12-13-17.1	531.056	0.0233646	19.9799	0.375456	1.22356	0.349709	11.6515	49.582	93.6976	174.58	10927.1	3.47896	283.919	149.089
SGM12-13-29.1	115.392	0.0138549	6.60694	0.0945168	0.248423	0.168744	2.3554	10.5871	20.2161	40.8491	10396.6	0.589163	57.3647	23.6234
SGM12-13-29.2	447.641	0.00960254	19.5135	0.353742	0.774798	0.317042	9.21999	38.2528	79.0314	184.675	11848.9	8.19056	662.517	277.607
SGM12-13-3.1	425.693	0.0220103	17.8343	0.306312	0.817497	0.257737	8.2972	39.5917	76.7372	151.116	10760.5	4.28503	368.141	153.599
SGM12-13-32.1	158.729	1.07384	11.5859	1.25495	0.632528	0.751972	4.44089	15.591	26.442	54.5728	9363.27	0.75947	78.038	31.3127
SGM12-13-32.2	213.387	0.0128138	8.1286	0.111891	0.256015	0.135381	3.65975	16.6637	39.1425	99.7981	12730.4	4.71758	387.168	104.015
SGM12-13-33.1	427.582	0.0225925	16.1039	0.397298	0.835903	0.302789	8.61684	37.705	76.3462	174.964	11642.1	10.6524	866.028	347.908
SGM12-13-42.1	523.587	0.0104241	21.3769	0.248893	0.974591	0.201911	10.656	48.1105	94.562	182.543	11777.4	5.29769	439.365	191.787
SGM12-13-7.1	506.517	0.0230759	20.0669	0.391805	0.919465	0.282179	9.5517	45.5434	89.8882	183.706	12147.6	5.76346	462.087	192.817
SGM12-13-9.1	653.623	0.397668	14.8574	0.53514	0.900014	0.381297	11.0408	53.3613	117.904	295.069	14471.1	17.3673	1330.76	239.84
SGM12-13-9.2	137.876	0.010262	8.30247	0.147013	0.387716	0.201029	2.63964	12.7125	23.2341	52.4404	11239.3	0.56791	47.419	19.0469
SGM12-19-2.1	358.354	0.01002	28.092	0.287094	0.872646	0.399195	7.9766	33.4452	65.4902	135.577	10599.5	2.44957	236.766	145.789
SGM12-19-3.1	866.502	0.0198292	12.3142	1.23775	2.77452	1.58871	23.3923	82.7451	148.024	246.916	7917	0.930451	81.8887	31.7329
SGM12-19-39.1	580.52	0.0157741	17.2155	0.193697	0.713822	0.416643	11.2164	52.5651	104.412	209.322	11718.4	5.2383	481.71	167.624
SGM12-19-4.1	1457.57	0.032126	7.24225	0.50407	1.8721	0.386561	23.4373	126.961	281.372	545.706	11455.5	4.09609	395.424	111.815
SGM12-19-48.1	241.031	0.0179486	9.93479	0.272876	0.643652	0.431187	5.98144	23.2595	40.5768	81.6614	10708.9	0.516941	48.282	23.8695
SGM12-20-10.1	66.168	0.014429	2.33963	0.719969	1.89022	0.116149	13.1639	13.4802	5.84368	3.20282	11022	1.26642	104.718	30.298
SGM12-20-15.1	130.348	0.577649	2.93064	0.91299	1.22327	0.317236	20.8498	25.8602	13.5035	12.0053	13434.1	2.68399	206.958	45.0836
SGM12-20-16.1	101.014	0.0126111	0.764138	0.298244	1.50209	0.218365	15.3619	22.387	7.78795	5.55804	13337.5	5.63154	468.13	7.18577
SGM12-20-16.2	69.512	0.0635863	2.18136	0.520537	1.69705	0.241994	11.1527	13.0295	7.9625	8.09645	11577.1	1.56785	124.866	31.7581
SGM12-20-17.1	346.868	0.011407	2.31191	1.29488	7.00666	0.952089	58.5619	73.1547	33.4394	28.1605	14788.3	10.84	867.18	46.6137
SGM12-20-22.1	215.726	0.0153386	0.812317	0.388659	2.40228	0.457231	30.3589	46.4726	16.2855	11.9483	13088	6.67264	545.251	8.34209
SGM12-20-23.1	105.931	0.00956004	1.51887	0.495656	1.76313	0.138881	13.0162	18.5992	12.7892	11.4637	12831.7	2.44375	201.086	25.9916
SGM12-20-24.1	207.879	0.0186761	1.45687	1.05748	3.46232	0.337085	27.2087	38.9174	22.47	21.5164	13199.4	2.41776	207.775	21.2994
SGM12-20-27.1	142.223	0.0177779	2.86903	1.33408	4.72456	0.406961	31.4587	29.8471	13.1457	12.8037	12084.7	3.01482	253.049	58.0693
SGM12-20-27.2	114.418	0.0134487	0.85339	0.244656	1.40091	0.290098	16.4419	24.8511	9.889	8.09041	13778	5.92034	476.991	9.00335
SGM12-20-33.1	303.651	0.0109221	2.06357	1.28753	6.48505	0.800074	59.638	68.9702	26.9453	20.1331	13093.6	10.3547	869.077	47.0575
SGM12-20-35.1	68.4659	0.013926	1.31223	0.367341	1.74194	0.145088	12.3933	13.4595	6.07997	5.24155	11744.7	1.64047	142.492	21.3249
SGM12-20-35.2	292.912	0.0296265	1.67337	1.94647	9.55602	1.6112	86.3543	82.6279	21.1301	10.9751	12817.9	11.5634	924.77	20.3857
SGM12-20-37.1	240.325	0.155089	6.21202	3.24014	9.1245	1.08383	54.9385	52.3592	23.4599	17.657	11580.7	2.61984	223.719	143.562
SGM12-20-41.1	205.471	0.0210395	1.36184	0.803768	3.34133	0.531021	33.9021	43.1574	19.2778	15.3642	13702.4	6.91411	550.086	16.0249
SGM12-20-46.1	239.607	0.0233066	1.91482	1.4564	7.43856	0.956233	64.3952	62.5191	18.4564	10.4368	12859.8	8.11174	682.494	31.446
SGM12-20-7.1	221.275	0.0163456	2.63203	1.18757	4.47999	0.379571	31.4976	40.4692	22.6591	22.2428	11465.7	2.60004	225.965	54.3824
12EC-6-1.1	324.507	0.0066173	23.1746	1.12831	1.55359	0.232898	9.56096	28.2638	57.4654	137.69	9215.86	2.27555	182.574	173.576
12EC-6-2.1	349.793	0.0596145	30.3537	1.76136	2.55625	0.232325	14.0827	37.5418	64.015	131.226	12268.6	1.08268	79.4944	103.055
12EC-6-3.1	352.314	0.037592	14.7607	1.02082	1.77259	0.292242	11.5238	37.9034	66.061	123.034	9396	0.440401	33.499	25.3161
12EC-6-4.1	831.016	0.27723	34.4932	5.78877	4.99648	1.05169	23.3857	77.1563	150.13	301.499	10567.8	3.37134	265.983	294.808
12EC-6-5.1	310.355	0.0383594	24.7923	0.387592	0.843588	0.135549	5.64769	23.566	51.4027	114.967	10600.1	1.67656	122.449	71.6537
12EC-6-6.1	437.082	0.0195555	22.6992	0.586606	1.02026	0.11425	8.70201	37.0299	76.9271	157.986	8816.3	1.72387	113.054	64.1566
GREC-6-1.1	955.15	0.0934655	188.602	1.05402	2.26842	0.161363	14.744	83.0045	178.136	358.681	9788.76	0.827148	70.6243	123.782
GREC-6-10.1	1169.91	0.0601436	211.638	1.05636	2.0257	0.29435	15.7358	83.4237	224.827	579.811	11614.8	13.7652	982.758	769.935
GREC-6-11.1	2485.19	0.280783	331.104	9.35589	11.1918	2.73218	71.1597	240.423	487.391	1021.19	10808.3	9.02134	451.363	629.535
GREC-6-2.1	956.404	0.072147	199.304	1.42381	2.13696	0.189677	17.3603	77.423	174.139	373.563	10265.1	0.964647	75.1362	211.576
GREC-6-3.1	940.22	0.214452	177.045	1.868	2.32219	0.460952	17.9564	77.9835	177.249	416.02	10407.3	2.72759	168.139	240.502
GREC-6-4.1	1034.45	1.68791	62.1786	1.81073	2.49382	0.100937	17.2776	80.9652	193.567	372.384	9844.44	0.32966	22.7336	23.9329
GREC-6-5.1	652.436	0.0624348	139.777	0.722856	0.817782	0.177479	9.4515	47.2858	125.462	342.493	11021.8	7.32795	594.803	317.894
GREC-6-6.1	555.796	0.627029	97.9006	0.989945	1.15171	0.112632	8.1453	40.7627	106.83	247.937	10049.6	2.64904	178.927	64.5977
GREC-6-7.1	1060.24	0.0788888	59.1503	1.07565	2.06739	0.083123	18.9116	89.1882	198.597	396.4	10133.7	0.489243	28.6503	36.4917
GREC-6-8.1	805.979	0.0884207	123.54	0.848322	1.44188	0.163435	12.1813	61.9326	146.302	334.756	9957.82	3.83363	286.15	238.273
GREC-6-9.1	703.491	0.135961	137.716	0.719087	1.53541	0.145092	11.2039	54.8844	124.212	284.19	10243.5	2.85222	215.056	81.3723
Secondary standard
R33-11.1	1900.75	0.0183288	8.78852	1.40042	4.03761	1.06276	40.7131	180.271	352.056	645.497	11073.6	11.5379	189.694	125.61
R33-13.1	2106.72	0.0132164	8.21372	1.83929	4.78013	1.33584	43.6321	196.073	387.858	700.738	10399.5	11.0192	181.483	124.142
R33-14.1	986.121	0.0100223	5.44398	0.417066	1.55957	0.472086	17.5348	90.6213	188.053	357.205	9355.2	4.5463	71.9555	32.9092
R33-17.1	3572.95	0.0576858	11.3619	3.86	7.90844	2.15079	85.4924	364.363	645.949	1023.13	9025.15	13.3653	220.371	182.922
R33-18.1	2082.66	0.0145482	7.78092	1.91877	4.55254	1.27874	44.9706	189.317	395.305	729.187	10484.9	12.733	206.878	134.515
R33-19.1	1569.39	0.0325149	7.42633	1.35624	3.69435	1.2596	36.8125	156.991	287.354	487.98	8532.01	5.14613	80.625	47.691
R33-20.1	958.484	0.00880762	6.31902	0.396561	1.08291	0.395483	14.0034	77.4496	186.265	414.426	10446.9	9.70406	160.063	60.2533
R33-21.1	1645.6	0.0130271	16.4612	1.03089	2.46372	0.71111	26.422	136.35	308.706	616.526	10435.9	18.2655	305.87	206.592
R33-22.1	1926.08	0.054472	7.5815	1.81937	4.24727	1.39849	48.5864	195.078	347.916	573.882	9455.71	5.88885	104.158	73.0015
R33-23.1	577.251	0.102255	5.13135	0.161837	0.728147	0.21967	8.87029	48.3107	110.836	228.18	10630.9	5.10192	86.8995	36.949
R33-24.1	932.455	0.0296753	5.91006	0.358612	1.26507	0.322858	14.1008	76.5641	181.454	388.964	10563.6	6.51593	106.563	43.1787
R33-25.1	892.065	0.0237058	6.13834	0.358722	1.12612	0.328251	13.0747	69.1646	174.968	393.839	10539.6	9.45782	158.273	63.9376
R33-9.1	1058.03	0.597268	5.7742	0.814903	1.97946	0.648096	21.2139	101.855	197.987	348.43	9066.89	3.77205	63.4421	33.5759

## Sheet: Table 5 Zircon TEs (LA-ICPMS)
Spot	texture	age	2SE	Sc	Ti	Y	La	Ce	Nd	Sm	Eu	Gd	Dy	Ybn	Hf	Pb	Th	U		Ti-in-zircon	Rim average
				ppm	ppm	ppm	ppm	ppm	ppm	ppm	ppm	ppm	ppm	ppm	ppm	ppm	ppm	ppm		temperature (C )	(1SD)
21CM25-34	luminescent rim	95.8	1.7	605.777	8.90191	536.384	0.0262687	2.11392	2.66854	5.10697	1.46652	19.9502	63.4801	164.458	6519.99	0.329669	37.1857	48.3994		762.548	788.546
21CM25-10	luminescent rim	83.1	4.3	767.062	16.9486	495.257	174.772	427.613	366.277	64.5099	2.74987	69.1599	72.8008	174.824	7271.93	0.631991	24.8205	55.3908		825.149	21.8684
21CM25-4.c	luminescent rim	94.1	1.9	655.292	8.28299	281.699	0.0234226	2.00572	1.05323	1.50863	0.213091	7.52689	32.4905	128.235	7495.91	0.285199	29.3733	39.5697		755.984
21CM25-51	luminescent rim	92.5	1.6	546.177	8.16976	209.178	0.0308087	1.18118	0.582291	0.935889	0.252115	4.65777	21.7651	92.4171	5863.92	0.126645	12.4877	25.9873		754.739
21CM25-7	luminescent rim	90.6	1.8	690.402	11.0711	590.46	5.73327	15.0584	15.347	8.7629	2.43162	26.9959	76.8374	191.714	5592	0.28379	28.8059	51.3191		782.934
21CM25-26.c	luminescent rim	91.4	2.2	584.717	6.92624	290.776	0.0702644	2.43332	1.11045	1.30236	0.112032	6.09223	29.7259	127.674	7603.6	0.344919	39.926	49.0434		740.042
21CM25-38	luminescent rim	91	2.1	694.817	11.7737	945.5	0.0595916	3.2237	5.82925	12.0943	4.14171	39.8041	111.067	254.38	5720.2	0.428332	48.2688	74.1906		788.832
21CM25-27	luminescent rim	90.5	2.9	592.158	10.4239	266.865	0.0228296	1.12718	0.963723	1.77779	0.602425	7.39025	26.7655	91.557	5691.5	0.117814	10.9646	29.1231		777.223
21CM25-54.r	luminescent rim	88.3	2.6	611.649	10.277	246.295	0.0371143	2.10439	1.06434	1.37064	0.205504	6.33115	26.8767	103.919	6702.91	0.1691	16.4307	21.5397		775.887
21CM25-52	luminescent rim	89.1	1.9	548.254	9.28989	472.019	0.100034	1.89705	1.80591	3.11934	1.10711	14.7098	49.4853	161.726	4691.65	0.245483	25.596	47.9973		766.474
21CM25-2.c	luminescent rim	88.7	2.2	652.207	8.87698	246.125	0.0305674	1.88047	0.943862	1.25798	0.166982	6.08316	26.2004	123.867	7638.23	0.201824	22.0113	30.8895		762.291
21CM25-36	luminescent rim	89	1.7	656.538	10.728	453.388	0.04657	1.50284	1.98499	4.12297	1.41614	15.0688	49.007	151.917	5424.25	0.1551	15.7087	35.8634		779.942
21CM25-3	luminescent rim	87.7	2.3	643.115	8.78531	281.544	0.0178985	1.07232	1.02585	2.21125	0.768021	9.05027	30.089	111.55	5442.28	0.0778069	8.85952	26.8788		761.341
21CM25-45	luminescent rim	87.5	2.5	591.236	9.77467	449.271	0.0231113	2.16142	1.31309	2.32794	0.714007	13.2031	50.8938	159.563	6329.04	0.259633	28.3198	48.9643		771.194
21CM25-43	luminescent rim	86.7	2.6	636.449	11.3178	461.171	0.030258	1.69629	1.65764	3.44273	1.20052	16.0791	51.4029	135.482	5929.05	0.224107	25.9276	48.5188		785.039
21CM25-19	luminescent rim	86.7	1.9	607.488	9.95789	643.678	0.0396281	2.2643	3.14727	6.89983	2.28959	27.096	73.0326	186.121	6176.81	0.356998	42.1045	62.6466		772.928
21CM25-24	luminescent rim	86.9	1.6	594.944	11.6831	939.744	0.06995	3.1727	5.60911	12.3344	4.22087	42.0604	112.476	280.318	4935.98	0.44634	54.0701	83.3292		788.088
21CM25-1	luminescent rim	86.4	2	619.468	9.09639	333.509	0.0299385	1.79658	1.07481	1.57166	0.301456	7.7979	35.4405	138.949	7022.92	0.228269	27.0373	42.6705		764.533
21CM25-12.r	luminescent rim	86.2	2.3	734.22	13.9906	639.964	0.0363384	2.11221	2.22724	4.97269	1.74764	26.988	73.3457	210.781	7191.63	0.367806	40.4965	70.0976		805.726
21CM25-14.c	luminescent rim	85.9	2.2	759.677	18.0291	834.111	0.27593	2.68403	2.26852	4.11143	1.48468	23.7676	92.5479	260.526	6663.41	0.367056	39.5018	96.0478		831.558
21CM25-54.c	luminescent rim	85.6	1.6	634.34	11.5542	869.366	0.0480178	2.42006	4.15868	10.0072	3.37352	35.712	102.977	249.286	5258.64	0.357175	40.7206	72.2441		787.021
21CM25-17.c	luminescent rim	85	1.6	703.404	15.1982	1019.76	0.0546264	3.80724	4.4893	9.09706	3.07248	36.6079	115.676	288.557	5683.01	0.478929	54.5714	92.6439		814.025
21CM25-11	luminescent rim	85.1	1.4	796.966	15.8347	1057.47	0.131655	3.94698	7.34852	15.699	4.97774	60.396	150.137	310.172	6504.04	0.574509	61.068	102.565		818.185
21CM25-35	luminescent rim	84.8	2.5	629.856	13.1092	547.578	0.0218463	1.6219	1.47786	2.62611	1.10436	13.368	55.3779	181.664	5167.98	0.160414	18.6425	50.5538		799.291
21CM25-21	luminescent rim	85.4	1.7	655.939	16.4759	944.554	0.029368	2.88682	2.11533	3.89272	1.40606	20.986	99.4288	282.025	5583.41	0.374826	46.7231	97.49		822.241
21CM25-31	luminescent rim	84.4	1.4	624.71	15.2154	836.045	0.0784353	2.8467	2.34013	3.7215	1.54611	20.0265	83.5884	217.551	5308.71	0.326857	37.4867	81.6112		814.139
21CM25-25	luminescent rim	85	1.9	589.361	13.109	509.839	0.0227317	1.44955	1.35431	2.74212	0.938451	12.8972	49.8145	159.916	5112.07	0.156831	17.4577	45.0858		799.289
21CM25-8	luminescent rim	84.5	1.8	716.878	12.5937	538.64	0.035363	1.80509	1.70341	3.223	1.20582	17.7585	62.6233	203.212	5662.77	0.198065	23.3927	54.7168		795.362
21CM25-29.r	luminescent rim	84.7	2.8	618.401	12.6875	487.438	0.046113	1.55875	1.21891	2.25162	0.729336	11.4269	50.0188	140.542	5949.46	0.193916	22.1946	54.05		796.086
21CM25-32	luminescent rim	84.8	2.9	604.669	14.0673	626.301	0.0248473	1.78306	1.64755	2.99506	1.18597	15.1118	67.3783	184.003	5343.55	0.214747	25.4434	64.8632		806.269
21CM25-12.c	luminescent rim	83.7	1.8	773.186	12.7654	1109.23	0.0664222	3.46117	6.60476	15.4933	5.32095	59.5301	147.196	316.97	6643.62	0.568133	68.0471	103.39		796.684
21CM25-14.r	luminescent rim	83.4	2.1	732.002	14.9588	557.735	0.0351602	1.69467	1.73401	3.15418	0.983587	14.2336	58.9046	180.844	6536.33	0.195581	21.3991	70.0783		812.423
21CM25-42	luminescent rim	83.6	1.9	648.63	10.7044	575.628	0.0331932	1.76081	2.11842	4.57735	1.52669	18.9535	63.4679	169.053	6087.33	0.224125	24.276	57.462		779.732
21CM25-46	luminescent rim	82.9	1.9	562.186	9.89539	702.591	0.0306454	2.03569	2.44542	5.37843	1.87469	26.9518	81.7486	191.987	4993.58	0.345745	38.8605	62.8511		772.339
21CM25-33	luminescent rim	82.8	1.8	629.227	12.5387	522.455	0.545567	2.7436	2.03943	2.3412	0.926445	11.8836	52.5998	166.226	5986	0.217017	23.3628	55.0226		794.935
21CM25-30	luminescent rim	82.5	1.6	643.524	15.2643	1066.47	0.0332556	3.12667	3.00156	6.20138	2.33942	31.3998	120.413	284.336	5259.9	0.478969	59.5115	107.738		814.464
21CM25-15	luminescent rim	81.6	1.8	752.778	13.1326	1015.54	0.0518503	3.08356	4.05596	8.9286	3.224	43.9299	124.094	300.207	7061.14	0.561221	67.8026	104.785		799.466
21CM25-56	luminescent rim	81.6	2.6	666.817	11.4075	884.723	0.0424511	3.17258	4.50534	9.75561	3.56895	37.1896	105.192	242.581	5116.02	0.413495	51.6071	71.9475		785.795
21CM25-48	luminescent rim	81.2	1.8	625.334	9.87972	962.451	0.0747621	3.11502	5.52909	13.1988	4.40128	45.4065	124.81	263.7	4945.92	0.490271	59.8035	84.7362		772.192
21CM25-13	luminescent rim	77.3	1.7	793.638	14.523	968.978	0.0606028	3.75474	7.19002	13.3952	4.15927	49.5089	118.61	291.038	6443.96	0.468459	57.5369	93.3007		809.454
21CM32-4	luminescent rim	78.6	2	627.441	10.0614	352.901	0.0224337	3.18228	1.50674	1.73817	0.137564	8.14817	34.239	148.756	6352.43	0.377033	47.1325	50.0445		773.896	773.896
21CM37-1	core/interior	84.4	1.7	622.809	10.2299	511.238	2.51645	16.5302	8.41937	2.78826	0.509922	11.0639	51.3663	235.127	7049.58	0.739233	80.0325	175.191		775.454	742.275
21CM37-4.2	luminescent rim	73.3	2.5	544.303	7.10443	344.516	0.547313	11.6428	4.29366	1.44853	0.288148	6.15873	34.8411	171.045	6455.75	0.634542	75.9853	197.287		742.275
21CM44a-4	luminescent rim	90.6	3.1	573.226	9.70533	367.136	0.0283516	13.1201	4.70666	1.33849	0.243421	6.62043	33.9863	202.969	8115.8	0.854457	90.7301	218.198		770.531	789.401
21CM44a-5	luminescent rim	86	1.8	597.403	13.494	444.324	0.119409	14.1033	4.82535	1.76352	0.406551	9.59084	40.6513	188.38	7744.73	0.578133	72.1411	122.368		802.142	13.7193
21CM44a-8	luminescent rim	87.6	1.8	581.828	12.6985	323.778	4.32982	18.5722	9.6959	2.46607	0.356147	7.92316	32.1598	174.528	6940.43	0.510593	56.704	132.162		796.171
21CM44a-9	luminescent rim	87.1	1.3	583.581	11.7651	544.647	1.92473	19.1872	7.70409	3.08036	0.55239	13.0855	54.8457	264.275	7135.2	0.882005	95.8855	192.901		788.761
21CM49a-3	luminescent rim	73	1.4	645.651	5.16464	426.423	0.0273189	6.83777	2.98971	2.30775	0.872925	9.48191	42.5312	211.143	7160.88	0.461331	59.3745	154.414		715	705.75
21CM49a-7	luminescent rim	76.1	1.7	654.719	3.89006	318.142	0.0191002	7.35856	2.47945	1.2473	0.404654	7.18219	29.4844	167.832	7399.58	0.505166	60.7279	231.893		692	23.3577
21CM49a-11	luminescent rim	75.2	1.1	719.508	3.44509	384.135	15.2625	51.7507	35.5544	8.59019	0.592388	11.3594	34.0902	234.542	10582.4	1.73255	203.42	1085.49		682
21CM49a-19	luminescent rim	77.3	1.8	655.788	6.43499	717.028	23.7788	69.4811	46.5707	10.7013	1.18216	22.1154	68.7517	309.094	8545.22	2.31256	279.06	787.182		734
21CM49b-7	luminescent rim	72.7	1.5	636.445	18.9617	618.86	5.17929	62.7327	34.317	6.30452	14.6603	14.2354	58.0955	326.577	8404.16	2.35733	248.483	1122.05		837		omitted in rim calculation
21CM49a-6	core/interior	84.5	2.5	740.423	7.19353	575.709	0.0201275	2.61864	1.07423	1.71546	0.102848	10.3397	57.1218	273.715	8739.61	0.680293	78.218	336.499		743
21CM50a-1	luminescent rim	78.2	1.7	642.228	10.4642	294.731	0.0208168	1.38047	0.807928	1.32444	0.162313	6.51319	30.6408	151.167	6336.33	0.119254	13.9597	27.87		777.587	777.587
21CM50a-4	luminescent rim	77.5	1.7	671.109	9.57597	323.163	0.0230756	1.68526	0.912457	1.33639	0.163255	7.27861	31.7507	164.042	7155.32	0.204995	22.5765	71.0145		769.283	n.d.
21CM50a-12	core/interior	82.4	1.6	641.383	12.4842	316.541	0.0186264	1.35347	0.735055	1.43063	0.183268	7.44367	33.883	148.72	6055.58	0.127348	14.0663	27.1098		794.51
21CM50a-8	core/interior	75.9	2.4	616.347	10.1529	346.703	0.021246	1.60312	0.838997	1.30655	0.156042	7.5543	34.4103	155.551	6679.03	0.15973	19.3648	30.9923		774.745
21CM50a-15	core/interior	75	1.7	646.884	11.0317	301.612	0.0215803	1.56051	0.8038	1.49865	0.19435	7.05612	33.6594	161.476	6733.88	0.118936	13.6685	31.0917		782.594
21CM50b-7	luminescent rim	380	29	642.463	8.73442	702.266	0.0703187	4.35628	1.77427	1.81168	0.209226	9.25138	63.23	331.066	7505.86	4.91444	72.76	436.124		760.81	777.898
21CM50b-5	luminescent rim	78.8	2.7	666.66	13.2166	360.845	0.0217871	1.34148	0.895915	1.83871	0.252152	8.4233	38.5183	170.24	6566.26	0.114545	12.2827	22.17		800.094	20.4723
21CM50b-6	luminescent rim	77.3	1.7	663.949	9.51631	367.232	0.0215607	1.50466	0.85289	1.42253	0.19358	7.64893	37.8672	189.596	6970.94	0.246044	26.1652	61.3952		768.703
21CM50b-8	luminescent rim	75.6	2.5	683.833	13.1945	335.534	0.0226437	1.44791	0.913926	1.72218	0.255944	8.03609	36.8672	178.379	6766.51	0.139889	13.9435	31.5719		799.928
21CM50b-3	luminescent rim	73.2	2	621.883	8.65314	264.025	0.0183419	1.52812	0.733629	1.09516	0.124049	5.50318	29.9454	131.368	6762.9	0.237331	28.7311	148.975		759.956
NIST612 (Primary Standard)
NIST612-1		n.a.	n.a.	43.1096	47.3812	39.0218	36.0678	40.3885	38.9444	39.8462	38.621	37.4003	37.396	42.3932	40.8382	41.9852	40.8713	41.4638
NIST612-2		n.a.	n.a.	38.3793	43.4893	39.022	35.932	37.8634	34.5181	35.9045	34.3779	37.1716	34.1939	36.7437	36.8156	37.7392	36.5826	36.4188
NIST612-3		n.a.	n.a.	39.4906	42.4489	37.4091	35.9712	36.3225	34.6312	36.5102	34.6041	37.2939	34.7807	38.575	35.3959	37.7566	37.106	36.3555
NIST612-4		n.a.	n.a.	45.2222	45.8452	41.6159	36.6341	43.29	38.342	43.2692	41.1115	36.8578	37.8344	45.4243	41.3227	42.6468	42.6925	42.2014
NIST612-5		n.a.	n.a.	37.4383	41.9365	37.0789	35.2953	36.1727	33.8779	35.9787	33.5711	36.7126	33.7025	37.0818	35.4217	36.3886	36.1569	35.3492
NIST612-6		n.a.	n.a.	41.234	43.297	38.6935	36.3735	38.9334	35.7894	37.633	35.7922	37.677	35.3391	40.8116	37.1866	39.0428	38.2979	37.6859
NIST612-1		n.a.	n.a.	40.23	44.6974	38.4055	35.9976	38.8435	35.8677	38.2884	36.4165	37.2964	36.0304	39.7516	37.0301	38.9448	38.0959	37.7574
NIST612-2		n.a.	n.a.	39.4161	43.47	38.1715	36.0009	37.7485	35.0311	37.0308	35.034	37.2973	35.2325	38.4922	36.0408	38.2683	37.4039	37.0595
NIST612-3		n.a.	n.a.	41.6211	45.4211	38.9621	36.0039	40.0974	36.9282	39.0433	36.6595	37.3016	36.0415	40.729	38.1816	39.8689	39.0339	38.3734
NIST612-4		n.a.	n.a.	39.0527	43.1852	38.1043	36.0009	37.6676	34.5301	36.7492	35.167	37.3024	35.2579	38.3776	36.1629	37.9051	37.2253	36.8784
NIST612-1		n.a.	n.a.	40.2882	44.6565	38.3701	36.0018	38.689	35.7455	37.9644	35.7482	37.3006	35.7052	39.569	37.1243	38.7622	37.9492	37.5339
NIST612-2		n.a.	n.a.	39.285	43.397	38.2342	35.9988	37.9288	35.1511	37.2765	35.4211	37.2993	35.1958	38.7029	36.2951	38.4877	37.6697	37.2561
NIST612-3		n.a.	n.a.	40.2236	44.2328	38.3483	36.0071	38.486	35.7592	37.8195	35.6722	37.3016	35.7171	39.5713	37.1156	38.7005	37.9472	37.4999
NIST612-4		n.a.	n.a.	39.8285	44.2598	38.3028	36.0017	38.7642	35.4582	37.7391	35.7222	37.3001	35.4633	39.097	36.4415	38.6224	37.7815	37.4294
NIST612-1		n.a.	n.a.	39.8561	43.8703	38.2914	35.9985	38.2872	35.5926	37.8027	35.4793	37.2978	35.4767	39.1192	36.7367	38.5365	37.7555	37.3268
NIST612-2		n.a.	n.a.	40.1524	44.5495	38.351	35.9992	39.129	35.5222	37.7422	36.1953	37.2983	35.7448	39.584	36.7552	38.7473	38.0038	37.5994
NIST612-3		n.a.	n.a.	39.3094	42.7798	38.1738	36.006	37.1862	34.8754	36.993	34.4605	37.3051	34.9677	37.2617	36.1799	37.9553	37.1993	36.8449
NIST612-4		n.a.	n.a.	40.7022	45.651	38.3959	36.004	39.6544	36.3215	38.8712	36.7163	37.3024	36.5238	40.164	37.1754	39.0259	38.4631	37.7358
NIST612-1		n.a.	n.a.	39.384	42.8981	38.2347	35.9959	37.9111	34.9998	37.1884	35.134	37.2982	35.1453	38.6809	36.3652	38.2956	37.428	37.0625
NIST612-2		n.a.	n.a.	40.977	44.8712	38.3937	36.0019	38.7054	36.0595	38.1422	36.1586	37.3012	35.9199	40.2028	36.9764	38.9421	38.1989	37.6712
NIST612-3		n.a.	n.a.	39.0515	43.0459	38.1938	36.0057	37.7943	34.913	37.2907	35.1823	37.3033	35.0441	38.755	36.3792	38.1615	37.5299	36.9081
NIST612-4		n.a.	n.a.	40.9267	45.57	38.4726	35.9963	38.9386	35.9608	38.2331	36.2961	37.2919	36.3044	40.5788	37.4375	39.0863	38.5121	38.0091
NIST612-1		n.a.	n.a.	39.5567	43.4009	38.2731	36.0049	37.8901	35.3499	37.3972	35.444	37.3023	35.2307	38.6399	36.4465	38.3863	37.6151	37.1811
NIST612-2		n.a.	n.a.	41.1149	45.0172	38.3523	36.0015	40.2843	35.8502	38.7023	36.4625	37.3012	35.9855	40.0915	37.0118	38.9802	38.1924	37.8818
NIST612-3		n.a.	n.a.	39.6906	43.7282	38.3327	36.0009	37.9291	35.4983	37.2552	35.31	37.3033	35.3858	38.8002	36.5627	38.4544	37.641	37.2277
NIST612-4		n.a.	n.a.	39.9011	43.9205	38.2626	36.0017	38.4653	35.3994	37.715	35.6611	37.2994	35.403	39.1737	36.6597	38.5385	37.7314	37.345
NIST612-1		n.a.	n.a.	40.212	44.4946	38.3965	35.9996	38.6799	35.6928	37.8217	35.9027	37.3	36.0793	39.5544	37.055	38.8307	38.124	37.6092
NIST612-2		n.a.	n.a.	39.8039	43.7753	38.287	36.0001	38.3327	35.3836	37.6895	35.5488	37.3008	35.2881	38.8896	36.4257	38.5057	37.7019	37.2857
NIST612-3		n.a.	n.a.	39.5884	44.0572	38.2815	35.9997	38.1372	35.3278	37.3081	35.3795	37.2985	35.4801	39.5156	36.9452	38.525	37.8063	37.3006
NIST612-4		n.a.	n.a.	40.2738	44.0209	38.4158	35.9996	38.8298	35.7907	38.3843	35.9622	37.2981	35.9278	39.2809	36.7617	38.8247	38.0407	37.657
NIST612-1		n.a.	n.a.	39.9854	44.4184	38.2756	35.998	38.4096	35.536	37.7674	35.5033	37.2994	35.3756	39.2566	36.6346	38.5579	37.7793	37.3873
NIST612-2		n.a.	n.a.	39.9209	43.5299	38.4268	35.9995	38.6104	35.64	37.5562	36.0232	37.2971	36.0333	39.2935	36.969	38.7038	37.9498	37.4358
NIST612-3		n.a.	n.a.	39.3538	43.826	38.2046	36.0015	37.817	34.8682	37.5379	34.9982	37.2988	34.5774	38.5714	36.4053	38.2322	37.3594	37.0378
NIST612-4		n.a.	n.a.	40.6637	44.4932	38.4368	36.0049	39.1978	36.1436	38.0183	36.0818	37.3036	36.0715	40.0141	36.9756	38.9068	38.1459	37.6711
NIST612-1		n.a.	n.a.	39.9965	44.2889	38.256	35.9989	38.0782	35.2868	37.5541	35.5502	37.2986	35.5257	38.8771	36.6824	38.5414	37.6726	37.3873
NIST612-2		n.a.	n.a.	39.6897	43.2115	38.3823	36	38.73	35.9097	37.9482	35.6904	37.3002	35.264	39.772	36.7006	38.5964	37.8969	37.383
NIST612-3		n.a.	n.a.	39.9514	44.0909	38.2577	36	38.3455	35.2096	37.6489	35.5101	37.298	35.5381	38.871	36.6809	38.5439	37.7366	37.3453
NIST612-4		n.a.	n.a.	39.8145	43.918	38.3778	35.9995	38.4251	35.6234	37.7158	35.7653	37.2975	35.4846	39.4938	36.7217	38.5919	37.823	37.4238
NIST612-1		n.a.	n.a.	40.1501	44.2828	38.3091	35.9997	38.4008	35.6043	37.7507	35.5744	37.299	35.5806	39.2928	36.8084	38.611	37.8607	37.4147
NIST612-2		n.a.	n.a.	39.5784	43.1843	38.1832	36.0021	38.1526	35.2482	37.545	35.44	37.2997	35.0849	39.004	36.4907	38.4015	37.5455	37.2073
NIST612-3		n.a.	n.a.	40.8704	44.9757	38.4595	36.0034	38.8601	36.2269	38.0058	36.1469	37.3012	36.3668	39.8449	37.4258	38.9856	38.2737	37.9794
NIST612-4		n.a.	n.a.	39.5672	43.4826	38.2127	36.001	37.8934	35.2326	37.4237	35.2922	37.3001	34.913	38.8943	36.3564	38.4266	37.5324	37.2284
NIST612-1		n.a.	n.a.	40.0978	44.4291	38.38	36.0018	38.7845	35.6521	37.9676	35.8382	37.3019	35.9595	39.4987	37.016	38.765	37.971	37.6602
NIST612-2		n.a.	n.a.	39.5426	43.3169	38.2038	35.9969	37.9012	34.9066	37.4467	35.1672	37.2982	35.1295	38.4141	36.301	38.2743	37.5335	37.1411
NIST612-3		n.a.	n.a.	40.5046	45.3791	38.5629	36.002	39.604	36.7175	38.5856	36.7511	37.3016	37.726	40.5118	37.335	39.1536	38.3279	38.0494
NIST612-4		n.a.	n.a.	39.4918	43.3527	38.109	35.9972	37.4957	34.7493	37.3175	35.0405	37.3006	34.6406	37.9443	36.1194	38.1319	37.3022	36.8519
NIST612-1		n.a.	n.a.	40.2201	44.4721	38.3434	36.0013	38.8749	35.9401	38.2781	36.0976	37.3009	36.035	39.3622	37.0548	38.9421	38.1122	37.6413
NIST612-2		n.a.	n.a.	39.9998	43.9761	38.3213	35.9922	38.4475	35.5432	37.6395	35.4549	37.2929	35.3664	39.4613	36.6454	38.4863	37.7727	37.3485
NIST612-3		n.a.	n.a.	39.4403	43.6405	38.2067	35.9972	38.0715	34.8317	37.3382	35.3191	37.2989	35.1454	38.5573	36.3518	38.4738	37.5585	37.1931
NIST612-4		n.a.	n.a.	41.0005	45.6532	38.4839	35.9966	38.8592	36.7403	38.6985	36.5344	37.2959	36.0922	40.655	37.3514	38.7781	38.6386	37.837
NIST612-1		n.a.	n.a.	40.555	44.5338	38.2693	36.0008	38.3922	35.4063	37.777	35.5482	37.3009	35.2997	39.1468	36.7572	38.5888	37.7852	37.5693
NIST612-2		n.a.	n.a.	39.7142	43.6627	38.3145	35.9996	38.3774	35.4864	37.5234	35.5697	37.3006	35.6146	39.0761	36.5776	38.5386	37.6866	37.2531
NIST612-3		n.a.	n.a.	39.5314	43.4468	38.2092	36.004	38.0744	35.0748	37.3078	35.3074	37.3003	34.9731	39.0127	36.4807	38.1644	37.6191	37.1297
NIST612-4		n.a.	n.a.	40.6588	46.5953	38.4725	36.0019	40.826	37.0214	39.3744	36.8188	37.3037	38.039	40.0254	37.8886	40.3977	38.5122	38.0635
NIST612-1		n.a.	n.a.	39.2866	42.6683	38.1513	36.0004	37.6737	34.963	37.0892	35.2421	37.2991	34.7527	38.6868	36.2812	37.9266	37.4307	36.7777
NIST612-2		n.a.	n.a.	41.2087	46.4595	38.4521	36.0043	39.3045	35.9192	38.9831	36.1764	37.302	36.1746	40.0823	37.6347	39.0364	38.6051	37.8869
NIST612-3		n.a.	n.a.	39.4283	42.8596	38.2613	35.997	37.7996	34.968	37.2466	35.0173	37.2983	35.0015	38.2463	36.2968	38.1993	37.2445	36.9087
NIST612-4		n.a.	n.a.	39.899	44.3093	38.2896	35.9994	38.4979	35.6041	38.3041	35.9035	37.3008	35.7316	39.6728	37.1971	38.6609	37.9373	37.4801
NIST612-1		n.a.	n.a.	41.6013	45.3086	38.4546	36.0095	39.2155	37.2714	38.6655	35.9437	37.3095	36.8543	39.5079	37.0632	39.6624	38.5327	38.1907
NIST612-2		n.a.	n.a.	39.3632	43.5475	38.2686	35.9989	38.2884	35.0691	37.5383	35.5128	37.3021	35.1032	39.1061	36.5974	38.345	37.6577	37.2483
NIST612-3		n.a.	n.a.	39.9137	43.832	38.2599	36.004	38.1317	35.5483	37.4888	35.4684	37.3035	35.4446	39.019	36.4912	38.607	37.7443	37.3396
NIST612-4		n.a.	n.a.	40.079	44.7441	38.4088	36.0015	38.9271	35.6108	38.13	36.0154	37.3018	36.1014	39.4635	37.1656	38.653	37.9826	37.5261
NIST612-1		n.a.	n.a.	40.0495	44.0586	38.272	35.9994	38.8519	36.4071	37.8856	35.8602	37.2985	35.579	39.9459	36.6125	38.7858	37.9199	37.4939
NIST612-2		n.a.	n.a.	39.7356	43.6034	38.3439	35.9976	38.1272	34.9735	37.4322	35.4676	37.299	35.4408	38.8952	36.7512	38.5119	37.7088	37.3
NIST612-3		n.a.	n.a.	39.4933	44.2734	38.1281	36.0007	37.9254	35.5574	37.5436	35.3442	37.2947	35.2032	38.8579	36.1873	38.3188	37.4393	37.1389
NIST612-4		n.a.	n.a.	40.4536	44.1469	38.5026	35.9957	39.2372	35.9979	38.1051	36.2029	37.293	35.9271	40.4076	37.6915	39.1795	38.3893	37.6797
NIST612-1		n.a.	n.a.	40.1109	44.0016	38.3698	36.0061	38.7542	35.819	38.4383	35.6476	37.3001	36.0707	39.5531	36.6761	39.0165	38.0378	38.0215
NIST612-2		n.a.	n.a.	39.3239	43.8863	38.1447	35.9979	37.6562	34.7689	37.2066	35.1189	37.2976	34.8645	38.5103	36.4036	38.0593	37.2296	37.0228
NIST612-3		n.a.	n.a.	40.9541	44.0008	38.5527	36.0023	39.2332	36.1677	38.4253	36.179	37.3016	36.6505	39.6755	37.1225	39.7736	38.6807	38.277
NIST612-4		n.a.	n.a.	39.6011	44.1578	38.222	35.9998	38.1223	35.4292	37.5446	35.5254	37.2998	35.1103	39.3486	36.5847	38.2984	37.5911	37.1485
NIST612-1		n.a.	n.a.	39.503	43.6335	38.1983	35.9979	38.2548	35.28	37.648	35.4697	37.2976	35.418	38.8788	36.4539	38.4973	37.6986	37.2975
NIST612-2		n.a.	n.a.	41.4441	45.8795	38.7002	36.0019	39.1997	36.6652	38.4379	36.5553	37.3008	36.2381	40.5485	37.4167	39.1996	38.4487	38.1416
NIST612-3		n.a.	n.a.	38.8818	42.1308	38.0089	35.9972	37.2517	34.4252	36.6921	34.7557	37.2995	34.6726	37.4541	35.6562	37.701	37.0391	36.7125
NIST612-4		n.a.	n.a.	44.5361	46.2623	39.0205	35.9983	39.8256	38.2826	40.1687	36.4576	37.2993	36.6268	42.0306	38.1825	40.8186	38.7765	39.0405
NIST612-1		n.a.	n.a.	39.646	43.806	38.2073	36.0023	38.3032	35.3199	37.3975	35.5465	37.2991	35.4093	39.0764	36.6827	38.3981	37.6704	37.2654
NIST612-2		n.a.	n.a.	39.7206	43.6347	38.4251	35.992	38.1636	35.2788	37.5441	35.4079	37.297	35.1064	38.6952	36.2272	38.4531	37.5792	37.2707
NIST612-3		n.a.	n.a.	40.3336	44.2974	38.1809	35.9975	38.814	35.7405	37.8703	35.7898	37.2965	36.1417	40.7914	37.5206	38.8718	38.2282	37.5938
NIST612-1		n.a.	n.a.	41.36	45.1928	38.464	35.9897	39.7535	36.5379	38.7838	36.1388	37.2926	36.326	39.245	37.2671	39.0906	38.4136	38.3147
NIST612-2		n.a.	n.a.	39.4111	42.9546	38.1859	35.9942	37.7388	34.9833	36.9236	34.8983	37.2956	35.0204	38.9575	36.2853	38.1519	37.3627	36.9903
NIST612-3		n.a.	n.a.	40.6056	44.8102	38.4343	36.0004	39.3831	35.9861	38.4595	35.8609	37.3001	36.3652	39.5812	37.2366	38.9997	38.3836	38.19
BHVO2G (Secondary standard)
BHVO2-1		n.a.	n.a.	31.0067	20000.4	14.384	7.47226	36.7244	28.797	5.52191	2.09807	2.4777	4.8203	1.89457	3.7211	1.98846	1.02897	0.457642
BHVO2-2		n.a.	n.a.	30.4564	19036.9	14.1963	7.07465	35.1141	27.8692	5.17477	2.06016	2.51405	4.6988	1.87287	3.6967	1.90343	0.98599	0.445237
BHVO2-3		n.a.	n.a.	30.4099	20414.1	14.4449	7.62658	38.2776	29.2537	5.64281	2.03886	2.79151	4.90703	1.84018	3.44199	1.90019	1.02463	0.460506
BHVO2-4		n.a.	n.a.	36.3855	22940	29.0333	17.4058	49.2632	33.7288	7.21366	2.73621	6.46501	5.69929	2.44054	5.0362	2.25106	1.35377	0.607161
BHVO2-5		n.a.	n.a.	35.8711	21770.7	28.5337	15.3692	45.715	33.0654	6.85581	2.48957	5.70163	5.2696	2.36321	4.53532	2.27728	1.30315	0.574699
BHVO2-6		n.a.	n.a.	35.4313	21680.5	27.8009	15.1186	46.8535	31.6997	6.82214	2.46031	5.41608	5.32324	2.33372	4.7242	2.2027	1.32198	0.566277
BHVO2-7		n.a.	n.a.	35.8893	22339.5	25.2922	14.8407	46.638	33.6515	6.75808	2.33698	6.45622	5.12723	2.0401	4.52919	2.26001	1.35631	0.556005
BHVO2-8		n.a.	n.a.	35.7538	21542.1	26.8924	14.8914	47.1764	33.212	7.01761	2.4633	5.96473	5.43718	2.35223	4.37458	2.28363	1.36575	0.583885
BHVO2-9		n.a.	n.a.	35.2894	21920.5	24.622	13.2987	45.7724	31.9769	6.46665	2.39264	5.42045	4.91117	2.21036	4.02903	2.28721	1.25091	0.560762
BHVO2-1		n.a.	n.a.	30.4329	18635.2	19.9026	13.9919	36.9201	29.0828	5.98559	1.84682	5.52932	4.39543	2.06335	3.97611	1.98055	1.0542	0.459985
BHVO2-2		n.a.	n.a.	34.2231	19338.6	23.6402	16.1493	43.0913	30.4684	6.53311	2.1988	6.05105	4.58574	2.0903	4.11087	2.10645	1.19545	0.550499
BHVO2-3		n.a.	n.a.	31.6659	19159.7	19.8491	13.6894	39.1134	28.6795	5.48168	2.13605	5.85454	4.92601	1.94119	3.74652	1.96149	1.13023	0.501699
BHVO2-4		n.a.	n.a.	38.8817	22157.8	27.0365	18.4969	50.4888	33.1257	7.67206	2.53925	6.82029	5.60481	2.1747	5.37483	2.51244	1.39081	0.62263
BHVO2-1		n.a.	n.a.	29.9849	17698.6	22.1152	14.0149	38.8085	30.051	5.64046	2.29734	5.61666	4.7875	1.97322	3.81005	2.12897	1.19119	0.505085
BHVO2-2		n.a.	n.a.	38.3846	22032.3	25.4587	19.2645	50.3968	36.9893	7.00196	2.72456	6.97702	5.4148	2.38273	5.07646	2.44955	1.46003	0.561254
BHVO2-3		n.a.	n.a.	34.3026	21250.8	22.4685	17.1462	44.7261	32.5125	6.90807	2.45282	6.55205	4.94583	2.24397	4.18295	2.22135	1.31708	0.529489
BHVO2-4		n.a.	n.a.	29.3082	18579.6	20.6248	15.1063	38.3823	28.2578	6.13887	2.00989	6.21688	5.01025	2.01416	3.6854	1.86361	1.12103	0.476368
BHVO2-1		n.a.	n.a.	32.9166	22160	22.9259	16.4535	49.4788	32.0236	6.97594	2.61769	6.84439	4.78024	2.25576	4.43963	2.26285	1.25978	0.559941
BHVO2-2		n.a.	n.a.	35.2795	23951.1	25.8749	18.5111	48.1734	35.5076	7.51951	2.66152	7.50109	5.28823	2.61905	4.71879	2.43386	1.46645	0.601032
BHVO2-3		n.a.	n.a.	34.7367	22916.7	26.4562	19.4131	51.9032	34.5442	7.77262	2.67825	7.46499	5.59237	2.41868	4.9716	2.53865	1.43919	0.636451
BHVO2-4		n.a.	n.a.	31.25	19726.2	21.6313	14.0187	41.982	28.3451	5.77679	2.04574	5.61514	4.87589	2.07439	3.96776	2.07976	1.06971	0.499746
BHVO2-1		n.a.	n.a.	35.931	20805.1	24.2639	16.7538	46.815	32.2195	6.91737	2.39441	6.98529	5.19863	2.19953	4.4328	2.33556	1.31331	0.601466
BHVO2-2		n.a.	n.a.	36.8394	22690.6	24.7826	17.5362	48.0937	33.8101	7.34307	2.63249	6.43962	5.13376	2.29194	5.07526	2.29072	1.346	0.560749
BHVO2-3		n.a.	n.a.	33.1289	22749.5	25.249	17.5352	43.7806	31.1395	6.82317	2.77323	7.13671	5.68787	2.40861	4.78011	2.22071	1.33061	0.552337
BHVO2-4		n.a.	n.a.	34.3189	21561.3	25.0338	16.6903	46.5693	33.8784	7.73564	2.49402	6.83653	5.62604	2.31542	4.6263	2.34531	1.30619	0.550378
BHVO2-1		n.a.	n.a.	37.374	22170.2	24.4101	17.2334	46.8795	31.7272	7.02615	2.48045	6.92838	5.28949	2.2976	4.49359	2.26095	1.30858	0.57028
BHVO2-2		n.a.	n.a.	31.6637	20104.1	24.5496	15.3433	43.9412	32.18	6.06301	2.46343	5.99746	5.04744	2.2218	4.10243	2.10601	1.24968	0.521912
BHVO2-3		n.a.	n.a.	33.3163	20639.5	24.2542	17.3448	45.0417	33.1739	6.91837	2.53685	6.73511	5.39875	2.19662	4.2628	2.0829	1.31995	0.501963
BHVO2-4		n.a.	n.a.	42.6719	26490.7	31.3436	20.4652	60.9121	40.6387	8.80358	3.15194	8.3235	6.51264	2.67653	5.99862	2.95067	1.69836	0.68349
BHVO2-1		n.a.	n.a.	32.5522	18993	22.2265	15.1093	38.3444	29.0607	6.32298	2.18932	5.84009	4.79634	1.88165	4.33375	1.91284	1.16775	0.43
BHVO2-2		n.a.	n.a.	32.1353	20769.9	25.3034	17.5844	45.2291	30.9615	6.92676	2.49054	7.09031	5.85792	2.48431	4.99614	2.12504	1.413	0.554088
BHVO2-3		n.a.	n.a.	35.6735	23238.5	26.9796	17.3003	49.1546	33.5398	7.08328	2.74054	6.88816	5.86442	2.34463	4.74704	2.26539	1.36476	0.58508
BHVO2-4		n.a.	n.a.	30.8842	21576.9	23.8071	16.1112	42.1329	31.3436	6.52539	2.3206	6.61434	4.91028	2.18019	4.10478	2.01737	1.23872	0.487938
BHVO2-1		n.a.	n.a.	29.6045	18834.3	21.4016	14.28	39.2848	28.921	6.09559	2.20184	6.11883	4.95188	1.8704	3.87136	2.0224	1.17446	0.490274
BHVO2-2		n.a.	n.a.	33.3456	21525.7	22.3903	16.0833	43.3107	30.6914	6.59485	2.37687	6.36795	5.23269	2.10424	4.50164	2.04436	1.23489	0.543721
BHVO2-3		n.a.	n.a.	37.2425	22258.2	26.1016	17.2821	47.2589	36.1688	6.7069	2.64581	7.0269	5.40023	2.22765	5.01209	2.32776	1.38754	0.575601
BHVO2-4		n.a.	n.a.	34.2876	23354.1	26.1966	17.8634	46.1535	32.5062	6.83794	2.49017	7.24886	5.35263	2.34201	4.71705	2.42708	1.32099	0.554852
BHVO2-1		n.a.	n.a.	29.8821	19209.2	20.705	15.2829	42.823	28.7983	6.3054	2.1991	6.00326	4.63093	2.13498	4.25352	2.00003	1.16358	0.526033
BHVO2-2		n.a.	n.a.	31.8961	20029.4	21.6862	15.9019	42.4786	30.0432	6.45545	2.20106	6.24864	5.21819	2.23157	4.44075	2.0272	1.21135	0.49941
BHVO2-3		n.a.	n.a.	32.8813	19742.9	23.6793	15.6021	44.9709	30.3889	6.52288	2.31133	6.79105	4.83891	1.82777	4.20055	2.05092	1.27303	0.523438
BHVO2-4		n.a.	n.a.	39.74	22004.4	23.3892	16.8194	52.6627	32.9404	7.01035	2.51102	6.60157	5.42255	2.23482	4.28656	2.43811	1.35677	0.602208
BHVO2-1		n.a.	n.a.	29.4693	18407.4	20.3064	15.3204	40.7158	27.9012	5.93581	2.13821	5.87206	4.73602	1.88469	3.9134	2.15585	1.14916	0.514281
BHVO2-2		n.a.	n.a.	31.6865	18681.6	22.3284	16.8983	39.1816	28.3986	5.96544	2.21192	6.74864	4.74062	2.01473	4.50217	1.93993	1.24379	0.495127
BHVO2-3		n.a.	n.a.	31.4806	19147.8	21.7737	13.9778	38.61	28.9048	6.08331	2.1471	5.85022	4.37332	1.96778	3.93162	1.92426	1.13263	0.483328
BHVO2-4		n.a.	n.a.	41.0393	25315.5	29.9252	21.2598	51.8846	37.6314	7.75597	3.09657	8.10116	6.62153	2.94092	5.48038	2.89126	1.58016	0.660956
BHVO2-1		n.a.	n.a.	35.3406	21494	25.0662	17.1745	45.851	34.081	7.11488	2.52793	6.95685	5.8144	2.38682	4.36112	2.51119	1.35787	0.611477
BHVO2-2		n.a.	n.a.	34.3367	21362.5	27.5247	18.1546	47.3716	34.3619	7.11675	2.34195	7.24651	5.69982	2.26438	4.69112	2.23731	1.33725	0.557641
BHVO2-3		n.a.	n.a.	32.2707	19792.3	22.0279	15.3878	40.8587	30.2211	6.06632	2.23175	5.62017	4.67721	2.18309	3.95808	1.91913	1.1856	0.480199
BHVO2-4		n.a.	n.a.	34.1891	21886.7	26.5053	18.6627	49.9687	33.7283	7.70525	2.82909	7.06467	5.94536	2.36131	4.53379	2.32775	1.44479	0.599806
BHVO2-1		n.a.	n.a.	30.5755	18576	21.3101	15.331	41.2558	28.9359	5.99318	2.036	5.98823	4.71185	1.97365	3.73448	1.98925	1.11064	0.506442
BHVO2-2		n.a.	n.a.	33.0298	18997.8	23.7837	14.7826	41.0523	28.1803	6.64958	2.46104	6.02464	5.50618	2.15284	4.19987	2.00454	1.3264	0.514389
BHVO2-3		n.a.	n.a.	35.8268	21407.5	25.3915	18.2194	46.185	31.3469	7.24615	2.57071	7.54538	5.64568	2.11277	3.96009	2.15839	1.41361	0.51633
BHVO2-4		n.a.	n.a.	34.086	20989.3	24.8974	15.4762	44.2924	31.8155	6.67695	2.35835	5.91419	5.20809	2.01566	4.13995	2.26327	1.26424	0.531037
BHVO2-1		n.a.	n.a.	30.3979	20504.7	25.5925	15.1506	45.0945	30.9704	6.40562	2.41164	6.36696	4.4133	1.9389	4.03112	2.24091	1.20266	0.526961
BHVO2-2		n.a.	n.a.	34.8887	21812	25.8324	16.6626	43.5109	31.6313	7.32246	2.34829	6.29396	5.65344	2.17051	4.43641	2.24231	1.27194	0.521376
BHVO2-3		n.a.	n.a.	34.2776	20471.9	22.7783	15.0583	43.3873	29.2852	6.23469	2.1278	6.48796	5.53939	2.25184	4.71374	1.95327	1.21271	0.4901
BHVO2-4		n.a.	n.a.	29.8068	18153.2	22.2635	15.0468	38.727	27.0742	5.883	1.99791	5.49138	4.91146	2.04191	3.85154	1.78013	1.14532	0.463575
BHVO2-1		n.a.	n.a.	37.9792	23467.6	26.8377	18.272	50.0965	33.7278	6.95974	2.61129	7.09044	5.7163	2.34925	4.76673	2.46303	1.45895	0.627731
BHVO2-2		n.a.	n.a.	32.7297	19656.8	22.9557	14.9445	40.9303	26.7588	6.34633	2.08215	5.92871	5.43248	1.92873	4.39811	1.98219	1.18684	0.469177
BHVO2-3		n.a.	n.a.	29.424	18020.9	21.337	16.7142	39.028	28.9123	6.32903	2.16012	6.04855	5.38665	2.12988	4.26208	1.84151	1.17309	0.487925
BHVO2-4		n.a.	n.a.	35.0182	20945	25.4212	16.2976	45.4252	31.2455	6.62083	2.28189	6.48447	5.57068	1.94412	3.88691	2.16584	1.27139	0.546185
BHVO2-1		n.a.	n.a.	29.3405	18331.8	20.986	15.0061	39.3903	27.0185	5.32628	2.06901	5.30613	4.71874	2.01079	3.97259	1.85873	1.09484	0.474133
BHVO2-2		n.a.	n.a.	36.2071	20643.2	23.1643	16.497	40.6694	31.0067	6.47949	2.4299	7.70735	5.49703	2.15506	4.74431	2.12417	1.29679	0.576017
BHVO2-3		n.a.	n.a.	38.8041	22314.7	25.9318	17.3243	47.3069	34.0785	7.35499	2.66483	7.7158	6.00031	2.51017	4.83405	2.2732	1.41831	0.570224
BHVO2-4		n.a.	n.a.	32.2905	21048.4	25.2286	17.0645	43.2618	31.6202	6.68003	2.46246	6.54726	5.1148	2.20179	4.38973	2.29337	1.29364	0.543257
BHVO2-1		n.a.	n.a.	31.5721	19523.3	21.8852	13.8471	36.4002	26.0642	5.74351	2.08244	5.87472	4.78954	1.71634	3.98608	1.89924	1.1111	0.463771
BHVO2-2		n.a.	n.a.	33.4413	20513.6	23.6743	15.8428	42.7186	29.3453	6.25981	2.30226	6.21558	5.23579	2.12608	4.26368	1.9662	1.21771	0.511451
BHVO2-3		n.a.	n.a.	32.2666	19409.7	25.462	15.5874	40.5007	28.8524	6.51914	2.38084	6.40674	5.71579	2.01404	3.91563	2.01563	1.18701	0.535394
BHVO2-4		n.a.	n.a.	29.2002	17659.9	19.7456	13.679	35.3465	24.7771	5.73833	1.8333	5.40266	4.57143	1.83088	3.69877	1.75248	1.06513	0.415827
BHVO2-1		n.a.	n.a.	30.629	18171	20.6544	13.9381	37.7417	27.4199	5.88153	2.01524	5.44544	4.99717	2.13408	3.87244	1.91711	1.08082	0.457343
BHVO2-2		n.a.	n.a.	30.8814	18590.8	24.0866	16.5837	38.7823	28.88	6.68496	2.26382	6.38463	5.13011	2.08217	4.1566	1.94507	1.18726	0.508329
BHVO2-3		n.a.	n.a.	34.1555	20446.3	26.3106	17.4796	45.2973	30.5606	6.85355	2.37011	6.72147	5.44031	2.32446	4.50995	2.06211	1.25148	0.506779
BHVO2-4		n.a.	n.a.	37.2451	22546.3	28.7249	16.157	44.1769	33.4063	7.24907	2.59902	7.28363	5.86362	2.24787	4.57921	2.43447	1.44864	0.569136
BHVO2-1		n.a.	n.a.	33.2772	21634.7	26.9326	16.2033	44.9984	33.0343	6.74419	2.63419	6.45477	5.41287	2.39418	4.51251	2.19918	1.299	0.55873
BHVO2-2		n.a.	n.a.	30.7189	19050.4	21.8119	14.2132	40.3033	29.4298	6.48729	2.36639	6.72916	4.70938	1.95193	3.90458	1.91191	1.23735	0.491531
BHVO2-3		n.a.	n.a.	34.2237	21245.6	26.5321	16.8565	43.086	31.1381	6.92207	2.47416	6.92401	5.16488	1.8581	4.79243	2.25641	1.30839	0.522874
BHVO2-4		n.a.	n.a.	33.4431	20004.9	19.9694	13.3557	42.8948	29.7382	6.02732	2.41496	6.42776	4.82442	2.07558	3.79524	1.9113	1.23467	0.491247
BHVO2-1		n.a.	n.a.	31.5371	19263.2	21.9667	14.0933	38.9118	29.7043	5.77861	1.97161	5.83895	4.33411	2.11256	3.85006	2.12097	1.13581	0.486448
BHVO2-2		n.a.	n.a.	30.5719	18585.7	20.2364	16.2775	40.5705	28.3537	5.83092	2.07086	5.23962	4.6781	1.98095	4.22657	1.94354	1.16782	0.504068
BHVO2-3		n.a.	n.a.	25.9412	16827.9	20.1517	12.0636	35.8463	23.9026	5.06943	1.77186	5.12901	4.08383	1.77253	3.36811	1.64915	0.974661	0.41686
BHVO2-1		n.a.	n.a.	26.7666	16965.2	18.4567	12.3789	36.9504	24.6871	5.33884	2.01221	4.96345	4.35371	1.91498	3.53713	1.85164	1.02137	0.46017
BHVO2-2		n.a.	n.a.	32.7097	19214.2	22.7801	14.6636	40.0601	26.6586	6.02496	2.11882	6.21115	5.05443	1.99467	3.77518	1.98633	1.22546	0.479073
BHVO2-3		n.a.	n.a.	36.8184	21977.3	25.4441	17.7778	46.4699	34.4343	6.85567	2.6145	7.26214	5.67136	2.21455	5.39407	2.18992	1.33183	0.567402

## Sheet: Table 6 U-Pb +TEs titanite 
Table 6. U-Pb isotope and trace element data for SCB titanites and standards.
				Isotope Ratios¶					Apparent Ages¶																														P	Act. TiO2	Act. SiO2		Temp. (Zr90)	average	stdev
	U	U/Th		238U	2 sigma	207Pb	2 sigma	207Pb/206Pb v 238U/206Pb	207/235	1 sigma	206/238	1 sigma	207/206	1 sigma		Best age	1 sigma		% discordance			Zr91_ppm_mean	Zr91_ppm_2SE(int)	La139_ppm_mean	La139_ppm_2SE(int)	Nd142_ppm_mean	Nd142_ppm_2SE(int)	Sm152_ppm_mean	Sm152_ppm_2SE(int)	Dy164_ppm_mean	Dy164_ppm_2SE(int)	Yb174_ppm_mean	Yb174_ppm_2SE(int)	Th232_ppm_mean	Th232_ppm_2SE(int)	U238_ppm_mean	U238_ppm_2SE(int)
Analysis	(ppm)			206Pb	abs	206Pb	abs	error corr	age	abs err	age	abs err	age	abs err		age†	abs err		6/8 vs. 7/5	6/8 vs. 7/6																			0.6	0.7	1
									Ma	Ma	Ma	Ma	Ma	Ma		Ma	Ma
21CM33_1	5.8674	0.0436319		37.8801	1.71171	0.587641	0.0543594	0.447875	1161.2	28.6	167.97	3.75	4477.1	67.3		75.89	1.7		-591.314	-2565.42		n.d.	n.d.	n.d.	n.d.	n.d.	n.d.	n.d.	n.d.	n.d.	n.d.	n.d.	n.d.	n.d.	n.d.	n.d.	n.d.						#VALUE!	#VALUE!	#VALUE!
21CM33_10	6.12774	0.0456863		41.5582	2.30339	0.512049	0.0505969	0.473245	1007.8	28	153.28	4.2	4275.6	72.7		81.05	2.23		-557.49	-2689.41		n.d.	n.d.	n.d.	n.d.	n.d.	n.d.	n.d.	n.d.	n.d.	n.d.	n.d.	n.d.	n.d.	n.d.	n.d.	n.d.
21CM33_11	6.31716	0.0486814		43.2299	2.38302	0.477521	0.0424165	0.315232	939.4	27.1	147.42	4.02	4172.6	65.7		83.13	2.28		-537.227	-2730.42		n.d.	n.d.	n.d.	n.d.	n.d.	n.d.	n.d.	n.d.	n.d.	n.d.	n.d.	n.d.	n.d.	n.d.	n.d.	n.d.
21CM33_12	6.0262	0.0468385		40.3572	2.21254	0.464573	0.0427439	0.317759	964.9	28.3	157.79	4.27	4131.9	68.2		91.11	2.48		-511.509	-2518.61		n.d.	n.d.	n.d.	n.d.	n.d.	n.d.	n.d.	n.d.	n.d.	n.d.	n.d.	n.d.	n.d.	n.d.	n.d.	n.d.
21CM33_13	6.21082	0.0481954		42.5902	2.21178	0.477354	0.0448532	0.434085	948.4	26.3	149.61	3.84	4172.1	69.5		84.4	2.18		-533.915	-2688.65		n.d.	n.d.	n.d.	n.d.	n.d.	n.d.	n.d.	n.d.	n.d.	n.d.	n.d.	n.d.	n.d.	n.d.	n.d.	n.d.
21CM33_14	5.89174	0.0462607		41.891	2.47529	0.4926	0.0416555	0.251554	978.2	28.3	152.08	4.44	4218.6	62.4		83.43	2.45		-543.214	-2673.93		n.d.	n.d.	n.d.	n.d.	n.d.	n.d.	n.d.	n.d.	n.d.	n.d.	n.d.	n.d.	n.d.	n.d.	n.d.	n.d.
21CM33_15	6.25594	0.0473616		41.2886	2.11192	0.502868	0.0483792	0.450285	1000.4	27.4	154.27	3.9	4249	70.9		83.03	2.11		-548.473	-2654.26		n.d.	n.d.	n.d.	n.d.	n.d.	n.d.	n.d.	n.d.	n.d.	n.d.	n.d.	n.d.	n.d.	n.d.	n.d.	n.d.
21CM33_16	5.90965	0.0479364		41.664	2.10766	0.499652	0.0376579	0.638115	990.6	18.4	152.9	3.82	4239.5	55.6		82.78	2.08		-547.874	-2672.73		n.d.	n.d.	n.d.	n.d.	n.d.	n.d.	n.d.	n.d.	n.d.	n.d.	n.d.	n.d.	n.d.	n.d.	n.d.	n.d.
21CM33_17	5.80293	0.0532092		40.121	1.79311	0.454497	0.0367657	0.439307	955	22.7	158.7	3.5	4099.3	60.1		93.27	2.07		-501.764	-2483.05		n.d.	n.d.	n.d.	n.d.	n.d.	n.d.	n.d.	n.d.	n.d.	n.d.	n.d.	n.d.	n.d.	n.d.	n.d.	n.d.
21CM33_18	5.70272	0.0517287		40.1909	1.66627	0.447932	0.0453333	0.331814	944.9	29.5	158.43	3.24	4077.7	75.3		94.17	1.94		-496.415	-2473.82		n.d.	n.d.	n.d.	n.d.	n.d.	n.d.	n.d.	n.d.	n.d.	n.d.	n.d.	n.d.	n.d.	n.d.	n.d.	n.d.
21CM33_19	5.71388	0.0520894		40.8878	1.77565	0.486698	0.042969	0.419303	985.9	25.4	155.76	3.34	4200.8	65.2		86.41	1.86		-532.961	-2596.97		n.d.	n.d.	n.d.	n.d.	n.d.	n.d.	n.d.	n.d.	n.d.	n.d.	n.d.	n.d.	n.d.	n.d.	n.d.	n.d.
21CM33_2	6.23893	0.0472129		37.8256	1.96504	0.49935	0.0419646	0.322911	1052.5	27.3	168.21	4.31	4238.6	61.9		91.19	2.35		-525.706	-2419.83		n.d.	n.d.	n.d.	n.d.	n.d.	n.d.	n.d.	n.d.	n.d.	n.d.	n.d.	n.d.	n.d.	n.d.	n.d.	n.d.
21CM33_20	5.70261	0.0517954		40.4038	1.53672	0.493696	0.0624191	0.53025	1002.5	35.4	157.61	2.96	4221.8	93.3		86.31	1.63		-536.064	-2578.64		n.d.	n.d.	n.d.	n.d.	n.d.	n.d.	n.d.	n.d.	n.d.	n.d.	n.d.	n.d.	n.d.	n.d.	n.d.	n.d.
21CM33_21	5.18122	0.0409274		39.833	1.72704	0.512401	0.0459051	0.139867	1035.6	30.5	159.84	3.42	4276.6	65.9		84.49	1.82		-547.898	-2575.55		n.d.	n.d.	n.d.	n.d.	n.d.	n.d.	n.d.	n.d.	n.d.	n.d.	n.d.	n.d.	n.d.	n.d.	n.d.	n.d.
21CM33_22	4.99475	0.0441513		44.8695	2.15698	0.442813	0.045542	0.334858	871.9	28.6	142.09	3.38	4060.6	76.6		85.14	2.03		-513.625	-2757.77		n.d.	n.d.	n.d.	n.d.	n.d.	n.d.	n.d.	n.d.	n.d.	n.d.	n.d.	n.d.	n.d.	n.d.	n.d.	n.d.
21CM33_23	5.48911	0.046806		37.7298	1.73014	0.463108	0.0352256	0.390079	1005.4	22.9	168.63	3.82	4127.2	56.4		97.67	2.22		-496.217	-2347.49		n.d.	n.d.	n.d.	n.d.	n.d.	n.d.	n.d.	n.d.	n.d.	n.d.	n.d.	n.d.	n.d.	n.d.	n.d.	n.d.
21CM33_24	5.51877	0.0469874		41.5455	1.73845	0.452784	0.0411844	0.468079	931.2	24.5	153.33	3.17	4093.7	67.6		90.36	1.88		-507.318	-2569.86		n.d.	n.d.	n.d.	n.d.	n.d.	n.d.	n.d.	n.d.	n.d.	n.d.	n.d.	n.d.	n.d.	n.d.	n.d.	n.d.
21CM33_25	5.60387	0.0473514		41.896	1.74471	0.505858	0.0434245	0.253785	994.9	27.1	152.06	3.13	4257.7	63.2		81.36	1.68		-554.281	-2700.01		n.d.	n.d.	n.d.	n.d.	n.d.	n.d.	n.d.	n.d.	n.d.	n.d.	n.d.	n.d.	n.d.	n.d.	n.d.	n.d.
21CM33_26	6.65049	0.0541985		46.0996	2.27801	0.476704	0.040851	0.533354	899.5	21.7	138.34	3.38	4170.1	63.4		78.09	1.92		-550.21	-2914.38		n.d.	n.d.	n.d.	n.d.	n.d.	n.d.	n.d.	n.d.	n.d.	n.d.	n.d.	n.d.	n.d.	n.d.	n.d.	n.d.
21CM33_3	6.68298	0.0525573		40.641	2.04621	0.489053	0.0405503	0.363444	992.8	25.3	156.7	3.9	4207.9	61.2		86.55	2.16		-533.567	-2585.32		n.d.	n.d.	n.d.	n.d.	n.d.	n.d.	n.d.	n.d.	n.d.	n.d.	n.d.	n.d.	n.d.	n.d.	n.d.	n.d.
21CM33_4	6.77424	0.0496115		43.1085	2.54123	0.516132	0.0687472	0.694807	989.6	32.1	147.83	4.31	4287.3	97.9		77.53	2.27		-569.418	-2800.16		n.d.	n.d.	n.d.	n.d.	n.d.	n.d.	n.d.	n.d.	n.d.	n.d.	n.d.	n.d.	n.d.	n.d.	n.d.	n.d.
21CM33_5	6.46943	0.0458856		41.5175	1.98222	0.515123	0.0452213	0.465876	1012.3	25	153.43	3.62	4284.4	64.5		80.65	1.91		-559.78	-2692.41		n.d.	n.d.	n.d.	n.d.	n.d.	n.d.	n.d.	n.d.	n.d.	n.d.	n.d.	n.d.	n.d.	n.d.	n.d.	n.d.
21CM33_6	3.24789	0.0346465		34.9451	1.85131	0.498517	0.060356	0.397961	1104	37.4	181.88	4.75	4236.2	89.3		98.82	2.6		-506.994	-2229.12		n.d.	n.d.	n.d.	n.d.	n.d.	n.d.	n.d.	n.d.	n.d.	n.d.	n.d.	n.d.	n.d.	n.d.	n.d.	n.d.
21CM33_7	6.39037	0.0472569		39.2585	1.85035	0.468081	0.0345982	0.185424	986.9	25.2	162.15	3.77	4143	54.8		93.06	2.18		-508.634	-2455.04		n.d.	n.d.	n.d.	n.d.	n.d.	n.d.	n.d.	n.d.	n.d.	n.d.	n.d.	n.d.	n.d.	n.d.	n.d.	n.d.
21CM33_8	5.92604	0.0416254		41.3246	2.03243	0.54275	0.0434209	0.536527	1049.1	22.2	154.14	3.75	4361.1	58.6		76.67	1.87		-580.615	-2729.31		n.d.	n.d.	n.d.	n.d.	n.d.	n.d.	n.d.	n.d.	n.d.	n.d.	n.d.	n.d.	n.d.	n.d.	n.d.	n.d.
21CM33_9	6.21258	0.0455241		41.2697	1.83355	0.476238	0.0405427	0.0588025	966.4	29.2	154.34	3.39	4168.6	63		87.26	1.93		-526.15	-2600.92		n.d.	n.d.	n.d.	n.d.	n.d.	n.d.	n.d.	n.d.	n.d.	n.d.	n.d.	n.d.	n.d.	n.d.	n.d.	n.d.
21CM33-27	6.60794	0.0373738		41.6421	2.13104	0.483441	0.0398548	0.363257	970.2	24.9	152.98	3.87	4190.8	60.9		85.36	2.17		-534.201	-2639.44		n.d.	n.d.	n.d.	n.d.	n.d.	n.d.	n.d.	n.d.	n.d.	n.d.	n.d.	n.d.	n.d.	n.d.	n.d.	n.d.
21CM33-28	6.38132	0.0356069		40.3089	2.21126	0.457635	0.037839	0.546729	956.3	21.7	157.97	4.28	4109.5	61.4		92.33	2.51		-505.368	-2501.44		n.d.	n.d.	n.d.	n.d.	n.d.	n.d.	n.d.	n.d.	n.d.	n.d.	n.d.	n.d.	n.d.	n.d.	n.d.	n.d.
21CM33-29	6.54126	0.0324349		39.0491	1.58911	0.459467	0.0429013	0.727284	978.6	21.9	163.01	3.28	4115.5	69.3		94.99	1.92		-500.331	-2424.69		n.d.	n.d.	n.d.	n.d.	n.d.	n.d.	n.d.	n.d.	n.d.	n.d.	n.d.	n.d.	n.d.	n.d.	n.d.	n.d.
21CM33-30	6.38034	0.0386072		41.5739	1.6995	0.48223	0.0436924	0.451359	969.7	25.3	153.22	3.09	4187.1	67		85.69	1.74		-532.881	-2632.74		n.d.	n.d.	n.d.	n.d.	n.d.	n.d.	n.d.	n.d.	n.d.	n.d.	n.d.	n.d.	n.d.	n.d.	n.d.	n.d.
21CM33-31	7.61612	0.0578529		44.0378	2.22749	0.412535	0.0420571	0.45973	841.8	25.9	144.75	3.62	3954.7	76.4		91.22	2.29		-481.554	-2632.09		n.d.	n.d.	n.d.	n.d.	n.d.	n.d.	n.d.	n.d.	n.d.	n.d.	n.d.	n.d.	n.d.	n.d.	n.d.	n.d.
21CM33-32	11.6804	0.033449		43.945	2.06883	0.416415	0.0387643	0.560518	848.3	22.2	145.05	3.38	3968.8	69.7		90.83	2.12		-484.833	-2636.16		n.d.	n.d.	n.d.	n.d.	n.d.	n.d.	n.d.	n.d.	n.d.	n.d.	n.d.	n.d.	n.d.	n.d.	n.d.	n.d.
21CM33-33	13.0414	0.0441954		44.4281	1.68185	0.364909	0.0361321	0.407746	768.7	24.4	143.49	2.69	3769.7	75.1		97.39	1.83		-435.717	-2527.15		n.d.	n.d.	n.d.	n.d.	n.d.	n.d.	n.d.	n.d.	n.d.	n.d.	n.d.	n.d.	n.d.	n.d.	n.d.	n.d.
21CM33-34	16.2781	0.0472328		49.6757	2.00647	0.337618	0.0299629	0.317086	671.1	20.9	128.48	2.57	3651.3	67.9		90.72	1.82		-422.338	-2741.92		n.d.	n.d.	n.d.	n.d.	n.d.	n.d.	n.d.	n.d.	n.d.	n.d.	n.d.	n.d.	n.d.	n.d.	n.d.	n.d.
21CM33-35	16.3395	0.0458805		49.3075	2.26415	0.353276	0.0370733	0.566533	697.4	22.1	129.43	2.94	3720.5	79.9		89.33	2.04		-438.824	-2774.53		n.d.	n.d.	n.d.	n.d.	n.d.	n.d.	n.d.	n.d.	n.d.	n.d.	n.d.	n.d.	n.d.	n.d.	n.d.	n.d.
21CM33-36	9.26406	0.044711		40.2305	2.21649	0.46042	0.0389456	0.273901	961.3	27.2	158.28	4.31	4118.6	62.8		92.06	2.52		-507.341	-2502.1		n.d.	n.d.	n.d.	n.d.	n.d.	n.d.	n.d.	n.d.	n.d.	n.d.	n.d.	n.d.	n.d.	n.d.	n.d.	n.d.
21CM33-37	7.84952	0.0648865		35.6344	1.81319	0.433968	0.0401248	0.65323	1000.4	22.5	178.41	4.48	4030.5	69		108.69	2.74		-460.731	-2159.12		n.d.	n.d.	n.d.	n.d.	n.d.	n.d.	n.d.	n.d.	n.d.	n.d.	n.d.	n.d.	n.d.	n.d.	n.d.	n.d.
21CM33-38	12.7034	0.0420817		42.6492	2.06361	0.372366	0.0343221	0.303434	802.1	25	149.41	3.57	3800.4	69.8		100.29	2.41		-436.845	-2443.6		n.d.	n.d.	n.d.	n.d.	n.d.	n.d.	n.d.	n.d.	n.d.	n.d.	n.d.	n.d.	n.d.	n.d.	n.d.	n.d.
21CM33-39	18.0803	0.0416808		45.7585	1.91305	0.337598	0.0297584	0.42574	712.3	20.4	139.36	2.88	3651.2	67.4		98.45	2.04		-411.122	-2519.98		n.d.	n.d.	n.d.	n.d.	n.d.	n.d.	n.d.	n.d.	n.d.	n.d.	n.d.	n.d.	n.d.	n.d.	n.d.	n.d.
21CM33-40	18.9475	0.0418171		46.4468	1.65014	0.329945	0.0262133	0.342036	693.1	18.9	137.32	2.41	3616.1	60.9		98.07	1.73		-404.733	-2533.34		n.d.	n.d.	n.d.	n.d.	n.d.	n.d.	n.d.	n.d.	n.d.	n.d.	n.d.	n.d.	n.d.	n.d.	n.d.	n.d.
21CM33-41	19.1237	0.039071		37.4436	1.51675	0.482887	0.0351951	0.381554	1037.2	22.3	169.9	3.4	4189.1	53.9		94.98	1.91		-510.477	-2365.63		n.d.	n.d.	n.d.	n.d.	n.d.	n.d.	n.d.	n.d.	n.d.	n.d.	n.d.	n.d.	n.d.	n.d.	n.d.	n.d.
21CM33-42	23.9706	0.0424112		48.9388	2.0852	0.306081	0.0248477	0.399575	631.2	17.7	130.4	2.75	3500.6	62.7		96.27	2.04		-384.049	-2584.51		n.d.	n.d.	n.d.	n.d.	n.d.	n.d.	n.d.	n.d.	n.d.	n.d.	n.d.	n.d.	n.d.	n.d.	n.d.	n.d.
21CM33-43	24.1116	0.0448447		52.51	2.10548	0.340365	0.0345162	0.458497	648.2	21.6	121.61	2.42	3663.7	77.5		85.51	1.7		-433.015	-2912.66		n.d.	n.d.	n.d.	n.d.	n.d.	n.d.	n.d.	n.d.	n.d.	n.d.	n.d.	n.d.	n.d.	n.d.	n.d.	n.d.
21CM33-44	26.4966	0.0442623		51.8182	2.30823	0.326811	0.0315416	0.562516	635.1	19	123.22	2.72	3601.5	74.1		88.35	1.95		-415.42	-2822.82		n.d.	n.d.	n.d.	n.d.	n.d.	n.d.	n.d.	n.d.	n.d.	n.d.	n.d.	n.d.	n.d.	n.d.	n.d.	n.d.
21CM33-45	27.2328	0.0446703		49.6371	2.33033	0.316442	0.0248636	0.491381	640.2	16.4	128.58	2.99	3551.9	60.5		93.57	2.18		-397.9	-2662.4		n.d.	n.d.	n.d.	n.d.	n.d.	n.d.	n.d.	n.d.	n.d.	n.d.	n.d.	n.d.	n.d.	n.d.	n.d.	n.d.
21CM33-46	27.1099	0.0445757		48.9564	2.01767	0.321764	0.0289161	0.316952	654.8	20.8	130.35	2.66	3577.6	69.1		94.16	1.93		-402.34	-2644.61		n.d.	n.d.	n.d.	n.d.	n.d.	n.d.	n.d.	n.d.	n.d.	n.d.	n.d.	n.d.	n.d.	n.d.	n.d.	n.d.
21CM33-47	25.545	0.0465312		47.0189	2.09798	0.347665	0.0304357	0.561058	713.4	18.6	135.67	3	3696.1	66.7		94.43	2.09		-425.835	-2624.33		n.d.	n.d.	n.d.	n.d.	n.d.	n.d.	n.d.	n.d.	n.d.	n.d.	n.d.	n.d.	n.d.	n.d.	n.d.	n.d.
21CM33-48	23.2264	0.0385364		47.6668	2.82883	0.416001	0.0368784	0.545455	801.9	20.8	133.84	3.93	3967.3	66.4		83.83	2.47		-499.148	-2864.21		n.d.	n.d.	n.d.	n.d.	n.d.	n.d.	n.d.	n.d.	n.d.	n.d.	n.d.	n.d.	n.d.	n.d.	n.d.	n.d.
21CM33-49	23.7257	0.037476		48.2496	2.63293	0.384616	0.0416897	0.525415	752.7	24.5	132.24	3.57	3849.3	81.8		87.06	2.36		-469.192	-2810.84		n.d.	n.d.	n.d.	n.d.	n.d.	n.d.	n.d.	n.d.	n.d.	n.d.	n.d.	n.d.	n.d.	n.d.	n.d.	n.d.
21CM33-50	21.7489	0.0357804		34.9777	1.53146	0.48959	0.036889	0.319718	1091.2	24.8	181.72	3.92	4209.5	55.6		100.39	2.18		-500.484	-2216.48		n.d.	n.d.	n.d.	n.d.	n.d.	n.d.	n.d.	n.d.	n.d.	n.d.	n.d.	n.d.	n.d.	n.d.	n.d.	n.d.
21CM33-51	19.5186	0.0360733		28.328	1.71586	0.617464	0.0423426	0.0324006	1408.6	34.3	223.64	6.66	4549	49.7		94.49	2.84		-529.852	-1934.07		n.d.	n.d.	n.d.	n.d.	n.d.	n.d.	n.d.	n.d.	n.d.	n.d.	n.d.	n.d.	n.d.	n.d.	n.d.	n.d.
21CM33-52	21.7514	0.0431875		46.2925	2.58312	0.396439	0.0298899	0.323385	791.4	21.4	137.77	3.8	3895	56.7		89.06	2.47		-474.436	-2727.18		n.d.	n.d.	n.d.	n.d.	n.d.	n.d.	n.d.	n.d.	n.d.	n.d.	n.d.	n.d.	n.d.	n.d.	n.d.	n.d.
21CM33-53	21.1769	0.041133		40.5544	1.73453	0.482483	0.0436577	0.622743	985.6	22.7	157.03	3.32	4187.9	66.9		87.79	1.86		-527.651	-2566.94		n.d.	n.d.	n.d.	n.d.	n.d.	n.d.	n.d.	n.d.	n.d.	n.d.	n.d.	n.d.	n.d.	n.d.	n.d.	n.d.
21CM33-54	19.636	0.0409383		43.6807	2.10426	0.394302	0.0380405	0.362855	820.7	25.6	145.92	3.48	3886.8	72.6		94.67	2.26		-462.431	-2563.65		n.d.	n.d.	n.d.	n.d.	n.d.	n.d.	n.d.	n.d.	n.d.	n.d.	n.d.	n.d.	n.d.	n.d.	n.d.	n.d.
21CM33-55	22.7506	0.0484112		45.6834	2.40094	0.398098	0.0421377	0.471765	801	25.9	139.59	3.63	3901.2	79.6		90	2.35		-473.823	-2694.76		n.d.	n.d.	n.d.	n.d.	n.d.	n.d.	n.d.	n.d.	n.d.	n.d.	n.d.	n.d.	n.d.	n.d.	n.d.	n.d.
21CM33-56	46.1799	0.105354		56.2357	2.17657	0.252454	0.0196635	0.321634	489	14.6	113.62	2.18	3199.5	61.6		90.05	1.73		-330.382	-2715.97		n.d.	n.d.	n.d.	n.d.	n.d.	n.d.	n.d.	n.d.	n.d.	n.d.	n.d.	n.d.	n.d.	n.d.	n.d.	n.d.
21CM33-57	37.8298	0.0930828		54.6081	2.14398	0.28663	0.02244	0.265006	552.7	16.6	116.98	2.28	3398.7	61		88.64	1.73		-372.474	-2805.37		n.d.	n.d.	n.d.	n.d.	n.d.	n.d.	n.d.	n.d.	n.d.	n.d.	n.d.	n.d.	n.d.	n.d.	n.d.	n.d.
21CM33-58	30.3942	0.0850791		49.9065	1.64747	0.34902	0.0296868	0.0417481	685.3	22.4	127.89	2.09	3702	64.8		88.82	1.46		-435.851	-2794.68		n.d.	n.d.	n.d.	n.d.	n.d.	n.d.	n.d.	n.d.	n.d.	n.d.	n.d.	n.d.	n.d.	n.d.	n.d.	n.d.
21CM33-59	36.0171	0.0851132		50.9123	2.37385	0.334465	0.0264065	0.158382	654.6	20.5	125.39	2.9	3637	60.4		88.93	2.06		-422.051	-2800.55		n.d.	n.d.	n.d.	n.d.	n.d.	n.d.	n.d.	n.d.	n.d.	n.d.	n.d.	n.d.	n.d.	n.d.	n.d.	n.d.
21CM33-60	55.6834	0.0915176		61.0545	2.86677	0.211005	0.0142038	0.208806	395.5	12.1	104.73	2.44	2912.6	54.5		87.39	2.04		-277.638	-2681.06		n.d.	n.d.	n.d.	n.d.	n.d.	n.d.	n.d.	n.d.	n.d.	n.d.	n.d.	n.d.	n.d.	n.d.	n.d.	n.d.
21CM33-61	45.0821	0.096024		53.7075	2.23197	0.250463	0.0178652	0.401009	504	13.2	118.92	2.45	3187	56.5		94.5	1.95		-323.814	-2579.95		n.d.	n.d.	n.d.	n.d.	n.d.	n.d.	n.d.	n.d.	n.d.	n.d.	n.d.	n.d.	n.d.	n.d.	n.d.	n.d.
21CM33-62	49.8122	0.120797		57.8549	2.35406	0.228357	0.0170912	0.517853	441	11.5	110.47	2.23	3039.8	60		90.25	1.82		-299.203	-2651.7		n.d.	n.d.	n.d.	n.d.	n.d.	n.d.	n.d.	n.d.	n.d.	n.d.	n.d.	n.d.	n.d.	n.d.	n.d.	n.d.
21CM33-63	51.5351	0.114256		59.0685	2.19417	0.229849	0.0217024	0.210682	436	16.6	108.22	1.99	3050.3	75.6		88.24	1.63		-302.883	-2718.61		n.d.	n.d.	n.d.	n.d.	n.d.	n.d.	n.d.	n.d.	n.d.	n.d.	n.d.	n.d.	n.d.	n.d.	n.d.	n.d.
21CM33-64	23.6353	0.0771518		47.4348	1.87738	0.350101	0.0322959	0.424169	712.5	21.4	134.49	2.63	3706.8	70.3		93.28	1.83		-429.779	-2656.19		n.d.	n.d.	n.d.	n.d.	n.d.	n.d.	n.d.	n.d.	n.d.	n.d.	n.d.	n.d.	n.d.	n.d.	n.d.	n.d.
21CM33-65	21.8268	0.0692921		48.6861	2.84408	0.353282	0.0358948	0.478271	703.8	22.8	131.07	3.79	3720.5	77.3		90.47	2.62		-436.965	-2738.56		n.d.	n.d.	n.d.	n.d.	n.d.	n.d.	n.d.	n.d.	n.d.	n.d.	n.d.	n.d.	n.d.	n.d.	n.d.	n.d.
21CM33-66	19.5265	0.0553259		48.0337	2.65681	0.360237	0.0279581	0.460542	720.7	18.5	132.83	3.64	3750.2	58.9		90.75	2.49		-442.573	-2723.31		n.d.	n.d.	n.d.	n.d.	n.d.	n.d.	n.d.	n.d.	n.d.	n.d.	n.d.	n.d.	n.d.	n.d.	n.d.	n.d.
21CM33-67	27.1989	0.0679949		50.8495	2.40197	0.354136	0.0296373	0.308346	683.2	20.5	125.54	2.94	3724.2	63.7		86.53	2.03		-444.209	-2866.54		n.d.	n.d.	n.d.	n.d.	n.d.	n.d.	n.d.	n.d.	n.d.	n.d.	n.d.	n.d.	n.d.	n.d.	n.d.	n.d.
21CM33-68	30.6817	0.0782414		50.5405	2.16504	0.335591	0.0258131	0.242086	659.8	19	126.3	2.68	3642.1	58.9		89.44	1.9		-422.407	-2783.69		n.d.	n.d.	n.d.	n.d.	n.d.	n.d.	n.d.	n.d.	n.d.	n.d.	n.d.	n.d.	n.d.	n.d.	n.d.	n.d.
21CM33-69	27.5861	0.0691137		48.886	2.12859	0.351382	0.0340192	0.423869	699	22.2	130.54	2.81	3712.3	73.7		90.35	1.95		-435.468	-2743.8		n.d.	n.d.	n.d.	n.d.	n.d.	n.d.	n.d.	n.d.	n.d.	n.d.	n.d.	n.d.	n.d.	n.d.	n.d.	n.d.
21CM33-70	26.273	0.068806		52.5522	1.86871	0.286889	0.0265395	0.292175	569.6	19.4	121.51	2.14	3400.1	72		92.06	1.63		-368.768	-2698.21		n.d.	n.d.	n.d.	n.d.	n.d.	n.d.	n.d.	n.d.	n.d.	n.d.	n.d.	n.d.	n.d.	n.d.	n.d.	n.d.
21CM33-71	22.0129	0.0606532		44.929	2.66506	0.366131	0.026565	0.661482	764.5	14.9	141.91	4.16	3774.8	55		96.13	2.83		-438.722	-2560		n.d.	n.d.	n.d.	n.d.	n.d.	n.d.	n.d.	n.d.	n.d.	n.d.	n.d.	n.d.	n.d.	n.d.	n.d.	n.d.
21CM33-72	19.7377	0.0535342		43.9472	2.25552	0.383713	0.0297842	0.422932	802.1	20.2	145.04	3.68	3845.8	58.6		95.67	2.44		-453.02	-2551.54		n.d.	n.d.	n.d.	n.d.	n.d.	n.d.	n.d.	n.d.	n.d.	n.d.	n.d.	n.d.	n.d.	n.d.	n.d.	n.d.
21CM33-73	19.7434	0.0514899		44.4927	2.34411	0.397802	0.0352766	0.570668	815.3	20.4	143.28	3.73	3900.1	66.7		92.44	2.42		-469.026	-2622.01		n.d.	n.d.	n.d.	n.d.	n.d.	n.d.	n.d.	n.d.	n.d.	n.d.	n.d.	n.d.	n.d.	n.d.	n.d.	n.d.
21CM33-74	19.5222	0.0495146		44.625	2.52577	0.388857	0.0380327	0.420346	801	25	142.86	4	3865.9	73.7		93.47	2.63		-460.689	-2606.08		n.d.	n.d.	n.d.	n.d.	n.d.	n.d.	n.d.	n.d.	n.d.	n.d.	n.d.	n.d.	n.d.	n.d.	n.d.	n.d.
21CM33-75	19.0955	0.0549312		43.4484	1.62269	0.390441	0.0376608	0.297977	818.2	26	146.69	2.71	3872	72.7		95.75	1.77		-457.775	-2539.58		n.d.	n.d.	n.d.	n.d.	n.d.	n.d.	n.d.	n.d.	n.d.	n.d.	n.d.	n.d.	n.d.	n.d.	n.d.	n.d.
21CM33-76	23.8442	0.0789768		44.9349	1.96013	0.337348	0.0308831	0.318264	721.3	22.7	141.89	3.06	3650.1	70		100.28	2.17		-408.352	-2472.49		n.d.	n.d.	n.d.	n.d.	n.d.	n.d.	n.d.	n.d.	n.d.	n.d.	n.d.	n.d.	n.d.	n.d.	n.d.	n.d.
21CM33-77	21.4364	0.0619064		44.3901	2.36741	0.38735	0.0429602	0.617319	801.8	24.5	143.61	3.79	3860	83.6		94.18	2.49		-458.318	-2587.84		n.d.	n.d.	n.d.	n.d.	n.d.	n.d.	n.d.	n.d.	n.d.	n.d.	n.d.	n.d.	n.d.	n.d.	n.d.	n.d.
21CM33-78	19.8546	0.0531646		42.7119	2.02079	0.410688	0.0296826	0.527704	856.8	18	149.19	3.49	3948	54.2		94.31	2.21		-474.301	-2546.29		n.d.	n.d.	n.d.	n.d.	n.d.	n.d.	n.d.	n.d.	n.d.	n.d.	n.d.	n.d.	n.d.	n.d.	n.d.	n.d.
21CM33-79	24.739	0.0698054		46.2975	1.93384	0.35583	0.024997	0.334737	733.4	17.9	137.76	2.85	3731.5	53.4		94.75	1.96		-432.375	-2608.7		n.d.	n.d.	n.d.	n.d.	n.d.	n.d.	n.d.	n.d.	n.d.	n.d.	n.d.	n.d.	n.d.	n.d.	n.d.	n.d.
21CM33-80	17.0761	0.0582794		40.4877	2.15716	0.440177	0.0390952	0.385705	929.7	25.6	157.28	4.14	4051.7	66.2		94.73	2.51		-491.111	-2476.11		n.d.	n.d.	n.d.	n.d.	n.d.	n.d.	n.d.	n.d.	n.d.	n.d.	n.d.	n.d.	n.d.	n.d.	n.d.	n.d.
21CM33-81	15.6709	0.046054		38.7985	1.73497	0.46617	0.0319649	0.261994	991.8	22.6	164.05	3.62	4137	50.8		94.48	2.1		-504.572	-2421.79		n.d.	n.d.	n.d.	n.d.	n.d.	n.d.	n.d.	n.d.	n.d.	n.d.	n.d.	n.d.	n.d.	n.d.	n.d.	n.d.
21CM33-82	15.188	0.0463143		38.5457	1.93518	0.450946	0.0449806	0.36932	975	29.3	165.11	4.09	4087.7	74.2		97.66	2.43		-490.515	-2375.74		n.d.	n.d.	n.d.	n.d.	n.d.	n.d.	n.d.	n.d.	n.d.	n.d.	n.d.	n.d.	n.d.	n.d.	n.d.	n.d.
21CM33-83	17.8148	0.0406465		41.8735	1.86347	0.430937	0.0390379	0.452243	896.7	24.1	152.14	3.35	4020	67.6		93.05	2.06		-489.391	-2542.3		n.d.	n.d.	n.d.	n.d.	n.d.	n.d.	n.d.	n.d.	n.d.	n.d.	n.d.	n.d.	n.d.	n.d.	n.d.	n.d.
21CM33-84	20.4459	0.0506615		44.5184	1.69856	0.40193	0.0336002	0.229773	820.8	23.5	143.2	2.7	3915.6	62.8		91.79	1.74		-473.184	-2634.36		n.d.	n.d.	n.d.	n.d.	n.d.	n.d.	n.d.	n.d.	n.d.	n.d.	n.d.	n.d.	n.d.	n.d.	n.d.	n.d.
21CM33-85	15.0904	0.0403644		40.2001	2.30889	0.502197	0.0428277	0.4652	1016.7	24.9	158.4	4.49	4247	62.8		85.37	2.44		-541.856	-2581.19		n.d.	n.d.	n.d.	n.d.	n.d.	n.d.	n.d.	n.d.	n.d.	n.d.	n.d.	n.d.	n.d.	n.d.	n.d.	n.d.
21CM33-86	15.4263	0.0406209		39.006	2.07469	0.423593	0.0402975	0.430006	929	26.4	163.18	4.29	3994.3	71.1		101.07	2.67		-469.31	-2347.79		n.d.	n.d.	n.d.	n.d.	n.d.	n.d.	n.d.	n.d.	n.d.	n.d.	n.d.	n.d.	n.d.	n.d.	n.d.	n.d.
21CM47b_47	0.318893	0.531329		1.45086	0.175285	1.10805	0.0776908	0.350056	4738.2	60	3381	163	5380.4	49		5316	225		-40.142	-59.1364		n.d.	n.d.	n.d.	n.d.	n.d.	n.d.	n.d.	n.d.	n.d.	n.d.	n.d.	n.d.	n.d.	n.d.	n.d.	n.d.
21CM47b_73	1.03266	0.625746		4.57906	0.193332	1.03227	0.0707527	0.647003	3521.1	25.7	1273.1	24	5281.4	48.1		5244.6	74.4		-176.577	-314.846		n.d.	n.d.	n.d.	n.d.	n.d.	n.d.	n.d.	n.d.	n.d.	n.d.	n.d.	n.d.	n.d.	n.d.	n.d.	n.d.
21CM47b_45	2.472	0.102349		11.3092	0.618975	0.915524	0.0602597	0.531868	2536.2	27.6	546.2	14.4	5112.4	46.5		50.34	1.37		-364.335	-835.994		n.d.	n.d.	n.d.	n.d.	n.d.	n.d.	n.d.	n.d.	n.d.	n.d.	n.d.	n.d.	n.d.	n.d.	n.d.	n.d.
21CM47b_77	2.53134	0.149613		10.0966	1.15327	0.936988	0.0599826	0.113352	2664	58.5	608.6	33.1	5145.1	45.2		42.05	2.39		-337.726	-745.399		n.d.	n.d.	n.d.	n.d.	n.d.	n.d.	n.d.	n.d.	n.d.	n.d.	n.d.	n.d.	n.d.	n.d.	n.d.	n.d.
21CM47b_33	2.70258	0.0874606		11.0221	0.644063	0.893516	0.0509552	0.382181	2537.8	29.9	559.9	15.6	5078	40.4		65.07	1.88		-353.26	-806.948		n.d.	n.d.	n.d.	n.d.	n.d.	n.d.	n.d.	n.d.	n.d.	n.d.	n.d.	n.d.	n.d.	n.d.	n.d.	n.d.
21CM47b_23	2.7369	0.17079		11.5396	0.705857	0.837064	0.04849	0.526711	2434.5	26.8	535.7	15.8	4985.6	41.1		94.88	2.9		-354.452	-830.67		n.d.	n.d.	n.d.	n.d.	n.d.	n.d.	n.d.	n.d.	n.d.	n.d.	n.d.	n.d.	n.d.	n.d.	n.d.	n.d.
21CM47b_31	2.85948	0.109906		13.2133	1.07221	0.859283	0.0600557	0.547091	2334.4	33	470.4	18.4	5022.7	49.6		71.68	2.89		-396.259	-967.751		n.d.	n.d.	n.d.	n.d.	n.d.	n.d.	n.d.	n.d.	n.d.	n.d.	n.d.	n.d.	n.d.	n.d.	n.d.	n.d.
21CM47b_79	2.9025	0.0636285		11.8912	0.60815	0.85389	0.0599849	0.315335	2425.3	33.4	520.6	12.8	5013.8	49.8		82.65	2.11		-365.866	-863.081		n.d.	n.d.	n.d.	n.d.	n.d.	n.d.	n.d.	n.d.	n.d.	n.d.	n.d.	n.d.	n.d.	n.d.	n.d.	n.d.
21CM47b_89	2.97523	0.146876		13.5412	0.614913	0.933732	0.0559717	0.464306	2387.9	25.7	459.34	9.99	5140.2	42.3		33.03	0.74		-419.855	-1019.04		n.d.	n.d.	n.d.	n.d.	n.d.	n.d.	n.d.	n.d.	n.d.	n.d.	n.d.	n.d.	n.d.	n.d.	n.d.	n.d.
21CM47b_7	3.38817	0.132214		11.6325	0.691933	0.926924	0.0560995	0.424657	2521.8	30	531.7	15.1	5129.8	42.7		42.37	1.25		-374.29	-864.792		n.d.	n.d.	n.d.	n.d.	n.d.	n.d.	n.d.	n.d.	n.d.	n.d.	n.d.	n.d.	n.d.	n.d.	n.d.	n.d.
21CM47b_101	3.41957	0.131715		16.2929	0.994659	0.843213	0.053871	0.0577442	2128.3	38.1	384.1	11.3	4995.9	45.4		64.81	1.96		-454.1	-1200.68		n.d.	n.d.	n.d.	n.d.	n.d.	n.d.	n.d.	n.d.	n.d.	n.d.	n.d.	n.d.	n.d.	n.d.	n.d.	n.d.
21CM47b_88	3.5966	0.150889		12.5793	0.697916	0.922516	0.0464974	0.458075	2444.5	25.5	493.1	13.2	5123.1	35.6		41.53	1.15		-395.741	-938.958		n.d.	n.d.	n.d.	n.d.	n.d.	n.d.	n.d.	n.d.	n.d.	n.d.	n.d.	n.d.	n.d.	n.d.	n.d.	n.d.
21CM47b_4	3.63262	0.173864		13.8271	0.857148	0.887963	0.0481581	0.451401	2322.6	28	450	13.5	5069.2	38.4		54.56	1.69		-416.133	-1026.49		n.d.	n.d.	n.d.	n.d.	n.d.	n.d.	n.d.	n.d.	n.d.	n.d.	n.d.	n.d.	n.d.	n.d.	n.d.	n.d.
21CM47b_97	3.65895	0.23601		11.6752	0.694681	0.962303	0.0666715	0.566833	2552.7	28.1	529.6	15	5182.7	48.8		21.78	0.64		-382.005	-878.606		n.d.	n.d.	n.d.	n.d.	n.d.	n.d.	n.d.	n.d.	n.d.	n.d.	n.d.	n.d.	n.d.	n.d.	n.d.	n.d.
21CM47b_68	3.69616	0.0948898		16.5843	0.799022	0.777317	0.041283	0.409268	2040.6	24.3	377.53	8.85	4880.1	37.9		90.3	2.16		-440.513	-1192.64		n.d.	n.d.	n.d.	n.d.	n.d.	n.d.	n.d.	n.d.	n.d.	n.d.	n.d.	n.d.	n.d.	n.d.	n.d.	n.d.
21CM47b_43	3.69817	0.197653		15.0742	0.583492	0.859003	0.0502196	0.480056	2214.6	23.6	414.17	7.72	5022.2	41.4		63	1.21		-434.708	-1112.59		n.d.	n.d.	n.d.	n.d.	n.d.	n.d.	n.d.	n.d.	n.d.	n.d.	n.d.	n.d.	n.d.	n.d.	n.d.	n.d.
21CM47b_92	3.82209	0.181253		10.5523	0.572819	0.941136	0.0619446	-0.199571	2627.1	43.7	583.8	15.1	5151.3	46.4		37.65	1.01		-350	-782.374		n.d.	n.d.	n.d.	n.d.	n.d.	n.d.	n.d.	n.d.	n.d.	n.d.	n.d.	n.d.	n.d.	n.d.	n.d.	n.d.
21CM47b_19	3.87977	0.105777		15.4246	0.706563	0.836844	0.0482035	0.612673	2170.5	21	405.06	9.04	4985.1	40.9		71.23	1.63		-435.847	-1130.71		n.d.	n.d.	n.d.	n.d.	n.d.	n.d.	n.d.	n.d.	n.d.	n.d.	n.d.	n.d.	n.d.	n.d.	n.d.	n.d.
21CM47b_87	3.93459	0.14946		11.1852	0.74011	0.915621	0.0519118	0.216238	2546.3	35.9	551.8	17.5	5112.5	40		50.82	1.67		-361.453	-826.513		n.d.	n.d.	n.d.	n.d.	n.d.	n.d.	n.d.	n.d.	n.d.	n.d.	n.d.	n.d.	n.d.	n.d.	n.d.	n.d.
21CM47b_24	4.0283	0.33938		16.6484	0.667058	0.771904	0.0420621	0.284953	2030.8	25.5	375.99	7.35	4870.1	38.9		92.09	1.84		-440.121	-1195.27		n.d.	n.d.	n.d.	n.d.	n.d.	n.d.	n.d.	n.d.	n.d.	n.d.	n.d.	n.d.	n.d.	n.d.	n.d.	n.d.
21CM47b_104	4.06009	0.487582		19.403	0.906901	0.778599	0.0556077	0.484762	1905.5	27.5	324.01	7.41	4882.4	50.9		76.78	1.79		-488.099	-1406.87		n.d.	n.d.	n.d.	n.d.	n.d.	n.d.	n.d.	n.d.	n.d.	n.d.	n.d.	n.d.	n.d.	n.d.	n.d.	n.d.
21CM47b_93	4.13146	0.18649		12.3796	0.741254	0.888766	0.0504559	0.598033	2425	24.1	500.7	14.4	5070.5	40.2		60.49	1.8		-384.322	-912.682		n.d.	n.d.	n.d.	n.d.	n.d.	n.d.	n.d.	n.d.	n.d.	n.d.	n.d.	n.d.	n.d.	n.d.	n.d.	n.d.
21CM47b_2	4.14519	0.275433		7.91168	0.439787	0.961343	0.0387548	0.302979	2920.6	27.8	767.4	20.1	5181.2	28.4		33	0.92		-280.584	-575.163		n.d.	n.d.	n.d.	n.d.	n.d.	n.d.	n.d.	n.d.	n.d.	n.d.	n.d.	n.d.	n.d.	n.d.	n.d.	n.d.
21CM47b_94	4.23899	0.387365		14.5612	1.49043	0.877562	0.0681197	-0.0192857	2265.1	58.8	428.2	21.2	5052.6	54.9		56.63	2.88		-428.982	-1079.96		n.d.	n.d.	n.d.	n.d.	n.d.	n.d.	n.d.	n.d.	n.d.	n.d.	n.d.	n.d.	n.d.	n.d.	n.d.	n.d.
21CM47b_100	4.30615	0.167354		18.5193	1.13752	0.872389	0.0530548	0.478139	2044.8	27.5	339	10.2	5044.2	43.1		46.44	1.42		-503.186	-1387.96		n.d.	n.d.	n.d.	n.d.	n.d.	n.d.	n.d.	n.d.	n.d.	n.d.	n.d.	n.d.	n.d.	n.d.	n.d.	n.d.
21CM47b_84	4.34756	0.303986		10.1128	0.576389	0.897646	0.0372984	-0.221114	2622.7	36.6	608	16.6	5084.5	29.4		68.18	1.95		-331.365	-736.266		n.d.	n.d.	n.d.	n.d.	n.d.	n.d.	n.d.	n.d.	n.d.	n.d.	n.d.	n.d.	n.d.	n.d.	n.d.	n.d.
21CM47b_85	4.37485	0.0859708		11.7605	0.538944	0.895331	0.0502414	0.166915	2479.2	30.7	526.1	11.6	5080.8	39.7		59.96	1.37		-371.241	-865.748		n.d.	n.d.	n.d.	n.d.	n.d.	n.d.	n.d.	n.d.	n.d.	n.d.	n.d.	n.d.	n.d.	n.d.	n.d.	n.d.
21CM47b_99	4.44353	0.132926		18.8943	0.784024	0.864814	0.0505858	0.472003	2019.8	23.4	332.53	6.69	5031.8	41.5		48.23	0.99		-507.404	-1413.19		n.d.	n.d.	n.d.	n.d.	n.d.	n.d.	n.d.	n.d.	n.d.	n.d.	n.d.	n.d.	n.d.	n.d.	n.d.	n.d.
21CM47b_105	4.58585	0.117695		20.3065	1.20189	0.82567	0.0407662	0.00379676	1916.6	33.2	309.83	8.94	4966.1	35.1		57.8	1.7		-518.597	-1502.85		n.d.	n.d.	n.d.	n.d.	n.d.	n.d.	n.d.	n.d.	n.d.	n.d.	n.d.	n.d.	n.d.	n.d.	n.d.	n.d.
21CM47b_17	4.59723	0.217979		12.3551	0.752191	0.895191	0.0438898	0.0740374	2433.1	34.7	501.5	14.6	5080.7	34.7		57.11	1.73		-385.165	-913.101		n.d.	n.d.	n.d.	n.d.	n.d.	n.d.	n.d.	n.d.	n.d.	n.d.	n.d.	n.d.	n.d.	n.d.	n.d.	n.d.
21CM47b_67	4.62127	0.23601		21.7585	0.997284	0.687022	0.0368954	0.398248	1703.1	22.7	289.65	6.51	4703.1	38.6		96.67	2.2		-487.985	-1523.72		n.d.	n.d.	n.d.	n.d.	n.d.	n.d.	n.d.	n.d.	n.d.	n.d.	n.d.	n.d.	n.d.	n.d.	n.d.	n.d.
21CM47b_102	4.6305	0.139732		18.6308	0.747	0.802242	0.0427521	0.408354	1966.3	22.6	337.06	6.61	4925	38		71.46	1.43		-483.368	-1361.16		n.d.	n.d.	n.d.	n.d.	n.d.	n.d.	n.d.	n.d.	n.d.	n.d.	n.d.	n.d.	n.d.	n.d.	n.d.	n.d.
21CM47b_103	4.70982	0.299925		21.4173	1.06436	0.77952	0.054074	0.629613	1821.9	22.9	294.14	7.11	4884.1	49.5		69.29	1.71		-519.399	-1560.47		n.d.	n.d.	n.d.	n.d.	n.d.	n.d.	n.d.	n.d.	n.d.	n.d.	n.d.	n.d.	n.d.	n.d.	n.d.	n.d.
21CM47b_6	4.80394	0.209282		7.95911	0.277431	0.962349	0.0326704	0.478489	2915.5	16.9	762.9	12.7	5182.7	23.9		31.95	0.56		-282.16	-579.342		n.d.	n.d.	n.d.	n.d.	n.d.	n.d.	n.d.	n.d.	n.d.	n.d.	n.d.	n.d.	n.d.	n.d.	n.d.	n.d.
21CM47b_80	4.94503	0.131437		9.77478	0.73335	0.939697	0.0522615	0.313736	2698	36.9	628.2	22.4	5149.2	39.2		41.61	1.55		-329.481	-719.675		n.d.	n.d.	n.d.	n.d.	n.d.	n.d.	n.d.	n.d.	n.d.	n.d.	n.d.	n.d.	n.d.	n.d.	n.d.	n.d.
21CM47b_98	4.94608	0.289099		15.6761	0.831071	0.876955	0.0528947	0.427087	2197.6	27.3	398.5	10.2	5051.6	42.7		52.85	1.39		-451.468	-1167.65		n.d.	n.d.	n.d.	n.d.	n.d.	n.d.	n.d.	n.d.	n.d.	n.d.	n.d.	n.d.	n.d.	n.d.	n.d.	n.d.
21CM47b_96	5.0096	0.136697		17.0587	0.993397	0.825051	0.0600879	0.495948	2068.1	29.4	367.2	10.4	4965.1	51.8		69.01	1.99		-463.208	-1252.15		n.d.	n.d.	n.d.	n.d.	n.d.	n.d.	n.d.	n.d.	n.d.	n.d.	n.d.	n.d.	n.d.	n.d.	n.d.	n.d.
21CM47b_74	5.07229	0.189044		13.3727	0.734837	0.878763	0.055259	0.240494	2343.9	33.3	465	12.2	5054.5	44.6		61.05	1.66		-404.065	-986.989		n.d.	n.d.	n.d.	n.d.	n.d.	n.d.	n.d.	n.d.	n.d.	n.d.	n.d.	n.d.	n.d.	n.d.	n.d.	n.d.
21CM47b_60	5.0943	0.100702		11.2356	0.721986	0.827957	0.0407294	0.0256535	2448.8	36.8	549.4	16.9	4970	34.9		102.81	3.27		-345.723	-804.623		n.d.	n.d.	n.d.	n.d.	n.d.	n.d.	n.d.	n.d.	n.d.	n.d.	n.d.	n.d.	n.d.	n.d.	n.d.	n.d.
21CM47b_78	5.20878	0.268325		8.57962	0.467793	0.917583	0.0453835	0.274957	2798.5	30	710.7	18.4	5115.6	34.9		64.66	1.76		-293.767	-619.797		n.d.	n.d.	n.d.	n.d.	n.d.	n.d.	n.d.	n.d.	n.d.	n.d.	n.d.	n.d.	n.d.	n.d.	n.d.	n.d.
21CM47b_90	5.23444	0.296519		10.3767	0.446584	0.94692	0.0506327	0.372252	2648.1	25.8	592.9	12.3	5159.9	37.7		34.5	0.75		-346.635	-770.282		n.d.	n.d.	n.d.	n.d.	n.d.	n.d.	n.d.	n.d.	n.d.	n.d.	n.d.	n.d.	n.d.	n.d.	n.d.	n.d.
21CM47b_56	5.3038	0.198394		11.6377	1.468	0.864681	0.0442501	-0.261223	2456.5	68.5	531.3	32.2	5031.6	36.3		78.2	4.91		-362.356	-847.036		n.d.	n.d.	n.d.	n.d.	n.d.	n.d.	n.d.	n.d.	n.d.	n.d.	n.d.	n.d.	n.d.	n.d.	n.d.	n.d.
21CM47b_21	5.36024	0.381027		13.3427	1.00291	0.905951	0.0443384	-0.0183859	2373.9	41.4	466	16.8	5097.6	34.6		47.49	1.77		-409.421	-993.906		n.d.	n.d.	n.d.	n.d.	n.d.	n.d.	n.d.	n.d.	n.d.	n.d.	n.d.	n.d.	n.d.	n.d.	n.d.	n.d.
21CM47b_86	5.39885	0.324239		17.8681	0.800309	0.794436	0.0479124	0.268113	1994	28.2	351.01	7.65	4911.1	43		77.41	1.72		-468.075	-1299.13		n.d.	n.d.	n.d.	n.d.	n.d.	n.d.	n.d.	n.d.	n.d.	n.d.	n.d.	n.d.	n.d.	n.d.	n.d.	n.d.
21CM47b_70	5.408	0.223496		15.0121	0.717801	0.82242	0.0425526	0.371123	2179.1	25.1	415.77	9.66	4960.4	36.8		79.6	1.9		-424.112	-1093.06		n.d.	n.d.	n.d.	n.d.	n.d.	n.d.	n.d.	n.d.	n.d.	n.d.	n.d.	n.d.	n.d.	n.d.	n.d.	n.d.
21CM47b_76	5.81324	0.21323		18.356	0.848673	0.779616	0.0412145	0.489108	1954.1	21.8	341.88	7.71	4884.3	37.7		80.75	1.86		-471.575	-1328.66		n.d.	n.d.	n.d.	n.d.	n.d.	n.d.	n.d.	n.d.	n.d.	n.d.	n.d.	n.d.	n.d.	n.d.	n.d.	n.d.
21CM47b_8	6.00681	0.508301		12.742	0.769164	0.926458	0.0311691	0.0818458	2436.9	30.8	487.1	14.2	5129.2	23.8		38.9	1.17		-400.287	-953.008		n.d.	n.d.	n.d.	n.d.	n.d.	n.d.	n.d.	n.d.	n.d.	n.d.	n.d.	n.d.	n.d.	n.d.	n.d.	n.d.
21CM47b_50	6.31995	0.257263		17.3698	0.82813	0.805862	0.0452495	0.528944	2031.5	22.3	360.83	8.38	4931.6	39.9		75.19	1.79		-463.008	-1266.74		n.d.	n.d.	n.d.	n.d.	n.d.	n.d.	n.d.	n.d.	n.d.	n.d.	n.d.	n.d.	n.d.	n.d.	n.d.	n.d.
21CM47b_18	6.39615	0.249034		20.5905	1.15165	0.799431	0.0438739	0.0962897	1877	31.8	305.72	8.34	4920	39.1		65.59	1.82		-513.96	-1509.32		n.d.	n.d.	n.d.	n.d.	n.d.	n.d.	n.d.	n.d.	n.d.	n.d.	n.d.	n.d.	n.d.	n.d.	n.d.	n.d.
21CM47b_1	6.49397	0.155295		18.0285	1.20091	0.801843	0.0402004	-0.169302	1994.4	39.2	348	11.3	4924.3	35.7		73.97	2.45		-473.103	-1315.03		n.d.	n.d.	n.d.	n.d.	n.d.	n.d.	n.d.	n.d.	n.d.	n.d.	n.d.	n.d.	n.d.	n.d.	n.d.	n.d.
21CM47b_61	6.59231	0.263387		11.8361	0.539791	0.787436	0.0327345	0.287883	2354.7	23.8	522.7	11.4	4898.5	29.6		120.51	2.72		-350.488	-837.153		n.d.	n.d.	n.d.	n.d.	n.d.	n.d.	n.d.	n.d.	n.d.	n.d.	n.d.	n.d.	n.d.	n.d.	n.d.	n.d.
21CM47b_25	6.66861	0.0604738		19.9294	1.37008	0.751629	0.0418112	0.228922	1852.2	33.1	315.6	10.6	4832	39.8		83.82	2.86		-486.882	-1431.05		n.d.	n.d.	n.d.	n.d.	n.d.	n.d.	n.d.	n.d.	n.d.	n.d.	n.d.	n.d.	n.d.	n.d.	n.d.	n.d.
21CM47b_71	6.67908	0.28584		23.617	1.93529	0.79662	0.0513769	0.211543	1757.9	38.9	267.3	10.8	4915	46		58	2.37		-557.651	-1738.76		n.d.	n.d.	n.d.	n.d.	n.d.	n.d.	n.d.	n.d.	n.d.	n.d.	n.d.	n.d.	n.d.	n.d.	n.d.	n.d.
21CM47b_9	7.37822	0.184482		16.1044	1.12414	0.807361	0.0488286	-0.250368	2100.1	45.7	388.5	13.1	4934.2	43		80.47	2.78		-440.566	-1170.06		n.d.	n.d.	n.d.	n.d.	n.d.	n.d.	n.d.	n.d.	n.d.	n.d.	n.d.	n.d.	n.d.	n.d.	n.d.	n.d.
21CM47b_65	7.41951	0.323769		23.4119	1.31522	0.635972	0.0350081	0.413158	1580.9	24.3	269.65	7.45	4591.8	39.8		104.45	2.92		-486.279	-1602.87		n.d.	n.d.	n.d.	n.d.	n.d.	n.d.	n.d.	n.d.	n.d.	n.d.	n.d.	n.d.	n.d.	n.d.	n.d.	n.d.
21CM47b_37	7.94196	0.217775		25.9512	0.994962	0.723629	0.0391828	0.221517	1601.8	23.8	243.75	4.56	4777.7	38.8		71.68	1.36		-557.149	-1860.08		n.d.	n.d.	n.d.	n.d.	n.d.	n.d.	n.d.	n.d.	n.d.	n.d.	n.d.	n.d.	n.d.	n.d.	n.d.	n.d.
21CM47b_27	8.00434	0.338005		24.9712	1.19429	0.654757	0.0327586	0.173453	1552.6	25.1	253.13	5.91	4633.9	36.2		92.93	2.2		-513.361	-1730.64		n.d.	n.d.	n.d.	n.d.	n.d.	n.d.	n.d.	n.d.	n.d.	n.d.	n.d.	n.d.	n.d.	n.d.	n.d.	n.d.
21CM47b_15	8.79317	0.350936		16.0522	0.95633	0.874356	0.0348588	0.126275	2174	30.2	389.6	11.3	5047.4	28.3		52.72	1.57		-458.008	-1195.53		n.d.	n.d.	n.d.	n.d.	n.d.	n.d.	n.d.	n.d.	n.d.	n.d.	n.d.	n.d.	n.d.	n.d.	n.d.	n.d.
21CM47b_72	9.07411	0.333311		28.6915	1.43898	0.666538	0.0401153	-0.122496	1457.6	32.1	220.86	5.45	4659.5	43.4		78.2	1.95		-559.966	-2009.71		n.d.	n.d.	n.d.	n.d.	n.d.	n.d.	n.d.	n.d.	n.d.	n.d.	n.d.	n.d.	n.d.	n.d.	n.d.	n.d.
21CM47b_83	9.20165	0.0543034		16.0676	0.879826	0.843588	0.0328201	0.198731	2140.8	27	389.2	10.3	4996.6	27.6		65.52	1.78		-450.051	-1183.81		n.d.	n.d.	n.d.	n.d.	n.d.	n.d.	n.d.	n.d.	n.d.	n.d.	n.d.	n.d.	n.d.	n.d.	n.d.	n.d.
21CM47b_91	9.74358	0.391007		24.3817	1.5531	0.727356	0.0382481	0.232733	1656.7	29.6	259.14	8.07	4785.2	37.6		75.24	2.38		-539.307	-1746.57		n.d.	n.d.	n.d.	n.d.	n.d.	n.d.	n.d.	n.d.	n.d.	n.d.	n.d.	n.d.	n.d.	n.d.	n.d.	n.d.
21CM47b_40	10.8128	0.420351		32.0202	1.34513	0.666279	0.0359136	0.103657	1373.5	24.5	198.24	4.12	4659	38.8		70.14	1.47		-592.847	-2250.18		n.d.	n.d.	n.d.	n.d.	n.d.	n.d.	n.d.	n.d.	n.d.	n.d.	n.d.	n.d.	n.d.	n.d.	n.d.	n.d.
21CM47b_39	10.9794	0.396942		31.1573	1.35146	0.661024	0.033955	0.334704	1388	20.9	203.63	4.34	4647.5	37.1		73.21	1.58		-581.628	-2182.33		n.d.	n.d.	n.d.	n.d.	n.d.	n.d.	n.d.	n.d.	n.d.	n.d.	n.d.	n.d.	n.d.	n.d.	n.d.	n.d.
21CM47b_5	11.9143	0.343864		27.6302	1.71003	0.692226	0.0384146	-0.0420153	1516.5	33.4	229.19	6.97	4714	39.9		74.96	2.31		-561.678	-1956.81		n.d.	n.d.	n.d.	n.d.	n.d.	n.d.	n.d.	n.d.	n.d.	n.d.	n.d.	n.d.	n.d.	n.d.	n.d.	n.d.
21CM47b_11	12.9651	0.553363		28.1895	2.15209	0.664141	0.0421588	-0.3811	1468.4	45.2	224.71	8.42	4654.3	45.8		80.15	3.04		-553.464	-1971.25		n.d.	n.d.	n.d.	n.d.	n.d.	n.d.	n.d.	n.d.	n.d.	n.d.	n.d.	n.d.	n.d.	n.d.	n.d.	n.d.
21CM47b_32	14.7602	0.310198		34.1495	2.44608	0.548355	0.0400817	-0.556007	1185.2	44.7	186.06	6.58	4376.2	53.5		88.91	3.17		-536.999	-2252.04		n.d.	n.d.	n.d.	n.d.	n.d.	n.d.	n.d.	n.d.	n.d.	n.d.	n.d.	n.d.	n.d.	n.d.	n.d.	n.d.
21CM47b_3	15.8641	0.397831		40.6733	1.98963	0.577569	0.0419968	-0.253385	1101	32.7	156.59	3.78	4452	53		69.91	1.7		-603.11	-2743.09		n.d.	n.d.	n.d.	n.d.	n.d.	n.d.	n.d.	n.d.	n.d.	n.d.	n.d.	n.d.	n.d.	n.d.	n.d.	n.d.
21CM47b_38	18.2862	0.98046		39.6497	1.71888	0.604119	0.0346221	-0.0786322	1148.7	25.6	160.57	3.44	4517.2	41.6		67.22	1.45		-615.389	-2713.23		n.d.	n.d.	n.d.	n.d.	n.d.	n.d.	n.d.	n.d.	n.d.	n.d.	n.d.	n.d.	n.d.	n.d.	n.d.	n.d.
21MP15b-B-1	53.6059	0.00210106		14.5805	0.448603	0.81364	0.0187486	0.245679	2195.5	15.1	427.64	6.39	4945.1	16.4		85.97	1.32		-413.399	-1056.37		n.d.	n.d.	n.d.	n.d.	n.d.	n.d.	n.d.	n.d.	n.d.	n.d.	n.d.	n.d.	n.d.	n.d.	n.d.	n.d.
21MP15b-B-2	41.5536	0.00245409		12.6185	0.431449	0.843509	0.0198464	0.232491	2359.3	16.8	491.58	8.06	4996.4	16.7		83.4	1.41		-379.942	-916.396		n.d.	n.d.	n.d.	n.d.	n.d.	n.d.	n.d.	n.d.	n.d.	n.d.	n.d.	n.d.	n.d.	n.d.	n.d.	n.d.
21MP15b-B-3	40.2931	0.00215512		14.2685	0.658421	0.843255	0.0226284	-0.214662	2247.2	26.3	436.62	9.76	4996	19		73.89	1.7		-414.681	-1044.24		n.d.	n.d.	n.d.	n.d.	n.d.	n.d.	n.d.	n.d.	n.d.	n.d.	n.d.	n.d.	n.d.	n.d.	n.d.	n.d.
21MP15b-B-4	50.5061	0.00243241		13.2278	0.916938	0.875282	0.0268139	0.103459	2349.9	33.5	469.7	15.8	5048.9	21.7		63.46	2.2		-400.298	-974.92		n.d.	n.d.	n.d.	n.d.	n.d.	n.d.	n.d.	n.d.	n.d.	n.d.	n.d.	n.d.	n.d.	n.d.	n.d.	n.d.
21MP15b-B-5	65.6278	0.00279284		18.0527	0.708937	0.80669	0.0203817	0.346283	1998.7	16.9	347.6	6.66	4933	18		72.07	1.41		-475	-1319.16		n.d.	n.d.	n.d.	n.d.	n.d.	n.d.	n.d.	n.d.	n.d.	n.d.	n.d.	n.d.	n.d.	n.d.	n.d.	n.d.
21MP15b-B-6	114.445	0.00598116		20.6177	0.7249	0.792137	0.0199369	0.42808	1867.9	14.1	305.28	5.21	4907	17.9		67.87	1.18		-511.865	-1507.38		n.d.	n.d.	n.d.	n.d.	n.d.	n.d.	n.d.	n.d.	n.d.	n.d.	n.d.	n.d.	n.d.	n.d.	n.d.	n.d.
21MP15b-B-7	187.505	0.00853769		30.988	1.02629	0.670152	0.0172594	0.54569	1402.7	10.9	204.73	3.35	4667.5	18.6		71.62	1.18		-585.146	-2179.83		n.d.	n.d.	n.d.	n.d.	n.d.	n.d.	n.d.	n.d.	n.d.	n.d.	n.d.	n.d.	n.d.	n.d.	n.d.	n.d.
21MP15b-B-8	43.4349	0.00230838		15.07	0.466179	0.846538	0.021582	0.259538	2201.4	15.6	414.17	6.26	5001.4	18.1		68.56	1.06		-431.521	-1107.57		n.d.	n.d.	n.d.	n.d.	n.d.	n.d.	n.d.	n.d.	n.d.	n.d.	n.d.	n.d.	n.d.	n.d.	n.d.	n.d.
21MP15b-B-8	68.0523	0.00312184		18.0103	0.871987	0.789277	0.0212786	0.336879	1981.6	20.3	348.35	8.19	4901.9	19.2		78.7	1.89		-468.853	-1307.18		n.d.	n.d.	n.d.	n.d.	n.d.	n.d.	n.d.	n.d.	n.d.	n.d.	n.d.	n.d.	n.d.	n.d.	n.d.	n.d.
21MP15b-C-1	160.223	0.270536		71.5259	2.27387	0.200181	0.00495592	0.361598	331.24	4.6	89.5	1.41	2827.1	20.4		75.24	1.19		-270.101	-3058.77		n.d.	n.d.	n.d.	n.d.	n.d.	n.d.	n.d.	n.d.	n.d.	n.d.	n.d.	n.d.	n.d.	n.d.	n.d.	n.d.
21MP15b-C-2	140.354	0.212265		71.9332	1.86327	0.225038	0.00527617	0.185607	363.96	4.82	89	1.14	3016.1	18.9		72.51	0.93		-308.944	-3288.88		n.d.	n.d.	n.d.	n.d.	n.d.	n.d.	n.d.	n.d.	n.d.	n.d.	n.d.	n.d.	n.d.	n.d.	n.d.	n.d.
21MP15b-D-3	7.53422	0.336048		19.0759	2.89804	0.862869	0.0602063	-0.717979	2009.1	91	329.3	24.4	5028.6	49.4		48.42	3.67		-510.112	-1427.06		n.d.	n.d.	n.d.	n.d.	n.d.	n.d.	n.d.	n.d.	n.d.	n.d.	n.d.	n.d.	n.d.	n.d.	n.d.	n.d.
21MP15b-E-1	52.1188	0.138502		59.8093	1.73725	0.278021	0.00807668	0.352182	502.67	6.58	106.89	1.54	3351	22.8		81.2	1.17		-370.269	-3035		n.d.	n.d.	n.d.	n.d.	n.d.	n.d.	n.d.	n.d.	n.d.	n.d.	n.d.	n.d.	n.d.	n.d.	n.d.	n.d.
21MP15b-E-2	54.971	0.160648		61.1573	1.88645	0.270617	0.00743122	0.322311	483.42	6.56	104.55	1.6	3308.8	21.4		80.22	1.23		-362.382	-3064.8		n.d.	n.d.	n.d.	n.d.	n.d.	n.d.	n.d.	n.d.	n.d.	n.d.	n.d.	n.d.	n.d.	n.d.	n.d.	n.d.
21MP15b-E-3	65.6072	0.142534		50.0521	1.9374	0.36612	0.0119474	0.548257	707.91	8.73	127.53	2.45	3774.7	24.6		85.17	1.64		-455.093	-2859.85		n.d.	n.d.	n.d.	n.d.	n.d.	n.d.	n.d.	n.d.	n.d.	n.d.	n.d.	n.d.	n.d.	n.d.	n.d.	n.d.
21MP16b-34	368.967	1.28551		59.0164	3.59012	0.100101	0.00260842	0.312997	213.28	5.6	108.31	3.27	1625.1	24.2		101.16	3.05		-96.9163	-1400.42		359.29	18.3608	501.399	35.0946	2332.15	143.111	635.599	38.8788	706.393	49.0221	360.219	21.3026	357.264	27.5446	377.369	38.419						747.265	748.742	16.6338
21MP16b-35	251.455	1.66216		44.2327	6.05065	0.410963	0.0574321	-0.0419962	837.1	56.8	144.12	9.75	3949	105		77.58	5.27		-480.835	-2640.08		428.799	57.9961	599.046	92.2768	3176.26	552.823	951.184	197.289	1033.94	207.064	551.722	119.036	301.059	55.5197	385.282	57.2989						757.009
21MP16b-36	180.395	0.638465		58.5929	3.23507	0.174549	0.00978728	0.278918	349.21	9.88	109.1	2.99	2600.5	46.8		91.56	2.51		-220.082	-2283.59		504.302	58.4301	1107.07	116.627	4370.57	462.824	1018.93	112.908	935.339	90.1115	487.251	50.8637	328.525	32.816	169.678	18.4834						766.109
21MP16b-37	193.38	0.789095		14.9085	1.8579	0.687457	0.0532891	-0.0994231	2026	67.3	418.5	25.3	4704.2	55.8		78.27	4.85		-384.11	-1024.06		524.909	63.0349	810.057	81.9842	4305.11	435.224	1289.75	188.633	1218.19	161.564	550.154	68.9046	361.953	47.7006	219.541	26.1062						768.381
21MP16b-40	40.9763	2.3609		33.6721	2.05661	0.526534	0.0170067	0.158128	1166.7	22.3	188.67	5.69	4316.5	23.7		73.84	2.25		-518.381	-2187.86		n.d.	n.d.	n.d.	n.d.	n.d.	n.d.	n.d.	n.d.	n.d.	n.d.	n.d.	n.d.	n.d.	n.d.	n.d.	n.d.
21MP16b-41	290.694	4.64297		76.8967	4.94314	0.162448	0.0184075	0.0620714	259.4	14.5	83.29	2.66	2480	95.5		71.12	2.27		-211.442	-2877.55		201.318	25.5564	200.8	23.9347	968.144	95.4941	236.453	29.0105	185.522	27.835	132.766	20.9079	74.5354	10.0546	263.692	23.186						716.605
21MP16b-43	376.518	1.68338		76.1976	4.60116	0.142249	0.011734	0.355591	232.4	8.59	84.05	2.52	2253.4	71		73.94	2.22		-176.502	-2581.02		363.091	59.2891	626.282	69.8852	1910.44	285.06	398.626	56.5251	348.658	48.6413	266.923	42.1598	295.523	34.0061	380.411	37.6596						747.84
21MP16b-46	136.212	0.545278		6.61048	0.821839	0.761429	0.0348385	-0.364182	2869.3	70.1	908.2	52.5	4850.5	32.7		84.96	5.24		-215.933	-434.078		454.604	33.4728	1164.09	97.1305	4840.08	343.047	1135.43	81.1243	934.303	71.0738	440.388	32.893	513.44	45.1781	215.986	14.2438						760.27
21MP16b-47	272.681	1.31369		32.0903	2.37738	0.519594	0.0382326	-0.284152	1191	41.4	197.82	7.22	4297.1	54		79.21	2.92		-502.062	-2072.23		370.779	42.5499	768.555	80.1364	3433.15	332.285	817.997	90.8695	730.188	78.0051	452.666	58.2921	339.613	30.6372	352.732	30.9696						748.986
21MP16b-48	336.179	4.15473		82.2273	5.47978	0.116647	0.00682445	0.209559	181.25	6.54	77.92	2.58	1903.9	52.4		71.07	2.36		-132.61	-2343.4		244.469	27.8451	304.846	26.1934	1247.12	120.615	267.291	27.3113	204.877	23.543	144.914	13.1787	125.743	9.84409	407.243	34.4385						726.677
21MP16b-49	251.744	3.017		73.4032	6.44376	0.160468	0.0181053	0.26544	267.5	14.4	87.23	3.8	2460.2	95.3		74.71	3.26		-206.661	-2720.36		230.497	22.1374	305.753	31.5656	1474.76	163.934	375.293	40.492	262.116	30.2602	151.452	17.2097	130.346	16.4913	302.589	32.4448						723.603
21MP16b-56	149.386	0.511938		40.2009	2.98445	0.434047	0.0274399	-0.612802	925.5	37.4	158.4	5.8	4030.6	47.1		80.66	2.97		-484.28	-2444.57		464.289	26.2334	1172.38	91.6908	4862.76	335.892	1162.6	73.6055	1023.9	66.0172	521.54	35.1313	476.83	29.1091	200.499	12.1173						761.451
21MP16b-57	802.155	1.59159		77.944	3.48218	0.0977126	0.00925976	-0.306201	161.81	8.75	82.18	1.82	1579.8	89		76.95	1.71		-96.8971	-1822.37		447.631	34.3254	993.024	64.6123	4045.99	272.452	887.194	72.9128	752.241	66.7951	447.221	35.6503	762.463	51.0342	1004.01	68.8134						759.405
21MP16b-58	227.341	0.771842		52.4758	3.02192	0.342397	0.0198222	-0.323495	651.3	22.5	121.68	3.47	3672.8	44.2		76.1	2.18		-435.256	-2918.41		378.034	27.9356	845.747	61.2582	2595.88	187.15	592.245	36.4281	578.89	41.6436	422.907	27.785	418.416	20.6153	272.948	16.9656						750.048
21MP16b-A-1	573.12	0.734993		40.8076	5.01468	0.445245	0.0531026	-0.901562	931.8	71.9	156.06	9.46	4068.6	88.8		77.22	4.71		-497.078	-2507.07		n.d.	n.d.	n.d.	n.d.	n.d.	n.d.	n.d.	n.d.	n.d.	n.d.	n.d.	n.d.	n.d.	n.d.	n.d.	n.d.
21MP16b-A-2	962.976	0.583094		74.7144	2.8824	0.102488	0.00294122	0.574951	175.85	2.61	85.71	1.64	1669	26.2		79.74	1.53		-105.169	-1847.26		n.d.	n.d.	n.d.	n.d.	n.d.	n.d.	n.d.	n.d.	n.d.	n.d.	n.d.	n.d.	n.d.	n.d.	n.d.	n.d.
21MP16b-A-3	445.395	0.210121		65.3413	3.92376	0.238892	0.0368103	-0.79538	414.3	34.9	97.91	2.91	3112	123		74.1	2.21		-323.144	-3078.43		n.d.	n.d.	n.d.	n.d.	n.d.	n.d.	n.d.	n.d.	n.d.	n.d.	n.d.	n.d.	n.d.	n.d.	n.d.	n.d.
21MP16b-A-4	926.249	0.344149		65.2813	4.43517	0.189614	0.0314374	-0.534216	341.9	30.4	98	3.31	2738	136		80.33	2.71		-248.878	-2693.88		n.d.	n.d.	n.d.	n.d.	n.d.	n.d.	n.d.	n.d.	n.d.	n.d.	n.d.	n.d.	n.d.	n.d.	n.d.	n.d.
21MP16b-A-5	722.53	3.15745		64.2141	4.07526	0.311991	0.0346643	-0.665842	520.5	32.8	99.62	3.14	3530.1	85.8		66.11	2.09		-422.485	-3443.57		n.d.	n.d.	n.d.	n.d.	n.d.	n.d.	n.d.	n.d.	n.d.	n.d.	n.d.	n.d.	n.d.	n.d.	n.d.	n.d.
21MP16b-B-1	2913.18	0.559565		44.0429	2.82076	0.400075	0.0254058	-0.67143	824.3	32.9	144.74	4.58	3908.8	47.7		79.93	2.54		-469.504	-2600.57		n.d.	n.d.	n.d.	n.d.	n.d.	n.d.	n.d.	n.d.	n.d.	n.d.	n.d.	n.d.	n.d.	n.d.	n.d.	n.d.
21MP16b-B-2	2295.51	0.259234		76.4837	2.36493	0.151457	0.00717629	-0.119815	245.09	6.5	83.74	1.28	2362.2	40.6		72.67	1.11		-192.68	-2720.87		n.d.	n.d.	n.d.	n.d.	n.d.	n.d.	n.d.	n.d.	n.d.	n.d.	n.d.	n.d.	n.d.	n.d.	n.d.	n.d.
21MP16b-B-3	12671.3	0.839623		82.2944	2.73686	0.0755875	0.00189826	0.507044	121.05	1.7	77.87	1.29	1083.6	25.2		75.09	1.24		-55.4514	-1291.55		n.d.	n.d.	n.d.	n.d.	n.d.	n.d.	n.d.	n.d.	n.d.	n.d.	n.d.	n.d.	n.d.	n.d.	n.d.	n.d.
21MP16b-B-4	20398.2	1.02721		87.1192	3.22008	0.0883109	0.00205822	0.59408	132.76	1.86	73.57	1.35	1388.2	22.8		69.75	1.28		-80.454	-1786.91		n.d.	n.d.	n.d.	n.d.	n.d.	n.d.	n.d.	n.d.	n.d.	n.d.	n.d.	n.d.	n.d.	n.d.	n.d.	n.d.
21MP16b-C-1	29676.7	0.911015		57.0895	3.91369	0.304792	0.0256521	-0.481714	560	28.3	111.94	3.8	3494.1	65.2		75.35	2.57		-400.268	-3021.4		n.d.	n.d.	n.d.	n.d.	n.d.	n.d.	n.d.	n.d.	n.d.	n.d.	n.d.	n.d.	n.d.	n.d.	n.d.	n.d.
21MP16b-C-2	529.006	0.204593		69.5254	3.60412	0.162768	0.00890114	0.605902	283.97	5.83	92.05	2.37	2484.2	46.1		78.58	2.02		-208.495	-2598.75		n.d.	n.d.	n.d.	n.d.	n.d.	n.d.	n.d.	n.d.	n.d.	n.d.	n.d.	n.d.	n.d.	n.d.	n.d.	n.d.
21MP16b-C-3	320.914	0.240266		65.639	3.40289	0.186717	0.0112684	0.643613	335.83	6.91	97.47	2.51	2712.6	49.9		80.25	2.07		-244.547	-2683.01		n.d.	n.d.	n.d.	n.d.	n.d.	n.d.	n.d.	n.d.	n.d.	n.d.	n.d.	n.d.	n.d.	n.d.	n.d.	n.d.
21MP16b-C-4	195.8	0.143065		9.40951	1.70586	0.747963	0.0408649	-0.238942	2519.3	94	651	56.3	4825.2	39.1		71.39	6.45		-286.989	-641.198		n.d.	n.d.	n.d.	n.d.	n.d.	n.d.	n.d.	n.d.	n.d.	n.d.	n.d.	n.d.	n.d.	n.d.	n.d.	n.d.
21MP16b-C-5	326.074	0.314858		33.7231	2.43554	0.0945861	0.0047158	0.552187	331.91	8.67	188.39	6.72	1519.3	46.8		177.69	6.34		-76.1824	-706.465		n.d.	n.d.	n.d.	n.d.	n.d.	n.d.	n.d.	n.d.	n.d.	n.d.	n.d.	n.d.	n.d.	n.d.	n.d.	n.d.
21MP16b-C-6	322.666	0.225431		61.9168	3.85762	0.147091	0.00702505	0.342294	287.58	8.05	103.28	3.19	2311.7	40.8		90.26	2.79		-178.447	-2138.28		n.d.	n.d.	n.d.	n.d.	n.d.	n.d.	n.d.	n.d.	n.d.	n.d.	n.d.	n.d.	n.d.	n.d.	n.d.	n.d.
21MP16b-D-1	290.504	0.295458		35.3144	4.55132	0.437663	0.0577951	-0.880737	1011.7	81	180	11.4	4043.3	98.5		90.93	5.82		-462.056	-2146.28		n.d.	n.d.	n.d.	n.d.	n.d.	n.d.	n.d.	n.d.	n.d.	n.d.	n.d.	n.d.	n.d.	n.d.	n.d.	n.d.
21MP16b-D-2	126.118	0.406706		36.9903	3.07332	0.165506	0.00775503	0.289506	487.7	16	171.96	7.04	2511.9	39.6		146.6	6.01		-183.612	-1360.75		n.d.	n.d.	n.d.	n.d.	n.d.	n.d.	n.d.	n.d.	n.d.	n.d.	n.d.	n.d.	n.d.	n.d.	n.d.	n.d.
21MP16b-E-1	150.681	0.315506		13.1435	1.01943	0.760591	0.0260489	-0.571429	2228.5	45.6	472.8	17.7	4849	24.4		43.33	1.68		-371.341	-925.592		n.d.	n.d.	n.d.	n.d.	n.d.	n.d.	n.d.	n.d.	n.d.	n.d.	n.d.	n.d.	n.d.	n.d.	n.d.	n.d.
21MP16b-E-2	166.007	0.158516		47.7634	1.38516	0.280024	0.0142595	-0.15828	601.3	14.2	133.58	1.92	3362.2	39.9		94.23	1.36		-350.142	-2416.99		n.d.	n.d.	n.d.	n.d.	n.d.	n.d.	n.d.	n.d.	n.d.	n.d.	n.d.	n.d.	n.d.	n.d.	n.d.	n.d.
21MP16b-E-3	237.04	0.316969		59.227	2.18517	0.147578	0.00421435	0.585332	299.77	3.97	107.93	1.98	2317.5	24.4		94.27	1.73		-177.745	-2047.23		n.d.	n.d.	n.d.	n.d.	n.d.	n.d.	n.d.	n.d.	n.d.	n.d.	n.d.	n.d.	n.d.	n.d.	n.d.	n.d.
21MP17-1	25.7346	0.438801		33.1314	5.42352	0.633542	0.0682323	0.0907817	1310.6	69	191.7	15.5	4586.2	77.9		50.27	4.1		-583.672	-2292.38		0.669557	0.128468	60.204	9.07119	87.0168	17.9315	11.5394	1.77605	5.8005	0.744831	5.03402	0.718367	33.1007	5.35868	12.0348	2.04013						490.565	753.194	12.5134
21MP17-10	495.736	0.691956		79.4932	4.74052	0.133488	0.0123364	-0.218828	211.4	11.5	80.59	2.39	2143.6	80.8		74.45	2.21		-162.315	-2559.88		552.713	37.5376	981.666	66.5723	2094.96	162.786	430.232	34.9957	359.237	29.5045	281.617	17.6254	871.126	52.7574	463.982	28.7852						771.324
21MP17-14	158.662	0.539281		62.0458	4.34917	0.205382	0.0207962	0.447041	381.6	14.9	103.07	3.58	2868.7	82.3		82.71	2.88		-270.234	-2683.25		339.999	62.7092	501.155	49.4054	1021.02	137.615	211.71	34.9408	165.225	34.5764	115.867	24.1289	355.08	45.3735	143.943	17.049						744.263
21MP17-15	166.625	0.622642		68.3334	6.5598	0.206968	0.0216144	0.431954	354.2	16	93.65	4.46	2881.2	84.8		74.93	3.58		-278.217	-2976.56		301.022	56.578	494.352	81.3	1016.7	167.419	212.247	34.4411	172.162	34.1274	131.384	26.9892	364.278	52.7242	178.451	27.7633						737.699
21MP17-2	92.6099	0.458977		65.9234	7.75993	0.288846	0.0298616	0.462985	479.7	22	97.05	5.67	3410.7	80.4		67.64	3.96		-394.281	-3414.37		358.492	81.1982	467.747	65.5067	656.846	86.7237	91.0782	10.9992	57.6601	9.81329	57.8222	7.89717	306.459	38.1617	111.919	16.2261						747.144
21MP17-27	149.148	0.753421		68.7937	4.23885	0.214498	0.0112878	0.401758	362.97	9.6	93.03	2.85	2939.1	42.5		73.55	2.25		-290.164	-3059.3		337.765	46.0996	452.015	47.555	673.564	64.819	140.007	15.6104	98.7708	12.4032	83.32	10.5748	227.423	22.46	139.064	12.9959						743.905
21MP17-28	215.543	0.696839		72.2537	8.74424	0.192066	0.0224531	0.520341	316.9	15.9	88.61	5.33	2759.2	96		72.54	4.36		-257.635	-3013.87		349.373	41.6933	512.663	56.504	903.743	98.9836	203.79	24.409	156.048	24.8275	101.917	13.5073	331.357	40.1164	182.632	18.7231						745.74
21MP17-3	316.012	0.618492		72.3084	4.48681	0.124373	0.0079386	0.462994	216	6.35	88.54	2.73	2019.1	56.6		80.03	2.47		-143.958	-2180.44		500.085	58.8468	875.863	94.832	4412.61	514.772	1394.33	181.027	1478.77	271.764	658.33	102.46	842.111	108.001	393.477	47.5359						765.634
21MP17-31	175.659	0.569529		61.9045	5.83366	0.208734	0.0196789	0.687525	387.5	12	103.3	4.83	2895	76.5		82.46	3.86		-275.121	-2702.52		355.47	50.7348	553.518	70.3701	732.299	82.1182	139.598	20.8309	88.0912	11.1971	79.6639	9.59464	404.871	38.7961	186.886	14.1733						746.682
21MP17-32	112.546	0.35546		62.969	2.82167	0.24974	0.0133668	0.40931	442.76	9.68	101.57	2.26	3182.4	42.4		75.83	1.69		-335.916	-3033.21		333.246	21.1367	508.179	48.645	571.734	53.9727	87.4172	6.74026	47.2607	4.83206	46.943	3.6794	392.265	31.3498	114.897	8.20816						743.175
21MP17-33	179.251	0.392212		40.2818	5.41399	0.452434	0.0514879	-0.748018	949.7	71.6	158.1	10.5	4092.6	84.6		101.49	6.77		-500.696	-2488.61		293.555	34.4525	578.298	116.561	1461.07	288.637	318.668	66.219	187.301	36.7065	120.496	22.2969	575.573	111.561	191.259	41.709						736.356
21MP17-34	348.926	0.429854		73.1472	4.31101	0.156188	0.00839978	0.11637	261.92	8.66	87.53	2.56	2414	45.7		75.61	2.22		-199.235	-2657.91		470.753	32.6444	1036.13	57.5121	2877.17	218.958	585.072	31.1868	358.911	21.1781	216.477	13.7376	1021.57	65.0726	366.021	24.7578						762.227
21MP17-35	124.579	0.395979		59.4556	2.97567	0.314071	0.0189544	-0.40159	555.4	19.8	107.52	2.67	3540.4	46.5		82.14	2.04		-416.555	-3192.78		308.302	21.7691	536.025	39.7339	724.42	57.4388	115.331	8.99006	72.1879	6.76019	68.7875	6.47959	399.479	33.4563	132.253	9.72137						738.981
21MP17-36	246.789	0.332235		61.559	2.95683	0.295667	0.0102951	0.2742	515.8	10.3	103.88	2.47	3447	27		71.54	1.71		-396.534	-3218.25		428.814	28.5328	1010.14	72.173	2038.94	159.448	426.424	29.7115	255.856	17.1108	151.567	11.7877	908.492	56.8447	253.076	12.6408						757.011
21MP17-37	415.802	0.491724		68.0271	2.7221	0.19721	0.0103902	-0.0552422	341.31	9.84	94.07	1.87	2802.5	43.1		81.6	1.62		-262.826	-2879.16		503.835	37.5627	1179	119.465	3180.09	260.018	625.373	47.0818	374.009	30.7125	237.762	21.1621	1047.96	78.6113	435.061	35.4423						766.057
21MP17-38	302.68	0.331476		64.1562	3.59166	0.231329	0.0152736	-0.0318258	409.6	14.8	99.7	2.77	3060.5	52.8		83.48	2.32		-310.832	-2969.71		479.334	30.9246	1200.91	83.7878	2704.35	232.035	556.138	38.5203	292.434	23.9465	168.401	12.2929	1098.96	70.0835	308.06	17.4325						763.243
21MP17-39	483.837	0.491379		76.9831	3.89932	0.113307	0.00417927	0.260744	187.53	4.65	83.2	2.09	1852.3	33.3		76.34	1.92		-125.397	-2126.32		507.323	43.6066	1177.41	67.9499	3090.75	193.383	601.972	40.8593	353.418	20.6947	245.274	16.4469	1137.68	86.0125	488.109	38.5037						766.448
21MP17-4	364.462	0.734002		78.0949	5.35235	0.118172	0.00671866	0.271476	192.33	6.68	82.02	2.79	1928	50.9		74.76	2.55		-134.492	-2250.65		464.005	46.4501	813.088	93.0214	3908.93	432.369	1264.38	159.809	1266.47	159.678	618.305	81.0413	714.925	74.0396	428.347	53.346						761.416
21MP17-40	263.576	0.340371		71.7932	4.55714	0.151534	0.00767569	0.280551	259.26	7.92	89.17	2.81	2362.5	43.2		77.55	2.45		-190.748	-2549.43		408.047	28.9228	1016.91	73.5901	2244.88	193.108	439.031	34.7841	211.842	18.4597	134.374	11.2801	867.289	55.6316	252.981	19.7417						754.257
21MP17-41	254.074	0.304686		65.0142	4.39271	0.187768	0.00979299	0.234099	340.2	10.9	98.4	3.3	2722	43		81.13	2.72		-245.732	-2666.26		456.894	35.602	899.799	67.208	2360.82	188.029	486.159	27.6644	253.073	17.5209	138.732	9.25507	848.446	52.0104	227.474	19.918						760.551
21MP17-42	539.184	0.527811		71.3075	4.28188	0.173547	0.00911145	0.293641	293.7	8.56	89.77	2.68	2591.4	43.8		75.59	2.26		-227.169	-2786.71		564.134	42.8448	1168.85	55.1204	2927.65	191.869	571.729	35.7823	334.022	26.2629	236.595	16.636	1091.28	76.6128	501.505	31.1509						772.495
21MP17-43	407.584	0.426625		72.2949	4.19073	0.175061	0.0120366	0.0587279	292.4	11.1	88.56	2.55	2605.9	57.3		74.4	2.14		-230.172	-2842.52		418.609	41.1171	991.643	80.72	1916.2	182.737	382.633	28.344	213.771	20.6743	153.479	14.3829	927.212	84.4268	348.198	31.621						755.673
21MP17-44	561.298	0.532509		80.4991	3.62307	0.118651	0.00602364	0.438985	187.78	4.37	79.59	1.78	1935.2	45.4		72.48	1.62		-135.934	-2331.46		532.416	45.4298	1152.82	95.2173	2715.57	269.538	525.648	44.9673	296.837	24.867	227.138	22.5437	1057	70.763	492.32	32.7808						769.189
21MP17-45	533.632	0.50727		72.2958	4.73859	0.183592	0.0104454	0.320736	304.71	9.44	88.56	2.88	2684.8	47		73.44	2.39		-244.072	-2931.62		475.069	49.6436	1003.47	108.335	2474.53	265.496	515.222	42.2781	303.448	28.9214	230.006	22.7857	1026.31	112.064	458.729	49.141						762.74
21MP17-46	451.082	0.409513		76.7359	2.98383	0.121217	0.00476459	-0.0339776	200	5.1	83.47	1.61	1973.4	35		78.02	1.51		-139.607	-2264.2		487.97	44.2333	1056.83	90.1998	1821.01	158.431	314.402	25.045	176.106	13.5002	184.927	19.0679	1070.87	76.484	388.808	32.3703						764.249
21MP17-47	351.324	0.443954		69.9588	4.37809	0.157383	0.0121017	-0.0232062	274.2	12	91.49	2.84	2427	65.2		82.6	2.57		-199.705	-2552.75		437.256	34.6437	862.458	76.4328	1475.1	168.262	265.67	30.8311	141.641	15.8015	136.767	14.8934	759.42	66.5458	309.91	37.8214						758.096
21MP17-48	504.084	0.458266		66.5479	3.12321	0.178088	0.013344	0.329962	318.8	10.1	96.15	2.24	2634.4	62.2		80.43	1.88		-231.565	-2639.89		508.22	37.1193	1046.59	60.3749	2573.07	214.478	498.749	34.3787	308.25	22.4257	235.555	16.7846	1086.47	56.4348	433.186	20.6375						766.548
21MP17-49	156.912	0.606228		63.4724	4.01512	0.206985	0.0164856	0.698761	376.88	9.05	100.77	3.16	2881.4	64.7		80.65	2.54		-274	-2759.38		395.204	39.2234	484.31	38.3971	532.057	44.5197	87.287	7.54395	62.3943	6.0292	64.6618	6.15417	338.956	33.7667	178.808	14.8428						752.491
21MP17-5	259.785	0.62493		41.818	2.17615	0.453069	0.0317451	0.0427749	927.6	26	152.34	3.92	4094.6	52.1		74.88	1.94		-508.901	-2587.8		474.484	29.2428	788.969	65.0556	3533.01	264.103	916.254	66.3942	867.771	64.8671	511.044	38.5959	591.33	44.6836	292.519	16.1978						762.671
21MP17-50	307.597	0.317227		72.8711	4.2768	0.162605	0.00985512	-0.052209	272.3	10.3	87.86	2.56	2482.2	51.1		78.91	2.3		-209.925	-2725.18		468.787	36.3464	1060.5	75.7163	2016.47	162.878	350.909	31.6589	98.2305	9.67721	92.755	7.483	948.796	57.9863	267.305	21.7						761.992
21MP17-51	278.69	0.20856		70.8093	4.41739	0.153976	0.00721055	0.247685	266.16	7.97	90.4	2.8	2389.8	39.9		78.35	2.43		-194.425	-2543.58		475.231	31.7188	1476.38	102.858	2689.28	217.823	447.764	30.9254	168.304	13.6972	115.305	10.1826	1495.28	118.533	264.49	20.7599						762.759
21MP17-52	297.243	0.213509		58.5236	3.66447	0.291336	0.0170147	0.26357	530.4	15.2	109.22	3.39	3424.1	45.4		75.84	2.36		-385.625	-3035.05		478.561	27.8441	1452.49	99.3233	2429.45	308.409	389.58	37.6538	109.785	12.3098	88.5295	6.2094	1536.38	123.096	269.528	19.0852						763.152
21MP17-53	229.145	0.365538		69.7162	4.02625	0.175314	0.00984179	0.555013	302.14	7.02	91.81	2.63	2608.3	46.7		77.11	2.21		-229.093	-2740.98		404.923	41.1278	863.524	84.4188	1470.01	96.0356	270.515	21.3821	106.825	10.2265	96.2607	11.0144	781.62	71.3183	234.644	16.6222						753.832
21MP17-54	126.184	0.419891		47.5872	3.0651	0.442453	0.0228468	0.159932	837.5	21.6	134.06	4.27	4059.4	38.5		67.59	2.17		-524.72	-2928.05		346.905	32.3705	541.036	70.5407	759.481	88.4362	131.99	14.1465	71.8917	8.63222	60.0885	6.54327	426.702	37.9765	149.606	19.6332						745.355
21MP17-55	125.651	0.579084		74.7897	5.93293	0.246368	0.0155393	0.638226	380.07	9.88	85.62	3.37	3160.9	50		64.22	2.53		-343.903	-3591.78		296.5	34.3952	439.533	34.9888	777.535	64.0982	169.681	18.3443	131.235	16.8292	99.3821	12.5945	247.069	22.7562	117.088	12.4902						736.89
21MP17-56	129.555	0.716315		71.8871	3.99071	0.219405	0.0133884	0.04695	356.5	12.1	89.06	2.45	2975.6	49.1		69.84	1.93		-300.292	-3241.12		301.58	27.7306	468.027	40.2205	621.117	53.7367	127.61	14.499	87.1003	10.0865	78.0299	10.1856	211.969	16.8731	120.876	8.572						737.799
21MP17-57	258.649	0.622742		65.6027	4.18625	0.263078	0.0188586	-0.0429705	446.7	17.7	97.52	3.09	3264.5	56.4		78.9	2.5		-358.06	-3247.52		407.106	38.9272	718.491	84.6811	1500.92	216.451	369.85	57.9615	270.828	46.2844	161.051	23.0459	486.832	42.7776	251.757	35.6301						754.13
21MP17-58	204.066	0.785187		62.3453	5.6551	0.306346	0.0276197	0.0676551	525.1	25.3	102.58	4.62	3501.9	69.7		69.25	3.12		-411.893	-3313.82		404.344	33.2598	634.233	38.9635	975.986	69.7027	206.713	13.927	151.284	11.7964	112.63	8.54231	360.683	26.8845	220.175	14.7428						753.753
21MP17-59	121.606	0.684894		73.7808	3.80308	0.237051	0.0121634	-0.192376	372.2	12.4	86.79	2.22	3099.6	40.9		72.2	1.85		-328.851	-3471.38		300.547	24.2997	471.127	42.0519	695.629	79.5921	139.607	16.1317	103.915	12.9103	79.2931	9.18079	226.736	17.1625	121.784	10.3145						737.615
21MP17-6	87.4047	0.732317		67.0047	3.30786	0.263146	0.013505	0.0476829	439.2	12.4	95.5	2.34	3264.9	40.4		69.65	1.71		-359.895	-3318.74		268.743	11.6469	366.459	25.6414	1846.51	118.779	566.489	33.4903	617.859	42.1106	355.255	24.9882	153.153	9.82323	88.0367	5.15465						731.661
21MP17-60	299.358	0.508802		81.0707	3.95256	0.132157	0.00994181	0.534977	205.78	5.97	79.03	1.91	2126	65.9		70.63	1.71		-160.382	-2590.12		456.547	46.1716	949.014	98.242	2283.89	232.684	548.963	54.5966	449.137	53.9985	260.451	28.934	821.39	63.1005	323.695	24.3675						760.508
21MP17-61	131.004	0.616192		70.9502	5.35814	0.263492	0.0201611	0.170978	419.7	16.8	90.22	3.38	3267	60.2		65.74	2.47		-365.196	-3521.15		311.795	29.0821	459.972	49.7513	897.537	96.0058	207.669	23.3206	156.804	19.4192	110.343	13.8136	262.792	20.5327	127.592	10.924						739.586
21MP17-62	136.267	0.641037		69.8737	3.58004	0.2387	0.0189669	0.138688	391.7	14.4	91.6	2.33	3110.6	63.3		69.62	1.77		-327.62	-3295.85		298.463	20.8586	466.517	40.6926	874.843	52.8464	194.189	12.7092	141.641	9.11212	100.841	7.50484	255.076	15.8358	131.189	10.628						737.243
21MP17-63	234.347	0.808351		76.1639	4.81445	0.149366	0.00911391	0.33019	242.92	7.77	84.09	2.64	2337.9	52.2		73.35	2.31		-188.881	-2680.24		426.687	36.167	574.217	37.7579	870.462	62.7384	178.917	12.0312	121.236	9.79563	106.861	8.0674	345.669	18.8674	223.112	12.6531						756.735
21MP17-64	128.964	0.627454		73.891	4.45751	0.235133	0.0149793	-0.0124932	369.2	13.7	86.66	2.6	3086.6	50.8		72.24	2.17		-326.033	-3461.74		361.002	34.7524	529.558	49.0915	965.238	94.0789	218.91	21.2491	163.839	16.2884	115.635	11.2494	276.519	25.6851	138.015	11.2013						747.525
21MP17-65	108.69	0.579078		70.2188	3.71091	0.245209	0.0160876	0.154816	398.9	12.8	91.16	2.39	3153.4	52.1		68.53	1.8		-337.582	-3359.19		250.309	22.5893	357.37	28.0859	848.596	43.8071	177.088	9.98225	134.168	9.10632	96.1774	6.97617	239.948	23.0592	109.173	6.78033						727.915
21MP17-66	127.991	0.554666		70.1713	2.93853	0.218032	0.0118326	0.292146	361.91	8.84	91.22	1.9	2965.5	43.7		71.7	1.49		-296.744	-3150.93		271.049	15.9045	457.63	28.4684	898.598	48.4142	209.266	12.8902	157.237	10.4763	108.568	8.3795	254.636	15.2392	115.356	6.33433						732.114
21MP17-67	356.299	0.90313		73.2077	3.97929	0.186482	0.00743966	-0.155394	305.52	9.53	87.46	2.36	2710.6	32.9		76.69	2.07		-249.325	-2999.25		484.23	33.6927	786.234	50.1809	1092.98	59.4997	226.928	15.7915	157.047	11.0492	139.38	9.45322	458.325	24.5707	342.022	22.6425						763.815
21MP17-68	276.112	0.692805		75.7624	2.9224	0.150791	0.00567852	0.309603	246.13	4.9	84.53	1.62	2354.1	32.2		73.58	1.41		-191.175	-2684.93		435.31	22.9163	704.817	35.4601	1246.12	73.9394	290.871	17.1757	206.015	11.5524	147.416	9.79024	452.921	24.3156	260.84	14.6315						757.848
21MP17-69	204.062	0.678461		54.5396	2.762	0.30333	0.0148371	-0.383089	577.8	18.2	117.13	2.94	3486.6	37.8		90.62	2.28		-393.298	-2876.69		295.195	22.2482	440.792	28.3445	840.056	42.3246	182.452	9.58782	149.2	8.39774	154.564	11.5046	312.504	17.0152	178.386	13.7528						736.654
21MP17-7	80.5395	0.809497		66.329	2.45001	0.281903	0.0152538	0.0125116	468.1	12.2	96.46	1.77	3372.8	42.2		68.07	1.25		-385.279	-3396.58		313.739	18.2588	389.863	22.0056	1981.71	91.0162	655.132	31.7977	748.083	40.5218	414.517	24.1242	136.02	7.21177	85.9387	3.84546						739.92
21MP17-70	264.266	0.700986		77.028	3.57415	0.163078	0.00837819	-0.177875	259.96	8.61	83.15	1.92	2487.1	43.3		74.63	1.72		-212.64	-2891.1		409.687	22.2292	659.206	47.1591	925.871	60.7532	196.033	19.9774	166.556	19.0489	163.385	14.0428	425.569	32.6252	246.463	12.7232						754.479
21MP17-71	271.937	0.715485		58.5558	4.66012	0.30248	0.0336844	-0.425107	545.9	34.2	109.16	4.31	3482.3	86.2		84.52	3.34		-400.092	-3090.09		403.048	28.224	633.081	38.55	1002.53	66.4774	228.347	20.0127	173.11	11.191	139.086	8.77164	372.632	24.5385	233.811	16.0517						753.576
21MP17-72	331.45	0.594663		51.3392	5.14744	0.364412	0.0311492	-0.410557	692.7	39.2	124.36	6.17	3767.7	64.8		89.48	4.45		-457.012	-2929.67		450.969	49.7692	764.629	85.6122	1459.14	152.761	366.762	41.9675	268.928	34.4571	168.85	21.1445	523.383	52.1432	270.736	28.1426						759.82
21MP17-73	515.635	0.503664		63.6517	6.04095	0.239159	0.0237498	-0.261523	423.7	26.7	100.49	4.73	3113.7	79.1		83.44	3.93		-321.634	-2998.52		544.229	69.0149	1149.37	160.768	2582.98	333.877	594.043	74.1152	453.355	68.5343	257.308	37.9841	1014.37	121.331	443.192	52.2724						770.441
21MP17-74	528.939	0.470898		85.8449	6.75217	0.122556	0.0064054	0.512981	182.38	5.72	74.66	2.92	1993	46.5		67.62	2.65		-144.281	-2569.43		522.338	53.293	1078.13	87.1599	2963.62	296.657	714.512	65.7656	593.881	56.6447	357.619	39.1938	1039.5	93.6685	428.547	38.6299						768.102
21MP17-75	190.476	0.573387		49.04	3.62483	0.388477	0.0236318	-0.109568	749.4	26.7	130.13	4.76	3864.4	45.9		90.87	3.33		-475.886	-2869.65		344.813	27.7414	510.829	41.0322	727.083	57.8523	151.884	13.1399	119.097	11.2262	96.2828	9.03897	298.252	18.8877	154.891	11.805						745.026
21MP17-76	133.063	0.503751		65.3262	4.64695	0.31253	0.0353188	-0.64941	514.2	33.9	97.93	3.46	3532.8	87.1		74.92	2.65		-425.069	-3507.47		254.468	19.963	339.429	21.4465	689.473	55.819	143.312	13.0738	114.708	11.5896	93.3034	8.27944	239.129	17.0594	108.839	6.55136						728.781
21MP17-8	474.304	0.626243		73.8299	4.38997	0.169978	0.0166951	-0.497142	279.8	16.9	86.73	2.56	2556.7	82.2		73.41	2.17		-222.61	-2847.88		586.731	42.1627	1049.31	65.214	2745.54	213.71	599.199	42.1445	493.633	28.7792	324.611	20.9655	981.935	54.1409	477.503	25.8993						774.75
21MP17-9	475.484	0.629173		79.7767	4.33306	0.14456	0.00878117	0.130582	226.36	7.71	80.3	2.17	2281.8	52.3		70.52	1.9		-181.893	-2741.59		525.201	41.6192	1004.1	64.322	2971.33	197.592	662.215	42.8032	562.145	41.4581	332.734	24.6856	928.125	59.1036	447.771	24.5403						768.413
LCVI-1	69.4105	0.264444		51.2655	1.29939	0.289641	0.0104461	0.0041198	584.61	9.77	124.52	1.56	3414.8	27.9		83.66	1.05		-369.491	-2642.37		n.d.	n.d.	n.d.	n.d.	n.d.	n.d.	n.d.	n.d.	n.d.	n.d.	n.d.	n.d.	n.d.	n.d.	n.d.	n.d.
LCVI-10	78.9616	0.25824		53.2413	1.2589	0.259508	0.0143233	-0.269546	521.8	13.4	119.96	1.41	3243	43.4		85.5	1.01		-334.978	-2603.4		n.d.	n.d.	n.d.	n.d.	n.d.	n.d.	n.d.	n.d.	n.d.	n.d.	n.d.	n.d.	n.d.	n.d.	n.d.	n.d.
LCVI-11	102.578	0.299583		60.323	1.32582	0.207006	0.00623678	0.250167	393.22	5.29	105.99	1.16	2881.5	24.3		83.08	0.91		-270.997	-2618.65		n.d.	n.d.	n.d.	n.d.	n.d.	n.d.	n.d.	n.d.	n.d.	n.d.	n.d.	n.d.	n.d.	n.d.	n.d.	n.d.
LCVI-12	113.754	0.31789		60.3052	1.5724	0.211852	0.00763519	-0.832419	400.97	9.82	106.01	1.37	2919.4	29		82.39	1.07		-278.238	-2653.89		n.d.	n.d.	n.d.	n.d.	n.d.	n.d.	n.d.	n.d.	n.d.	n.d.	n.d.	n.d.	n.d.	n.d.	n.d.	n.d.
LCVI-13	115.163	0.313607		43.7067	1.78543	0.366278	0.0143813	-0.680323	779.6	20	145.82	2.95	3775.5	29.8		82.78	1.68		-434.632	-2489.15		n.d.	n.d.	n.d.	n.d.	n.d.	n.d.	n.d.	n.d.	n.d.	n.d.	n.d.	n.d.	n.d.	n.d.	n.d.	n.d.
LCVI-14	99.3097	0.344111		48.3806	1.49927	0.320455	0.00993317	-0.545083	658.6	13.2	131.89	2.02	3571.5	23.8		83.07	1.28		-399.356	-2607.94		n.d.	n.d.	n.d.	n.d.	n.d.	n.d.	n.d.	n.d.	n.d.	n.d.	n.d.	n.d.	n.d.	n.d.	n.d.	n.d.
LCVI-15	99.6924	0.312848		44.7539	1.57363	0.341485	0.0194306	-0.732076	729.7	22.3	142.47	2.47	3668.8	43.4		85.69	1.49		-412.178	-2475.14		n.d.	n.d.	n.d.	n.d.	n.d.	n.d.	n.d.	n.d.	n.d.	n.d.	n.d.	n.d.	n.d.	n.d.	n.d.	n.d.
LCVI-16	74.3948	0.262196		47.484	2.18476	0.307929	0.0194271	-0.629991	648.4	23.6	134.36	3.05	3509.7	48.7		86.95	1.98		-382.584	-2512.16		n.d.	n.d.	n.d.	n.d.	n.d.	n.d.	n.d.	n.d.	n.d.	n.d.	n.d.	n.d.	n.d.	n.d.	n.d.	n.d.
LCVI-17	69.9464	0.257704		42.4719	1.26134	0.368514	0.0161471	-0.359556	798.6	16.9	150.03	2.2	3784.6	33.1		84.74	1.25		-432.294	-2422.56		n.d.	n.d.	n.d.	n.d.	n.d.	n.d.	n.d.	n.d.	n.d.	n.d.	n.d.	n.d.	n.d.	n.d.	n.d.	n.d.
LCVI-18	72.6578	0.250402		51.5135	2.00247	0.279187	0.013844	-0.591442	566.5	17.1	123.95	2.38	3357.8	38.6		85.03	1.64		-357.039	-2609		n.d.	n.d.	n.d.	n.d.	n.d.	n.d.	n.d.	n.d.	n.d.	n.d.	n.d.	n.d.	n.d.	n.d.	n.d.	n.d.
LCVI-19	73.3197	0.25722		51.1549	0.98155	0.290745	0.012422	0.0764507	587.3	10.1	124.81	1.18	3420.7	33.2		83.66	0.8		-370.555	-2640.73		n.d.	n.d.	n.d.	n.d.	n.d.	n.d.	n.d.	n.d.	n.d.	n.d.	n.d.	n.d.	n.d.	n.d.	n.d.	n.d.
LCVI-2	76.1428	0.302111		59.5808	1.19811	0.219723	0.00816235	0.164248	417.24	6.75	107.3	1.07	2977.8	30.1		82.26	0.82		-288.854	-2675.21		n.d.	n.d.	n.d.	n.d.	n.d.	n.d.	n.d.	n.d.	n.d.	n.d.	n.d.	n.d.	n.d.	n.d.	n.d.	n.d.
LCVI-20	77.6811	0.255071		57.4123	1.33084	0.235111	0.00753572	-0.136893	454.37	7.69	111.32	1.28	3086.4	25.5		83.01	0.96		-308.166	-2672.55		n.d.	n.d.	n.d.	n.d.	n.d.	n.d.	n.d.	n.d.	n.d.	n.d.	n.d.	n.d.	n.d.	n.d.	n.d.	n.d.
LCVI-21	78.2241	0.241086		28.3656	1.79038	0.515388	0.0169514	-0.694366	1273.1	32.3	223.31	6.92	4285.2	24.3		81.58	2.56		-470.104	-1818.95		n.d.	n.d.	n.d.	n.d.	n.d.	n.d.	n.d.	n.d.	n.d.	n.d.	n.d.	n.d.	n.d.	n.d.	n.d.	n.d.
LCVI-22	79.4158	0.282348		52.0577	1.04723	0.292098	0.00797721	-0.0279928	581.64	7.64	122.65	1.23	3428.1	21.3		81.97	0.82		-374.227	-2695.03		n.d.	n.d.	n.d.	n.d.	n.d.	n.d.	n.d.	n.d.	n.d.	n.d.	n.d.	n.d.	n.d.	n.d.	n.d.	n.d.
LCVI-23	74.8326	0.257457		50.4915	1.02502	0.315896	0.0140427	-0.194524	631.4	12.3	126.43	1.28	3549.3	34.1		80.41	0.82		-399.407	-2707.32		n.d.	n.d.	n.d.	n.d.	n.d.	n.d.	n.d.	n.d.	n.d.	n.d.	n.d.	n.d.	n.d.	n.d.	n.d.	n.d.
LCVI-24	114.676	0.310339		61.4147	1.55296	0.234461	0.0145432	-0.338739	429.3	13	104.13	1.3	3082.3	49.4		77.71	0.97		-312.273	-2860.05		n.d.	n.d.	n.d.	n.d.	n.d.	n.d.	n.d.	n.d.	n.d.	n.d.	n.d.	n.d.	n.d.	n.d.	n.d.	n.d.
LCVI-25	81.2628	0.281605		55.8677	3.49495	0.277791	0.030203	-0.884093	530	34.3	114.36	3.54	3349.9	85		78.64	2.44		-363.449	-2829.26		n.d.	n.d.	n.d.	n.d.	n.d.	n.d.	n.d.	n.d.	n.d.	n.d.	n.d.	n.d.	n.d.	n.d.	n.d.	n.d.
LCVI-26	82.611	0.249916		43.9431	1.0786	0.389423	0.0134667	-0.115005	810.4	12.5	145.06	1.76	3868	26.1		77.77	0.95		-458.665	-2566.48		n.d.	n.d.	n.d.	n.d.	n.d.	n.d.	n.d.	n.d.	n.d.	n.d.	n.d.	n.d.	n.d.	n.d.	n.d.	n.d.
LCVI-27	87.48	0.254741		48.4007	1.05039	0.348472	0.0112104	-0.0815156	699.9	10.2	131.83	1.42	3699.8	24.5		78	0.84		-430.911	-2706.49		n.d.	n.d.	n.d.	n.d.	n.d.	n.d.	n.d.	n.d.	n.d.	n.d.	n.d.	n.d.	n.d.	n.d.	n.d.	n.d.
LCVI-28	132.733	0.317654		61.546	3.43054	0.254386	0.0322371	-0.878939	457.8	32.7	103.89	2.87	3211.6	100		74.72	2.07		-340.658	-2991.35		n.d.	n.d.	n.d.	n.d.	n.d.	n.d.	n.d.	n.d.	n.d.	n.d.	n.d.	n.d.	n.d.	n.d.	n.d.	n.d.
LCVI-29	133.001	0.30456		61.9139	3.86856	0.232253	0.0306781	-0.891262	423.2	32.9	103.29	3.2	3067	106		77.4	2.4		-309.72	-2869.31		n.d.	n.d.	n.d.	n.d.	n.d.	n.d.	n.d.	n.d.	n.d.	n.d.	n.d.	n.d.	n.d.	n.d.	n.d.	n.d.
LCVI-3	76.3199	0.27424		38.0988	5.32814	0.427986	0.0558379	-0.96757	949.8	82.7	167	11.5	4009.8	97.4		80.81	5.62		-468.743	-2301.08		n.d.	n.d.	n.d.	n.d.	n.d.	n.d.	n.d.	n.d.	n.d.	n.d.	n.d.	n.d.	n.d.	n.d.	n.d.	n.d.
LCVI-30	132.064	0.287518		51.2853	1.79141	0.340542	0.0123175	-0.458997	659.7	14.7	124.48	2.15	3664.3	27.6		74.98	1.3		-429.965	-2843.69		n.d.	n.d.	n.d.	n.d.	n.d.	n.d.	n.d.	n.d.	n.d.	n.d.	n.d.	n.d.	n.d.	n.d.	n.d.	n.d.
LCVI-31	88.4908	0.208447		29.8485	3.01063	0.506546	0.0248828	-0.854652	1224.1	51.5	212.4	10.5	4259.6	36.2		80.15	4.02		-476.318	-1905.46		n.d.	n.d.	n.d.	n.d.	n.d.	n.d.	n.d.	n.d.	n.d.	n.d.	n.d.	n.d.	n.d.	n.d.	n.d.	n.d.
LCVI-32	102.904	0.234591		46.9781	2.04365	0.338333	0.0153105	-0.663873	700	20.4	135.78	2.92	3654.4	34.6		82.24	1.77		-415.54	-2591.41		n.d.	n.d.	n.d.	n.d.	n.d.	n.d.	n.d.	n.d.	n.d.	n.d.	n.d.	n.d.	n.d.	n.d.	n.d.	n.d.
LCVI-33	95.1168	0.239916		43.6875	0.932197	0.359175	0.00945049	-0.189616	769.22	9.97	145.89	1.54	3745.8	20.1		84.24	0.89		-427.26	-2467.55		n.d.	n.d.	n.d.	n.d.	n.d.	n.d.	n.d.	n.d.	n.d.	n.d.	n.d.	n.d.	n.d.	n.d.	n.d.	n.d.
LCVI-34	99.3432	0.314451		38.8073	1.18835	0.414996	0.010694	-0.286584	919.6	13.7	164	2.48	3963.7	19.3		82.26	1.25		-460.732	-2316.89		n.d.	n.d.	n.d.	n.d.	n.d.	n.d.	n.d.	n.d.	n.d.	n.d.	n.d.	n.d.	n.d.	n.d.	n.d.	n.d.
LCVI-35	137.316	0.320181		50.0681	1.03838	0.306192	0.00851133	0.113678	620.7	7.61	127.48	1.31	3501.2	21.5		82.77	0.85		-386.9	-2646.47		n.d.	n.d.	n.d.	n.d.	n.d.	n.d.	n.d.	n.d.	n.d.	n.d.	n.d.	n.d.	n.d.	n.d.	n.d.	n.d.
LCVI-36	135.426	0.323548		56.5429	2.81873	0.239032	0.0184096	-0.756511	466.1	22.3	113.02	2.79	3112.6	61.3		83.69	2.07		-312.405	-2654.03		n.d.	n.d.	n.d.	n.d.	n.d.	n.d.	n.d.	n.d.	n.d.	n.d.	n.d.	n.d.	n.d.	n.d.	n.d.	n.d.
LCVI-37	133.238	0.308237		49.0173	3.27269	0.296984	0.0377243	-0.912018	616.4	43.8	130.18	4.3	3453.9	98.4		86.17	2.85		-373.498	-2553.17		n.d.	n.d.	n.d.	n.d.	n.d.	n.d.	n.d.	n.d.	n.d.	n.d.	n.d.	n.d.	n.d.	n.d.	n.d.	n.d.
LCVI-38	140.441	0.286087		39.2352	2.15463	0.391584	0.0218217	-0.818298	878.5	31	162.22	4.39	3876.5	41.9		86.56	2.36		-441.549	-2289.66		n.d.	n.d.	n.d.	n.d.	n.d.	n.d.	n.d.	n.d.	n.d.	n.d.	n.d.	n.d.	n.d.	n.d.	n.d.	n.d.
LCVI-39	146.481	0.289877		54.8018	2.73719	0.266129	0.0200787	-0.846658	520.2	24.6	116.57	2.89	3282.5	59.3		82.02	2.04		-346.255	-2715.9		n.d.	n.d.	n.d.	n.d.	n.d.	n.d.	n.d.	n.d.	n.d.	n.d.	n.d.	n.d.	n.d.	n.d.	n.d.	n.d.
LCVI-4	75.6564	0.205242		38.902	0.8959	0.40442	0.010477	0.0747279	902.7	10	163.62	1.87	3924.8	19.5		84.44	0.97		-451.705	-2298.73		n.d.	n.d.	n.d.	n.d.	n.d.	n.d.	n.d.	n.d.	n.d.	n.d.	n.d.	n.d.	n.d.	n.d.	n.d.	n.d.
LCVI-40	116.363	0.261789		32.9285	1.18775	0.466824	0.0151184	-0.360917	1099.7	19	192.85	3.43	4139	24		83.19	1.49		-470.236	-2046.23		n.d.	n.d.	n.d.	n.d.	n.d.	n.d.	n.d.	n.d.	n.d.	n.d.	n.d.	n.d.	n.d.	n.d.	n.d.	n.d.
LCVI-41	118.598	0.269564		23.9468	0.939156	0.558208	0.0132281	-0.0428172	1460.1	18.1	263.69	5.07	4402.1	17.3		81.01	1.58		-453.718	-1569.42		n.d.	n.d.	n.d.	n.d.	n.d.	n.d.	n.d.	n.d.	n.d.	n.d.	n.d.	n.d.	n.d.	n.d.	n.d.	n.d.
LCVI-42	137.395	0.291838		43.0954	2.4452	0.375172	0.0176991	-0.767919	800.5	27.1	147.86	4.15	3811.9	35.7		82.15	2.32		-441.391	-2478.05		n.d.	n.d.	n.d.	n.d.	n.d.	n.d.	n.d.	n.d.	n.d.	n.d.	n.d.	n.d.	n.d.	n.d.	n.d.	n.d.
LCVI-43	144.334	0.310473		53.4174	1.47479	0.272392	0.0157379	-0.355039	540.4	15.1	119.56	1.63	3319.2	45.1		83.11	1.14		-351.991	-2676.18		n.d.	n.d.	n.d.	n.d.	n.d.	n.d.	n.d.	n.d.	n.d.	n.d.	n.d.	n.d.	n.d.	n.d.	n.d.	n.d.
LCVI-44	131.651	0.344199		50.6407	4.00024	0.301593	0.0247345	-0.834333	608.5	35.2	126.06	4.93	3477.8	63.4		82.63	3.24		-382.707	-2658.84		n.d.	n.d.	n.d.	n.d.	n.d.	n.d.	n.d.	n.d.	n.d.	n.d.	n.d.	n.d.	n.d.	n.d.	n.d.	n.d.
LCVI-45	148.012	0.252901		61.5294	1.86631	0.192604	0.00804611	-0.304815	364.17	8.93	103.93	1.57	2763.8	34.1		83.5	1.26		-250.399	-2559.29		n.d.	n.d.	n.d.	n.d.	n.d.	n.d.	n.d.	n.d.	n.d.	n.d.	n.d.	n.d.	n.d.	n.d.	n.d.	n.d.
LCVI-46	144.346	0.289066		33.1717	3.81218	0.478012	0.0372101	-0.936278	1110.8	64.1	191.5	10.8	4174.1	57.6		79.65	4.55		-480.052	-2079.69		n.d.	n.d.	n.d.	n.d.	n.d.	n.d.	n.d.	n.d.	n.d.	n.d.	n.d.	n.d.	n.d.	n.d.	n.d.	n.d.
LCVI-47	75.6558	0.396247		25.7527	5.79621	0.548043	0.0488785	-0.951573	1390	118	245.6	27.1	4375.2	65.3		78.82	8.82		-465.961	-1681.43		n.d.	n.d.	n.d.	n.d.	n.d.	n.d.	n.d.	n.d.	n.d.	n.d.	n.d.	n.d.	n.d.	n.d.	n.d.	n.d.
LCVI-48	122.742	0.361841		32.6784	2.07067	0.482206	0.0232586	-0.7471	1126.8	35.6	194.3	6.06	4187	35.7		79.72	2.51		-479.928	-2054.92		n.d.	n.d.	n.d.	n.d.	n.d.	n.d.	n.d.	n.d.	n.d.	n.d.	n.d.	n.d.	n.d.	n.d.	n.d.	n.d.
LCVI-49	142.906	0.397012		53.116	3.2408	0.291621	0.0226658	-0.805037	572	28.9	120.23	3.63	3425.5	60.5		80.43	2.44		-375.755	-2749.12		n.d.	n.d.	n.d.	n.d.	n.d.	n.d.	n.d.	n.d.	n.d.	n.d.	n.d.	n.d.	n.d.	n.d.	n.d.	n.d.
LCVI-5	73.2903	0.262685		45.7872	3.45045	0.351436	0.0337568	-0.864739	732.7	43.2	139.27	5.19	3712.4	73.2		81.87	3.06		-426.1	-2565.61		n.d.	n.d.	n.d.	n.d.	n.d.	n.d.	n.d.	n.d.	n.d.	n.d.	n.d.	n.d.	n.d.	n.d.	n.d.	n.d.
LCVI-50	164.183	0.38473		57.3998	2.30356	0.24206	0.0199497	-0.820328	465.3	21.9	111.34	2.21	3133.1	65.3		81.97	1.63		-317.909	-2713.99		n.d.	n.d.	n.d.	n.d.	n.d.	n.d.	n.d.	n.d.	n.d.	n.d.	n.d.	n.d.	n.d.	n.d.	n.d.	n.d.
LCVI-51	160.942	0.361926		58.6163	2.29596	0.216119	0.0179341	-0.603651	417.1	19	109.04	2.12	2951.1	66.9		84.13	1.64		-282.52	-2606.44		n.d.	n.d.	n.d.	n.d.	n.d.	n.d.	n.d.	n.d.	n.d.	n.d.	n.d.	n.d.	n.d.	n.d.	n.d.	n.d.
LCVI-52	159.008	0.357955		50.1546	3.10577	0.317802	0.0264337	-0.859395	637.4	33.1	127.28	3.91	3558.5	63.9		80.62	2.48		-400.786	-2695.8		n.d.	n.d.	n.d.	n.d.	n.d.	n.d.	n.d.	n.d.	n.d.	n.d.	n.d.	n.d.	n.d.	n.d.	n.d.	n.d.
LCVI-53	158.285	0.346689		44.7125	2.21175	0.36015	0.0226567	-0.806102	758.3	28.6	142.59	3.49	3750	47.9		82.13	2.02		-431.804	-2529.92		n.d.	n.d.	n.d.	n.d.	n.d.	n.d.	n.d.	n.d.	n.d.	n.d.	n.d.	n.d.	n.d.	n.d.	n.d.	n.d.
LCVI-54	148.418	0.307171		45.3273	1.23164	0.360058	0.00993332	0.0713707	750.84	9.88	140.66	1.89	3749.6	20.9		81.03	1.09		-433.798	-2565.72		n.d.	n.d.	n.d.	n.d.	n.d.	n.d.	n.d.	n.d.	n.d.	n.d.	n.d.	n.d.	n.d.	n.d.	n.d.	n.d.
LCVI-55	129.308	0.324574		53.9531	1.76869	0.263299	0.0192359	-0.61976	522.3	19.8	118.39	1.92	3265.9	57.4		83.76	1.37		-341.169	-2658.59		n.d.	n.d.	n.d.	n.d.	n.d.	n.d.	n.d.	n.d.	n.d.	n.d.	n.d.	n.d.	n.d.	n.d.	n.d.	n.d.
LCVI-56	128.687	0.279907		53.6737	2.21582	0.278903	0.0164843	-0.758651	548.4	20	119.01	2.44	3356.1	46.2		81.67	1.68		-360.802	-2720.02		n.d.	n.d.	n.d.	n.d.	n.d.	n.d.	n.d.	n.d.	n.d.	n.d.	n.d.	n.d.	n.d.	n.d.	n.d.	n.d.
LCVI-57	88.0564	0.24991		46.0252	4.23421	0.371143	0.041532	-0.909457	758.7	53.2	138.55	6.3	3795.2	84.7		77.72	3.55		-447.6	-2639.23		n.d.	n.d.	n.d.	n.d.	n.d.	n.d.	n.d.	n.d.	n.d.	n.d.	n.d.	n.d.	n.d.	n.d.	n.d.	n.d.
LCVI-58	107.705	0.286919		56.3138	1.3859	0.24557	0.00827554	0.225581	477.93	7.05	113.48	1.39	3155.9	26.8		83.01	1.02		-321.158	-2681.02		n.d.	n.d.	n.d.	n.d.	n.d.	n.d.	n.d.	n.d.	n.d.	n.d.	n.d.	n.d.	n.d.	n.d.	n.d.	n.d.
LCVI-59	76.5817	0.285562		37.9299	3.83299	0.400998	0.0313965	-0.923978	912.8	52.9	167.75	8.36	3912.2	58.9		87.37	4.38		-444.143	-2232.16		n.d.	n.d.	n.d.	n.d.	n.d.	n.d.	n.d.	n.d.	n.d.	n.d.	n.d.	n.d.	n.d.	n.d.	n.d.	n.d.
LCVI-6	70.7974	0.265844		58.1077	1.1784	0.230413	0.00818931	0.423134	442.66	5.87	109.99	1.11	3054.1	28.5		82.72	0.83		-302.455	-2676.71		n.d.	n.d.	n.d.	n.d.	n.d.	n.d.	n.d.	n.d.	n.d.	n.d.	n.d.	n.d.	n.d.	n.d.	n.d.	n.d.
LCVI-7	80.7725	0.27354		36.1947	3.0549	0.440469	0.0344604	-0.852739	1000	49.7	175.71	7.3	4052.8	58.4		82.05	3.44		-469.12	-2206.53		n.d.	n.d.	n.d.	n.d.	n.d.	n.d.	n.d.	n.d.	n.d.	n.d.	n.d.	n.d.	n.d.	n.d.	n.d.	n.d.
LCVI-8	72.9228	0.262048		42.3513	2.02494	0.384753	0.0180693	-0.656116	824.4	24.4	150.45	3.55	3850	35.5		81.62	1.93		-447.956	-2458.99		n.d.	n.d.	n.d.	n.d.	n.d.	n.d.	n.d.	n.d.	n.d.	n.d.	n.d.	n.d.	n.d.	n.d.	n.d.	n.d.
LCVI-9	70.5114	0.258844		42.8869	1.8065	0.35885	0.0227408	-0.63085	778.6	26	148.58	3.1	3744.1	48.1		85.88	1.8		-424.027	-2419.92		n.d.	n.d.	n.d.	n.d.	n.d.	n.d.	n.d.	n.d.	n.d.	n.d.	n.d.	n.d.	n.d.	n.d.	n.d.	n.d.
LCVIA-53	89.9413	0.201183		58.2418	1.25022	0.225942	0.00755438	0.52603	434.83	5.09	109.75	1.17	3022.5	27		83.21	0.89		-296.2	-2653.99		n.d.	n.d.	n.d.	n.d.	n.d.	n.d.	n.d.	n.d.	n.d.	n.d.	n.d.	n.d.	n.d.	n.d.	n.d.	n.d.
LCVIA-2	92.7129	0.309219		64.7975	1.28193	0.184908	0.00589742	0.265371	336.74	4.68	98.72	0.97	2696.6	26.4		80.33	0.79		-241.106	-2631.56		n.d.	n.d.	n.d.	n.d.	n.d.	n.d.	n.d.	n.d.	n.d.	n.d.	n.d.	n.d.	n.d.	n.d.	n.d.	n.d.
LCVIA-52	95.8603	0.241804		56.9516	1.27604	0.203419	0.00516818	0.276835	406.43	4.84	112.21	1.25	2852.9	20.8		88.53	0.99		-262.205	-2442.47		n.d.	n.d.	n.d.	n.d.	n.d.	n.d.	n.d.	n.d.	n.d.	n.d.	n.d.	n.d.	n.d.	n.d.	n.d.	n.d.
LCVIA-55	98.6698	0.273888		21.4758	3.74924	0.583204	0.035822	-0.929978	1580.4	93.3	293.3	25	4466	44.7		80.15	6.95		-438.834	-1422.67		n.d.	n.d.	n.d.	n.d.	n.d.	n.d.	n.d.	n.d.	n.d.	n.d.	n.d.	n.d.	n.d.	n.d.	n.d.	n.d.
LCVIA-51	100.696	0.320378		53.9431	2.29185	0.28167	0.0222736	-0.90181	550.5	25.2	118.42	2.49	3371.7	61.8		80.81	1.7		-364.871	-2747.24		n.d.	n.d.	n.d.	n.d.	n.d.	n.d.	n.d.	n.d.	n.d.	n.d.	n.d.	n.d.	n.d.	n.d.	n.d.	n.d.
LCVIA-16	101.709	0.296323		62.4627	1.91848	0.226265	0.0181122	-0.751741	411.2	17.8	102.39	1.56	3025.3	64.1		77.56	1.18		-301.602	-2854.68		n.d.	n.d.	n.d.	n.d.	n.d.	n.d.	n.d.	n.d.	n.d.	n.d.	n.d.	n.d.	n.d.	n.d.	n.d.	n.d.
LCVIA-3	102.288	0.345961		64.5231	1.72429	0.184594	0.00627591	-0.160478	337.52	6.68	99.15	1.31	2693.9	28.2		80.72	1.07		-240.414	-2616.99		n.d.	n.d.	n.d.	n.d.	n.d.	n.d.	n.d.	n.d.	n.d.	n.d.	n.d.	n.d.	n.d.	n.d.	n.d.	n.d.
LCVIA-58	105.167	0.319145		40.9647	4.08749	0.40723	0.0360981	-0.908379	876.2	54.1	155.49	7.67	3935.2	66.5		79.62	3.95		-463.509	-2430.84		n.d.	n.d.	n.d.	n.d.	n.d.	n.d.	n.d.	n.d.	n.d.	n.d.	n.d.	n.d.	n.d.	n.d.	n.d.	n.d.
LCVIA-59	105.99	0.29954		57.57	2.2408	0.237846	0.0140716	-0.605496	457.5	16.3	111.01	2.14	3104.6	47.2		82.38	1.59		-312.125	-2696.68		n.d.	n.d.	n.d.	n.d.	n.d.	n.d.	n.d.	n.d.	n.d.	n.d.	n.d.	n.d.	n.d.	n.d.	n.d.	n.d.
LCVIA-18	106.199	0.324582		64.485	1.04393	0.182464	0.00687044	0.194478	334.38	5.44	99.19	0.79	2675	31.3		81.04	0.65		-237.111	-2596.84		n.d.	n.d.	n.d.	n.d.	n.d.	n.d.	n.d.	n.d.	n.d.	n.d.	n.d.	n.d.	n.d.	n.d.	n.d.	n.d.
LCVIA-17	106.502	0.312719		62.9802	2.31489	0.237582	0.0181688	-0.752998	425.1	18.6	101.55	1.85	3103.2	61		75.35	1.37		-318.612	-2955.83		n.d.	n.d.	n.d.	n.d.	n.d.	n.d.	n.d.	n.d.	n.d.	n.d.	n.d.	n.d.	n.d.	n.d.	n.d.	n.d.
LCVIA-57	106.589	0.253796		34.9442	1.37186	0.450094	0.0135212	-0.671794	1036.5	20.6	181.91	3.52	4084.9	22.3		82.58	1.61		-469.787	-2145.56		n.d.	n.d.	n.d.	n.d.	n.d.	n.d.	n.d.	n.d.	n.d.	n.d.	n.d.	n.d.	n.d.	n.d.	n.d.	n.d.
LCVIA-13	108.007	0.30185		45.4989	1.72181	0.381439	0.0145082	-0.502804	779.7	17.9	140.14	2.62	3836.6	28.7		76.65	1.44		-456.372	-2637.69		n.d.	n.d.	n.d.	n.d.	n.d.	n.d.	n.d.	n.d.	n.d.	n.d.	n.d.	n.d.	n.d.	n.d.	n.d.	n.d.
LCVIA-5	110.034	0.395276		52.1891	1.87262	0.319003	0.0212034	-0.652675	620.5	21.8	122.35	2.17	3564.3	51.1		77.28	1.38		-407.152	-2813.2		n.d.	n.d.	n.d.	n.d.	n.d.	n.d.	n.d.	n.d.	n.d.	n.d.	n.d.	n.d.	n.d.	n.d.	n.d.	n.d.
LCVIA-23	110.585	0.374894		60.1358	2.63045	0.269086	0.0183868	-0.772163	487.8	20.5	106.31	2.31	3300.1	53.6		74.33	1.62		-358.847	-3004.22		n.d.	n.d.	n.d.	n.d.	n.d.	n.d.	n.d.	n.d.	n.d.	n.d.	n.d.	n.d.	n.d.	n.d.	n.d.	n.d.
LCVIA-56	111.397	0.390049		53.2669	4.34472	0.265997	0.0331672	-0.893262	531.7	41.6	119.89	4.84	3281.9	98		84.39	3.42		-343.49	-2637.43		n.d.	n.d.	n.d.	n.d.	n.d.	n.d.	n.d.	n.d.	n.d.	n.d.	n.d.	n.d.	n.d.	n.d.	n.d.	n.d.
LCVIA-26	112.166	0.30456		28.9332	3.04743	0.52285	0.0247138	-0.792738	1269.4	52.8	219.1	11.4	4306.4	34.7		77.75	4.07		-479.37	-1865.5		n.d.	n.d.	n.d.	n.d.	n.d.	n.d.	n.d.	n.d.	n.d.	n.d.	n.d.	n.d.	n.d.	n.d.	n.d.	n.d.
LCVIA-4	112.373	0.392971		45.9614	1.62436	0.389498	0.0170985	-0.664736	785.7	19.7	138.76	2.42	3868.4	33.1		74.35	1.3		-466.229	-2687.84		n.d.	n.d.	n.d.	n.d.	n.d.	n.d.	n.d.	n.d.	n.d.	n.d.	n.d.	n.d.	n.d.	n.d.	n.d.	n.d.
LCVIA-12	112.834	0.365003		55.1104	1.44238	0.297705	0.0147008	-0.422936	565	14	115.92	1.5	3457.6	38.3		76.57	0.99		-387.405	-2882.75		n.d.	n.d.	n.d.	n.d.	n.d.	n.d.	n.d.	n.d.	n.d.	n.d.	n.d.	n.d.	n.d.	n.d.	n.d.	n.d.
LCVIA-21	114.868	0.325261		70.3811	1.38391	0.167365	0.00534925	-0.028475	287.89	4.73	90.95	0.89	2531.1	26.6		76.16	0.74		-216.537	-2682.96		n.d.	n.d.	n.d.	n.d.	n.d.	n.d.	n.d.	n.d.	n.d.	n.d.	n.d.	n.d.	n.d.	n.d.	n.d.	n.d.
LCVIA-54	116.563	0.202838		58.3856	1.55701	0.194391	0.00570151	0.312119	383.45	5.27	109.47	1.45	2779	24		87.7	1.16		-250.279	-2438.6		n.d.	n.d.	n.d.	n.d.	n.d.	n.d.	n.d.	n.d.	n.d.	n.d.	n.d.	n.d.	n.d.	n.d.	n.d.	n.d.
LCVIA-6	116.892	0.40443		51.3093	1.66735	0.320607	0.0138759	-0.459411	630.7	15.3	124.43	2.01	3572	33.3		78.33	1.27		-406.871	-2770.69		n.d.	n.d.	n.d.	n.d.	n.d.	n.d.	n.d.	n.d.	n.d.	n.d.	n.d.	n.d.	n.d.	n.d.	n.d.	n.d.
LCVIA-11	117.158	0.351415		53.3991	1.61603	0.316966	0.0137822	-0.482978	607	14.6	119.6	1.8	3554.6	33.5		75.86	1.14		-407.525	-2872.07		n.d.	n.d.	n.d.	n.d.	n.d.	n.d.	n.d.	n.d.	n.d.	n.d.	n.d.	n.d.	n.d.	n.d.	n.d.	n.d.
LCVIA-19	117.784	0.376172		69.1079	1.14935	0.157619	0.00531772	0.119196	277.5	4.33	92.61	0.77	2429.3	28.5		78.79	0.65		-199.644	-2523.15		n.d.	n.d.	n.d.	n.d.	n.d.	n.d.	n.d.	n.d.	n.d.	n.d.	n.d.	n.d.	n.d.	n.d.	n.d.	n.d.
LCVIA-22	118.361	0.333104		48.428	3.48876	0.357787	0.0321836	-0.843338	713	39.8	131.75	4.7	3739.9	68.4		76.27	2.73		-441.176	-2738.63		n.d.	n.d.	n.d.	n.d.	n.d.	n.d.	n.d.	n.d.	n.d.	n.d.	n.d.	n.d.	n.d.	n.d.	n.d.	n.d.
LCVIA-20	119.349	0.337031		70.4537	1.63586	0.16449	0.00591865	0.333723	283.29	4.42	90.86	1.05	2501.7	30.2		76.44	0.88		-211.787	-2653.36		n.d.	n.d.	n.d.	n.d.	n.d.	n.d.	n.d.	n.d.	n.d.	n.d.	n.d.	n.d.	n.d.	n.d.	n.d.	n.d.
LCVIA-25	119.662	0.326906		66.8261	2.15285	0.191063	0.013469	-0.754094	337.4	13.9	95.75	1.53	2750.9	58		77.09	1.23		-252.376	-2773		n.d.	n.d.	n.d.	n.d.	n.d.	n.d.	n.d.	n.d.	n.d.	n.d.	n.d.	n.d.	n.d.	n.d.	n.d.	n.d.
LCVIA-24	120.777	0.351788		68.3792	1.41692	0.167122	0.00616991	0.286179	294.73	4.72	93.59	0.96	2528	31.1		78.41	0.81		-214.916	-2601.14		n.d.	n.d.	n.d.	n.d.	n.d.	n.d.	n.d.	n.d.	n.d.	n.d.	n.d.	n.d.	n.d.	n.d.	n.d.	n.d.
LCVIA-60	124.183	0.219964		47.8332	1.0902	0.328955	0.0113645	-0.0275416	677.1	10.4	133.39	1.5	3611.7	26.6		82.47	0.93		-407.609	-2607.62		n.d.	n.d.	n.d.	n.d.	n.d.	n.d.	n.d.	n.d.	n.d.	n.d.	n.d.	n.d.	n.d.	n.d.	n.d.	n.d.
LCVIA-8	125.737	0.427618		65.4471	1.42468	0.186586	0.00725521	-0.258271	336.5	7.08	97.75	1.05	2711.7	32.3		79.31	0.86		-244.246	-2674.12		n.d.	n.d.	n.d.	n.d.	n.d.	n.d.	n.d.	n.d.	n.d.	n.d.	n.d.	n.d.	n.d.	n.d.	n.d.	n.d.
LCVIA-1	126.479	0.449456		67.6023	1.36418	0.157442	0.00401329	0.191912	282.59	3.61	94.66	0.95	2427.2	21.5		80.56	0.81		-198.532	-2464.12		n.d.	n.d.	n.d.	n.d.	n.d.	n.d.	n.d.	n.d.	n.d.	n.d.	n.d.	n.d.	n.d.	n.d.	n.d.	n.d.
LCVIA-14	126.54	0.406021		51.0348	1.46368	0.331524	0.0131931	-0.522468	649.2	14.4	125.1	1.77	3623.3	30.5		76.89	1.09		-418.945	-2796.32		n.d.	n.d.	n.d.	n.d.	n.d.	n.d.	n.d.	n.d.	n.d.	n.d.	n.d.	n.d.	n.d.	n.d.	n.d.	n.d.
LCVIA-7	128.562	0.42878		67.7661	1.32424	0.164176	0.00510754	0.479592	292.55	3.51	94.43	0.91	2498.6	26.1		79.49	0.77		-209.806	-2545.98		n.d.	n.d.	n.d.	n.d.	n.d.	n.d.	n.d.	n.d.	n.d.	n.d.	n.d.	n.d.	n.d.	n.d.	n.d.	n.d.
LCVIA-10	130.012	0.423978		67.6145	1.34482	0.162657	0.0048623	0.499993	290.83	3.35	94.65	0.93	2483.2	25.4		79.87	0.79		-207.269	-2523.56		n.d.	n.d.	n.d.	n.d.	n.d.	n.d.	n.d.	n.d.	n.d.	n.d.	n.d.	n.d.	n.d.	n.d.	n.d.	n.d.
LCVIA-15	130.247	0.420899		56.921	3.14981	0.276455	0.0322409	-0.902957	520.4	34.2	112.27	3.08	3342.6	91.1		77.39	2.13		-363.525	-2877.29		n.d.	n.d.	n.d.	n.d.	n.d.	n.d.	n.d.	n.d.	n.d.	n.d.	n.d.	n.d.	n.d.	n.d.	n.d.	n.d.
LCVIA-27	135.75	0.290401		46.6704	2.4598	0.382614	0.0234323	-0.846887	767.7	29.5	136.67	3.56	3841.4	46.2		74.51	1.95		-461.718	-2710.71		n.d.	n.d.	n.d.	n.d.	n.d.	n.d.	n.d.	n.d.	n.d.	n.d.	n.d.	n.d.	n.d.	n.d.	n.d.	n.d.
LCVIA-9	138.1	0.410901		63.2819	1.53093	0.199918	0.00583101	-0.0583876	366.98	5.99	101.07	1.21	2824.6	23.7		80.19	0.96		-263.095	-2694.7		n.d.	n.d.	n.d.	n.d.	n.d.	n.d.	n.d.	n.d.	n.d.	n.d.	n.d.	n.d.	n.d.	n.d.	n.d.	n.d.
																			#DIV/0!	#DIV/0!		n.d.	n.d.	n.d.	n.d.	n.d.	n.d.	n.d.	n.d.	n.d.	n.d.	n.d.	n.d.	n.d.	n.d.	n.d.	n.d.
Primary standards																			#DIV/0!	#DIV/0!		37.6606	1.79592	35.9311	1.07782	35.9849	0.987368	37.6562	1.65477	34.2928	1.42255	38.9206	1.25937	37.6479	1.12544	36.855	1.14608
MKED-1	127.988	0.343037		3.78375	0.0626814	0.0949347	0.00151485	0.55429	1517.67	6.05	1511.7	11.2	1525.9	15		1510.2	11.2		-0.39492	-0.93934		n.d.	n.d.	n.d.	n.d.	n.d.	n.d.	n.d.	n.d.	n.d.	n.d.	n.d.	n.d.	n.d.	n.d.	n.d.	n.d.
MKED-2	129.447	0.35051		3.73709	0.065868	0.095275	0.00165344	0.491673	1530.28	6.97	1528.5	12	1532.7	16.3		1528.1	12		-0.116454	-0.274779		n.d.	n.d.	n.d.	n.d.	n.d.	n.d.	n.d.	n.d.	n.d.	n.d.	n.d.	n.d.	n.d.	n.d.	n.d.	n.d.
MKED-3	132.163	0.34772		3.78427	0.0642259	0.0941634	0.00184705	0.398457	1511.13	7.93	1511.6	11.4	1510.5	18.5		1511.7	11.4		0.0310929	0.0727706		n.d.	n.d.	n.d.	n.d.	n.d.	n.d.	n.d.	n.d.	n.d.	n.d.	n.d.	n.d.	n.d.	n.d.	n.d.	n.d.
MKED-4	136.521	0.35398		3.80163	0.0622434	0.0945687	0.00167502	0.406587	1510.92	7.31	1505.4	11	1518.7	16.7		1504	11		-0.36668	-0.883486		n.d.	n.d.	n.d.	n.d.	n.d.	n.d.	n.d.	n.d.	n.d.	n.d.	n.d.	n.d.	n.d.	n.d.	n.d.	n.d.
MKED-5	137.56	0.358247		3.7663	0.0710319	0.0949185	0.00162676	0.264631	1521.17	8.62	1518	12.8	1525.6	16.1		1517.2	12.7		-0.208827	-0.500659		n.d.	n.d.	n.d.	n.d.	n.d.	n.d.	n.d.	n.d.	n.d.	n.d.	n.d.	n.d.	n.d.	n.d.	n.d.	n.d.
MKED-6	132.632	0.356065		3.75175	0.0535062	0.0940068	0.00185365	0.408457	1516.62	7.5	1523.23	9.67	1507.4	18.6		1524.91	9.68		0.433946	1.03924		n.d.	n.d.	n.d.	n.d.	n.d.	n.d.	n.d.	n.d.	n.d.	n.d.	n.d.	n.d.	n.d.	n.d.	n.d.	n.d.
MKED-7	127.76	0.357605		3.7725	0.0683449	0.0946817	0.00156846	0.350248	1517.91	7.8	1515.8	12.2	1520.9	15.6		1515.2	12.2		-0.1392	-0.336456		n.d.	n.d.	n.d.	n.d.	n.d.	n.d.	n.d.	n.d.	n.d.	n.d.	n.d.	n.d.	n.d.	n.d.	n.d.	n.d.
MKED-8	125.896	0.361327		3.78984	0.0603542	0.0937721	0.0013149	-0.112335	1506.71	8.78	1509.6	10.7	1502.7	13.3		1510.3	10.7		0.191441	0.457075		n.d.	n.d.	n.d.	n.d.	n.d.	n.d.	n.d.	n.d.	n.d.	n.d.	n.d.	n.d.	n.d.	n.d.	n.d.	n.d.
MKED-9	123.408	0.356821		3.79202	0.0836143	0.0946499	0.00149392	0.203902	1513.58	9.58	1508.8	14.8	1520.3	14.9		1507.6	14.8		-0.316808	-0.762195		n.d.	n.d.	n.d.	n.d.	n.d.	n.d.	n.d.	n.d.	n.d.	n.d.	n.d.	n.d.	n.d.	n.d.	n.d.	n.d.
MKED-10	138.685	0.361735		3.78937	0.0681596	0.0955041	0.00152265	0.188644	1521.21	8.54	1509.7	12.1	1537.2	15		1506.8	12.1		-0.762403	-1.82155		n.d.	n.d.	n.d.	n.d.	n.d.	n.d.	n.d.	n.d.	n.d.	n.d.	n.d.	n.d.	n.d.	n.d.	n.d.	n.d.
MKED-11	128.984	0.355556		3.76671	0.070029	0.0935474	0.00156449	0.404929	1509.63	7.59	1517.8	12.6	1498.1	15.8		1519.9	12.6		0.538279	1.29793		n.d.	n.d.	n.d.	n.d.	n.d.	n.d.	n.d.	n.d.	n.d.	n.d.	n.d.	n.d.	n.d.	n.d.	n.d.	n.d.
MKED-12	130.547	0.345361		3.77812	0.0732382	0.0943565	0.00200456	0.606657	1514.03	7.12	1513.8	13.1	1514.4	20		1513.7	13.1		-0.0151936	-0.0396354		n.d.	n.d.	n.d.	n.d.	n.d.	n.d.	n.d.	n.d.	n.d.	n.d.	n.d.	n.d.	n.d.	n.d.	n.d.	n.d.
MKED-13	131.085	0.35248		3.79616	0.0713162	0.0953603	0.00152957	0.312257	1518.61	8.09	1507.3	12.6	1534.3	15.1		1504.5	12.6		-0.750348	-1.79128		n.d.	n.d.	n.d.	n.d.	n.d.	n.d.	n.d.	n.d.	n.d.	n.d.	n.d.	n.d.	n.d.	n.d.	n.d.	n.d.
MKED-14	130.685	0.354331		3.77069	0.0747673	0.0959359	0.00157936	0.262878	1528.67	8.77	1516.4	13.4	1545.7	15.5		1513.3	13.4		-0.809153	-1.93221		n.d.	n.d.	n.d.	n.d.	n.d.	n.d.	n.d.	n.d.	n.d.	n.d.	n.d.	n.d.	n.d.	n.d.	n.d.	n.d.
MKED-15	134.433	0.357343		3.74221	0.0780674	0.0943468	0.00142888	0.324652	1521.47	8.45	1526.7	14.2	1514.2	14.3		1528	14.2		0.342569	0.818759		n.d.	n.d.	n.d.	n.d.	n.d.	n.d.	n.d.	n.d.	n.d.	n.d.	n.d.	n.d.	n.d.	n.d.	n.d.	n.d.
MKED-16	128.939	0.358392		3.78634	0.0751976	0.0941552	0.00171114	0.375528	1510.64	8.37	1510.8	13.4	1510.4	17.2		1510.9	13.4		0.0105904	0.026476		n.d.	n.d.	n.d.	n.d.	n.d.	n.d.	n.d.	n.d.	n.d.	n.d.	n.d.	n.d.	n.d.	n.d.	n.d.	n.d.
MKED-17	131.387	0.361554		3.77774	0.0561269	0.0937115	0.00155632	0.421173	1508.72	6.67	1513.9	10	1501.5	15.7		1515.2	10		0.342163	0.819077		n.d.	n.d.	n.d.	n.d.	n.d.	n.d.	n.d.	n.d.	n.d.	n.d.	n.d.	n.d.	n.d.	n.d.	n.d.	n.d.
[truncated: 311 more rows]

## Sheet: Table 7 Oxygen Thermometry
Supplementary Table 7. CUCAMONGA BLOCK SAMPLES USED FOR QUARTZ-GARNET OXYGEN ISOTOPE THERMOMETRY
[truncated: 11 more rows]

## Sheet: Table 8 SCB U-Pb Compilation
Supplementary Table 8. Compilation of new and existing ages for the Southern California Batholith
[truncated: 295 more rows]
